# Supplementary material for: miRNAs mediate SnRK1-dependent energy signaling in Arabidopsis
Source: Front Plant Sci. 2013 Jun 20;4:197. doi: 10.3389/fpls.2013.00197 (PMC3687772; doi:10.3389/fpls.2013.00197)
Supplement: Table S5 — List of SGs misregulated in dcl1–9. [file DataSheet5.XLSX]

## Sheet: Induced
SUPPLEMENTARY TABLE 5A. LIST OF INDUCED STARVATION GENES MISREGULATED IN dcl1-9 (INDUCED SGDs).																																				FC values retrieved from Ronemus et al., 2006, Table S4
Accession	Probe set	Gene	EntrezGene	Description	WTL_1	WTL_2	WTL_3	WTL mean	WTL_mean's SE	WTD_1	WTD_2	WTD_3	WTD mean	WTD mean's SE	Fold change (WTD/WTL)	Lower bound of FC (WTD/WTL)	Upper bound of FC (WTD/WTL)	Filtered	dcl1L_1	dcl1L_2	dcl1L_3	dcl1L mean	dcl1L mean's SE	dcl1D_1	dcl1D_2	dcl1D_3	dcl1D mean	dcl1D mean's SE	Fold change (dcl1D/dcl1L)	Lower bound of FC (dcl1D/dcl1L)	Upper bound of FC (dcl1D/dcl1L)	Filtered	% Misregulation	Lower bound of FC (dcl1L/WTL)	Filtered	ago1-9 9d FC	ago1-9 21d FC	dcl1-9 21d FC
AT5G27350	AT5G27350_at	SFP1	chr5:9648667-9654426 FORWARD LENGTH=1966	Major facilitator superfamily protein	117.82	98.67	168.31	128.05	21.15	219.83	241.95	203	221.44	13.04	1.73	1.33	2.4	*	231.53	234.86	310.68	258.34	26.7	117.55	151.63	112.03	126.83	13.48	-2.04	-1.59	-2.61	*	219.549	1.49	*	0	0	0
AT5G64850	AT5G64850_at		chr5:25921409-25923358 FORWARD LENGTH=841	FUNCTIONS IN: molecular_function unknown; INVOLVED IN: biological_process unknown; LOCATED IN: plasma membrane; EXPRESSED IN: 22 plant structures; EXPRESSED DURING: 13 growth stages; CONTAINS InterPro DOMAIN/s: RPM1-interacting protein 4, defence response (InterPro:IPR008700); BEST Arabidopsis thaliana protein match is: unknown protein (TAIR:AT5G09960.1); Has 30201 Blast hits to 17322 proteins in…	41.69	29.62	50.62	40.63	6.32	59.26	62.09	71.38	64.17	4.29	1.58	1.22	2.16	*	20.44	19.33	21.14	20.3	1.46	18.34	14.09	21.81	17.91	2.73	-1.13	-0.88	-1.54	0	172.131	-1.46	*	0	0	0
AT4G31130	AT4G31130_at		chr4:15136935-15138840 REVERSE LENGTH=1063	Protein of unknown function (DUF1218)	217.27	229.47	236.3	227.63	8.14	289.38	311.75	345.6	315.51	17.75	1.39	1.24	1.54	*	185.74	210.46	241.95	212.43	17.04	200.24	198.59	213.96	204.09	6.94	-1.04	-0.89	-1.19	0	171.774	-0.93	0	0	0	0
AT1G08920	AT1G08920_at	ESL1	chr1:2867259-2870656 FORWARD LENGTH=1896	ERD (early response to dehydration) six-like 1	50.49	45.58	49.72	48.84	2.52	86.5	82.56	93.53	87.69	4.06	1.8	1.6	2.01	*	87.15	93.02	100.7	93.15	4.82	66.29	87.11	70.59	74.54	6.97	-1.25	-1.06	-1.5	0	166.25	1.69	*	0	0	0
AT1G20180	AT1G20180_at		chr1:6996210-6997943 FORWARD LENGTH=1481	Protein of unknown function (DUF677)	3.61	6.26	2.97	4.28	1.16	7.74	7.14	8.66	7.83	0.8	1.83	1.21	3.36	*	3.83	4.48	5.53	4.52	0.7	5.26	3.65	4.45	4.37	0.61	-1.03	-0.72	-1.46	0	159.504	0.66	0	0	0	0
AT5G04020	AT5G04020_at		chr5:1081611-1086546 REVERSE LENGTH=4780	calmodulin binding	12.39	9.75	7.88	10.27	1.88	16.64	17.1	17.82	17.12	1.35	1.67	1.24	2.43	*	24.37	29.56	17.43	23.7	3.77	30.25	20.25	19.26	23.23	3.56	-1.02	-0.7	-1.48	0	156.452	1.54	*	0	0	0
AT5G52120	AT5G52120_at	AtPP2-A14, PP2-A14	chr5:21176422-21180310 REVERSE LENGTH=1282	phloem protein 2-A14	60.12	44.82	46.76	50.49	5.04	118.03	116.04	120.13	118.13	3.18	2.34	2	2.81	*	51.97	48.52	59.63	53.34	3.69	34.68	42.75	45.14	40.47	4.08	-1.32	-1.08	-1.63	0	154	0.87	0	0	0	0
AT3G45290	AT3G45290_at	MLO3, ATMLO3	chr3:16617544-16621370 FORWARD LENGTH=1587	Seven transmembrane MLO family protein	34.08	38.5	38.87	36.99	2.65	55.51	52.62	60.72	55.96	3.84	1.51	1.28	1.78	*	33.55	64.9	47.43	48.35	9.82	42	66.22	30.52	46.23	10.91	-1.05	-0.62	-1.84	0	148.438	0.86	0	0	0	0
AT3G14770	AT3G14770_at	SWEET2, AtSWEET2	chr3:4957334-4959704 REVERSE LENGTH=1666	Nodulin MtN3 family protein	59.51	50.11	99.11	69.42	15.2	151.18	154.98	250.3	185.49	32.63	2.67	1.69	4.45	*	28.89	27.51	36.06	30.62	3.02	21.83	31.53	36.85	29.99	4.7	-1.02	-0.76	-1.42	0	144.97	-1.42	*	0	0	0
AT5G41080	AT5G41080_at		chr5:16441744-16443985 FORWARD LENGTH=1389	PLC-like phosphodiesterases superfamily protein	140.41	105.84	156.68	134.19	15.19	701.34	677.79	1116.11	828.52	144.93	6.17	4.23	8.56	*	124.75	172.57	219.94	172.29	27.87	123.18	99.86	221.42	147.89	37.54	-1.16	-0.73	-2.09	0	117.258	0.9	0	0	0	0
AT5G56870	AT5G56870_at	BGAL4	chr5:23004196-23008649 FORWARD LENGTH=2502	beta-galactosidase 4	8.05	12.25	6.21	8.46	2.51	648.66	679.45	698.25	672.36	19.34	79.45	53.19	155.55	*	7.97	14.52	14.48	12.46	2.91	124.88	164.77	312.54	200.56	57.6	16.1	7.91	29.88	*	85.1288	0.79	0	0	0	0
AT1G15380	AT1G15380_at		chr1:5290745-5292535 FORWARD LENGTH=983	Lactoylglutathione lyase / glyoxalase I family protein	7.96	7.52	5.75	7.12	1.51	118.66	99.71	269.58	162.67	53.75	22.86	9.96	42.12	*	8.45	7.76	8.16	8.12	1.12	20.18	17.43	30.87	22.67	4.42	2.79	1.81	4.08	*	81.8273	0.77	0	0	0	0
AT1G35140	AT1G35140_at	PHI-1, EXL7	chr1:12851997-12853128 FORWARD LENGTH=1132	Phosphate-responsive 1 family protein	20.14	15.12	10.49	15.34	3.22	198.96	137.23	262.86	199.65	36.28	13.01	8.2	21.36	*	29.17	8.91	11.33	16.53	6.41	59.36	42.53	64.76	55.66	6.79	3.37	1.95	9.4	*	76.2195	0.38	0	0	0	0
AT3G61060	AT3G61060_at	AtPP2-A13, PP2-A13	chr3:22602910-22604578 FORWARD LENGTH=1374	phloem protein 2-A13	37.81	22.52	44.41	35.19	6.81	339.91	271.19	407.53	339.58	39.39	9.65	6.81	14.67	*	20.24	25.58	29.65	24.97	3.46	55.73	45.86	79.03	60.25	10.29	2.41	1.64	3.45	*	75.9178	-0.91	0	0	0	0
AT2G28110	AT2G28110_at	FRA8, IRX7	chr2:11977944-11979837 REVERSE LENGTH=1623	Exostosin family protein	16.17	15.95	13.96	15.28	1.67	157.17	233.92	214.69	201.93	23.76	13.21	10.08	17.22	*	12.42	17.9	18.75	16.33	2.52	51.57	66.18	115.74	77.74	19.61	4.76	2.67	7.51	*	73.5119	0.76	0	0	0	0
AT5G52250	AT5G52250_at	RUP1	chr5:21216855-21218226 FORWARD LENGTH=1372	Transducin/WD40 repeat-like superfamily protein	24.05	17.17	21.2	20.65	2.69	219.16	222.78	285.64	242.56	21.77	11.75	9.13	15.49	*	31.69	21.75	29.62	27.69	3.11	82.67	94.4	174.49	117.05	29.04	4.23	2.44	6.31	*	73.2749	1.01	0	0	0	0
AT5G65110	AT5G65110_at	ACX2, ATACX2	chr5:26009635-26012514 REVERSE LENGTH=2297	acyl-CoA oxidase 2	28.38	28.82	35.75	30.84	3.07	242.44	274.55	289.99	268.68	14.88	8.71	7.28	10.62	*	36.52	79.08	89.71	68.34	16.55	183.43	187.92	215.91	196.04	10.79	2.87	2.02	4.8	*	72.2527	1.31	*	0	0	0
AT1G19510	AT1G19510_at	ATRL5, RSM4, RL5	chr1:6756284-6757377 REVERSE LENGTH=589	RAD-like 5	3.61	6.48	5.9	5.34	1.26	60.29	36.06	83.99	60.3	13.92	11.3	6.35	20.25	*	3.08	8.06	6.65	5.89	1.74	18.13	15.65	31.81	21.71	5.3	3.69	1.93	7.71	*	69.6063	0.53	0	0	0	0
AT5G56100	AT5G56100_at		chr5:22717115-22717751 FORWARD LENGTH=637	glycine-rich protein / oleosin	13.76	17.87	18.37	16.49	2.79	106.52	76.42	216.5	133.17	42.61	8.07	3.7	13.81	*	8.55	14.46	11.63	11.24	2.68	16.84	18.19	29.85	21.56	4.41	1.92	1.13	3.4	0	69.4595	-0.92	0	0	0	0
AT2G41640	AT2G41640_at		chr2:17360486-17363788 FORWARD LENGTH=2496	Glycosyltransferase family 61 protein	25.2	34.4	25.23	28.31	3.77	108.12	120.19	154.29	127.23	14.52	4.49	3.37	6.07	*	26.52	80.7	51.35	52.79	16.09	72.48	85.57	92.94	83.5	6.49	1.58	1.03	3.2	0	69.4362	0.91	0	0	0	0
AT4G28085	AT4G28085_at		chr4:13960032-13960483 FORWARD LENGTH=452	unknown protein; Has 30201 Blast hits to 17322 proteins in 780 species: Archae - 12; Bacteria - 1396; Metazoa - 17338; Fungi - 3422; Plants - 5037; Viruses - 0; Other Eukaryotes - 2996 (source: NCBI BLink).	20.83	26.04	19.49	22.28	3	174.71	151.89	208.46	178.39	16.51	8	6.17	10.66	*	17.47	17.62	20.79	18.41	1.84	37.81	49.76	58.98	48.61	6.76	2.64	1.96	3.47	*	68.2334	-0.9	0	0	0	0
AT3G30775	AT3G30775_at	ERD5, PRODH, AT-POX, ATPOX, ATPDH, PRO1	chr3:12448636-12451248 REVERSE LENGTH=1866	Methylenetetrahydrofolate reductase family protein	649.81	366.51	683.09	566.06	100.53	1614.86	1628.55	1515.97	1586.2	42.58	2.8	2.16	3.97	*	396.86	369.96	754.25	506.56	124.65	575.13	405.84	661.69	547.45	75.65	1.08	0.7	1.88	0	67.5926	-0.69	0	0	0	0
AT5G22920	AT5G22920_at		chr5:7664991-7667265 FORWARD LENGTH=1262	CHY-type/CTCHY-type/RING-type Zinc finger protein	39.72	24.96	76.76	47.08	15.51	1217.03	1290.05	1464.41	1323.09	76.47	28.11	17.99	61.58	*	14.88	58.16	123.3	65.24	31.79	761.09	587.49	810.35	719.37	68.24	11.03	5.95	55.72	*	66.9261	0.27	0	0	0	0
AT1G03090	AT1G03090_at	MCCA	chr1:739679-744184 FORWARD LENGTH=2546	methylcrotonyl-CoA carboxylase alpha chain, mitochondrial / 3-methylcrotonyl-CoA carboxylase 1 (MCCA)	52.04	38.7	44.03	44.61	4.94	783.45	713.68	889.63	795.76	52.14	17.84	14.56	22.33	*	54.65	84.27	101.47	80.31	14.5	559.48	519.87	722.55	600.29	62.8	7.47	5.42	10.98	*	62.7747	1.22	*	0	0	0
AT1G09420	AT1G09420_at	G6PD4	chr1:3038462-3041819 REVERSE LENGTH=2160	glucose-6-phosphate dehydrogenase 4	10.42	13.01	9.47	11.07	1.58	76.23	46.37	66.93	63.11	8.89	5.7	4.07	7.99	*	12.64	14.94	11.84	13.1	1.73	25.51	23.08	33.34	27.25	3.32	2.08	1.54	2.82	*	62.1622	0.86	0	0	0	0
AT1G10070	AT1G10070_at	ATBCAT-2, BCAT-2	chr1:3288087-3290471 FORWARD LENGTH=1558	branched-chain amino acid transaminase 2	23.26	64.75	19.52	35.69	14.91	697.6	551.88	1017.7	755.77	137.64	21.17	11.2	69.05	*	30.78	17.42	16.71	20.26	5.84	138.51	142.04	352.86	210.93	71.12	10.41	4.29	22.57	*	61.6964	-0.53	0	0	0	0
AT5G28770	AT5G28770_at	BZO2H3, AtbZIP63	chr5:10796459-10798207 REVERSE LENGTH=1173	bZIP transcription factor family protein	13.41	9.67	19.97	14.19	3.39	250.28	198.79	205.67	218.33	16.16	15.38	10.76	25.61	*	7.3	11.27	23.34	13.91	5.02	97.33	75.17	127.09	99.78	15.19	7.17	4.13	18	*	61.6171	-0.52	0	0	0	0
AT5G39520	AT5G39520_at		chr5:15823735-15825492 REVERSE LENGTH=954	Protein of unknown function (DUF1997)	11.4	13.63	16.46	13.54	2.41	61.4	57.03	84.7	67.79	8.84	5.01	3.52	7.44	*	11.19	13.28	12.18	12.13	1.99	18.68	24.6	25.59	22.82	2.75	1.88	1.36	2.7	*	61.3636	-0.73	0	0	0	0
AT3G22460	AT3G22460_at	OASA2	chr3:7963537-7965907 FORWARD LENGTH=1157	O-acetylserine (thiol) lyase (OAS-TL) isoform A2	5.68	6.87	3.45	5.26	1.71	40.91	51.13	35.63	42.71	5.51	8.12	4.96	17.78	*	15.51	8.33	10.14	10.82	2.73	32.94	44.72	25.45	34.38	6.13	3.18	1.95	5.74	*	60.6855	1.04	0	0	0	0
AT1G25400	AT1G25400_at		chr1:8911130-8912398 REVERSE LENGTH=1269	unknown protein; BEST Arabidopsis thaliana protein match is: unknown protein (TAIR:AT1G68440.1); Has 21 Blast hits to 21 proteins in 6 species: Archae - 0; Bacteria - 0; Metazoa - 0; Fungi - 0; Plants - 21; Viruses - 0; Other Eukaryotes - 0 (source: NCBI BLink).	22.04	24.77	14.87	20.74	3.4	63.97	59.51	88.48	70.89	9.38	3.42	2.43	4.95	*	18.44	22.85	18.5	19.97	2.28	24.57	27.08	21.96	24.44	2.35	1.22	0.96	1.58	0	60.4938	-0.73	0	0	0	0
AT2G40000	AT2G40000_at	HSPRO2, ATHSPRO2	chr2:16700510-16702028 REVERSE LENGTH=1519	ortholog of sugar beet HS1 PRO-1 2	19.68	26.19	20.65	21.89	2.92	375.86	357.49	449.67	393.89	28.75	18	14.21	23.6	*	13.19	73.05	35.98	40.73	17.71	361.45	374.95	506.68	414.48	46.73	10.18	5.69	35.97	*	59.9578	0.53	0	0	0	0
AT4G37610	AT4G37610_at	BT5	chr4:17670481-17672353 REVERSE LENGTH=1438	BTB and TAZ domain protein 5	17.48	12.44	24.58	18.04	3.88	145.84	149.38	195.86	163.81	16.66	9.08	6.36	14.4	*	8.88	15.79	26.02	16.74	5.26	69.24	55.8	78.49	67.95	6.96	4.06	2.57	8.51	*	59.5912	-0.59	0	0	0	0
AT2G29290	AT2G29290_at		chr2:12585856-12587742 FORWARD LENGTH=1361	NAD(P)-binding Rossmann-fold superfamily protein	36.21	19.06	34.76	30.2	5.98	66.86	60.07	110.01	78.74	16.2	2.61	1.58	4.25	*	8.59	25.31	46.76	26.22	11.73	34.78	21.82	52.11	36.12	9.13	1.38	0.64	5.37	0	59.4937	-0.58	0	0	0	0
AT3G47340	AT3G47340_at	ASN1, DIN6, AT-ASN1	chr3:17437884-17441242 REVERSE LENGTH=2299	glutamine-dependent asparagine synthase 1	8.14	18.12	14.24	13.02	4.09	1806.14	1669.51	2167.17	1878.94	150.82	144.3	92.76	300.64	*	10.12	23.91	33.61	22.4	7.21	1369.28	1107.92	1861.31	1447.14	220.84	64.6	38.53	141.03	*	58.4627	0.73	0	0	0	0.422
AT5G14180	AT5G14180_at	MPL1	chr5:4571337-4574462 REVERSE LENGTH=1411	Myzus persicae-induced lipase 1	13.08	11.06	10.21	11.41	2.34	225.86	192.82	272.63	230.46	23.22	20.21	14.33	31.27	*	8.01	9.25	12.28	9.48	2.29	89.81	64.54	113.82	89.17	14.44	9.41	5.96	16.4	*	58.4089	-0.71	0	0	0	0
AT5G40890	AT5G40890_at	ATCLC-A, CLC-A, CLCA, ATCLCA	chr5:16381314-16384319 REVERSE LENGTH=2669	chloride channel A	26.1	27.38	36.34	29.7	3.77	250.46	319.63	189.38	252.8	38.89	8.51	6.02	11.78	*	46.2	120.81	163.01	109.84	34.55	435.02	478.59	386.64	432.83	28.24	3.94	2.55	8.21	*	57.6412	1.75	*	0	0	0
AT5G18630	AT5G18630_at		chr5:6202609-6205737 FORWARD LENGTH=1606	alpha/beta-Hydrolases superfamily protein	40.55	50.3	48.34	45.83	4.33	416.9	539.41	454.42	470.34	38.38	10.26	8.37	12.67	*	36.23	66.2	79.94	60.4	13.58	263.34	349.88	306.3	305.8	27.06	5.06	3.56	8.17	*	57.4671	0.81	0	0	0	0
AT3G15760	AT3G15760_at		chr3:5337547-5338467 FORWARD LENGTH=843	unknown protein; FUNCTIONS IN: molecular_function unknown; INVOLVED IN: biological_process unknown; LOCATED IN: endomembrane system; EXPRESSED IN: 22 plant structures; EXPRESSED DURING: 10 growth stages; BEST Arabidopsis thaliana protein match is: unknown protein (TAIR:AT1G52565.1); Has 42 Blast hits to 42 proteins in 10 species: Archae - 0; Bacteria - 0; Metazoa - 0; Fungi - 0; Plants - 42; Viru…	29.27	33.28	38.99	33.81	3.32	183.02	254.37	324.12	253.86	41.04	7.51	5.33	10.08	*	15.64	40.45	43.21	33.06	9.06	98.34	113.17	173.72	128.17	23.36	3.88	2.32	7.41	*	56.4728	-0.68	0	0	0	0
AT5G23050	AT5G23050_at	AAE17	chr5:7731269-7735439 REVERSE LENGTH=2450	acyl-activating enzyme 17	46.07	36.16	56.12	46.2	5.96	155.74	131.4	176.7	154.3	13.56	3.34	2.61	4.39	*	91.36	81.97	99.96	91.06	5.78	145.15	105.16	126.86	125.5	11.68	1.38	1.14	1.65	0	56.3218	1.58	*	0	0	0
AT1G18270	AT1G18270_at		chr1:6283412-6293871 REVERSE LENGTH=4443	ketose-bisphosphate aldolase class-II family protein	58.98	72.08	49.97	60.32	7.07	316.35	302.71	293.35	303.86	8.14	5.04	4.2	6.27	*	85.83	123.77	94.36	101.31	12.03	220.31	237.85	217.95	225.23	8.7	2.22	1.84	2.79	*	56.1905	1.27	*	0	0	0
AT1G10340	AT1G10340_at		chr1:3390322-3392524 REVERSE LENGTH=1921	Ankyrin repeat family protein	32.16	43.45	27.57	34.42	5.01	53.47	100.43	94.24	82.75	15.09	2.4	1.59	3.51	*	19.78	83.4	73.51	58.87	20.01	49.66	94.53	75.08	73.05	13.23	1.24	0.7	2.91	0	55.9748	0.74	0	0	0	0
AT5G49450	AT5G49450_at	AtbZIP1, bZIP1	chr5:20051829-20052735 FORWARD LENGTH=907	basic leucine-zipper 1	8.89	6.73	9.58	8.43	1.68	95.37	97.96	108.35	100.46	5.03	11.92	8.85	17.88	*	7.72	5.62	8.83	7.35	1.8	48.53	33.13	75.29	52.3	12.35	7.12	3.93	13.06	*	55.5932	-0.68	0	0	0	0
AT2G22860	AT2G22860_at	ATPSK2, PSK2	chr2:9737607-9738298 FORWARD LENGTH=544	phytosulfokine 2 precursor	114.27	144.33	75.02	110.86	20.76	333.36	326.63	806.37	488.78	158.91	4.41	1.97	7.77	*	123.07	88.33	81.49	97.58	12.97	115.4	91.69	137.23	114.65	13.56	1.17	0.88	1.59	0	55.3299	-0.75	0	4.446	0	0
AT3G29240	AT3G29240_at		chr3:11191491-11192986 FORWARD LENGTH=1233	Protein of unknown function (DUF179)	45.07	48.44	61.55	51.4	5.67	159.53	134.58	208.76	167.6	21.96	3.26	2.43	4.31	*	25.65	80.2	67.67	57.78	16.8	79.37	97.66	120.66	99.3	12.3	1.72	1.09	3.37	0	55.144	0.58	0	0	0	0
AT5G19120	AT5G19120_at		chr5:6414488-6415907 FORWARD LENGTH=1420	Eukaryotic aspartyl protease family protein	31.12	25.47	65.28	40.81	12.68	668.3	708.65	891.67	756.57	69.43	18.54	11.86	38.31	*	46.97	81.11	101.8	76.27	16.64	498.81	564.15	665.78	576.01	49.73	7.55	5.35	11.99	*	54.8904	1.02	0	0	0	0
AT3G02040	AT3G02040_at	SRG3	chr3:348167-350010 REVERSE LENGTH=1525	senescence-related gene 3	85.86	233.9	149.97	156.34	43.72	323.51	418.03	655.21	465.61	99.03	2.98	1.68	5.87	*	336.29	412.68	302.74	350.5	33.45	257.42	437.16	505.1	399.83	74.43	1.14	0.77	1.57	0	54.1667	1.48	*	0	0	0
AT1G02660	AT1G02660_at		chr1:571955-574981 REVERSE LENGTH=2609	alpha/beta-Hydrolases superfamily protein	15.85	21	15.95	17.31	3.08	165.87	153.41	179.05	166.03	8.19	9.59	7.31	13.68	*	10.24	18.98	15.89	14.89	3.05	66.02	63.96	79.63	69.63	5.65	4.68	3.38	7.17	*	53.762	-0.74	0	0	0	0
AT3G01290	AT3G01290_at		chr3:88054-89422 REVERSE LENGTH=1122	SPFH/Band 7/PHB domain-containing membrane-associated protein family	315.18	564.54	296.79	391.67	88.21	1046.87	1050.46	1177.84	1091.96	44.72	2.79	2.02	4.45	*	270.71	749.09	536.89	518.41	140.42	607.48	812.12	758.61	726.44	63.54	1.4	0.94	2.56	0	53.4653	0.68	0	0	0	0
AT3G45300	AT3G45300_at	IVD, ATIVD, IVDH	chr3:16620203-16625048 REVERSE LENGTH=2886	isovaleryl-CoA-dehydrogenase	98.48	118.13	79.83	98.69	11.81	799.87	703.75	930.85	811.13	66.51	8.22	6.52	10.58	*	144.68	212.5	177.54	177.62	21.48	637.49	699.79	643.82	659.87	24.93	3.72	3.06	4.67	*	53.0675	1.35	*	0	0	0
AT5G20250	AT5G20250_at	DIN10	chr5:6833659-6836782 FORWARD LENGTH=2737	Raffinose synthase family protein	118.83	138.12	178.58	145.33	18.16	1409.72	1521.07	1452.82	1464.9	42.59	10.08	8.31	12.74	*	41.38	138.65	270.45	149.79	66.93	1063.29	885.07	1156.46	1035.34	81.17	6.91	3.91	26.16	*	52.9483	0.27	0	0	0	0
AT2G28720	AT2G28720_at		chr2:12326978-12327678 FORWARD LENGTH=701	Histone superfamily protein	26.75	20.13	20.94	22.73	2.52	53.45	41.44	61.59	51.94	6.19	2.28	1.74	2.99	*	20.77	28.76	35.26	28.08	4.65	27.59	35.27	30.4	31.25	3.35	1.11	0.82	1.59	0	52.8736	0.86	0	0	0	0
AT3G15450	AT3G15450_at		chr3:5212984-5214119 FORWARD LENGTH=882	Aluminium induced protein with YGL and LRDR motifs	12.12	17.74	23.24	17.66	4.45	1514.14	1701.69	1898.36	1702.62	114.66	96.42	66.77	165.99	*	24.3	21.67	32.82	27.02	6.59	1105.71	1157.88	1473.13	1245.61	116.53	46.11	31.58	78.35	*	52.7033	0.83	0	0.355	0	0.639
AT2G32150	AT2G32150_at		chr2:13659006-13660764 FORWARD LENGTH=1114	Haloacid dehalogenase-like hydrolase (HAD) superfamily protein	51.18	51.81	41.69	48.17	4.41	113.35	124	197.57	145.07	26.68	3.01	2.05	4.11	*	39.86	54.91	52.48	49.01	5.27	61.13	53.3	88.04	67.35	10.84	1.37	0.97	1.87	0	52.6829	0.8	0	0.221	0	0
AT4G19160	AT4G19160_at		chr4:10477306-10480120 FORWARD LENGTH=2027	unknown protein; Has 30201 Blast hits to 17322 proteins in 780 species: Archae - 12; Bacteria - 1396; Metazoa - 17338; Fungi - 3422; Plants - 5037; Viruses - 0; Other Eukaryotes - 2996 (source: NCBI BLink).	106.51	96.48	148.19	117.82	16.71	601.84	601.04	741.38	647.44	48.25	5.5	4.29	7.33	*	65.35	97.69	121.34	94.11	17.72	243.33	234.49	328.16	268.97	30.95	2.86	2.03	4.29	*	52.6807	-0.86	0	0	0	0.605
AT4G33150	AT4G33150_at		chr4:15985189-15991536 REVERSE LENGTH=3576	lysine-ketoglutarate reductase/saccharopine dehydrogenase bifunctional enzyme	10.94	17.59	15.75	14.53	3.44	110.25	113.63	142.33	122.33	10.8	8.42	5.84	14.01	*	29.8	19.15	19.13	22.39	4.28	88.21	86.37	75.03	83.14	4.86	3.71	2.77	5.47	*	52.5685	0.93	0	0	0	0
AT1G63180	AT1G63180_at	UGE3	chr1:23427409-23429603 REVERSE LENGTH=1425	UDP-D-glucose/UDP-D-galactose 4-epimerase 3	10.33	15.74	9.41	11.71	2.59	120.97	93.8	97.32	104.12	9.14	8.89	6.28	14.21	*	14.84	15.47	14.73	15.06	2.12	56.19	52.92	78.46	62.27	8.5	4.14	2.98	5.76	*	52.5478	0.86	0	0	0	0
AT1G11380	AT1G11380_at		chr1:3832623-3834191 FORWARD LENGTH=1107	PLAC8 family protein	103.58	73.79	111.06	95.82	11.93	650.77	498.37	604.83	584.44	45.26	6.1	4.84	7.89	*	77.08	90.09	107.47	91.72	9.55	296.33	215.61	284.81	265.65	25.3	2.9	2.3	3.67	*	52.4793	-0.79	0	0	0	0
AT3G15500	AT3G15500_at	ATNAC3, ANAC055, NAC055, NAC3	chr3:5234617-5236088 FORWARD LENGTH=1274	NAC domain containing protein 3	11.71	13.63	10.91	12.26	1.53	46.07	86.47	84.92	72.37	13.59	5.9	3.91	8.41	*	10.26	18.59	16.76	15.13	2.77	28.36	51.82	69.04	49.72	11.96	3.29	1.87	5.36	*	52.1739	0.83	0	0	0	0
AT4G16690	AT4G16690_at	ATMES16, MES16	chr4:9392147-9393529 REVERSE LENGTH=1152	methyl esterase 16	14.69	17	20.71	17.21	2.52	82.78	160.72	286.27	176.6	59.51	10.26	4.47	17.32	*	9.24	13.54	23.89	15.48	4.58	48.62	53.05	115.76	72.39	21.8	4.68	2.14	10.11	*	52.1253	-0.68	0	0	0	0
AT2G43400	AT2G43400_at	ETFQO	chr2:18021180-18025292 FORWARD LENGTH=2277	electron-transfer flavoprotein:ubiquinone oxidoreductase	97.91	89.63	87.83	91.72	4.95	548.84	440.46	499.37	496.22	31.5	5.41	4.71	6.2	*	96.18	139.34	158.05	131.19	18.82	418.74	322.07	412.19	384.34	31.26	2.93	2.27	3.94	*	51.8047	1.08	0	0	0	0
AT1G69890	AT1G69890_at		chr1:26323111-26324616 REVERSE LENGTH=1244	Protein of unknown function (DUF569)	65.6	69.41	74.48	69.51	4.95	166.57	205.5	267.86	213.08	30.33	3.07	2.3	3.92	*	48.98	91.7	71.09	70.6	12.78	82.42	148.46	125.86	118.9	19.97	1.68	1.11	2.58	0	51.7391	0.7	0	0	0	0
AT4G30850	AT4G30850_at	HHP2	chr4:15020182-15022445 REVERSE LENGTH=1521	heptahelical transmembrane protein2	33.82	29.41	38.74	33.9	3.72	224.86	175.18	324.65	241.58	44.04	7.13	4.82	9.91	*	23.39	18.45	18.82	20.27	2.69	56.35	60.26	87.44	67.58	10.46	3.33	2.34	4.66	*	51.4523	-1.26	*	0	0	0
AT1G35670	AT1G35670_at	ATCDPK2, CPK11, ATCPK11, CDPK2	chr1:13205381-13208252 FORWARD LENGTH=1757	calcium-dependent protein kinase 2	21.01	35.13	27.64	27.89	4.77	143.18	191.94	122.23	152.64	21.34	5.47	3.82	8.06	*	24.49	62.01	42.34	42.89	11.18	112.97	108.01	125.94	115.37	5.86	2.69	1.86	4.73	*	51.3089	0.84	0	0	0	0
AT1G30720	AT1G30720_at		chr1:10898172-10899912 FORWARD LENGTH=1741	FAD-binding Berberine family protein	10.62	14.45	14.89	13.36	2.27	89.3	97.86	180.63	122.72	29.37	9.18	5.28	14.64	*	10.94	14.82	11.56	12.35	2.13	40.96	38.89	47.03	42.41	3.33	3.43	2.58	4.89	*	51.1364	-0.72	0	0	0	0
AT4G15530	AT4G15530_at	PPDK	chr4:8864828-8869273 REVERSE LENGTH=2718	pyruvate orthophosphate dikinase	104.29	135.19	91.78	110.58	14.22	325.38	325.05	380.27	343.76	19.72	3.11	2.5	4.01	*	113.49	107.25	101.94	107	5.08	134.75	154.29	180.37	156.5	13.79	1.46	1.23	1.71	*	50.8	-0.81	0	0	0	0
AT1G58180	AT1G58180_at	ATBCA6, BCA6	chr1:21537852-21539914 REVERSE LENGTH=1132	beta carbonic anhydrase 6	36.49	42.51	30.94	36.74	4.38	191.71	166.89	254.09	204.05	26.13	5.55	4.13	7.42	*	44.64	54.66	68.35	56.29	8	151.89	129.05	152.95	144.99	8.68	2.58	2.04	3.41	*	50.6053	1.11	0	0	0	0
AT3G15630	AT3G15630_at		chr3:5296847-5297599 REVERSE LENGTH=753	unknown protein; FUNCTIONS IN: molecular_function unknown; INVOLVED IN: biological_process unknown; LOCATED IN: chloroplast; EXPRESSED IN: 24 plant structures; EXPRESSED DURING: 15 growth stages; BEST Arabidopsis thaliana protein match is: unknown protein (TAIR:AT1G52720.1); Has 61 Blast hits to 61 proteins in 13 species: Archae - 0; Bacteria - 0; Metazoa - 0; Fungi - 0; Plants - 61; Viruses - 0;…	15.82	13.38	32.74	20.44	6.47	415.26	459.72	774.33	550.04	113.16	26.91	14.93	58.92	*	11.52	21.7	30.85	21.2	5.9	229.61	227.69	473.45	310.11	81.84	14.62	7.42	29.58	*	50.3014	0.5	0	0	0	0
AT5G64570	AT5G64570_at	XYL4, ATBXL4	chr5:25810115-25813335 REVERSE LENGTH=2493	beta-D-xylosidase 4	62.54	71.31	80.71	71.08	7.94	1191.03	1599.08	1191.02	1329.23	143.07	18.7	14.46	24.25	*	58.15	115.53	140.98	104.43	25.32	1031.22	984.96	1234.77	1082.01	80.74	10.36	7.22	17.42	*	50.0692	0.86	0	0	0	0
AT4G35770	AT4G35770_at	SEN1, ATSEN1, DIN1	chr4:16944941-16946192 FORWARD LENGTH=890	Rhodanese/Cell cycle control phosphatase superfamily protein	10.98	15.39	13.61	13.1	2.2	2154.33	1810.09	2454.15	2138.84	186.91	163.29	122.21	231.27	*	8.28	11.72	18.03	12.59	3.15	1146.49	970.13	1817.31	1311.34	258.45	104.12	61.85	188.83	*	49.3904	-0.65	0	0	0	0
AT4G30670	AT4G30670_at		chr4:14957358-14957962 REVERSE LENGTH=605	Putative membrane lipoprotein	12.83	9.23	11.04	10.88	1.41	27.59	89.14	83.44	66.63	20.5	6.13	2.96	9.87	*	9.87	5.81	9.94	8.51	1.45	18.31	16.04	33.81	22.71	5.63	2.67	1.5	4.29	*	49.3243	-0.9	0	0	0	0
AT3G06850	AT3G06850_at	BCE2, LTA1, DIN3	chr3:2157974-2160613 REVERSE LENGTH=1730	2-oxoacid dehydrogenases acyltransferase family protein	106.13	82.89	112.55	100.32	9.39	360.79	351.59	619.76	443.82	88.62	4.42	2.9	6.16	*	127.68	117.04	140.72	127.69	8	239.34	189.17	272.07	232.81	24.78	1.82	1.47	2.22	*	49.3103	1.06	0	0	0	0
AT3G04060	AT3G04060_at	anac046, NAC046	chr3:1053366-1055163 REVERSE LENGTH=1487	NAC domain containing protein 46	33.87	49.73	32.7	38.3	6.26	70.88	91.47	99.84	87.48	9.57	2.28	1.67	3.25	*	23.81	46.36	36.32	35.39	6.98	37.2	45.29	41.28	41.42	3.41	1.17	0.85	1.76	0	49.1018	-0.71	0	0	0	0
AT2G19800	AT2G19800_at	MIOX2	chr2:8530896-8533508 REVERSE LENGTH=1318	myo-inositol oxygenase 2	835.02	516.54	598.94	649.67	95.14	1818.76	1927.53	2130.08	1960.08	96	3.02	2.39	4.01	*	548.46	310.68	845.42	567.58	155.49	1219.93	830.16	1139.31	1061.46	119.38	1.87	1.22	3.47	*	48.954	-0.72	0	0	0	0
AT5G04220	AT5G04220_at	SYTC, ATSYTC, NTMC2TYPE1.3, NTMC2T1.3, SYT3	chr5:1155865-1158876 REVERSE LENGTH=1999	Calcium-dependent lipid-binding (CaLB domain) family protein	29.08	22.72	30.47	27.58	3.08	154.06	137.03	113.92	134.98	11.84	4.89	3.89	6.24	*	22.02	22.48	26.86	23.66	2.4	51.44	56.9	62.88	57.16	3.93	2.42	1.99	2.98	*	48.8432	-0.9	0	0	0	0
AT4G39070	AT4G39070_at		chr4:18204855-18206509 REVERSE LENGTH=1023	B-box zinc finger family protein	33.68	43.14	27.61	34.73	5.37	334.9	248.82	459.25	347.53	61.3	10.01	6.65	14.75	*	34.43	21.33	37.63	31.19	5.05	138.67	127.57	220.24	162.31	29.38	5.2	3.41	7.79	*	48.7218	-0.76	0	0	0	0
AT5G63620	AT5G63620_at		chr5:25466128-25468393 REVERSE LENGTH=1633	GroES-like zinc-binding alcohol dehydrogenase family protein	33.14	23.63	37.89	31.33	4.57	147.28	163.22	181.64	163.82	10.63	5.23	4.1	7	*	25.62	38.02	48.1	37.17	6.83	99.4	98.35	113.94	104.11	5.95	2.8	2.11	4.05	*	48.5366	0.78	0	0	0	0
AT3G13450	AT3G13450_at	DIN4	chr3:4382198-4384436 REVERSE LENGTH=1360	Transketolase family protein	62.62	42.6	60.79	54.99	7.52	557.38	401.32	608.13	522.34	62.63	9.5	7.05	12.97	*	54.37	63.14	66.37	62.33	7.59	288.6	261.34	416.83	321.27	49.67	5.15	3.65	7.09	*	48.227	0.84	0	0	0	0
AT1G27100	AT1G27100_at		chr1:9407125-9411172 REVERSE LENGTH=2090	Actin cross-linking protein	90.85	83.66	109.72	95.29	8.57	187.73	188.82	272.81	216.11	28.72	2.27	1.71	2.93	*	74.48	133.08	132.86	113.61	20.49	113.8	142.3	171.95	142.53	17.46	1.25	0.89	1.86	0	47.9532	0.82	0	0	0	0
AT1G57990	AT1G57990_at	ATPUP18, PUP18	chr1:21441505-21442920 REVERSE LENGTH=1416	purine permease 18	15.96	27.89	11.41	18.38	5.45	98	73.64	179.69	117.08	32.24	6.37	3.11	13.61	*	14.91	40.29	43.74	32.85	9.52	62.9	95.41	97.08	85.18	11.69	2.59	1.62	5.09	*	47.91	0.84	0	0	0	0
AT3G47800	AT3G47800_at		chr3:17634810-17637204 FORWARD LENGTH=1444	Galactose mutarotase-like superfamily protein	196.27	162.09	254.35	204.76	27.23	478.12	485.08	440.65	468.51	16.07	2.29	1.86	2.95	*	160.05	398.9	391.59	316.61	79.31	410.19	487.19	430.69	442.18	24.98	1.4	0.97	2.39	0	47.8495	0.88	0	0	0	0
AT3G10450	AT3G10450_at	SCPL7	chr3:3249526-3252506 FORWARD LENGTH=1518	serine carboxypeptidase-like 7	44.37	24.46	24.48	30.97	7.33	148.68	54.38	124.23	108.74	28.5	3.51	1.84	6.44	*	26.59	40.8	27.64	31.53	5.56	43.44	33.39	45.62	41.4	4	1.31	0.96	1.9	0	47.8261	0.63	0	0	0	0
AT2G38400	AT2G38400_at	AGT3	chr2:16083689-16086349 FORWARD LENGTH=1899	alanine:glyoxylate aminotransferase 3	27	36.19	19.99	27.66	5.14	119.95	94.75	162.83	125.84	19.92	4.55	3.04	6.99	*	33.06	31.74	24.86	29.86	2.94	51.92	57.57	63.1	57.29	3.76	1.92	1.59	2.35	*	47.6974	0.78	0	0	0	0
AT4G32870	AT4G32870_at		chr4:15862143-15862741 FORWARD LENGTH=599	Polyketide cyclase/dehydrase and lipid transport superfamily protein	19.34	24.76	22.26	22.28	2.42	46.33	49.49	64.31	53.25	6.15	2.39	1.83	3.11	*	17.93	21.73	20.45	19.92	1.92	21.92	23.47	28.08	24.21	2.43	1.22	0.96	1.53	0	47.541	-0.88	0	0	0	0
AT2G45170	AT2G45170_at	ATATG8E, ATG8E	chr2:18624264-18625717 FORWARD LENGTH=683	AUTOPHAGY 8E	39.28	42.16	72.36	50.98	10.86	719.41	678.38	924.5	774.12	76.3	15.18	10.7	23.92	*	15.9	38.41	82.68	45.21	20.03	385.05	425.28	580.08	463.43	59.72	10.25	5.62	38.09	*	47.4766	-0.56	0	0.272	0	0
AT2G22980	AT2G22980_at	SCPL13	chr2:9778877-9783169 FORWARD LENGTH=1642	serine carboxypeptidase-like 13	59.65	35.08	96.75	63.28	18.52	213.73	172.06	203.99	196.97	12.63	3.11	2.07	6.04	*	29.18	130.7	184.41	114.64	45.89	196.26	246.71	194.62	212.61	17.68	1.85	1.09	5.46	0	47.343	0.59	0	0	0	0
AT3G51730	AT3G51730_at		chr3:19186666-19188691 FORWARD LENGTH=1100	saposin B domain-containing protein	525.54	501.27	464.43	495.15	21.89	1529.41	1643.67	1792.63	1657.23	81.69	3.35	3	3.73	*	472.17	711.3	720.63	634.6	84.32	1152.66	1236.46	1358.44	1250.27	66.25	1.97	1.58	2.55	*	47.3333	0.99	0	0	0	0
AT4G38470	AT4G38470_at		chr4:17999432-18003681 FORWARD LENGTH=1858	ACT-like protein tyrosine kinase family protein	105.06	93.99	120.46	108.17	9.26	526.36	845.13	864.63	745.39	111	6.89	5.06	9	*	114.48	175.43	193.18	160.93	24.91	596.24	488.54	568.26	550.76	32.5	3.42	2.67	4.65	*	47.2332	1.08	0	0	0	0
AT1G75220	AT1G75220_at		chr1:28229157-28232831 REVERSE LENGTH=1944	Major facilitator superfamily protein	274.84	368.02	373.09	337.22	35.55	950.28	1091.52	1092.47	1045	51.62	3.1	2.58	3.81	*	240.82	505.28	390.88	378.31	79.16	730	630.39	778.84	713.42	44.83	1.89	1.37	2.9	*	46.8992	0.72	0	0	0	0
AT3G25690	AT3G25690_at	CHUP1	chr3:9353010-9357953 FORWARD LENGTH=2995	Hydroxyproline-rich glycoprotein family protein	66.97	47.9	55.8	57.1	6.08	147.56	134.78	90.44	124.56	17.74	2.18	1.6	2.9	*	102.07	165.04	171.86	146.25	22.67	191.59	177.99	133.38	167.64	17.95	1.15	0.85	1.6	0	46.875	1.83	*	0	0	0
AT3G56000	AT3G56000_at	ATCSLA14, CSLA14	chr3:20783318-20785796 REVERSE LENGTH=1864	cellulose synthase like A14	22.3	26.52	20.13	23.01	2.26	59.2	46.11	46.18	50.51	4.54	2.19	1.76	2.74	*	13.6	24.22	21.73	19.8	3.44	24.84	31.31	22.01	26.1	3.22	1.32	0.94	1.93	0	46.5909	-0.85	0	0	0	0
AT3G61160	AT3G61160_at		chr3:22635881-22638817 FORWARD LENGTH=1848	Protein kinase superfamily protein	28.76	22.02	23.79	24.26	3.04	168.36	174.91	152.59	164.76	7.88	6.79	5.53	8.65	*	16.56	30.24	27.01	24.71	4.9	86.42	130.41	100.96	105.88	13.7	4.29	2.96	6.63	*	46.4738	0.66	0	0	0	0
AT3G16220	AT3G16220_at		chr3:5497597-5499235 FORWARD LENGTH=1057	Predicted eukaryotic LigT	38.39	41.74	42.99	40.95	2.93	89.11	96.67	85.97	90.7	4.75	2.21	1.92	2.57	*	51.2	72.84	65.47	62.98	7.05	75.31	77.44	82.3	78.11	3.31	1.24	1.03	1.54	0	46.3542	1.22	*	0	0	0
AT1G71697	AT1G71697_at	ATCK1, CK, CK1	chr1:26971223-26973464 FORWARD LENGTH=1642	choline kinase 1	25.92	40.8	29.5	32.13	4.78	95.35	85.22	104.46	94.79	5.84	2.95	2.31	3.96	*	25.51	52.21	52.74	43.48	9.19	64.37	82.37	79.43	75.4	6.21	1.73	1.24	2.7	*	46.3203	0.84	0	0	0	0
AT2G30600	AT2G30600_at		chr2:13036876-13041684 FORWARD LENGTH=2707	BTB/POZ domain-containing protein	214.48	177.54	177.96	190.33	12.78	630.98	608.68	513.37	584.22	36.7	3.07	2.64	3.58	*	237.17	272.74	335.86	281.5	29.62	561.09	444.29	473.45	493.12	34.95	1.75	1.43	2.18	*	45.8333	1.19	0	0	0	0
AT5G01600	AT5G01600_at	ATFER1, FER1	chr5:227953-230051 REVERSE LENGTH=1421	ferretin 1	36.61	18.71	38.25	31.29	6.44	142.78	59.44	215.28	139.17	44.93	4.45	1.99	8.06	*	37.19	45.46	77.61	53.29	12.71	74.27	86.95	158.23	106.48	26.31	2	1.08	3.64	0	45.7286	0.96	0	0	3.171	2.172
AT2G02710	AT2G02710_at	PLP, PLPA	chr2:758694-761013 REVERSE LENGTH=1717	PAS/LOV protein B	19.59	16.16	18.43	18.07	1.67	197.04	193.53	254.87	215.26	20.26	11.91	9.56	14.82	*	14.4	20.93	32.08	22.48	5.49	179.4	146.77	174.62	166.88	10.78	7.42	5.19	12.52	*	45.7113	0.73	0	0	0	0
AT5G05140	AT5G05140_at		chr5:1519913-1522667 FORWARD LENGTH=2121	Transcription elongation factor (TFIIS) family protein	52.09	50.94	36.22	46.4	5.67	182.44	164.35	158.7	168.51	8.29	3.63	2.97	4.6	*	67.82	78.38	76.01	73.92	4.2	133.31	126.33	141.92	134.08	5.73	1.81	1.62	2.04	*	45.4545	1.29	*	0	0	0
AT5G51970	AT5G51970_at		chr5:21111445-21113403 FORWARD LENGTH=1589	GroES-like zinc-binding alcohol dehydrogenase family protein	66.3	40.24	84.97	63.83	13.02	237.8	149.46	224.76	204.02	27.37	3.2	2.18	5.02	*	22.89	71.59	92.32	62.21	20.81	113.46	99.81	158.54	123.95	17.93	1.99	1.19	4.53	0	45.4128	-0.56	0	0	0	0
AT1G15740	AT1G15740_at		chr1:5410908-5414919 FORWARD LENGTH=2295	Leucine-rich repeat family protein	109.74	121.91	108.8	113.4	6.07	509.37	610.4	466.8	529.4	44.04	4.67	3.94	5.47	*	128.32	261.81	253.75	214.41	43.97	598.54	771.45	580.39	650.21	62.18	3.03	2.16	4.68	*	45.1777	1.24	*	0	0	0
AT1G54740	AT1G54740_at		chr1:20430769-20431986 FORWARD LENGTH=1218	Protein of unknown function (DUF3049)	24.74	23.11	37.9	28.32	5.25	264.07	275.54	342.71	294.09	24.9	10.39	7.64	15.26	*	22.21	25.74	28.27	25.43	2.51	136.63	117.34	197.53	150.27	24.38	5.91	4.19	7.95	*	45.1571	-0.75	0	0	0	0.542
AT5G35790	AT5G35790_at	G6PD1	chr5:13956690-13959753 REVERSE LENGTH=1987	glucose-6-phosphate dehydrogenase 1	82.22	59.83	94	78.65	10.18	132.78	132.41	112.39	126.02	7.92	1.6	1.28	2.07	*	50.16	133.65	144.27	109.26	30.12	123.51	111.63	108.06	114.37	5.28	1.05	0.71	1.92	0	44.5313	0.74	0	0	0	0
AT1G35580	AT1G35580_at	CINV1	chr1:13122204-13125264 REVERSE LENGTH=2066	cytosolic invertase 1	37.69	37.66	59.29	44.75	7.51	193.9	177.79	237.87	203.18	18.56	4.54	3.38	6.45	*	28.71	54.51	61.46	47.96	10.45	105.07	135.28	151.11	130.15	14.26	2.71	1.88	4.35	*	44.3787	0.65	0	0	0	0
AT3G45730	AT3G45730_at		chr3:16789980-16790582 FORWARD LENGTH=603	unknown protein; Has 3 Blast hits to 3 proteins in 1 species: Archae - 0; Bacteria - 0; Metazoa - 0; Fungi - 0; Plants - 3; Viruses - 0; Other Eukaryotes - 0 (source: NCBI BLink).	83.79	76.31	88.8	83.02	4.32	482.62	525.95	546.95	518.29	20.33	6.24	5.62	6.96	*	23.93	40.63	92.22	52.1	20.75	250.09	261.56	313.23	274.88	20.28	5.28	3.13	15.36	*	44.306	-0.95	0	0	0	0
AT1G54410	AT1G54410_at		chr1:20309775-20310767 REVERSE LENGTH=728	dehydrin family protein	87.21	69.99	82.1	79.47	5.8	201.29	151.61	168.79	173.09	15.01	2.18	1.8	2.62	*	121.8	126.81	184.68	144.28	20.47	175.76	188.3	177.75	181.37	6.71	1.26	1.01	1.65	0	43.8889	1.36	*	0	0	0
AT5G21170	AT5G21170_at	AKINBETA1	chr5:7205562-7208496 FORWARD LENGTH=1265	5'-AMP-activated protein kinase beta-2 subunit protein	65.63	70.14	88.2	74.67	7.57	1324.31	1385.03	1644.58	1447.1	103.1	19.38	15.89	23.98	*	35.76	88.69	122.34	82	25.75	1105.11	1016.95	1283.6	1135.23	82.41	13.84	8.94	28.83	*	43.7382	0.52	0	0	0	0
AT1G72300	AT1G72300_at		chr1:27217477-27221123 REVERSE LENGTH=3647	Leucine-rich receptor-like protein kinase family protein	54.74	53.62	38.24	48.47	5.91	114.63	147.12	116.93	126.24	11.13	2.6	2.05	3.38	*	44.6	82.58	74.96	67.24	12.06	104.93	99.84	98.35	101.5	3.06	1.51	1.16	2.15	0	43.4146	0.94	0	0	0	0
AT4G34030	AT4G34030_at	MCCB	chr4:16301179-16304099 FORWARD LENGTH=2033	3-methylcrotonyl-CoA carboxylase	34.56	40.53	35.37	36.81	3.32	144.26	126.8	197.78	156.18	21.79	4.24	3.16	5.51	*	37.35	41.99	51.68	43.6	4.75	95.78	85.04	119.44	100	10.42	2.29	1.79	2.95	*	43.3544	0.93	0	0	0	0
AT1G07040	AT1G07040_at		chr1:2160938-2163308 REVERSE LENGTH=1676	unknown protein; INVOLVED IN: biological_process unknown; LOCATED IN: chloroplast; EXPRESSED IN: 24 plant structures; EXPRESSED DURING: 14 growth stages; BEST Arabidopsis thaliana protein match is: unknown protein (TAIR:AT1G27030.1); Has 540 Blast hits to 538 proteins in 187 species: Archae - 0; Bacteria - 333; Metazoa - 0; Fungi - 0; Plants - 67; Viruses - 0; Other Eukaryotes - 140 (source: NCBI…	91.92	86.78	68.33	82.14	8.02	446.01	407.01	569.3	473.84	50.11	5.77	4.53	7.31	*	111.47	139.7	150.39	133.35	13.27	406.61	389.66	577.12	457.72	60.6	3.43	2.57	4.48	*	43.2671	1.29	*	0	0	0
AT4G10920	AT4G10920_at	KELP	chr4:6696712-6699199 REVERSE LENGTH=1208	transcriptional coactivator p15 (PC4) family protein (KELP)	81.69	77.66	82.32	80.56	2.87	115.1	125.57	125.39	122.39	4.89	1.52	1.39	1.66	*	53.63	99.97	114.9	89.39	18.82	86.08	95.39	115.76	99.15	9.14	1.11	0.79	1.73	0	43.1655	0.72	0	0	0	0
AT1G54100	AT1G54100_at	ALDH7B4	chr1:20195264-20198973 REVERSE LENGTH=1818	aldehyde dehydrogenase 7B4	67.72	111.84	56.84	78.67	17.37	400.06	282.57	392.58	358.3	37.99	4.55	3.16	7.33	*	172.58	110.83	117.63	133.81	19.46	309.15	278.47	342.6	310.09	18.92	2.32	1.82	3.09	*	42.4051	1.12	0	0	0	0
AT1G24440	AT1G24440_at		chr1:8662019-8663964 FORWARD LENGTH=1264	RING/U-box superfamily protein	60.88	57.67	67.94	62.32	3.86	160.03	145.27	126.04	144.13	10.56	2.31	1.97	2.7	*	35.85	64.18	67.58	55.67	10.54	81.58	79.83	93.38	85	4.83	1.53	1.14	2.24	0	42.132	-0.84	0	0	0	0
AT2G04690	AT2G04690_at		chr2:1644497-1646351 FORWARD LENGTH=971	Pyridoxamine 5'-phosphate oxidase family protein	95.11	113.27	96.81	101.61	6.86	264.03	311.26	406.07	327.09	42.35	3.22	2.48	4.04	*	96.26	145.63	171.73	137.73	22.55	260.51	225.62	331.94	272.6	31.54	1.98	1.44	2.83	*	41.9355	0.97	0	0	0	0
AT1G06570	AT1G06570_at	PDS1, HPD	chr1:2011885-2013545 REVERSE LENGTH=1547	phytoene desaturation 1	86.81	101.97	81.92	90.2	6.96	519.79	444.77	682.12	548.38	70.8	6.08	4.66	7.7	*	124.38	56.4	81.35	87.21	19.87	279.81	348.14	452.01	359.3	51.56	4.12	2.71	6.87	*	41.8455	-0.73	0	0	0	0
AT2G28120	AT2G28120_at		chr2:11985687-11987738 FORWARD LENGTH=2052	Major facilitator superfamily protein	24.04	44.78	24.83	31.33	7.73	345.96	330.55	448.82	375.21	37.52	11.98	8.13	20.54	*	37.9	32.6	43.1	37.65	4.79	204.66	214.4	279.82	232.71	24.41	6.18	4.73	8.2	*	41.8204	0.79	0	0	0	0
AT1G44770	AT1G44770_at		chr1:16907539-16909495 REVERSE LENGTH=1197	unknown protein; BEST Arabidopsis thaliana protein match is: unknown protein (TAIR:AT5G49710.3); Has 81 Blast hits to 81 proteins in 17 species: Archae - 0; Bacteria - 0; Metazoa - 0; Fungi - 0; Plants - 81; Viruses - 0; Other Eukaryotes - 0 (source: NCBI BLink).	45.81	45.07	41.62	44.08	2.41	122.2	155.49	148.88	142	11.15	3.22	2.74	3.76	*	31.53	55	58.65	48.29	8.89	91.53	105.85	114.67	103.88	7.44	2.15	1.6	3.13	*	41.6058	0.76	0	0	0	0
AT1G72360	AT1G72360_at	HRE1	chr1:27241807-27242827 FORWARD LENGTH=930	Integrase-type DNA-binding superfamily protein	5.2	5.06	5.23	5.15	0.58	16.23	22.45	27.89	22.19	3.56	4.3	3.04	5.88	*	3.81	4.33	5.78	4.54	0.83	10.81	11.17	10.28	10.79	0.69	2.38	1.78	3.43	*	41.4474	-0.81	0	0	0	0
AT5G37740	AT5G37740_at		chr5:14992005-14993671 FORWARD LENGTH=890	Calcium-dependent lipid-binding (CaLB domain) family protein	37.42	51.29	44.74	44.44	4.34	97.12	92.1	92.37	93.87	2.42	2.11	1.81	2.53	*	44.18	44.73	68.91	52.53	8.25	65.94	68.6	88.21	74.24	7.25	1.41	1.06	1.97	0	41.4365	0.85	0	0	0	0
AT1G11260	AT1G11260_at	STP1, ATSTP1	chr1:3777328-3780337 FORWARD LENGTH=1905	sugar transporter 1	98.81	103.26	106.07	102.85	6.92	1701.8	1667.5	1870.62	1744.91	68.95	16.97	14.97	19.38	*	94.05	138.49	128.54	120.74	15.31	1210.91	1306.12	1399.81	1306.38	62.5	10.82	8.8	13.83	*	41.2158	0.91	0	0.457	0	0.667
AT1G28260	AT1G28260_at		chr1:9875600-9879174 REVERSE LENGTH=3211	Telomerase activating protein Est1	9.78	17.01	9.5	12.16	2.82	61.84	58.68	69.93	63.36	4.3	5.21	3.69	8.51	*	16.41	28.52	29.18	24.61	4.54	69.28	67.23	77.48	71.33	4.46	2.9	2.17	4.21	*	41.1924	1.25	*	0	0	0
AT5G10695	AT5G10695_at		chr5:3377663-3378221 FORWARD LENGTH=559	unknown protein; BEST Arabidopsis thaliana protein match is: unknown protein (TAIR:AT5G57123.1); Has 30201 Blast hits to 17322 proteins in 780 species: Archae - 12; Bacteria - 1396; Metazoa - 17338; Fungi - 3422; Plants - 5037; Viruses - 0; Other Eukaryotes - 2996 (source: NCBI BLink).	58.54	61.06	39.92	53.57	7.35	91.95	140.55	173.88	135.48	24.18	2.53	1.69	3.64	*	30.54	108.36	69.31	69.33	22.85	87.6	117.78	132.57	112.57	13.6	1.62	1	3.6	0	40.8284	0.58	0	0	0	0
AT3G26890	AT3G26890_at		chr3:9907262-9911616 REVERSE LENGTH=2747	unknown protein; BEST Arabidopsis thaliana protein match is: unknown protein (TAIR:AT5G41110.1); Has 35333 Blast hits to 34131 proteins in 2444 species: Archae - 798; Bacteria - 22429; Metazoa - 974; Fungi - 991; Plants - 531; Viruses - 0; Other Eukaryotes - 9610 (source: NCBI BLink).	33.8	40.19	32.1	35.32	3.07	162.71	154.57	137.29	151.97	8.29	4.3	3.65	5.13	*	46.77	74.16	74.06	64.9	9.53	175.69	188.44	167.83	177.41	7.35	2.73	2.18	3.63	*	40.274	1.35	*	0	0	0
AT5G07440	AT5G07440_at	GDH2	chr5:2355937-2358194 FORWARD LENGTH=1634	glutamate dehydrogenase 2	119.08	220.73	114.57	151.22	35.58	386.49	557.07	597.43	513.76	66.67	3.4	2.26	5.73	*	224.58	295.66	356.55	292.32	39.02	558.06	432.21	506.79	498.93	36.49	1.71	1.35	2.24	*	40.2655	1.28	*	0	0	0
AT3G47160	AT3G47160_at		chr3:17359988-17362118 REVERSE LENGTH=1227	RING/U-box superfamily protein	58.21	60.63	77.21	64.97	6.89	132.58	155.69	229.68	172.66	29.85	2.66	1.84	3.65	*	26.19	76.46	93.59	65.36	20.6	93.29	116.55	136.9	115.39	13.15	1.77	1.1	3.72	0	40.2174	0.48	0	0	0	0
AT1G68110	AT1G68110_at		chr1:25524718-25526150 FORWARD LENGTH=1433	ENTH/ANTH/VHS superfamily protein	9.67	10.72	8.36	9.51	1.21	40.58	35.99	41.65	39.47	2.13	4.15	3.36	5.32	*	7.52	9.52	9.51	8.86	1.04	25.74	18.97	23.41	22.66	2.13	2.56	2.01	3.31	*	40.1786	-0.8	0	0	0	0
AT4G28290	AT4G28290_at		chr4:14011844-14012583 REVERSE LENGTH=550	unknown protein; FUNCTIONS IN: molecular_function unknown; INVOLVED IN: biological_process unknown; LOCATED IN: chloroplast; EXPRESSED IN: 23 plant structures; EXPRESSED DURING: 15 growth stages; Has 45 Blast hits to 45 proteins in 11 species: Archae - 0; Bacteria - 0; Metazoa - 0; Fungi - 0; Plants - 45; Viruses - 0; Other Eukaryotes - 0 (source: NCBI BLink).	110.35	100.63	111.67	108.01	4.89	184.01	190.18	312.78	229	42.28	2.12	1.47	2.8	*	66.1	51.76	85.1	67.76	9.87	78.67	75.16	140.78	98.14	21.57	1.45	0.88	2.19	0	40.1361	-1.27	*	0	0	0
AT3G29035	AT3G29035_at	ATNAC3, ANAC059, NAC3	chr3:11033665-11035308 FORWARD LENGTH=1433	NAC domain containing protein 3	8.23	8.88	7.82	8.28	2.06	100.26	148.25	92.8	113.69	18.17	13.73	8.67	24.31	*	7.64	8.83	9.1	8.53	1.95	59.6	78.01	56.74	64.89	7.36	7.61	5.2	12.51	*	40.0231	0.58	0	0	0	0
AT3G02140	AT3G02140_at	TMAC2, AFP4	chr3:385317-386538 REVERSE LENGTH=1222	AFP2 (ABI five-binding protein 2) family protein	26.56	26.8	12.35	21.71	5.13	70.99	69.24	79.79	73.24	3.92	3.37	2.4	5.55	*	9.77	10.15	13.32	11.1	1.52	21.63	18.34	21.18	20.4	1.59	1.84	1.44	2.43	*	40	-1.15	0	0	0	0
AT5G16940	AT5G16940_at		chr5:5571550-5572390 REVERSE LENGTH=742	carbon-sulfur lyases	19.47	18.61	19.24	19.04	1.19	31.89	31.95	36.72	33.55	2.44	1.76	1.5	2.06	*	15.27	34.36	22.89	24.18	5.82	32.27	31.49	28.37	30.67	1.66	1.27	0.9	2.11	0	40	0.76	0	0	0	0
AT3G25900	AT3G25900_at	HMT-1, ATHMT-1	chr3:9480833-9482926 FORWARD LENGTH=1354	Homocysteine S-methyltransferase family protein	19.11	16.45	19.1	18.3	1.74	57.61	37.02	77.77	57.44	11.94	3.14	2.02	4.42	*	27.18	18.23	18.53	21.3	3.13	34.65	29.16	45.47	36.29	5	1.7	1.22	2.4	*	39.604	0.85	0	0	0	0
AT5G54080	AT5G54080_at	HGO	chr5:21945869-21948285 FORWARD LENGTH=1652	homogentisate 1,2-dioxygenase	109.13	129.94	122.41	120.01	8.29	1395.85	1068.41	1428.98	1297.15	115.4	10.81	8.93	12.97	*	99.63	132.8	145.61	125.94	14.65	741.51	891.54	1193.73	942.53	134.11	7.48	5.45	10.09	*	38.9698	0.83	0	0	0	0
AT1G80160	AT1G80160_at		chr1:30151003-30152190 FORWARD LENGTH=862	Lactoylglutathione lyase / glyoxalase I family protein	16.97	11.16	8.26	12.08	2.93	174.21	243.53	532.53	316.81	109.9	26.22	10.67	51.73	*	12.16	21.7	25.29	19.73	4.23	154.76	179.71	213.6	182.7	17.81	9.26	6.52	14.63	*	38.8941	0.94	0	0	0	0
AT1G09430	AT1G09430_at	ACLA-3	chr1:3041996-3045402 FORWARD LENGTH=1838	ATP-citrate lyase A-3	120.55	139.07	102.39	120.22	11.8	439.1	373.28	411.51	407.53	19.74	3.39	2.86	4.11	*	111.66	164.66	152.04	142.57	16.99	303.53	278.18	347.87	309.96	21.21	2.17	1.75	2.77	*	38.8112	0.91	0	0	0	0
AT4G28270	AT4G28270_at	ATRMA2, RMA2	chr4:14007539-14009019 REVERSE LENGTH=880	RING membrane-anchor 2	169.02	169.37	216.65	185.13	16.34	315.69	261.2	297.13	291.62	16.1	1.58	1.33	1.88	*	80.41	173.58	210.72	154.7	39.31	179.04	169.18	190.96	180.36	7.06	1.17	0.82	2.01	0	38.3459	-0.81	0	0	0	0
AT4G02075	AT4G02075_at	PIT1	chr4:913419-916476 REVERSE LENGTH=855	RING/FYVE/PHD zinc finger superfamily protein	81.4	42.98	86.85	70.13	14.15	217.56	184.7	233.49	211.7	15.3	3.02	2.2	4.58	*	24.36	48.17	66.54	46.31	12.54	86.97	84.85	119.65	96.99	11.64	2.09	1.36	3.87	*	38.1818	-0.88	0	0	0	0
AT4G36400	AT4G36400_at		chr4:17197212-17200907 FORWARD LENGTH=1992	FAD-linked oxidases family protein	35.63	41.16	28.83	34.88	4.42	122.35	86.3	74.14	94.15	14.63	2.7	1.9	3.74	*	59.33	81.19	64.8	68.62	7.29	104.16	109.64	86.15	100.13	7.87	1.46	1.18	1.83	0	37.8947	1.5	*	0	0	0
AT3G14595	AT3G14595_at		chr3:4908948-4910476 FORWARD LENGTH=738	Ribosomal protein L18ae family	69.74	64.47	68.01	67.34	3.28	155.26	208.94	225.57	196.47	22.03	2.92	2.35	3.53	*	56.18	76.12	79.66	70.46	7.96	137.76	107.16	168.28	137.7	17.82	1.95	1.46	2.59	*	37.8723	0.84	0	0	0	0
AT3G20340	AT3G20340_at		chr3:7092900-7093501 REVERSE LENGTH=602	Expression of the gene is downregulated in the presence of paraquat, an inducer of photoxidative stress.	9.32	10.07	7.44	8.85	1.21	27.92	17.98	42.88	29.57	7.27	3.34	1.92	5.12	*	6.74	8.01	7.06	7.28	0.79	11.02	10.26	15.91	12.36	2	1.7	1.2	2.31	0	37.5	-0.9	0	0	0	0
AT5G24490	AT5G24490_at		chr5:8365601-8367460 FORWARD LENGTH=1298	30S ribosomal protein, putative	135.29	58.77	156.01	116.03	30.1	859.02	749.21	755.59	786.85	37.46	6.78	4.7	11.88	*	50.24	233.47	285.99	189.54	72.19	975.03	793.93	1004.24	924.19	66.31	4.88	2.94	13.11	*	37.4468	0.58	0	0	0	0
AT5G61210	AT5G61210_at	SNAP33, ATSNAP33, SNP33, ATSNAP33B	chr5:24623299-24625631 FORWARD LENGTH=1472	soluble N-ethylmaleimide-sensitive factor adaptor protein 33	182.31	196.27	162.69	180.25	11.23	360.49	311.51	307.06	326.43	18.18	1.81	1.58	2.08	*	214.5	294.9	261.41	256.63	24.73	283.38	321.05	294.82	298.73	13.4	1.16	0.99	1.4	0	37.3418	1.17	0	0	2.399	0
AT5G59400	AT5G59400_at		chr5:23957745-23959632 FORWARD LENGTH=1031	FUNCTIONS IN: molecular_function unknown; INVOLVED IN: biological_process unknown; LOCATED IN: chloroplast; EXPRESSED IN: 23 plant structures; EXPRESSED DURING: 13 growth stages; BEST Arabidopsis thaliana protein match is: PGR5-like B (TAIR:AT4G11960.1); Has 30201 Blast hits to 17322 proteins in 780 species: Archae - 12; Bacteria - 1396; Metazoa - 17338; Fungi - 3422; Plants - 5037; Viruses - 0; …	14.53	12.78	18	14.87	2.01	35.64	34.58	33.23	34.51	2.05	2.32	1.85	3.03	*	10.45	12.35	14.05	12.19	1.42	16.16	19.44	29.61	21.68	4.31	1.78	1.16	2.54	0	37.2973	-0.9	0	0	0	0
AT3G15770	AT3G15770_at		chr3:5340074-5341339 FORWARD LENGTH=778	unknown protein; BEST Arabidopsis thaliana protein match is: unknown protein (TAIR:AT1G15350.1); Has 35333 Blast hits to 34131 proteins in 2444 species: Archae - 798; Bacteria - 22429; Metazoa - 974; Fungi - 991; Plants - 531; Viruses - 0; Other Eukaryotes - 9610 (source: NCBI BLink).	30.83	41.17	45.02	38.89	5.08	375.38	386.77	374.13	378.67	8.67	9.74	7.98	12.43	*	22.1	32.24	32.2	28.8	4.13	161.53	187.24	227.85	191.94	20.19	6.66	5.01	9.1	*	37.218	-0.98	0	0	0	0
AT1G06760	AT1G06760_at		chr1:2076504-2077698 REVERSE LENGTH=1090	winged-helix DNA-binding transcription factor family protein	170.97	174.03	176.71	173.25	5.84	545.02	501.86	525.88	524.24	16.68	3.03	2.8	3.27	*	180.28	224.82	210.61	204.9	14.53	367.6	490.85	449.46	435.76	37.92	2.13	1.76	2.55	*	37.1429	1.03	0	0	0	0
AT4G16520	AT4G16520_at	ATG8F	chr4:9306663-9308462 REVERSE LENGTH=713	Ubiquitin-like superfamily protein	359.58	370.32	470.44	401.01	37.19	1527.65	1307.86	1316.15	1382.45	73.99	3.45	2.91	4.15	*	255.98	566.9	557.34	459.3	104.98	1073.57	1223.55	1225.62	1173.88	57.09	2.56	1.84	4.12	*	36.7698	0.7	0	0.583	0	0
AT4G26290	AT4G26290_at		chr4:13307595-13307822 REVERSE LENGTH=228	unknown protein; Has 9 Blast hits to 9 proteins in 5 species: Archae - 0; Bacteria - 0; Metazoa - 2; Fungi - 0; Plants - 3; Viruses - 0; Other Eukaryotes - 4 (source: NCBI BLink).	8.85	17.25	10.51	11.93	3.12	28.24	44.8	78.42	50.51	15.05	4.23	1.99	8.4	*	7.35	11.93	10.89	10.05	1.89	13.63	23.56	24.15	20.23	3.9	2.01	1.26	3.19	*	36.6834	-0.64	0	0	0	0
AT1G63800	AT1G63800_at	UBC5	chr1:23667616-23669080 REVERSE LENGTH=907	ubiquitin-conjugating enzyme 5	36.39	60.31	59.7	51.62	8.96	318.4	326.57	335.63	327.56	7.01	6.35	4.92	8.9	*	32.75	63.54	63.41	53.06	10.76	214.58	213.99	234.45	222.43	8.54	4.19	3.12	6.31	*	36.5854	0.64	0	0	0	0
AT5G59960	AT5G59960_at		chr5:24142014-24145333 REVERSE LENGTH=1611	unknown protein; FUNCTIONS IN: molecular_function unknown; INVOLVED IN: biological_process unknown; LOCATED IN: nucleus; EXPRESSED IN: 24 plant structures; EXPRESSED DURING: 15 growth stages; Has 30201 Blast hits to 17322 proteins in 780 species: Archae - 12; Bacteria - 1396; Metazoa - 17338; Fungi - 3422; Plants - 5037; Viruses - 0; Other Eukaryotes - 2996 (source: NCBI BLink).	72.61	72.26	102.5	82.25	10.61	269.63	302.52	307.35	292.12	14.76	3.55	2.87	4.56	*	67.14	132.35	148.56	115.75	25.67	286.37	288.7	289.82	287.99	6.68	2.49	1.82	3.92	*	36.5854	0.86	0	0	0	0
AT5G45110	AT5G45110_at	NPR3, ATNPR3	chr5:18228910-18231522 FORWARD LENGTH=2358	NPR1-like protein 3	67.55	96.94	46.62	70.21	15.12	147.95	127.31	144.17	139.4	7.32	1.99	1.45	3.1	*	91	192.54	122.62	135.31	30.53	166.75	191.64	160.21	173.08	10.75	1.28	0.92	2.05	0	36.5517	1.11	0	0	0	0
AT5G06570	AT5G06570_at		chr5:2007600-2011041 REVERSE LENGTH=1318	alpha/beta-Hydrolases superfamily protein	9.53	7.19	5.11	7.23	1.52	128.28	98.17	216.31	147.61	35.51	20.42	11.42	34.98	*	6.74	7.98	7.88	7.53	0.93	75.01	57.56	93.99	75.34	10.73	10.01	7.25	13.63	*	36.5149	0.72	0	0	0	0
AT3G56140	AT3G56140_at		chr3:20829282-20832871 FORWARD LENGTH=2565	Protein of unknown function (DUF399 and DUF3411)	55.56	50.91	58.79	55.08	3.3	142.13	141.73	173.25	153.25	11.86	2.78	2.36	3.26	*	65.19	71.1	81.39	72.48	5.42	128.37	117.68	165.24	136.91	15.05	1.89	1.5	2.34	*	36.4407	1.12	0	0	0	0
AT2G20670	AT2G20670_at		chr2:8911860-8913534 REVERSE LENGTH=1250	Protein of unknown function (DUF506)	19.4	21.89	31.92	24.17	4.75	589.86	562.46	739.68	630.78	56.09	26.1	18.89	39.41	*	15.77	23.28	31.11	23.4	5.19	347.33	384.21	541.47	424.34	60.86	18.14	12.01	29.82	*	36.4214	-0.63	0	0.238	0	0.553
AT2G15890	AT2G15890_at	MEE14	chr2:6920369-6922025 REVERSE LENGTH=1402	maternal effect embryo arrest 14	384.61	369.38	485.45	413.04	38.21	1442.5	1536.98	1658.7	1544.77	66.36	3.74	3.19	4.47	*	187.35	533.02	552.78	423.63	120.55	1148.3	1250.77	1494.77	1297.71	105.49	3.06	2.03	5.82	*	36.3636	0.54	0	0.263	0	0
AT5G38895	AT5G38895_at		chr5:15571254-15573416 FORWARD LENGTH=1059	RING/U-box superfamily protein	40.64	39.01	49.25	42.89	3.83	79.88	75.23	77.12	77.37	3.24	1.8	1.54	2.14	*	30.34	36.24	52.66	39.63	6.98	45.68	52.8	61.07	53.11	5.24	1.34	0.98	1.94	0	36.3636	-0.8	0	0	0	0
AT3G13750	AT3G13750_at	BGAL1	chr3:4510965-4516298 FORWARD LENGTH=3313	beta galactosidase 1	180.61	186.4	177.04	180.61	8.2	1503.16	1504.95	1358.82	1455.21	53.89	8.06	7.32	8.88	*	191.49	221.48	347.8	252.79	49.29	1479	1540.7	1722.58	1580.59	77.21	6.25	4.67	9.27	*	36.2022	0.95	0	0	0	0
AT5G57655	AT5G57655_at		chr5:23346760-23350039 FORWARD LENGTH=1938	xylose isomerase family protein	51.08	59.39	60.5	57.05	4.88	975.82	787.9	770.59	845.27	65.93	14.82	12.25	17.98	*	39.54	79.15	94.96	71.25	16.91	828.8	738.16	780.95	782.25	28.32	10.98	7.85	18.06	*	35.9184	0.75	0	0	0	0
AT2G45810	AT2G45810_at		chr2:18859599-18862918 FORWARD LENGTH=2329	DEA(D/H)-box RNA helicase family protein	152.52	150.05	151.36	151.41	5.01	344.29	309.11	286.4	312.77	18.39	2.07	1.84	2.3	*	144.39	206.64	226.6	192.58	26.27	281.47	287.89	267.82	279.39	9.22	1.45	1.18	1.88	0	35.8696	0.98	0	0	0	0
AT5G63020	AT5G63020_at		chr5:25283063-25286002 REVERSE LENGTH=2856	Disease resistance protein (CC-NBS-LRR class) family	45.04	43.47	35.42	41.62	3.71	80.97	90.37	63.12	77.95	8.91	1.87	1.46	2.37	*	58.13	97.92	89.14	81.65	12.52	110.85	105.6	84.47	100.27	8.53	1.23	0.94	1.69	0	35.6164	1.42	*	0	0	0
AT4G29950	AT4G29950_at		chr4:14657045-14660573 FORWARD LENGTH=3109	Ypt/Rab-GAP domain of gyp1p superfamily protein	80.23	93.24	100.27	90.74	7.26	328.54	298.17	324.14	315.77	14.27	3.48	3.01	4.08	*	74.3	101.29	117.89	97.65	13.17	242.55	211.85	324.62	259.43	34.23	2.66	1.94	3.65	*	35.5482	0.81	0	0	0	0
AT3G11560	AT3G11560_at		chr3:3639435-3643576 FORWARD LENGTH=2104	LETM1-like protein	133.12	115.36	94.39	114.13	11.66	314.67	275.38	219.87	270.28	27.98	2.37	1.86	3.02	*	188.67	261.45	258.08	235.92	24.48	360.44	367.04	303.74	343.73	20.97	1.46	1.2	1.8	*	35.4839	1.62	*	0	0	0
AT5G04040	AT5G04040_at	SDP1	chr5:1089342-1093179 FORWARD LENGTH=3275	Patatin-like phospholipase family protein	30.78	28.99	36.22	31.94	3.28	123.6	131.76	102.23	119.22	9.55	3.73	3.02	4.66	*	36.84	54.26	53.98	48.15	6.31	112.97	127.21	109.88	116.89	6.7	2.43	1.95	3.14	*	35.4305	1.13	0	0	0	0
AT3G51840	AT3G51840_at	ACX4, ATSCX, ATG6	chr3:19225360-19229163 REVERSE LENGTH=1759	acyl-CoA oxidase 4	58.22	81.35	63.24	67.6	8.21	384.97	426.8	411.15	407.59	15.9	6.03	4.96	7.6	*	55.25	100.08	107.74	87.76	17.36	339.55	377.77	448.75	388.39	33.23	4.43	3.21	6.69	*	35.2823	0.84	0	0	0	0
AT4G08920	AT4G08920_at	CRY1, BLU1, HY4, OOP2, ATCRY1	chr4:5724103-5727253 FORWARD LENGTH=2551	cryptochrome 1	126.48	103.01	149.87	126.52	13.67	420.48	359	319.86	365.02	30.16	2.89	2.32	3.64	*	83.12	167.71	213.38	154.53	38.58	372.68	317.29	316.34	334.93	19.46	2.17	1.51	3.7	*	34.9138	0.7	0	0.528	0	0
AT5G39580	AT5G39580_at		chr5:15847078-15849108 REVERSE LENGTH=1245	Peroxidase superfamily protein	37.14	44.75	52.92	45.29	6.16	125.2	143.49	281.59	183.36	49.71	4.05	2.18	6.35	*	77.92	74.43	128.82	93.6	17.83	180.18	167.89	178.41	175.24	5.41	1.87	1.42	2.73	*	34.8624	1.35	*	0	0	0
AT3G13062	AT3G13062_at		chr3:4184569-4187084 FORWARD LENGTH=1709	Polyketide cyclase/dehydrase and lipid transport superfamily protein	91.39	103.86	125.8	106.86	11.2	313.07	390.42	354.02	352.6	25.71	3.3	2.69	4.11	*	63.61	103.47	123.1	96.47	18.13	190.15	258.64	259.44	235.93	24.81	2.45	1.76	3.65	*	34.5725	-0.8	0	0	0	0
AT1G79380	AT1G79380_at		chr1:29860491-29863316 FORWARD LENGTH=1820	Ca(2)-dependent phospholipid-binding protein (Copine) family	239.58	227.83	168.15	211.71	23.16	446.41	444.25	373.09	420.97	25.77	1.99	1.63	2.48	*	265.81	394.05	357.53	338.91	39.35	445.03	420.74	429.43	432.6	9.91	1.28	1.07	1.58	0	34.3558	1.22	*	0	0	0
AT2G02180	AT2G02180_at	TOM3	chr2:560864-563233 FORWARD LENGTH=1296	tobamovirus multiplication protein 3	397.79	428.09	478.56	434.78	26.46	988.36	1031.21	1190.63	1069.03	67.68	2.46	2.13	2.84	*	307.52	478.19	415.43	399.69	52.72	679.09	685.07	691.58	685.7	16.08	1.72	1.4	2.2	*	34.2723	-0.87	0	0	0	0
AT3G52800	AT3G52800_at		chr3:19569311-19570682 FORWARD LENGTH=1129	A20/AN1-like zinc finger family protein	327.25	322.15	255	301.41	24.71	455.63	457.33	517	474.78	23.53	1.58	1.35	1.86	*	419.94	382.08	304.97	368.47	34.71	365.37	380.58	417.29	387.28	17.65	1.05	0.89	1.26	0	34.0741	0.99	0	0	0	0
AT1G48840	AT1G48840_at		chr1:18061521-18065031 FORWARD LENGTH=2473	Plant protein of unknown function (DUF639)	17.03	14.59	14.58	15.36	1.99	58.63	57.87	48.75	55.39	4.09	3.61	2.86	4.7	*	20.81	29.86	37.44	29.33	5.09	72.19	76.15	69.08	72.37	3.53	2.47	1.89	3.48	*	33.9161	1.3	*	0	0	0
AT2G31800	AT2G31800_at		chr2:13520325-13523708 REVERSE LENGTH=1773	Integrin-linked protein kinase family	151.56	166.24	138.62	152.17	9.89	444.38	379.93	292.53	372.59	44.56	2.45	1.92	3.03	*	191.45	278.76	219.69	229.71	27	427.64	431.09	298.51	385.4	44.71	1.68	1.27	2.21	*	33.8542	1.19	0	0	0	0
AT5G18670	AT5G18670_at	BMY3, BAM9	chr5:6225956-6228132 FORWARD LENGTH=1926	beta-amylase 3	32.06	27.04	50.18	36.17	7.44	159.17	266.28	247.32	224.07	33.84	6.19	4.12	9.87	*	18.3	45.05	84.44	49.25	19.33	218.86	205.79	247.68	224.16	13.01	4.55	2.73	12.87	*	33.7379	0.47	0	0	0	0
AT2G01450	AT2G01450_at	ATMPK17, MPK17	chr2:199511-202198 REVERSE LENGTH=1756	MAP kinase 17	137.85	142.58	142.58	141.08	4.75	489.52	370.74	478	446.39	37.71	3.16	2.7	3.65	*	182.9	198.19	208.74	196.5	9.6	401.4	360.37	414.25	392.48	18.25	2	1.79	2.23	*	33.7037	1.26	*	0	0	0
AT1G55810	AT1G55810_at	UKL3	chr1:20860609-20864266 FORWARD LENGTH=1768	uridine kinase-like 3	221.25	123.24	177.08	173.87	28.2	663.57	584.04	631.81	626.84	23.39	3.61	2.82	4.94	*	196.7	214.26	221.83	210.33	9.06	561.18	415.46	442.26	472.83	44.6	2.25	1.87	2.64	*	33.6879	0.94	0	0	0	0
AT1G68160	AT1G68160_at		chr1:25545808-25548894 REVERSE LENGTH=1451	Protein of unknown function (DUF3755)	106.21	110.63	100.71	105.81	3.94	146.62	139.8	139.6	141.89	3.67	1.34	1.25	1.45	*	86.25	135.88	125.37	115.73	15.62	107.69	146.13	122.49	125.15	12.1	1.08	0.83	1.45	0	33.6	0.85	0	0	0	0
AT1G12790	AT1G12790_at		chr1:4359151-4361272 REVERSE LENGTH=1172	CONTAINS InterPro DOMAIN/s: RuvA domain 2-like (InterPro:IPR010994); Has 29 Blast hits to 29 proteins in 9 species: Archae - 0; Bacteria - 2; Metazoa - 0; Fungi - 0; Plants - 27; Viruses - 0; Other Eukaryotes - 0 (source: NCBI BLink).	35.7	37.8	35.77	36.33	1.81	164.14	170.18	181.14	171.46	6.78	4.72	4.26	5.25	*	41.2	60.56	52.31	51.54	6.31	175.15	177.78	177.11	176.79	5.49	3.43	2.83	4.32	*	33.5681	1.12	0	0	0	0
AT5G47040	AT5G47040_at	LON2	chr5:19093152-19098715 REVERSE LENGTH=2908	lon protease 2	97	94.59	113.48	101.72	6.47	190.51	217.7	186.96	198.35	11.02	1.95	1.7	2.24	*	82.98	192.54	168.85	148.09	33.62	231.3	252	216.14	233.01	11.29	1.57	1.13	2.52	0	33.5294	0.9	0	0	0	0
AT5G03470	AT5G03470_at	ATB' ALPHA	chr5:866449-869024 FORWARD LENGTH=1986	Protein phosphatase 2A regulatory B subunit family protein	77.46	79.11	82.55	79.35	3.87	240.81	254.33	224.42	240.19	10.44	3.03	2.72	3.37	*	62.87	63.46	71.14	66.33	3.75	127.04	135.28	160.59	141.21	10.96	2.13	1.81	2.49	*	33.4559	-1.06	0	0	0	0
AT5G56750	AT5G56750_at	NDL1	chr5:22957877-22960916 FORWARD LENGTH=1460	N-MYC downregulated-like 1	80.77	81.1	89.26	83.84	4.14	523.88	445.6	462.8	476.85	24.55	5.69	5.05	6.4	*	89.42	80.38	77.56	82.7	4.67	328.08	295.09	310.8	311.13	11.49	3.76	3.37	4.22	*	33.2673	-0.9	0	0	0	0
AT2G20740	AT2G20740_at		chr2:8935607-8937512 FORWARD LENGTH=1067	Tetraspanin family protein	68.62	72.06	91.42	77.5	7.54	210.99	196.85	252.07	219.97	16.93	2.84	2.32	3.5	*	44.1	64.2	63.36	57	7.16	99.2	111.49	151.28	120.49	16.13	2.11	1.55	2.87	*	33.1897	-1.05	0	0	0	0
AT2G30620	AT2G30620_at		chr2:13044931-13046511 FORWARD LENGTH=1495	winged-helix DNA-binding transcription factor family protein	70.31	72.4	72.82	72.14	3.66	188.04	164.89	174.24	175.38	8.03	2.43	2.17	2.72	*	45.24	68.16	69.74	61.05	8.31	92.95	129.31	167.7	129.96	21.96	2.13	1.45	3.03	*	33.1797	-0.95	0	0	0	0
AT1G19660	AT1G19660_at		chr1:6799981-6802652 REVERSE LENGTH=1457	Wound-responsive family protein	57.54	37.53	59.35	50.98	7.82	142.16	140.89	130.78	138.62	6.41	2.72	2.14	3.67	*	42.88	98.57	108.49	83.2	20.88	147.69	181.81	194.23	174.16	15.16	2.09	1.43	3.62	*	33.1776	0.92	0	0	0	0
AT4G11330	AT4G11330_at	ATMPK5, MPK5	chr4:6892055-6894149 FORWARD LENGTH=1523	MAP kinase 5	51.5	63.28	55.21	56.75	4.48	120.91	119.41	167.01	135.86	16.02	2.39	1.87	3	*	36.02	44.79	43.33	41.61	3.37	55.63	73.56	64.2	64.44	5.86	1.55	1.26	1.89	*	32.6203	-1.13	0	0	0	0
AT1G01360	AT1G01360_at	RCAR1, PYL9	chr1:141971-143183 FORWARD LENGTH=1000	regulatory component of ABA receptor 1	30.98	20.35	29.06	26.91	3.59	53.39	54.98	49.28	52.58	2.69	1.95	1.57	2.53	*	23.31	28.97	49.47	33.77	8.16	48.49	45.9	64.48	52.97	6.03	1.57	1.06	2.67	0	32.4841	0.73	0	0	0	0
AT5G64240	AT5G64240_at	AtMC3, MC3	chr5:25695620-25697416 FORWARD LENGTH=1472	metacaspase 3	21.18	15.12	13.67	16.71	2.65	60.08	56.59	49.49	55.39	3.61	3.32	2.56	4.55	*	18.44	19.91	24.19	20.84	2	47.31	38.01	47.31	44.02	3.43	2.11	1.73	2.6	*	32.4219	0.93	0	0	0	0
AT2G25070	AT2G25070_at		chr2:10663240-10665964 REVERSE LENGTH=1517	Protein phosphatase 2C family protein	92.25	112.55	107.73	103.97	7.55	348.57	310.1	269.44	309.47	23.83	2.98	2.5	3.54	*	66.58	113.92	102.94	94.26	15.11	202.16	223.47	189.08	205.3	12.13	2.18	1.69	3	*	32.4	-0.84	0	0	0	0
AT2G14170	AT2G14170_at	ALDH6B2	chr2:5977356-5981899 REVERSE LENGTH=2195	aldehyde dehydrogenase 6B2	132.9	116.59	144.33	131.42	8.54	404.15	385.95	589.68	459.82	65.33	3.5	2.63	4.44	*	121.88	128.43	122.32	124.43	4.23	235.7	234.43	282.29	250.56	16.28	2.01	1.78	2.26	*	32.3194	-0.93	0	0	0	0
AT5G43060	AT5G43060_at		chr5:17269507-17272164 REVERSE LENGTH=1716	Granulin repeat cysteine protease family protein	73.8	75.18	43.71	64.38	10.9	107.17	103.57	118.81	109.87	6.85	1.71	1.3	2.4	*	100.98	81.28	67.61	83.7	10.36	97.64	88.9	87.81	91.25	5.06	1.09	0.88	1.39	0	32.3077	0.93	0	0	0	0
AT5G60860	AT5G60860_at	AtRABA1f, RABA1f	chr5:24484622-24485705 FORWARD LENGTH=922	RAB GTPase homolog A1F	210.02	235.63	255.92	233.29	14.71	1230.44	1108.51	1089.21	1141.72	45.67	4.89	4.34	5.55	*	363.55	235.85	268.92	289.06	38.48	1027.3	984.58	1161.25	1057.52	56.02	3.66	2.94	4.75	*	32.2581	0.95	0	0	0	0
AT3G15620	AT3G15620_at	UVR3	chr3:5293306-5296592 REVERSE LENGTH=1884	DNA photolyase family protein	9.53	10.63	10.93	10.32	1.85	120.56	123	135.51	126.4	5.68	12.25	9.35	17.48	*	10.9	14.76	13.26	12.74	1.84	127.58	82.37	125.93	111.87	14.82	8.78	6.34	12.28	*	32.1925	0.85	0	0	0	0
AT2G40110	AT2G40110_at		chr2:16747940-16749512 FORWARD LENGTH=838	Yippee family putative zinc-binding protein	15.15	23.91	28.25	22.3	4.55	53.41	65.26	58.45	59.29	4.38	2.66	1.93	4.06	*	16.83	23.62	31.73	23.92	4.67	37.65	53.23	43.07	44.55	5.29	1.86	1.31	2.85	*	32.1244	0.66	0	0	0	0
AT3G01430	AT3G01430_at		chr3:165408-166247 REVERSE LENGTH=840	BEST Arabidopsis thaliana protein match is: NHL domain-containing protein (TAIR:AT5G14890.1); Has 98 Blast hits to 98 proteins in 12 species: Archae - 0; Bacteria - 0; Metazoa - 0; Fungi - 0; Plants - 98; Viruses - 0; Other Eukaryotes - 0 (source: NCBI BLink).	77.55	83.5	64.94	75.33	6.62	164.06	145.44	187.68	165.64	12.92	2.2	1.81	2.68	*	89.23	75.13	86.53	83.56	4.84	140.84	105.31	122.38	122.73	10.54	1.47	1.23	1.73	*	32.0442	0.94	0	0	0	0
AT1G22190	AT1G22190_at		chr1:7835782-7837288 FORWARD LENGTH=1507	Integrase-type DNA-binding superfamily protein	64.52	70.23	76.54	70.22	4.6	255.44	197.22	290.7	247.37	27.66	3.52	2.81	4.32	*	58.12	75.85	65.28	66.28	5.91	134.59	163.05	219.82	172.45	25.63	2.6	1.91	3.41	*	32.0285	-0.89	0	0	0	0
AT2G22990	AT2G22990_at		chr2:9786441-9790179 FORWARD LENGTH=1579	sinapoylglucose 1	278.82	201.41	471.17	317.1	80.28	752.15	692.64	645.36	696.84	33.76	2.2	1.53	3.78	*	117.23	331.09	446.48	298.12	97.12	453.99	462.85	539.1	484.37	28.62	1.62	1.04	3.51	0	32.0261	-0.54	0	0.645	0	0
AT2G39400	AT2G39400_at		chr2:16452612-16454801 FORWARD LENGTH=1194	alpha/beta-Hydrolases superfamily protein	42.27	44.02	47.99	44.63	2.95	396.11	539.41	498.64	477.96	44.07	10.71	8.82	12.85	*	20.31	48.31	50.05	39.49	10.05	267.94	398.55	457.37	374.61	57.32	9.49	6.02	16.99	*	31.746	-0.78	0	0	0	0
AT3G60130	AT3G60130_at	BGLU16	chr3:22210246-22213840 FORWARD LENGTH=1740	beta glucosidase 16	67.29	92.42	91.91	84.19	9.73	325.32	328	251.41	299.52	28.95	3.56	2.78	4.6	*	44.67	101.86	104.64	83.49	20.25	236.98	204.46	235.18	225.63	12.89	2.7	1.9	4.52	*	31.6547	-0.68	0	0	0	0
AT1G07000	AT1G07000_at	ATEXO70B2, EXO70B2	chr1:2150194-2152325 REVERSE LENGTH=2024	exocyst subunit exo70 family protein B2	49.59	86.86	46.96	61.16	13.49	130.83	134.24	178.76	148.03	15.79	2.42	1.68	3.9	*	50.17	90.97	75.15	71.99	12.34	89.5	133.73	124.41	115.8	13.89	1.61	1.15	2.34	0	31.5476	0.75	0	0	0	0
AT5G10450	AT5G10450_at	GRF6, AFT1, 14-3-3lambda	chr5:3283853-3286347 REVERSE LENGTH=1426	G-box regulating factor 6	32.26	26.81	38.02	32.15	3.99	105.7	91.29	142.82	113.5	15.71	3.53	2.57	4.8	*	25.87	26.87	34.03	29.03	4.12	61.94	64.8	68.22	64.55	3.7	2.22	1.76	2.94	*	31.5175	-0.81	0	0	0	0
AT3G03870	AT3G03870_at		chr3:995217-996305 FORWARD LENGTH=1089	unknown protein; BEST Arabidopsis thaliana protein match is: unknown protein (TAIR:AT5G18130.1); Has 41 Blast hits to 41 proteins in 11 species: Archae - 0; Bacteria - 0; Metazoa - 2; Fungi - 0; Plants - 39; Viruses - 0; Other Eukaryotes - 0 (source: NCBI BLink).	16.44	22.12	21.07	20.03	2.74	155.53	112.66	163.26	144.24	15.64	7.2	5.43	9.74	*	10.51	11.91	18.5	13.79	2.74	64.17	69.51	100.65	77.33	12.17	5.61	3.72	8.85	*	31.4917	-0.99	0	0	0	0
AT4G17080	AT4G17080_at		chr4:9601451-9604207 FORWARD LENGTH=2053	Histone H3 K4-specific methyltransferase SET7/9 family protein	86.32	94.06	65.22	82.03	9.73	227.27	249.1	222.54	233.25	9.83	2.84	2.35	3.57	*	90.02	109.35	98.19	98.95	6.4	174.47	183.5	175.14	177.84	4.85	1.8	1.61	2.03	*	31.4894	0.98	0	0	0	0
AT3G51000	AT3G51000_at		chr3:18945025-18946621 REVERSE LENGTH=1327	alpha/beta-Hydrolases superfamily protein	136.79	157.1	131.78	141.6	8.89	335.74	270.88	282.02	295.7	20.55	2.09	1.79	2.43	*	131.02	187.39	171.7	163.27	17.53	216.73	252.56	318.27	262.22	30.46	1.61	1.23	2.09	*	31.2849	0.93	0	0	0	0
AT1G12780	AT1G12780_at	UGE1, ATUGE1	chr1:4355926-4358328 REVERSE LENGTH=1462	UDP-D-glucose/UDP-D-galactose 4-epimerase 1	79.04	93.18	63.92	78.97	10.14	486.64	358.36	428.34	424.33	37.31	5.37	4.19	7.05	*	74.3	108.73	90.51	90.63	11.37	290.13	331.46	427.6	348.73	42.01	3.85	2.88	5.16	*	31.2649	0.85	0	0	0	0
AT1G02816	AT1G02816_at		chr1:621461-622469 FORWARD LENGTH=1009	Protein of unknown function, DUF538	25.29	38.47	48.74	37.4	7.14	108.87	94.13	128.42	110.15	10.43	2.95	2.13	4.4	*	25.84	39.6	37.45	34.25	4.68	53.32	71.45	76.47	67.04	7.39	1.96	1.47	2.65	*	30.9859	-0.71	0	0	0	0
AT5G40450	AT5G40450_at		chr5:16184650-16195651 REVERSE LENGTH=8957	unknown protein; FUNCTIONS IN: molecular_function unknown; INVOLVED IN: biological_process unknown; LOCATED IN: chloroplast, plasma membrane; EXPRESSED IN: 24 plant structures; EXPRESSED DURING: 13 growth stages; Has 30201 Blast hits to 17322 proteins in 780 species: Archae - 12; Bacteria - 1396; Metazoa - 17338; Fungi - 3422; Plants - 5037; Viruses - 0; Other Eukaryotes - 2996 (source: NCBI BLin…	103.21	98.12	98.48	100.52	5.74	529.02	382.44	303.73	405.38	66.22	4.03	2.92	5.22	*	183.23	197.81	122.95	167.6	23.99	950.35	702.98	311.19	654.62	185.97	3.91	2.02	6.25	*	30.8219	1.26	*	0	0	0
AT4G28260	AT4G28260_at		chr4:14004485-14006970 FORWARD LENGTH=2233	unknown protein; FUNCTIONS IN: molecular_function unknown; INVOLVED IN: biological_process unknown; LOCATED IN: cellular_component unknown; EXPRESSED IN: 24 plant structures; EXPRESSED DURING: 15 growth stages; Has 50 Blast hits to 42 proteins in 12 species: Archae - 0; Bacteria - 0; Metazoa - 1; Fungi - 0; Plants - 49; Viruses - 0; Other Eukaryotes - 0 (source: NCBI BLink).	26.91	28.35	24.27	26.68	2.93	100.15	96.94	99.32	98.78	2.97	3.7	3.11	4.54	*	25.8	36.65	44.85	35.61	6	91.68	107.09	102.76	100.2	5.57	2.81	2.16	3.93	*	30.5466	0.93	0	0	0	0
AT5G05930	AT5G05930_at	ATGC1, GC1	chr5:1779974-1783412 REVERSE LENGTH=1478	guanylyl cyclase 1	52.34	54.39	56.29	54.39	3.68	189.03	188.5	198.66	192.02	5.31	3.53	3.15	4	*	51.6	66.34	70	62.55	6.17	159.49	172.9	155	162.25	7.12	2.59	2.19	3.14	*	30.4762	0.94	0	0	0	0
AT4G05330	AT4G05330_at	AGD13	chr4:2720561-2723125 REVERSE LENGTH=1322	ARF-GAP domain 13	31.28	38.55	25.62	31.37	4.74	90.73	78.13	69.57	79.71	6.88	2.54	1.94	3.48	*	26.36	30.65	38.4	31.74	3.82	58.96	49.63	50.89	53.26	3.62	1.68	1.35	2.14	*	30.4124	0.74	0	0	0	0
AT1G56280	AT1G56280_at	ATDI19, DI19	chr1:21072855-21074877 REVERSE LENGTH=1185	drought-induced 19	362.93	261.99	396.55	340.49	40.94	1375.88	1128.23	1189.54	1230.97	75.44	3.62	2.93	4.59	*	258.77	562.61	500.3	439.99	95.28	1211.9	1190.89	1255.06	1218.21	30.25	2.77	2.04	4.31	*	30.3754	0.81	0	0	0	0
AT5G58720	AT5G58720_at		chr5:23719702-23723137 REVERSE LENGTH=1997	smr (Small MutS Related) domain-containing protein	32.36	37.64	39.59	36.56	3.07	72.83	68.4	73.38	71.22	2.95	1.95	1.68	2.29	*	44.67	50.97	39.42	45.07	3.75	61.99	76.51	57.78	65.52	6.36	1.45	1.17	1.79	0	30.3571	1.01	0	0	0	0
AT1G33055	AT1G33055_at		chr1:11971308-11972578 REVERSE LENGTH=1271	unknown protein; FUNCTIONS IN: molecular_function unknown; INVOLVED IN: anaerobic respiration; LOCATED IN: endomembrane system; EXPRESSED IN: 13 plant structures; EXPRESSED DURING: 6 growth stages; Has 20 Blast hits to 20 proteins in 8 species: Archae - 0; Bacteria - 0; Metazoa - 0; Fungi - 0; Plants - 20; Viruses - 0; Other Eukaryotes - 0 (source: NCBI BLink).	4.72	6.72	6.15	5.8	3.9	305.4	306.81	365.75	326.83	22.12	56.32	26.44	100000000	*	3.92	7.86	10.05	6.77	4.95	332.91	219.56	302.13	285.14	34.27	42.13	18.43	100000000	*	30.295	0	0	0	0	0
AT1G80920	AT1G80920_at	J8	chr1:30403644-30404690 REVERSE LENGTH=852	Chaperone DnaJ-domain superfamily protein	68.1	64.85	81.81	71.6	5.78	1396.25	1241.65	1559.28	1399.94	92.03	19.55	16.51	23.3	*	18.71	51.56	88.62	52.82	20.48	947.11	918.01	1217.23	1027.41	96.95	19.45	11.51	54.07	*	30.2847	-0.81	0	0	0	0
AT5G57560	AT5G57560_at	TCH4, XTH22	chr5:23307130-23308282 REVERSE LENGTH=1068	Xyloglucan endotransglucosylase/hydrolase family protein	122.78	86.53	68.24	92.48	16.07	379.54	336.21	559.69	418.29	74.37	4.52	2.95	6.9	*	83	120.71	93.1	98.79	11.71	263.51	234.33	419.03	305.61	57.33	3.09	2.06	4.37	*	30.1695	0.77	0	0	0	0
AT3G49790	AT3G49790_at		chr3:18468051-18469763 REVERSE LENGTH=1713	Carbohydrate-binding protein	13.58	10.07	9.93	11.26	2.07	125.41	110.48	150.14	128.82	11.67	11.45	8.39	16.79	*	8.43	7.59	7.98	8.08	1.43	61.36	56.39	74.08	63.83	5.52	7.9	5.86	11.39	*	30.1549	-0.9	0	0	0	0
AT4G37870	AT4G37870_at	PCK1, PEPCK	chr4:17802694-17806539 REVERSE LENGTH=2413	phosphoenolpyruvate carboxykinase 1	169.33	154.48	149.65	157.96	7.04	588.07	524.48	617.13	576.81	30.75	3.65	3.25	4.09	*	143.43	164.1	163.4	156.58	8.28	453.33	351.36	506.27	436.77	46.04	2.79	2.27	3.35	*	30.1538	-0.9	0	2.521	5.054	1.75
AT3G48360	AT3G48360_at	BT2, ATBT2	chr3:17908192-17910525 REVERSE LENGTH=1439	BTB and TAZ domain protein 2	32.69	21.28	31.66	28.33	4.22	411.65	436.49	705.56	517.74	95.18	18.28	12.01	26.87	*	18.2	34.55	54.84	35.84	10.87	375.59	511.83	532.58	472.7	51.26	13.19	8.39	26.73	*	30.1415	0.62	0	0	0.285	0
AT1G19770	AT1G19770_at	ATPUP14, PUP14	chr1:6832347-6833837 FORWARD LENGTH=1396	purine permease 14	631.98	594.05	504.6	576.83	39.55	1245.24	1361.55	1097.1	1234.78	78.88	2.14	1.83	2.5	*	457.07	962.18	639.19	685.87	149.69	1332.08	1343.3	1029.18	1234.8	104.46	1.8	1.28	2.86	*	30.0546	0.75	0	0	0	0
AT3G02340	AT3G02340_at		chr3:477003-478442 FORWARD LENGTH=1440	RING/U-box superfamily protein	26.62	22.59	24.14	24.38	2.27	51.13	60.68	59.95	57.36	4.39	2.35	1.93	2.88	*	15.59	26.89	26.16	22.76	4.28	37.82	42.92	42.93	41.23	2.52	1.81	1.35	2.65	*	30.0518	-0.78	0	0	0	0
AT4G32030	AT4G32030_at		chr4:15490740-15493336 FORWARD LENGTH=1436	unknown protein; BEST Arabidopsis thaliana protein match is: unknown protein (TAIR:AT1G15800.1); Has 35333 Blast hits to 34131 proteins in 2444 species: Archae - 798; Bacteria - 22429; Metazoa - 974; Fungi - 991; Plants - 531; Viruses - 0; Other Eukaryotes - 9610 (source: NCBI BLink).	95.06	97.97	110.7	101.19	5.71	270.06	220.97	218.24	236.56	17.1	2.34	2	2.71	*	71.82	100.5	105.06	92.36	10.86	159.64	161.09	148.22	156.67	5.95	1.7	1.4	2.12	*	30	-0.89	0	0	0	0
AT1G02860	AT1G02860_at	NLA, BAH1	chr1:635144-637262 FORWARD LENGTH=1517	SPX (SYG1/Pho81/XPR1) domain-containing protein	35.04	32.09	24.08	30.43	3.83	116.55	102.77	95.15	104.98	6.63	3.45	2.77	4.43	*	23.13	21.58	28.91	24.35	2.78	56.81	53.21	61.58	57.51	3.04	2.36	1.94	2.95	*	29.9639	-0.94	0	0	0	0
AT4G10170	AT4G10170_at		chr4:6344331-6345537 FORWARD LENGTH=1207	SNARE-like superfamily protein	41.18	32.09	37.47	36.89	2.93	65.78	69.77	83.07	73.08	5.85	1.98	1.64	2.39	*	30.31	30.8	39.62	33.55	3.28	43.8	45.03	51.67	46.61	3.02	1.39	1.15	1.7	0	29.878	-0.9	0	0	0	0
AT1G27290	AT1G27290_at		chr1:9481532-9482912 FORWARD LENGTH=1005	unknown protein; FUNCTIONS IN: molecular_function unknown; INVOLVED IN: biological_process unknown; EXPRESSED IN: 25 plant structures; EXPRESSED DURING: 15 growth stages; Has 44 Blast hits to 44 proteins in 12 species: Archae - 0; Bacteria - 0; Metazoa - 0; Fungi - 0; Plants - 44; Viruses - 0; Other Eukaryotes - 0 (source: NCBI BLink).	42.31	42.59	59.41	48.07	5.94	351.4	469.71	636.24	485.95	83.36	10.11	6.93	14.16	*	23.79	39.31	63.52	41.94	11.94	279.31	284.48	379.68	314.11	33.69	7.49	4.86	14.33	*	29.8701	-0.73	0	0	0	0
AT5G34850	AT5G34850_at	ATPAP26, PAP26	chr5:13108154-13111631 REVERSE LENGTH=2030	purple acid phosphatase 26	248.64	229.44	252.71	243.7	8.45	372.18	348.32	301	340.98	21.75	1.4	1.24	1.57	*	201.37	342.5	370.39	304.49	53.11	308.41	382.66	364.96	351.8	24.2	1.16	0.87	1.65	0	29.8387	0.89	0	0	0	0
AT2G35680	AT2G35680_at		chr2:14996713-14999085 REVERSE LENGTH=1800	Phosphotyrosine protein phosphatases superfamily protein	80.84	94.07	85.87	86.73	5.44	297.32	237.42	202.84	245.31	27.95	2.83	2.25	3.47	*	89.41	143.48	128.4	120.3	17.06	247.06	259.64	214.67	240.54	14.26	2	1.58	2.65	*	29.7778	1.05	0	0	0	0
AT5G18170	AT5G18170_at	GDH1	chr5:6006039-6008472 FORWARD LENGTH=1593	glutamate dehydrogenase 1	22.7	22.43	21.25	22.19	3.19	83.76	115.56	104.26	101.24	10.05	4.56	3.46	6.21	*	21.61	41.53	28.13	30.16	6.78	91.6	131.07	101.44	107.83	12.85	3.58	2.43	5.85	*	29.7688	0.82	0	0	0	0
AT1G62310	AT1G62310_at		chr1:23036039-23039609 REVERSE LENGTH=2687	transcription factor jumonji (jmjC) domain-containing protein	45.74	34.08	31.35	37.03	5.11	87.94	59.14	52.09	65.99	11.39	1.78	1.21	2.55	*	90	105.53	55.54	84.08	15.31	146.4	132.95	69.29	116.08	23.98	1.38	0.85	2.19	0	29.7521	1.51	*	0	0	0
AT1G60940	AT1G60940_at	SNRK2-10, SNRK2.10, SRK2B	chr1:22439123-22442190 REVERSE LENGTH=1655	SNF1-related protein kinase 2.10	220.94	275.4	154.45	216.99	35.58	495.92	423.18	341.23	419.97	44.86	1.94	1.42	2.75	*	185.99	329.72	235.84	250.45	43.16	348.56	408.39	277.92	345.67	38.8	1.38	1	2	0	29.5775	0.77	0	0	0	0
AT1G70160	AT1G70160_at		chr1:26419949-26422529 FORWARD LENGTH=1966	unknown protein; FUNCTIONS IN: molecular_function unknown; INVOLVED IN: biological_process unknown; LOCATED IN: endomembrane system; EXPRESSED IN: 24 plant structures; EXPRESSED DURING: 15 growth stages; BEST Arabidopsis thaliana protein match is: unknown protein (TAIR:AT4G27020.1); Has 108 Blast hits to 108 proteins in 20 species: Archae - 0; Bacteria - 0; Metazoa - 0; Fungi - 0; Plants - 89; Vi…	184.07	220.75	179.43	194.52	14.62	264.17	378.92	326.51	323.4	34.9	1.66	1.32	2.05	*	202.09	373.78	319.5	298.3	51.77	347.45	430.34	339.71	372.39	30.43	1.25	0.93	1.78	0	29.5455	1.08	0	0	0	0
AT5G06370	AT5G06370_at		chr5:1947139-1948612 REVERSE LENGTH=1120	NC domain-containing protein-related	194.19	210.66	232.54	212.68	12.54	526.64	555.03	634.31	572.14	33.71	2.69	2.34	3.09	*	168.44	260.76	271.41	233.19	33.54	415.75	526.48	605.25	515.26	56.59	2.21	1.65	3.03	*	29.4872	0.82	0	0	0	0
AT4G19370	AT4G19370_at		chr4:10566150-10567838 REVERSE LENGTH=1070	Protein of unknown function (DUF1218)	24.17	21.65	14.3	19.99	3.26	33.36	30.6	34.32	32.82	2.19	1.64	1.26	2.28	*	13.38	17.8	15.3	15.23	1.76	14.74	19.36	20.08	18.05	2.2	1.19	0.89	1.57	0	29.3651	-0.92	0	0	0	0
AT2G33830	AT2G33830_at		chr2:14309484-14310339 REVERSE LENGTH=658	Dormancy/auxin associated family protein	67.52	73.55	102.39	80.45	11.98	1298.76	1235.59	1478.79	1333.65	78.7	16.58	13.01	22.26	*	36.95	112.26	97.42	81.92	23.89	1012.28	1124.72	1267.6	1137.47	80.44	13.89	9.19	26.87	*	29.362	0.51	0	0.384	0	0
AT2G15695	AT2G15695_at		chr2:6833880-6836434 REVERSE LENGTH=1675	Protein of unknown function DUF829, transmembrane 53	216.48	157.4	218.7	197.34	20.27	383.31	309.38	344.24	344.76	21.99	1.75	1.44	2.15	*	154.3	278.27	216.63	215.99	37.01	270.89	291.01	290.71	284.36	9.22	1.32	1.02	1.84	0	29.1667	0.76	0	0	0	0
AT4G37790	AT4G37790_at	HAT22	chr4:17768042-17769606 FORWARD LENGTH=1370	Homeobox-leucine zipper protein family	105.96	151.24	144.21	133.65	14.64	295.69	263.99	334.29	298.37	20.35	2.23	1.82	2.79	*	107.68	119.98	74.6	101.24	13.89	220.97	200.36	131.32	184.34	27.24	1.82	1.29	2.55	*	29.1209	-0.99	0	0	0	0
AT1G22930	AT1G22930_at		chr1:8117339-8122127 FORWARD LENGTH=3851	T-complex protein 11	29.06	37.29	25.06	30.35	4.35	68.26	93.26	64.99	75.58	10.22	2.49	1.79	3.48	*	64.02	100.34	75.35	79.84	11.23	139.25	151.61	109.4	133.29	13.06	1.67	1.27	2.26	*	29.0503	1.88	*	0	0	0
AT5G66050	AT5G66050_at		chr5:26412088-26414536 REVERSE LENGTH=1376	Wound-responsive family protein	69.85	70.03	56.43	65.47	5.25	135.88	128.4	173.83	145.97	14.6	2.23	1.79	2.74	*	54.2	69.38	62.87	62.08	5.13	88.79	90.55	103.45	93.49	5.88	1.51	1.27	1.8	*	29.0503	-0.87	0	0	0	0
AT1G67920	AT1G67920_at		chr1:25473544-25474140 FORWARD LENGTH=597	unknown protein; BEST Arabidopsis thaliana protein match is: unknown protein (TAIR:AT1G24600.1); Has 22 Blast hits to 22 proteins in 5 species: Archae - 0; Bacteria - 0; Metazoa - 0; Fungi - 0; Plants - 22; Viruses - 0; Other Eukaryotes - 0 (source: NCBI BLink).	12.04	17.32	13.3	14.18	2.01	21.6	22.94	22.49	22.43	1.84	1.58	1.22	2.12	*	18.34	16.31	19.79	18.11	1.42	17.71	24.4	19.59	20.41	2.5	1.13	0.87	1.42	0	28.6885	0.99	0	0	0	0
AT1G05805	AT1G05805_at		chr1:1744773-1747693 FORWARD LENGTH=1425	basic helix-loop-helix (bHLH) DNA-binding superfamily protein	158.84	155.93	194.18	169.48	12.92	358.52	375.35	487.96	407.84	41.86	2.41	1.93	2.96	*	121.39	184.71	206.1	170.38	26.42	307.53	272.54	327.07	301.98	16.84	1.77	1.38	2.41	*	28.4974	0.73	0	0	0	0
AT5G02160	AT5G02160_at		chr5:426226-427297 FORWARD LENGTH=829	unknown protein; FUNCTIONS IN: molecular_function unknown; INVOLVED IN: biological_process unknown; LOCATED IN: chloroplast thylakoid membrane; EXPRESSED IN: 23 plant structures; EXPRESSED DURING: 13 growth stages; Has 121 Blast hits to 121 proteins in 17 species: Archae - 0; Bacteria - 0; Metazoa - 0; Fungi - 0; Plants - 121; Viruses - 0; Other Eukaryotes - 0 (source: NCBI BLink).	147.9	80.47	268.21	165.49	54.91	587.79	528.71	985.73	700.83	144.03	4.23	2.32	9.74	*	39.93	164.98	189.78	131.27	47.03	336.89	311.66	585.98	411.13	87.94	3.13	1.66	7.94	*	28.4483	-0.51	0	0	0	0
AT5G06690	AT5G06690_at	WCRKC1	chr5:2060501-2061956 REVERSE LENGTH=783	WCRKC thioredoxin 1	297.97	159.92	371.61	276.32	62.09	734.59	580.57	693.56	669.31	46.24	2.42	1.73	3.88	*	93.42	290.58	319.56	234.38	71.59	418.28	405.94	515.22	446.44	35.25	1.9	1.24	3.86	*	28.3237	-0.64	0	0	0	0
AT1G03380	AT1G03380_at	ATATG18G, ATG18G	chr1:835785-840940 FORWARD LENGTH=3732	homolog of yeast autophagy 18 (ATG18) G	71.8	82.48	46.94	66.93	11.14	225.71	213.35	151.42	196.76	23.38	2.94	2.12	4.23	*	128.22	194.09	171.59	164.41	20.18	347.01	342.07	264.28	317.94	27.11	1.93	1.52	2.51	*	28.3019	1.76	*	0	0	0
AT4G25170	AT4G25170_at		chr4:12909575-12911580 FORWARD LENGTH=1391	Uncharacterised conserved protein (UCP012943)	58.58	47.6	68.78	58.36	6.38	219.71	213.14	220.3	217.97	4.66	3.74	3.15	4.57	*	62.3	93.65	107.35	87.69	13.86	227.26	263.12	279.43	256.5	16.3	2.93	2.26	4.01	*	28.254	1.07	0	0	0	0
AT4G19830	AT4G19830_at		chr4:10772402-10774023 REVERSE LENGTH=957	FKBP-like peptidyl-prolyl cis-trans isomerase family protein	142.54	129.87	126.09	133	5.82	175.96	178.84	212.27	189.15	12.75	1.42	1.24	1.62	*	105.08	122.29	155.86	127.54	15.3	174.4	118.97	150.52	147.91	16.17	1.16	0.89	1.53	0	28.2258	-0.86	0	0	0	0
AT3G56930	AT3G56930_at		chr3:21073421-21076249 FORWARD LENGTH=1974	DHHC-type zinc finger family protein	45.09	44.62	44.44	44.72	2.51	97.78	83.51	102.32	93.9	6.56	2.1	1.81	2.43	*	32.8	57	48.79	46.05	7.58	79.56	80.8	71.54	77.13	3.77	1.67	1.3	2.32	*	28.1768	0.74	0	0	0	0
AT3G12630	AT3G12630_at		chr3:4012608-4013583 FORWARD LENGTH=976	A20/AN1-like zinc finger family protein	134.2	154.44	154.08	147.15	7.97	297.7	290.44	336.58	308.33	15.7	2.1	1.85	2.37	*	87.59	124.73	117.73	109.59	12.37	155.45	187.54	226.33	189.73	20.97	1.73	1.33	2.25	*	28.1081	-1.11	0	0	0	0
AT1G05385	AT1G05385_at	LPA19, Psb27-H1	chr1:1582671-1583718 REVERSE LENGTH=746	photosystem II 11 kDa protein-related	53.7	34.93	41.51	43.65	5.95	106.12	66.17	117.38	96.5	15.57	2.21	1.53	3.12	*	40.98	34.58	48.18	41.06	4.22	64.17	47.42	58.32	56.66	5.08	1.38	1.1	1.74	0	28.1046	-0.79	0	0	0	0
AT5G42940	AT5G42940_at		chr5:17216330-17220490 REVERSE LENGTH=2611	RING/U-box superfamily protein	45.56	50.11	49.05	48.26	2.93	110.62	97.96	95.44	100.86	5.94	2.09	1.82	2.4	*	50.89	48.58	71	56.66	7.41	88.51	89.97	95.5	91.51	3.44	1.61	1.31	2.07	*	28.022	0.91	0	0	0	0
AT4G36040	AT4G36040_at		chr4:17049171-17050274 REVERSE LENGTH=1104	Chaperone DnaJ-domain superfamily protein	105.74	159.72	149.61	137.79	18.14	895.45	1079.53	1131.11	1038.52	76.31	7.54	5.96	9.86	*	51.75	168.25	147.36	122.2	36.64	655.84	858.33	947.93	820.79	87.58	6.72	4.29	13.46	*	28.0201	-0.7	0	0.537	0	0
AT1G17970	AT1G17970_at		chr1:6184904-6187472 FORWARD LENGTH=1505	RING/U-box superfamily protein	60.72	59.23	60.18	59.97	2.26	89.73	101.64	106.79	99.17	7.02	1.65	1.44	1.88	*	30.57	45.85	43.26	39.7	5.23	50.19	48.01	62.39	53.24	4.88	1.34	1.04	1.78	0	27.7778	-1.23	*	0	0	0
AT5G19140	AT5G19140_at	ATAILP1, AILP1	chr5:6423153-6426166 FORWARD LENGTH=1295	Aluminium induced protein with YGL and LRDR motifs	552.28	696.57	712.75	652.65	54.4	1691.77	1726.59	1558.53	1659.31	56.56	2.54	2.21	2.97	*	371.72	610.6	647.67	542.31	90.23	1054.66	1087.71	1247.17	1127.93	63.92	2.08	1.6	2.9	*	27.6018	-0.91	0	0	0	0
AT3G24070	AT3G24070_at		chr3:8693085-8694709 FORWARD LENGTH=1625	Zinc knuckle (CCHC-type) family protein	22.63	17.8	24.31	21.61	2.17	40.44	41.76	40.51	40.94	1.69	1.89	1.6	2.29	*	16.03	21.21	27.69	21.54	3.59	31.91	32.56	32.42	32.26	1.45	1.5	1.16	2.08	0	27.5	-0.74	0	0	0	0
AT2G32800	AT2G32800_at	AP4.3A	chr2:13916452-13919179 FORWARD LENGTH=2728	protein kinase family protein	23.27	29.22	24.19	25.49	2.54	86.52	60.2	73.26	73.41	7.64	2.88	2.26	3.66	*	15.05	25.3	20.18	20.19	3.28	37.2	50.67	45.77	44.72	4.54	2.22	1.64	3.13	*	27.4336	-0.94	0	0	0	0
AT1G21400	AT1G21400_at		chr1:7493426-7496710 FORWARD LENGTH=1955	Thiamin diphosphate-binding fold (THDP-binding) superfamily protein	112.83	162.15	92.67	122.12	21.75	283.73	273.61	470.92	342.94	64.41	2.81	1.79	4.35	*	113.22	116.82	93.72	107.88	8.28	143.12	183.95	223.69	183.64	23.96	1.7	1.3	2.16	*	27.3743	-0.79	0	0	0	0
AT1G67980	AT1G67980_at	CCOAMT	chr1:25487714-25489158 FORWARD LENGTH=931	caffeoyl-CoA 3-O-methyltransferase	6.4	5.2	6.28	5.95	1	13.21	15.91	18.25	15.82	1.97	2.66	1.9	3.85	*	6.05	5.76	7.15	6.3	0.8	9.16	18.61	14.61	14.03	3.05	2.23	1.38	3.28	*	27.3684	0.75	0	0	0	0
AT5G18640	AT5G18640_at		chr5:6212802-6215782 FORWARD LENGTH=1724	alpha/beta-Hydrolases superfamily protein	64.7	64.03	71.68	66.46	5.1	178.88	186.26	172.08	179.72	8.75	2.7	2.34	3.16	*	51.95	72.8	105.39	76.71	16.04	165.41	191.9	179.59	178.67	10.11	2.33	1.7	3.58	*	27.3504	0.75	0	0	0	0
AT1G08570	AT1G08570_at	ACHT4	chr1:2712883-2714733 FORWARD LENGTH=1340	atypical CYS HIS rich thioredoxin 4	52.49	30.36	92.23	58.4	18.14	369.81	322.45	349.45	347.11	14.2	5.94	3.91	12.18	*	18.97	60.37	75.51	51.42	17.31	214.6	219.56	263.36	231.91	16.4	4.51	2.85	10.16	*	27.11	-0.49	0	0.617	0	0
AT5G63905	AT5G63905_at		chr5:25570858-25571586 REVERSE LENGTH=511	unknown protein; FUNCTIONS IN: molecular_function unknown; INVOLVED IN: N-terminal protein myristoylation; LOCATED IN: cellular_component unknown; EXPRESSED IN: 20 plant structures; EXPRESSED DURING: 12 growth stages; Has 30201 Blast hits to 17322 proteins in 780 species: Archae - 12; Bacteria - 1396; Metazoa - 17338; Fungi - 3422; Plants - 5037; Viruses - 0; Other Eukaryotes - 2996 (source: NCBI…	11.67	11.6	15.71	13.1	1.73	20.85	25.98	27.54	24.7	2.58	1.89	1.44	2.52	*	12.96	14.28	13.54	13.72	1.57	17.62	18.16	18.86	18.22	1.6	1.33	1.05	1.7	0	27.0833	0.79	0	0	0	0
AT1G67060	AT1G67060_at		chr1:25036616-25039389 FORWARD LENGTH=1084	unknown protein; FUNCTIONS IN: molecular_function unknown; INVOLVED IN: biological_process unknown; LOCATED IN: plasma membrane; EXPRESSED IN: 22 plant structures; EXPRESSED DURING: 13 growth stages; Has 283 Blast hits to 281 proteins in 136 species: Archae - 0; Bacteria - 145; Metazoa - 0; Fungi - 65; Plants - 41; Viruses - 0; Other Eukaryotes - 32 (source: NCBI BLink).	22.67	29.94	27.29	26.49	2.95	37.76	47.6	63.8	49.68	7.94	1.88	1.33	2.55	*	17.62	26.5	28.81	24.25	3.73	27.09	30.27	38.28	31.92	3.6	1.32	0.97	1.84	0	27.0677	-0.81	0	0	0	0
AT3G23920	AT3G23920_at	BAM1, BMY7, TR-BAMY	chr3:8641569-8644449 FORWARD LENGTH=2131	beta-amylase 1	65.45	71.53	60.5	65.73	4.37	127.17	146.23	108.37	127.29	11.86	1.94	1.59	2.33	*	66.61	93.93	93.94	84.65	9.62	106.69	144.16	123.99	124.6	11.71	1.47	1.16	1.89	0	27.044	1.02	0	0	0	0
AT1G72070	AT1G72070_at		chr1:27118621-27119708 REVERSE LENGTH=711	Chaperone DnaJ-domain superfamily protein	11.3	7.27	4.31	7.54	2.97	95.35	136.53	229.41	153.73	39.89	20.38	9.66	60.68	*	10.27	5.14	9.05	8.38	2.26	66.86	104.27	148.31	106.33	23.87	12.68	7.05	24.5	*	27.0186	0.52	0	0	0	0
AT4G03510	AT4G03510_at	RMA1, ATRMA1	chr4:1557120-1559428 REVERSE LENGTH=1632	RING membrane-anchor 1	14.74	8.99	14.75	12.82	2.15	52.21	55.98	66.98	58.44	4.72	4.56	3.43	6.43	*	4.8	11.58	12.99	9.73	2.83	32.43	38.9	39.28	36.81	2.51	3.78	2.51	7.3	*	26.8222	-0.79	0	0.485	0	0
AT4G27470	AT4G27470_at	ATRMA3, RMA3	chr4:13734999-13736518 FORWARD LENGTH=1102	RING membrane-anchor 3	206.92	226.64	207.19	213.15	9.14	402.43	551.17	570.16	508.12	54.19	2.38	1.94	2.85	*	181.58	347.74	339.5	289.45	54.77	551.91	508.22	580.11	545.99	22.5	1.89	1.42	2.75	*	26.8041	0.93	0	0	0	0
AT3G48530	AT3G48530_at	KING1	chr3:17987378-17989763 FORWARD LENGTH=1627	SNF1-related protein kinase regulatory subunit gamma 1	81.32	90.5	121.63	97.44	12.75	503.41	419.74	447.63	456.76	24.86	4.69	3.77	6.06	*	65.47	108.9	131.33	101.79	19.72	335.43	373.13	453.8	387.49	35.69	3.81	2.76	5.72	*	26.7905	0.68	0	0	0	0
AT3G20310	AT3G20310_at	ATERF-7, ATERF7, ERF7	chr3:7084806-7086805 REVERSE LENGTH=2000	ethylene response factor 7	251.03	210.88	261.86	241.37	16	349.87	348.13	443.96	380.59	32.44	1.58	1.31	1.88	*	175.99	230.06	223.85	209.57	18.28	224.51	240.83	331.36	264.8	34.07	1.26	0.96	1.62	0	26.7176	-0.96	0	0	0	0
AT5G46180	AT5G46180_at	DELTA-OAT	chr5:18718475-18721375 REVERSE LENGTH=1823	ornithine-delta-aminotransferase	110.04	107.91	78.9	98.92	10.55	311.93	395.26	323.6	343.63	27.16	3.47	2.81	4.36	*	127.14	139.36	167.66	144.41	12.69	333.98	340.75	356.03	343.9	9.81	2.38	2.06	2.8	*	26.6904	1.17	0	0	0	0
AT2G24240	AT2G24240_at		chr2:10310648-10312328 FORWARD LENGTH=1681	BTB/POZ domain with WD40/YVTN repeat-like protein	13.47	20.45	13.19	15.49	2.92	26.62	27.94	32.06	28.72	2.61	1.85	1.35	2.75	*	10.18	16.36	13.34	13.25	2.27	15.25	19.16	19.87	18.06	2.02	1.36	0.99	1.97	0	26.6667	-0.75	0	0	0	0
AT4G35750	AT4G35750_at		chr4:16940507-16941862 REVERSE LENGTH=1155	SEC14 cytosolic factor family protein / phosphoglyceride transfer family protein	122.01	104.09	140.29	122.3	11.03	354.49	289.24	373.05	339.12	26.05	2.77	2.29	3.39	*	95.49	118.95	106.36	107.14	8.2	184.02	235.13	271.3	229.64	26.8	2.14	1.68	2.67	*	26.6376	-0.94	0	0	0	0
AT3G18035	AT3G18035_at	HON4	chr3:6169090-6171724 REVERSE LENGTH=1903	winged-helix DNA-binding transcription factor family protein	456.16	396.35	366.06	406.28	28.78	1306.73	1239.27	1128.1	1224.95	56.26	3.02	2.63	3.48	*	446.44	531.1	351.45	441.14	56	1088.25	993.15	1035.87	1037.26	34.58	2.35	1.93	2.99	*	26.616	0.84	0	0	0	0
AT2G36220	AT2G36220_at		chr2:15192480-15193698 FORWARD LENGTH=1219	unknown protein; BEST Arabidopsis thaliana protein match is: unknown protein (TAIR:AT3G52710.1); Has 74 Blast hits to 74 proteins in 10 species: Archae - 0; Bacteria - 0; Metazoa - 0; Fungi - 0; Plants - 74; Viruses - 0; Other Eukaryotes - 0 (source: NCBI BLink).	42.03	59.65	53.83	51.53	6.14	100.53	111.59	157.9	123.27	17.92	2.39	1.73	3.25	*	30.51	49.09	44.06	41.2	5.92	65.64	77.81	61.33	68.03	5.67	1.65	1.27	2.22	*	26.5896	-0.92	0	0	0	0
AT1G28330	AT1G28330_at		chr1:9934134-9935266 REVERSE LENGTH=428	dormancy-associated protein-like 1	26.28	17.63	36.02	26.61	5.6	496.56	420.29	540.54	485.56	35.3	18.25	13.19	28.27	*	22.7	16.91	33.36	24.3	5.28	290.68	319.15	466.37	358.68	54.77	14.76	9.69	24.16	*	26.5353	-0.65	0	0.4	0	0
AT3G07880	AT3G07880_at	SCN1	chr3:2513971-2515823 FORWARD LENGTH=1206	Immunoglobulin E-set superfamily protein	103.19	92.08	101.07	98.78	4.5	216.64	188.69	194.05	199.53	9.5	2.02	1.81	2.25	*	99.43	104.59	108.02	103.61	4.63	152.12	144.43	178.45	158.33	10.75	1.53	1.33	1.74	*	26.5193	0.94	0	0	0	0
AT4G32070	AT4G32070_at	Phox4	chr4:15504662-15507176 REVERSE LENGTH=2515	Octicosapeptide/Phox/Bem1p (PB1) domain-containing protein / tetratricopeptide repeat (TPR)-containing protein	26.03	20.93	21.24	22.39	2.68	35.04	34.47	36.53	35.46	2.13	1.58	1.29	2.01	*	42.55	42.02	41.25	41.89	1.88	43.71	47.22	44.71	45.12	2.79	1.08	0.95	1.22	0	26.3566	1.54	*	0	0	0
AT2G18700	AT2G18700_at	ATTPS11, TPS11, ATTPSB	chr2:8109043-8112010 FORWARD LENGTH=2800	trehalose phosphatase/synthase 11	6.97	7.85	6.29	7.04	1.17	114.15	164.07	155.66	144.54	16.48	20.54	14.93	29.5	*	7.5	10.26	7.65	8.54	1.76	129.9	119.61	131.59	126.7	4.52	14.83	11.01	22.48	*	26.2559	0.75	0	0	0	0.464
AT4G18740	AT4G18740_at		chr4:10303414-10304572 REVERSE LENGTH=867	Rho termination factor	16.76	19.24	13.49	16.55	2.02	35.85	30.9	40.86	35.81	3.48	2.16	1.68	2.83	*	12.83	14.88	15.29	14.25	1.22	32.34	16.14	34.27	27.54	5.8	1.93	1.24	2.7	*	26.1905	-0.9	0	0	0	0
AT4G00355	AT4G00355_at		chr4:154705-156376 FORWARD LENGTH=1293	unknown protein; BEST Arabidopsis thaliana protein match is: unknown protein (TAIR:AT2G45980.1); Has 100 Blast hits to 97 proteins in 16 species: Archae - 0; Bacteria - 0; Metazoa - 0; Fungi - 0; Plants - 100; Viruses - 0; Other Eukaryotes - 0 (source: NCBI BLink).	157.61	158.65	151.96	156.02	4.36	340.97	319.65	318.11	325.54	9.27	2.09	1.95	2.23	*	152.91	229.28	179.97	187.25	23.12	307.23	325.84	374.05	335.52	21.28	1.79	1.44	2.29	*	26.1538	0.95	0	0	0	0
AT1G25275	AT1G25275_at		chr1:8860671-8861364 FORWARD LENGTH=481	unknown protein; FUNCTIONS IN: molecular_function unknown; INVOLVED IN: response to karrikin; LOCATED IN: endomembrane system; EXPRESSED IN: 23 plant structures; EXPRESSED DURING: 13 growth stages; Has 18 Blast hits to 18 proteins in 4 species: Archae - 0; Bacteria - 0; Metazoa - 0; Fungi - 0; Plants - 18; Viruses - 0; Other Eukaryotes - 0 (source: NCBI BLink).	192.28	197.68	240.52	209.77	16.14	439.63	563.96	648.06	550.13	61.93	2.62	2.07	3.26	*	218.32	309.48	353.96	293.25	41.18	484.57	611.19	669.52	588.28	56.1	2.01	1.53	2.71	*	26.087	1.05	0	0	0	0
AT3G03880	AT3G03880_at		chr3:997797-999261 FORWARD LENGTH=1007	Protein of unknown function (DUF1639)	39.4	30.98	42.43	37.6	3.65	67.1	75.8	75.83	72.88	4.08	1.94	1.62	2.35	*	27.55	31.53	41.79	33.44	4.71	44.98	51.97	65.14	53.94	6.28	1.61	1.2	2.21	0	25.9259	-0.86	0	0	0	0
AT5G65910	AT5G65910_at		chr5:26361440-26363460 REVERSE LENGTH=1570	BSD domain-containing protein	129.35	133.94	95.69	119.31	13.06	331.68	295.65	261.25	296.18	20.89	2.48	2.02	3.11	*	170.37	233.86	193.33	199.24	19.48	348.61	362.59	337.45	350.08	9.75	1.76	1.5	2.11	*	25.7426	1.31	*	0	0	0
AT3G10740	AT3G10740_at	ASD1, ARAF1, ARAF, ATASD1	chr3:3360888-3365414 REVERSE LENGTH=2478	alpha-L-arabinofuranosidase 1	54.87	59.62	43.38	52.99	6.3	311.19	352.26	366.17	343.08	18.27	6.47	5.29	8.17	*	59.32	95.67	89.63	81.44	12.12	388.78	396.62	413.95	399.7	9.77	4.91	3.93	6.51	*	25.7089	1.1	0	0	0	0
AT1G22890	AT1G22890_at		chr1:8102818-8103532 FORWARD LENGTH=559	unknown protein; FUNCTIONS IN: molecular_function unknown; INVOLVED IN: biological_process unknown; LOCATED IN: endomembrane system; EXPRESSED IN: 19 plant structures; EXPRESSED DURING: 11 growth stages; Has 17 Blast hits to 17 proteins in 2 species: Archae - 0; Bacteria - 0; Metazoa - 0; Fungi - 0; Plants - 17; Viruses - 0; Other Eukaryotes - 0 (source: NCBI BLink).	36.99	26.45	38.11	33.96	3.87	506.88	348.92	427.23	427.59	45.42	12.59	9.73	16.37	*	21.51	44.54	44.12	36.65	7.92	319.61	368.19	472.45	386.87	45.47	10.56	7.26	16.9	*	25.3854	0.68	0	0	0	0
AT1G77210	AT1G77210_at	STP14, AtSTP14	chr1:29008939-29012096 REVERSE LENGTH=2055	sugar transporter 14	22.12	17.72	33.51	24.84	5.25	136.88	140.97	278.36	185.42	46.63	7.47	4.07	12.91	*	9.77	17.51	20.83	16	3.82	61.27	68.81	101.45	76.94	12.73	4.81	3.04	8.34	*	25.3071	-0.91	0	0	0	0
AT1G04440	AT1G04440_at	CKL13	chr1:1202255-1205803 FORWARD LENGTH=2106	casein kinase like 13	172.41	192.96	183.09	182.35	8.46	428.85	387.53	377.19	397.27	19.27	2.18	1.95	2.43	*	194.28	227.36	260.26	227.83	20.47	450.65	395.27	361.22	400.59	27.72	1.76	1.46	2.13	*	25.1282	1.05	0	0	0	0
AT3G51130	AT3G51130_at		chr3:18994141-18997589 FORWARD LENGTH=1571	unknown protein; CONTAINS InterPro DOMAIN/s: Uncharacterised protein family UPF0183 (InterPro:IPR005373); Has 269 Blast hits to 265 proteins in 123 species: Archae - 0; Bacteria - 0; Metazoa - 131; Fungi - 82; Plants - 37; Viruses - 0; Other Eukaryotes - 19 (source: NCBI BLink).	86.87	101.54	108.36	98.8	7.71	244.17	219.15	266.38	242.95	14.31	2.46	2.1	2.9	*	83.31	115.76	123.14	107.3	12.85	193.44	205.96	220.9	206.8	9.15	1.93	1.58	2.43	*	24.7619	0.85	0	0	0	0
AT1G27150	AT1G27150_at		chr1:9429047-9432274 FORWARD LENGTH=1743	Tetratricopeptide repeat (TPR)-like superfamily protein	39.82	29.19	27.25	32.24	4.21	127.93	128.71	130.15	128.97	3.42	4	3.28	5.11	*	28.78	52.37	53.38	44.84	8.3	138.23	138.81	168.27	148.24	10.27	3.31	2.47	4.82	*	24.6951	0.92	0	0	0	0
AT1G23390	AT1G23390_at		chr1:8309112-8310649 REVERSE LENGTH=1538	Kelch repeat-containing F-box family protein	26.24	35	23.54	27.88	4.56	126.41	164.15	299.69	197.13	53.22	7.07	3.77	11.48	*	13.28	29.06	35.96	26.26	7.29	94.96	119.11	205.2	139.57	33.75	5.32	2.84	10.59	*	24.6684	-0.65	0	0	0	0
AT3G17410	AT3G17410_at		chr3:5955909-5959106 FORWARD LENGTH=1480	Protein kinase superfamily protein	329.85	380.19	281.92	330.22	30.94	560.44	531.33	502.97	532.29	19.12	1.61	1.38	1.92	*	348.96	420.68	349.62	373.72	26.3	463.05	558.5	410.19	478.26	46.44	1.28	1.04	1.55	0	24.6377	0.94	0	0	0	0
AT3G11100	AT3G11100_at		chr3:3476187-3477405 REVERSE LENGTH=1138	sequence-specific DNA binding transcription factors	32.13	28.64	29.67	30.27	2.12	73.9	56.88	74.6	68.47	5.96	2.26	1.87	2.71	*	21.57	24.08	30.04	25.35	2.96	38.29	47.01	57.93	47.69	6	1.88	1.41	2.5	*	24.5989	-0.96	0	0	0	0
AT2G25200	AT2G25200_at		chr2:10736483-10737654 REVERSE LENGTH=1172	Plant protein of unknown function (DUF868)	21.64	25.64	30.32	25.93	3.25	145.89	215.73	211.83	191.29	23.31	7.38	5.51	9.9	*	10.03	26.11	26.96	20.99	5.79	115.32	139.54	132.9	129.11	8.04	6.15	4.16	11.32	*	24.5009	-0.79	0	0	0	0
AT1G32700	AT1G32700_at		chr1:11827433-11829759 FORWARD LENGTH=1112	PLATZ transcription factor family protein	171.09	210.1	153.03	178.47	18.4	428.63	425.4	408.3	420.37	11.56	2.36	2	2.85	*	164.59	271.99	219.48	218.42	32	373.62	465.85	432.29	423.58	29.21	1.94	1.51	2.6	*	24.5	0.89	0	0	0	0
AT2G07180	AT2G07180_at		chr2:2980899-2983495 REVERSE LENGTH=1736	Protein kinase superfamily protein	93.48	110.59	116.11	106.55	7.79	340.95	238.77	220.59	266.68	37.41	2.5	1.88	3.2	*	63.55	132.63	101.51	99.11	20.43	162.98	246.04	202.31	203.6	25.12	2.05	1.42	3.22	*	24.4681	-0.78	0	0	0	0
AT5G43320	AT5G43320_at	ckl8	chr5:17385867-17389527 REVERSE LENGTH=2205	casein kinase I-like 8	218.49	250.92	224.09	231.13	12.38	540.65	384.11	347.45	422.93	59.76	1.83	1.39	2.3	*	241.92	304.66	292.05	278.92	21.33	342.53	325.15	336.04	334.02	10.04	1.2	1.05	1.38	0	24.4604	1.03	0	0	0	0
AT2G44130	AT2G44130_at		chr2:18253610-18255054 FORWARD LENGTH=1445	Galactose oxidase/kelch repeat superfamily protein	16.58	13.81	20.79	17.09	2.54	213.3	216.88	293.62	241.42	26.81	14.13	10.49	19.57	*	14.48	24.06	22.23	20.04	3.45	180.32	228.62	340.73	249.68	47.88	12.46	7.93	19.17	*	24.4042	0.79	0	0.0108	0	0
AT5G58650	AT5G58650_at	PSY1	chr5:23699708-23700226 REVERSE LENGTH=439	plant peptide containing sulfated tyrosine 1	114.07	87.64	97.76	99.24	8.59	227.48	308.58	526.03	354.03	89.69	3.57	2.05	5.23	*	64.41	90.44	108.55	87.64	13.61	156.42	179.58	255.28	197.1	30.57	2.25	1.55	3.26	*	24.3902	-0.86	0	0	0	0
AT1G30820	AT1G30820_at		chr1:10944913-10949458 REVERSE LENGTH=2480	CTP synthase family protein	62.01	29.98	71.58	54.35	12.74	167.49	183.01	182.1	177.37	6.23	3.26	2.34	5.33	*	36.88	46.19	72.1	51.68	10.87	132.74	117.75	121.47	124.29	4.96	2.4	1.77	3.69	*	24.359	-0.6	0	0	0	0
AT1G80940	AT1G80940_at		chr1:30410701-30412289 FORWARD LENGTH=1246	unknown protein; Has 30201 Blast hits to 17322 proteins in 780 species: Archae - 12; Bacteria - 1396; Metazoa - 17338; Fungi - 3422; Plants - 5037; Viruses - 0; Other Eukaryotes - 2996 (source: NCBI BLink).	140.96	116.68	110.67	122.88	9.39	203.46	182.22	212.41	199.34	9.68	1.62	1.4	1.89	*	111.07	134.17	160.25	134.83	14.79	165.29	163.54	202.33	177.28	13.09	1.31	1.06	1.65	0	24.2857	0.87	0	0	0	0
AT2G40420	AT2G40420_at		chr2:16877223-16879214 FORWARD LENGTH=1632	Transmembrane amino acid transporter family protein	206.44	171.18	252.69	210.12	24.05	704.33	695.43	998.55	799.29	100.1	3.8	2.85	5.03	*	97.25	144.05	154.8	131.72	18.81	357.28	326.34	450.61	377.36	38.73	2.86	2.16	3.9	*	24.2105	-1.19	0	0	0	0
AT3G13430	AT3G13430_at		chr3:4367181-4368861 FORWARD LENGTH=1385	RING/U-box superfamily protein	16.62	17.59	16.92	16.98	1.7	27.31	30.77	45.37	34.35	5.82	2.02	1.41	2.75	*	17.04	19.68	16.48	17.82	1.6	19.12	29.22	30.15	26.04	3.89	1.46	1.07	1.92	0	24.1135	0.84	0	0	0	0
AT4G13830	AT4G13830_at	J20	chr4:8011424-8012163 FORWARD LENGTH=740	DNAJ-like 20	362.12	315.47	344.64	344.63	16.06	1160.54	1341.75	1431.79	1308.84	84.46	3.8	3.32	4.32	*	177.44	362.09	457.63	331.52	83.69	1168.52	1120.52	1310.63	1198.35	60.35	3.61	2.52	6.21	*	24.0964	-0.73	0	0	0	0.529
AT4G19860	AT4G19860_at		chr4:10777512-10780461 REVERSE LENGTH=1952	alpha/beta-Hydrolases superfamily protein	183.62	209.68	183.49	191.32	10.63	782.84	732.28	497.09	670.21	89.03	3.5	2.7	4.37	*	169.27	302.06	294.7	255.37	43.97	707.6	755.29	607.71	690.45	45.47	2.7	2.05	3.83	*	24.0741	0.95	0	0	0	0
AT1G67070	AT1G67070_at	DIN9, PMI2	chr1:25042135-25044647 FORWARD LENGTH=1750	Mannose-6-phosphate isomerase, type I	26.58	24.11	20.15	23.64	2.26	43.52	35.46	40.82	39.82	3.12	1.68	1.38	2.08	*	30.19	30.99	37.26	32.81	2.75	38.12	41.31	40.52	39.95	1.88	1.22	1.05	1.44	0	23.913	1.13	0	0	0	0
AT5G23340	AT5G23340_at		chr5:7856189-7858319 FORWARD LENGTH=1679	RNI-like superfamily protein	36.07	26.85	37.61	33.42	3.7	84.57	79.41	88.91	84.44	3.63	2.53	2.1	3.12	*	26.62	48.72	48.56	41.21	7.75	81.65	86.19	95.97	87.81	4.94	2.13	1.6	3.11	*	23.8095	0.82	0	0	0	0
AT4G33666	AT4G33666_at		chr4:16169048-16169535 FORWARD LENGTH=488	unknown protein; FUNCTIONS IN: molecular_function unknown; INVOLVED IN: biological_process unknown; LOCATED IN: chloroplast; EXPRESSED IN: 19 plant structures; EXPRESSED DURING: 11 growth stages; Has 30201 Blast hits to 17322 proteins in 780 species: Archae - 12; Bacteria - 1396; Metazoa - 17338; Fungi - 3422; Plants - 5037; Viruses - 0; Other Eukaryotes - 2996 (source: NCBI BLink).	29.94	23.81	48.12	33.69	7.7	117.04	371.76	314.32	267.58	77.94	7.94	3.87	14.62	*	12.25	39.42	55.83	35.7	13.16	138.07	180.77	235.49	184.72	28.59	5.17	2.95	13.42	*	23.7726	0.4	0	0	0	0
AT5G49700	AT5G49700_at		chr5:20192599-20193429 FORWARD LENGTH=831	Predicted AT-hook DNA-binding family protein	100.96	110.12	69.38	94.06	14.33	394.77	739.23	860.7	664.35	141.54	7.06	4.36	10.71	*	126.69	124.65	135.64	128.36	6.11	662.29	417.58	568.47	548.95	71.35	4.28	3.33	5.28	*	23.6239	1.07	0	0	0	0
AT2G26800	AT2G26800_at		chr2:11429022-11432728 REVERSE LENGTH=1650	Aldolase superfamily protein	100.35	92.15	93.26	95.87	4.12	140.68	153.36	146.76	146.84	5.46	1.53	1.4	1.68	*	69.21	85.26	87.05	80.34	6.35	104.76	95.1	96.84	99.05	3.92	1.23	1.07	1.44	0	23.5714	-1.03	0	0	0	0
AT3G61310	AT3G61310_at		chr3:22690596-22692834 REVERSE LENGTH=1657	AT hook motif DNA-binding family protein	69.33	80.49	72.22	74.02	4.63	108.59	95.34	121.67	108.2	8.24	1.46	1.24	1.72	*	93.05	56.52	78.9	76.24	10.7	96.59	87.95	85.96	90.39	4.47	1.19	0.95	1.56	0	23.3871	0.78	0	0	0	0
AT5G05440	AT5G05440_at	PYL5, RCAR8	chr5:1609250-1610446 FORWARD LENGTH=1197	Polyketide cyclase/dehydrase and lipid transport superfamily protein	80.48	106.73	82.78	89.86	9.7	481.24	507.75	725.44	571.81	78.23	6.36	4.71	8.44	*	63.85	85	80.07	76.26	7.49	317.24	320.14	444.19	359.38	43.53	4.71	3.61	6.07	*	23.3546	-0.92	0	0	0	0
AT1G48620	AT1G48620_at	HON5	chr1:17973697-17976389 REVERSE LENGTH=1979	high mobility group A5	92.79	88.37	81.89	88.46	5.38	152.04	168.73	189.1	171.48	13.85	1.94	1.63	2.28	*	84.22	98.18	105.78	95.48	7.8	150.24	123.18	170.93	147.79	14.46	1.55	1.25	1.91	*	23.3129	0.91	0	0	0	0
AT5G37710	AT5G37710_at		chr5:14979159-14981400 FORWARD LENGTH=1311	alpha/beta-Hydrolases superfamily protein	33.53	43.42	32.4	36.39	4.58	128.07	133.2	151.03	137.3	7.63	3.77	3.05	4.83	*	45.41	43.31	47.13	45.61	2.51	121.93	120.07	114.03	118.34	4.16	2.59	2.34	2.9	*	23.2787	1.01	0	0	0	0
AT5G16480	AT5G16480_at		chr5:5381113-5382897 REVERSE LENGTH=1115	Phosphotyrosine protein phosphatases superfamily protein	34.94	21.74	46.05	33.82	7.4	86.48	91.13	116.53	97.94	10.18	2.9	2.02	4.64	*	14.51	33.16	28.1	25.12	6.09	55.53	48.35	64.82	56.38	4.87	2.24	1.55	3.79	*	23.2673	-0.77	0	0	0	0
AT5G04760	AT5G04760_at		chr5:1373530-1374787 REVERSE LENGTH=1128	Duplicated homeodomain-like superfamily protein	37.6	48.14	39.99	41.84	4.08	64.89	60.99	69.06	64.75	3.76	1.55	1.29	1.88	*	31.16	34.82	30.68	32.47	2.15	38.78	44.95	34.03	39.24	3.81	1.21	0.99	1.46	0	23.2558	-1.05	0	0	0	0
AT4G30790	AT4G30790_at		chr4:14993086-14997785 REVERSE LENGTH=3744	INVOLVED IN: autophagy; EXPRESSED IN: 24 plant structures; EXPRESSED DURING: 15 growth stages; CONTAINS InterPro DOMAIN/s: Autophagy-related protein 17 (InterPro:IPR007240), Autophagy-related protein 11 (InterPro:IPR019460); Has 8793 Blast hits to 6268 proteins in 570 species: Archae - 89; Bacteria - 657; Metazoa - 4844; Fungi - 808; Plants - 441; Viruses - 15; Other Eukaryotes - 1939 (source: NC…	132.45	137.15	108.46	125.92	9.37	299.19	330.02	250.35	293.57	24.19	2.33	1.94	2.8	*	213.03	286.03	270.58	256.51	22.96	484.07	466.47	404.12	451.46	24.86	1.76	1.49	2.11	*	23.1959	1.67	*	0	0	0
AT1G07110	AT1G07110_at	F2KP, ATF2KP, FKFBP	chr1:2178104-2184148 REVERSE LENGTH=2662	fructose-2,6-bisphosphatase	192.87	171.65	136.85	167.47	16.9	306.78	284.95	247.22	279.3	18.62	1.67	1.38	2.05	*	213.46	295.71	277.25	262.32	26.78	332.34	353.52	308.63	331.46	15.33	1.26	1.06	1.54	0	23.1884	1.23	*	0	0	0
AT1G80460	AT1G80460_at	NHO1, GLI1	chr1:30246745-30249305 REVERSE LENGTH=1914	Actin-like ATPase superfamily protein	32.23	32.4	31.66	32.11	1.93	57.97	50.9	59.31	55.89	3.49	1.74	1.51	2.01	*	28.45	42.13	46.56	39.01	5.88	56.08	55.98	61.2	57.49	2.63	1.47	1.16	1.98	0	23.1788	0.9	0	0	0	0
AT3G43230	AT3G43230_at		chr3:15207367-15209825 FORWARD LENGTH=1864	RING/FYVE/PHD-type zinc finger family protein	104.23	99.76	116.57	106.35	6.01	189.46	220.27	214.09	208.15	10.57	1.96	1.73	2.22	*	86.51	114.08	110.79	103.68	9.22	150.51	185.62	162.1	165.67	11.28	1.6	1.33	1.93	*	23.1214	-0.87	0	0	0	0
AT5G18490	AT5G18490_at		chr5:6134152-6136765 REVERSE LENGTH=1996	Plant protein of unknown function (DUF946)	31.88	53.97	47.94	44.39	7.38	135.46	126.63	145.84	136.34	6.65	3.07	2.38	4.26	*	28.52	46.47	48.88	41.1	6.87	82.27	107.56	119.82	103.14	11.6	2.51	1.83	3.6	*	23.1092	-0.72	0	0	0	0
AT1G26665	AT1G26665_at		chr1:9214174-9215552 FORWARD LENGTH=794	Mediator complex, subunit Med10	106.49	87.21	100.7	98.5	8.03	251.95	277.57	375.06	301.84	38.82	3.06	2.34	3.9	*	70.51	88.54	113.18	90.5	13.13	217.63	196.27	366.73	259.99	53.97	2.87	1.8	4.29	*	23.0769	-0.84	0	0	0	0
AT2G45850	AT2G45850_at		chr2:18871479-18873684 REVERSE LENGTH=1696	AT hook motif DNA-binding family protein	50.95	36.66	58.82	48.89	6.85	103.99	110.97	116.19	110.11	5.22	2.25	1.8	2.96	*	37.28	45.55	80.83	54.37	13.64	104.91	99.95	124.56	109.49	8	2.01	1.39	3.46	*	22.7778	0.63	0	0	0	0
AT1G69570	AT1G69570_at		chr1:26161528-26163496 REVERSE LENGTH=1709	Dof-type zinc finger DNA-binding family protein	7.61	11.51	8.36	9.25	1.87	100.68	80.8	94.82	92.11	6	9.96	7.31	15.08	*	6.62	6.37	9.4	7.33	1.59	58.27	53.93	105.18	72.36	16.55	9.88	5.65	16.97	*	22.7086	-0.76	0	0	0	0
AT3G23700	AT3G23700_at		chr3:8531429-8533788 REVERSE LENGTH=1485	Nucleic acid-binding proteins superfamily	440.55	258.15	466.89	388.63	65.28	677.66	679.08	633.08	664.12	19.34	1.71	1.33	2.37	*	247.58	436.82	510.36	397.96	79.44	650.14	485.4	567.48	567.51	47.45	1.43	1.03	2.16	0	22.5564	0.64	0	0	0	0
AT3G52060	AT3G52060_at		chr3:19310532-19312286 REVERSE LENGTH=1668	Core-2/I-branching beta-1,6-N-acetylglucosaminyltransferase family protein	75.8	74.97	128.2	92.98	17.74	302.55	301.3	280.67	294.26	8.83	3.16	2.4	4.62	*	32.96	102.38	93.49	76.15	22.2	170.04	256.77	245.31	223.85	27.88	2.94	1.86	5.77	*	22.5	-0.71	0	0	0	0
AT1G70590	AT1G70590_at		chr1:26618321-26620388 FORWARD LENGTH=1367	F-box family protein	96.26	104.01	88.72	96	5.84	154.55	137.47	165.1	152.44	9.27	1.59	1.38	1.83	*	85.4	96.22	97.93	92.9	5.15	105.17	111.54	116.22	111.17	4.68	1.2	1.07	1.34	0	22.4638	-0.9	0	0	0	0
AT1G80190	AT1G80190_at	PSF1	chr1:30159077-30161654 FORWARD LENGTH=1437	partner of SLD five 1	50.74	58.18	54.54	54.44	4.1	126.37	127.13	127.14	126.95	3.79	2.33	2.05	2.68	*	56.18	66.29	45.36	55.96	6.6	98.33	120.08	114.68	110.81	8.04	1.98	1.59	2.52	*	22.439	0.8	0	0	0	0
AT1G53400	AT1G53400_at		chr1:19924752-19926631 FORWARD LENGTH=833	Ubiquitin domain-containing protein	192.67	173.35	191.49	186.12	8.5	506	465.66	585.15	519.14	35.4	2.79	2.43	3.18	*	172.7	185.21	212.32	189.39	12.87	452.55	366.59	558.99	459.13	55.93	2.42	1.89	3.02	*	22.2222	0.89	0	0	0	0
AT3G61260	AT3G61260_at		chr3:22675238-22676788 REVERSE LENGTH=891	Remorin family protein	123.93	95.8	122.39	113.68	11.4	523.84	390.82	559.92	491.29	51.58	4.32	3.39	5.5	*	77.44	87.05	104.04	89.46	10.31	311.62	247.36	350.55	302.98	30.5	3.39	2.64	4.39	*	22.1239	-0.99	0	0	0	0
AT3G53930	AT3G53930_at		chr3:19966352-19970813 FORWARD LENGTH=2558	Protein kinase superfamily protein	62.27	53	50.33	55.06	4.79	95.5	79.97	79.03	84.52	6.4	1.54	1.27	1.86	*	74.05	65.98	66.85	69.29	3.58	79.52	85.96	72.89	79.04	5.33	1.14	0.99	1.31	0	22.0472	1.07	0	0	0	0
AT1G32540	AT1G32540_at	LOL1	chr1:11767504-11769880 FORWARD LENGTH=1602	lsd one like 1	16.16	20.51	21.15	19.18	2.03	52.94	56.23	53.32	54.11	1.98	2.82	2.37	3.45	*	14.29	16.56	18.04	16.26	1.49	40.92	31.1	38.8	37.01	3.21	2.28	1.85	2.81	*	21.9409	-0.93	0	0	0	0
AT5G54640	AT5G54640_at	HTA1, RAT5, ATHTA1	chr5:22196477-22197492 FORWARD LENGTH=669	Histone superfamily protein	108.66	120.8	130.82	119.88	7.7	279.86	304.05	267.62	284.29	11.97	2.37	2.1	2.7	*	74.94	100.98	101.05	92.09	9.36	167.13	236.04	182.54	195.06	22.27	2.12	1.64	2.72	*	21.9048	-1.08	0	0	0	0
AT1G54680	AT1G54680_at		chr1:20413135-20414574 FORWARD LENGTH=881	unknown protein; FUNCTIONS IN: molecular_function unknown; INVOLVED IN: biological_process unknown; EXPRESSED IN: 22 plant structures; EXPRESSED DURING: 13 growth stages; BEST Arabidopsis thaliana protein match is: unknown protein (TAIR:AT5G27290.1); Has 30201 Blast hits to 17322 proteins in 780 species: Archae - 12; Bacteria - 1396; Metazoa - 17338; Fungi - 3422; Plants - 5037; Viruses - 0; Othe…	27.92	16.71	22.65	22.3	3.43	48.68	47.38	40.95	45.9	3.07	2.06	1.6	2.8	*	23.22	22.06	32.51	25.75	3.84	42.24	37.92	42.8	40.92	2.43	1.59	1.25	2.13	*	21.875	0.81	0	0	0	0
AT3G07370	AT3G07370_at	ATCHIP, CHIP	chr3:2358083-2360549 REVERSE LENGTH=1325	carboxyl terminus of HSC70-interacting protein	124.73	119.43	102.41	115.81	7.63	184.35	218.2	188.53	197.2	11.85	1.7	1.47	1.98	*	152.12	148.48	158.53	152.93	4.38	208.82	196.86	177.08	194.65	10.03	1.27	1.15	1.4	0	21.7687	1.18	0	0	0	0
AT5G32450	AT5G32450_at		chr5:12079611-12081573 FORWARD LENGTH=1156	RNA binding (RRM/RBD/RNP motifs) family protein	144.7	147.89	135.75	142.29	5.67	443.47	326.74	343.89	370.96	36.51	2.61	2.16	3.07	*	177.05	172.69	168.51	172.7	5.13	325.35	299.4	314.16	312.79	9.29	1.81	1.69	1.94	*	21.7593	1.12	0	0	0	0
AT4G23730	AT4G23730_at		chr4:12362484-12365098 FORWARD LENGTH=1698	Galactose mutarotase-like superfamily protein	60.27	61.38	65.91	62.3	3.04	126	75.67	98.14	99.79	14.58	1.6	1.2	2.02	*	59.4	64.29	64.24	63.2	3.56	62.87	70.63	72.55	68.44	4.48	1.08	0.94	1.25	0	21.6667	0.9	0	0	0	0
AT1G16720	AT1G16720_at	HCF173	chr1:5723088-5726478 FORWARD LENGTH=2100	high chlorophyll fluorescence phenotype 173	90.25	68.84	99.52	86.17	9.31	154.23	236.24	185.88	191.93	24.96	2.23	1.67	2.93	*	77.15	142.76	170.08	129.56	28.27	245.24	225.87	224.29	232.09	8.56	1.79	1.31	2.8	*	21.5569	0.94	0	0	0	0
AT3G22260	AT3G22260_at		chr3:7870892-7873548 FORWARD LENGTH=1060	Cysteine proteinases superfamily protein	42.6	48.36	31.85	40.64	5.42	90.87	79.18	69.69	80.29	6.73	1.98	1.54	2.61	*	45.98	57.06	36.41	46.47	6.47	71.51	74.35	65.42	70.5	3.51	1.52	1.21	1.99	*	21.4286	0.83	0	0	0	0
AT3G07310	AT3G07310_at		chr3:2327818-2329801 REVERSE LENGTH=1470	Protein of unknown function (DUF760)	123.24	73.67	120.85	105.72	16.32	210.1	225.34	194.36	209.71	10.81	1.98	1.55	2.69	*	43.32	108.23	148.46	99.93	31.09	176.51	181.61	196.05	185.03	7.09	1.85	1.22	3.8	*	21.2903	-0.64	0	0	0	0
AT4G22820	AT4G22820_at		chr4:11987705-11989006 REVERSE LENGTH=925	A20/AN1-like zinc finger family protein	40.22	44.85	37.47	40.8	2.97	55.49	61.29	70.12	62.04	4.79	1.52	1.27	1.81	*	32.45	37.88	38.19	35.87	2.74	39.1	41.57	49.01	43.14	3.5	1.2	1	1.44	0	21.2598	-0.96	0	0	0	0
AT2G33390	AT2G33390_at		chr2:14151135-14153118 FORWARD LENGTH=1140	unknown protein; Has 34 Blast hits to 34 proteins in 10 species: Archae - 0; Bacteria - 0; Metazoa - 0; Fungi - 0; Plants - 34; Viruses - 0; Other Eukaryotes - 0 (source: NCBI BLink).	178.71	170.69	165.36	172.06	6.87	287.62	277.55	275.87	281.48	7.32	1.64	1.51	1.77	*	125.94	156.32	183.78	155.02	17.29	211	241.71	218.17	223.66	11.26	1.44	1.19	1.79	0	21.1921	-0.93	0	0	0	0
AT1G15800	AT1G15800_at		chr1:5441082-5443684 REVERSE LENGTH=1067	unknown protein; BEST Arabidopsis thaliana protein match is: unknown protein (TAIR:AT1G80610.1); Has 56 Blast hits to 52 proteins in 9 species: Archae - 0; Bacteria - 0; Metazoa - 0; Fungi - 0; Plants - 56; Viruses - 0; Other Eukaryotes - 0 (source: NCBI BLink).	83.48	77.81	103.75	88.33	8.33	423.17	410.27	606.51	479.47	64.07	5.43	4.08	7.05	*	47.8	70.26	99.17	72.26	15.32	280.16	325.03	482.67	362.49	61.93	5.02	3.22	8.21	*	21.0784	-0.87	0	0	0	0
AT1G08720	AT1G08720_at	EDR1, ATEDR1	chr1:2774030-2779297 FORWARD LENGTH=3081	Protein kinase superfamily protein	52.07	43.75	43.32	46.34	3.62	111.33	107.41	78.91	99.28	10.67	2.14	1.71	2.65	*	57.42	78.59	78.29	71.1	7.91	142.03	118.95	104.15	121.81	11.36	1.71	1.35	2.19	*	21.0526	1.21	*	0	0	0
AT4G14990	AT4G14990_at		chr4:8565622-8569814 REVERSE LENGTH=3304	Topoisomerase II-associated protein PAT1	135.43	114.96	116.76	122.56	7.35	224.86	212.11	230.8	223.04	7.93	1.82	1.63	2.05	*	127.93	172.2	205.22	168.46	22.85	276.56	259.45	265.86	267.19	7.39	1.59	1.29	2.05	*	20.8589	1.05	0	0	0	0
AT3G11620	AT3G11620_at		chr3:3669319-3671839 REVERSE LENGTH=1276	alpha/beta-Hydrolases superfamily protein	51.32	37.06	48.04	45.58	4.45	72.24	59.63	103.23	78.29	13.26	1.72	1.2	2.32	*	46.47	50.9	49.16	49.02	2.79	55.57	47.46	62.78	55.19	4.7	1.13	0.95	1.33	0	20.8333	0.9	0	0	0	0
AT4G13530	AT4G13530_at		chr4:7866719-7868742 FORWARD LENGTH=1089	unknown protein; BEST Arabidopsis thaliana protein match is: unknown protein (TAIR:AT4G10080.1); Has 30201 Blast hits to 17322 proteins in 780 species: Archae - 12; Bacteria - 1396; Metazoa - 17338; Fungi - 3422; Plants - 5037; Viruses - 0; Other Eukaryotes - 2996 (source: NCBI BLink).	84.08	129.24	77.93	96.3	17.94	162.42	164.12	139.21	154.98	9.75	1.61	1.2	2.35	*	52.2	110.35	99.46	87.11	18.46	93.26	154.38	126.95	125.3	18.97	1.44	0.95	2.32	0	20.8333	-0.69	0	0	0	0
AT5G63470	AT5G63470_at	NF-YC4	chr5:25415701-25417098 REVERSE LENGTH=1103	nuclear factor Y, subunit C4	35.18	19.05	40.8	31.64	6.69	137.81	165.99	157.01	153.24	9.81	4.84	3.52	7.5	*	11.61	26.1	35.17	24.21	7.07	103.08	101.83	95.5	100.75	3.9	4.16	2.79	8.02	*	20.7386	-0.73	0	0	0	0
AT1G15010	AT1G15010_at		chr1:5171207-5171742 FORWARD LENGTH=536	unknown protein; BEST Arabidopsis thaliana protein match is: unknown protein (TAIR:AT2G01300.1); Has 71 Blast hits to 71 proteins in 13 species: Archae - 0; Bacteria - 2; Metazoa - 0; Fungi - 0; Plants - 69; Viruses - 0; Other Eukaryotes - 0 (source: NCBI BLink).	33.99	47.91	46.78	42.91	6.48	370.91	454.86	674.23	499.47	91.77	11.64	7.64	17.17	*	32.58	58.2	66.86	52.43	11.16	448.42	373.34	557.43	459.97	53.96	8.77	6.06	13.94	*	20.6806	0.75	0	0	0	0
AT2G24550	AT2G24550_at		chr2:10427856-10429222 REVERSE LENGTH=1113	unknown protein; BEST Arabidopsis thaliana protein match is: unknown protein (TAIR:AT4G31510.1); Has 219 Blast hits to 219 proteins in 33 species: Archae - 0; Bacteria - 0; Metazoa - 16; Fungi - 2; Plants - 184; Viruses - 0; Other Eukaryotes - 17 (source: NCBI BLink).	18.09	20.17	23.03	20.14	3.65	162.38	156.34	162.8	160.32	4.4	7.96	6.1	11.37	*	15.82	21.56	24.08	20.39	3.44	121.28	130.6	131.3	127.23	5.11	6.24	4.84	8.68	*	20.6557	0.67	0	0	0	1.982
AT4G26400	AT4G26400_at		chr4:13344808-13346597 REVERSE LENGTH=1470	RING/U-box superfamily protein	14.68	24.83	25.82	21.66	4.01	76.11	76.49	69.18	73.81	3.45	3.41	2.58	4.93	*	15.85	22.94	18.95	19.15	2.45	42.43	58.89	52.46	51.27	5.33	2.68	2.05	3.55	*	20.5426	-0.75	0	0	0	0
AT3G45970	AT3G45970_at	ATEXLA1, EXPL1, ATEXPL1, ATHEXP BETA 2.1, EXLA1	chr3:16896166-16897308 FORWARD LENGTH=989	expansin-like A1	96.08	135.48	107.78	112.9	13.49	548.95	436.77	525.36	503.43	34.48	4.46	3.59	5.68	*	87.5	64.92	97.77	83.44	10.21	302.89	275.67	286.31	289.73	10.65	3.47	2.86	4.38	*	20.3343	-1.02	0	0	0	0
AT2G44790	AT2G44790_at	UCC2	chr2:18461906-18463309 REVERSE LENGTH=962	uclacyanin 2	15.58	18.16	21.28	18.18	2.23	78.6	49.52	168.32	98.84	35.72	5.44	2.17	9.16	*	11	16.46	19.26	15.36	3	46	33.31	89.7	56.23	17.23	3.66	1.73	6.43	*	20.2765	-0.83	0	0	0	4.905
AT1G55960	AT1G55960_at		chr1:20927643-20930017 REVERSE LENGTH=1723	Polyketide cyclase/dehydrase and lipid transport superfamily protein	192.14	180.5	198.75	189.98	8.65	431.24	388.4	395.84	404.98	14.84	2.13	1.94	2.35	*	198.34	201.85	199.89	200.1	8.07	383.03	340.6	324.96	349.03	19.39	1.74	1.55	1.95	*	20.1031	0.95	0	0	0	0
AT1G32170	AT1G32170_at	XTR4, XTH30	chr1:11575320-11577927 FORWARD LENGTH=1297	xyloglucan endotransglucosylase/hydrolase 30	26.71	27.63	33.43	28.68	3.47	151.03	119.04	186.68	152.31	19.81	5.31	3.93	7.13	*	19.98	19.55	28.49	22.49	3.4	88	84.66	128.55	100.18	14.55	4.45	3.14	6.36	*	20.1018	-0.93	0	0	0	0
AT4G22753	AT4G22753_at	SMO1-3, ATSMO1, SMO1, ATSMO1-3	chr4:11952019-11953609 REVERSE LENGTH=876	sterol 4-alpha methyl oxidase 1-3	111.45	111.06	137.58	120.52	10.18	210.8	224.89	212.42	216.64	9.58	1.8	1.55	2.12	*	72.55	100.84	102.35	90.95	13.88	126.4	168.98	155.72	149.63	14.67	1.65	1.24	2.27	*	20	-1.01	0	0	0	0
AT1G14330	AT1G14330_at		chr1:4890118-4892251 REVERSE LENGTH=2134	Galactose oxidase/kelch repeat superfamily protein	59.27	90.16	83.36	77.63	9.78	189.58	156.4	199.08	181.59	13.07	2.34	1.86	3.02	*	67.56	74.29	88.32	76.79	6.36	155.6	119.69	138.58	137.9	10.44	1.8	1.49	2.17	*	19.8925	-0.78	0	0	0	0
AT2G36320	AT2G36320_at		chr2:15228788-15230496 FORWARD LENGTH=1533	A20/AN1-like zinc finger family protein	56.26	50.02	75.58	60.51	8.28	354.83	318.38	396.67	356.55	22.97	5.89	4.67	7.74	*	33.16	49.34	51.16	44.22	6.58	191.73	209.99	291.2	230.82	30.97	5.22	3.75	7.36	*	19.7002	-0.98	0	0	0	0
AT5G65430	AT5G65430_at	GRF8, 14-3-3KAPPA, GF14 KAPPA	chr5:26148201-26150342 REVERSE LENGTH=1179	general regulatory factor 8	201.84	291.7	207.49	232.87	30.79	581.56	538.69	578.76	564.76	18.56	2.43	1.98	3.12	*	154.59	174.06	193.43	174.85	12.9	296.44	328.33	411.96	344.95	35.4	1.97	1.59	2.42	*	19.697	-1.02	0	0	0	0
AT1G68000	AT1G68000_at	ATPIS1, ATPIS, PIS1	chr1:25491014-25493053 FORWARD LENGTH=1005	phosphatidylinositol synthase 1	205.62	201.36	259.86	222.4	19.69	333.95	366.28	403.49	367.15	22.8	1.65	1.39	1.99	*	157.93	185.88	158.92	168.3	12.87	216.96	205.65	230.75	217.59	9.76	1.29	1.12	1.5	0	19.4245	-1.09	0	0	0	0
AT5G28050	AT5G28050_at		chr5:10043914-10045882 REVERSE LENGTH=1053	Cytidine/deoxycytidylate deaminase family protein	153	141.86	160.56	151.36	7.32	243.96	329.71	424.87	332.73	53.41	2.2	1.6	2.82	*	127.74	144.51	150.84	140.53	8.83	211.99	199.1	293.91	234.48	30.39	1.67	1.29	2.08	*	19.375	-0.95	0	0	0	0
AT1G26920	AT1G26920_at		chr1:9329512-9330398 FORWARD LENGTH=887	unknown protein; BEST Arabidopsis thaliana protein match is: unknown protein (TAIR:AT1G69760.1); Has 47 Blast hits to 47 proteins in 13 species: Archae - 0; Bacteria - 0; Metazoa - 0; Fungi - 7; Plants - 34; Viruses - 0; Other Eukaryotes - 6 (source: NCBI BLink).	63.22	56.68	76.49	65.5	6.73	257.16	231.54	248.49	244.77	9.09	3.74	3.16	4.54	*	66.09	85.96	96.14	82.59	9.26	258.13	246.59	246.3	251.17	7.62	3.04	2.55	3.75	*	19.3038	0.98	0	0	0	0
AT5G01750	AT5G01750_at		chr5:289765-290914 FORWARD LENGTH=1023	Protein of unknown function (DUF567)	464.32	528.06	499.68	495.2	22.61	900.92	796.2	852.44	849.19	31.62	1.71	1.56	1.89	*	533.13	621.94	613.67	589.91	30.46	791.1	813.79	844.15	813.58	22.29	1.38	1.26	1.52	*	19.2308	1.06	0	0	0	0
AT2G42040	AT2G42040_at		chr2:17543034-17545230 FORWARD LENGTH=1225	CONTAINS InterPro DOMAIN/s: WRC (InterPro:IPR014977); Has 219 Blast hits to 219 proteins in 19 species: Archae - 0; Bacteria - 0; Metazoa - 3; Fungi - 0; Plants - 215; Viruses - 0; Other Eukaryotes - 1 (source: NCBI BLink).	33.55	38.41	32.57	34.68	2.66	143.25	103.02	136.44	127.4	12.62	3.67	2.97	4.5	*	24.98	19.89	23.99	22.85	1.95	66.82	57.61	73.99	66.23	5.1	2.9	2.4	3.51	*	19.1919	-1.26	*	0	0	0
AT1G03550	AT1G03550_at		chr1:885623-887956 REVERSE LENGTH=1258	Secretory carrier membrane protein (SCAMP) family protein	51.04	71.19	44.5	55.3	8.86	258.49	290.31	263.8	271	12.17	4.9	3.83	6.7	*	90.97	93.04	66.34	83.59	9.24	391.73	372.76	261.33	341.81	41.19	4.09	3.1	5.36	*	19.0601	1.11	0	0	0	0
AT2G30250	AT2G30250_at	WRKY25, ATWRKY25	chr2:12903236-12905198 REVERSE LENGTH=1608	WRKY DNA-binding protein 25	108.2	163.08	81.52	118.07	24.85	314.69	324.88	323.92	321.49	6.95	2.72	2.02	4.17	*	109.12	193.04	150.92	150.88	24.94	314.36	373.75	292.49	327.03	25.81	2.17	1.64	3.04	*	18.8119	0.83	0	0	0	0
AT2G42890	AT2G42890_at	AML2, ML2	chr2:17849819-17854553 FORWARD LENGTH=3138	MEI2-like 2	36.15	50.23	36.05	40.59	5.71	336.1	291.15	265.13	297.42	21.06	7.33	5.75	9.74	*	42.15	60.08	68.89	56.9	8.25	307.64	344.11	351.71	334.16	15.33	5.87	4.67	7.78	*	18.7826	1	0	0	0	0
AT4G05060	AT4G05060_at		chr4:2590065-2592163 REVERSE LENGTH=1207	PapD-like superfamily protein	277.85	300.36	215.09	263.5	27.41	568.38	696.16	629.08	631	40.1	2.39	1.97	2.96	*	253.33	400.05	257.36	303.6	49.96	666.97	681.69	553.75	634.36	42.86	2.09	1.6	2.91	*	18.7817	0.81	0	0	0	0
AT5G61590	AT5G61590_at		chr5:24764438-24765324 REVERSE LENGTH=887	Integrase-type DNA-binding superfamily protein	130.96	133.23	142.63	135.54	5.29	510.26	441.11	541.31	497.98	30.56	3.67	3.25	4.13	*	58.22	171.51	157.01	128.73	36.23	464.18	526.71	515.85	501.49	22.89	3.9	2.64	7.28	*	18.7692	-0.72	0	0	0	0
AT1G72710	AT1G72710_at	CKL2	chr1:27372271-27376584 FORWARD LENGTH=2086	casein kinase 1-like protein 2	487.33	563.96	396.97	482.48	50.19	835.09	850.38	774.81	821.61	28.61	1.7	1.44	2.07	*	536.91	639.3	627.28	602.36	37.05	770.55	819.4	778.94	787.6	23.37	1.31	1.17	1.47	0	18.75	1.03	0	0	0	0
AT2G33120	AT2G33120_at	SAR1	chr2:14043459-14045544 REVERSE LENGTH=1104	synaptobrevin-related protein 1	95.93	84.42	100.64	93.09	7.29	127.42	132.69	149.16	135.67	9.58	1.46	1.23	1.74	*	74.35	63.64	86.06	74.3	7.29	87.06	85.71	119.07	96.73	11.77	1.3	1	1.68	0	18.6992	-1.02	0	0	0	0
AT3G60510	AT3G60510_at		chr3:22356952-22360147 REVERSE LENGTH=1539	ATP-dependent caseinolytic (Clp) protease/crotonase family protein	26.97	26.74	30.22	27.94	1.8	42.52	40.61	47.82	43.72	2.91	1.56	1.34	1.82	*	24.26	27.87	25.27	25.83	1.83	31.75	32.23	32.8	32.23	1.47	1.25	1.09	1.44	0	18.6567	-0.92	0	0	0	0
AT5G54730	AT5G54730_at	ATATG18F, ATG18F, G18F	chr5:22233789-22237341 REVERSE LENGTH=3017	homolog of yeast autophagy 18 (ATG18) F	43.22	43.16	42.73	43.04	2.31	103.97	93.85	76.79	91.76	8.61	2.13	1.77	2.53	*	27.46	58.52	46.24	43.98	9.52	95.34	90.44	77.38	88.18	6.04	2.01	1.44	3.15	*	18.6441	0.65	0	0	0	0
AT2G46220	AT2G46220_at		chr2:18979471-18980770 FORWARD LENGTH=1123	Uncharacterized conserved protein (DUF2358)	183.72	144.93	295.46	207.91	45.64	1193.67	1155.65	1286.02	1209.67	42.3	5.82	4.25	9.13	*	79.44	274.08	304.48	219.04	71.29	1125.48	1119.18	1279.52	1174.82	55.32	5.36	3.46	11.57	*	18.5882	0.47	0	0	0	0
AT4G19420	AT4G19420_at		chr4:10587166-10590588 REVERSE LENGTH=1832	Pectinacetylesterase family protein	132.42	144.19	148.3	141.47	6.98	671.94	879.64	626.76	726.39	79.39	5.13	4.15	6.19	*	120.86	145.77	168.97	144.9	14.94	588.87	578.5	559.11	575.27	12.69	3.97	3.38	4.8	*	18.5542	0.84	0	0	0	0
AT1G09390	AT1G09390_at		chr1:3031203-3033582 FORWARD LENGTH=1341	GDSL-like Lipase/Acylhydrolase superfamily protein	47.29	56.84	51.87	51.78	4.46	125.2	204.05	193.99	174.2	25.71	3.36	2.48	4.39	*	42.44	87.76	81.07	70.28	14.81	220.54	164.24	211.61	198.77	17.48	2.83	2.02	4.41	*	18.5484	0.87	0	0	0	0
AT5G49360	AT5G49360_at	BXL1, ATBXL1	chr5:20011879-20016742 REVERSE LENGTH=2708	beta-xylosidase 1	38.13	60.47	42.9	47.15	10.16	2077.02	2045.82	1964.29	2026.93	42.91	42.99	31.67	66.66	*	25.02	50.61	52.9	42.73	11.15	1475.62	1510.27	1885.7	1624.51	133.69	38.02	25.8	67.42	*	18.5349	-0.63	0	0	0	0
AT4G34020	AT4G34020_at		chr4:16298262-16300938 REVERSE LENGTH=1751	Class I glutamine amidotransferase-like superfamily protein	94.65	77.39	89.85	87.25	5.65	134.13	148.35	166.8	149.48	10.55	1.71	1.46	2.01	*	87.41	82.16	113.3	94.16	10.16	137.18	121.13	157.36	138.42	10.88	1.47	1.19	1.85	0	18.4932	0.87	0	0	0	0
AT1G70290	AT1G70290_at	ATTPS8, TPS8, ATTPSC	chr1:26471078-26474786 REVERSE LENGTH=3019	trehalose-6-phosphatase synthase S8	18.26	17.5	20.86	18.75	2.44	259.71	221.04	224.79	235.24	13.6	12.54	10.08	16.2	*	9.16	18.91	23.78	17.25	4.56	210.26	204.82	199.22	204.61	6.27	11.86	8.23	21.03	*	18.3532	-0.7	0	0	0	0
AT3G51370	AT3G51370_at		chr3:19069363-19072195 FORWARD LENGTH=1814	Protein phosphatase 2C family protein	173.71	143.5	175.47	163.76	11.05	305.47	276.13	296.97	293.24	9.58	1.79	1.59	2.04	*	104.52	153.29	156.19	137.82	17.71	211.57	220.32	225.71	219.12	6.51	1.59	1.3	2.02	*	18.239	-0.95	0	0	0	0
AT2G28130	AT2G28130_at		chr2:11988676-11991617 FORWARD LENGTH=1744	unknown protein; FUNCTIONS IN: molecular_function unknown; INVOLVED IN: biological_process unknown; LOCATED IN: cellular_component unknown; EXPRESSED IN: 25 plant structures; EXPRESSED DURING: 13 growth stages; Has 35333 Blast hits to 34131 proteins in 2444 species: Archae - 798; Bacteria - 22429; Metazoa - 974; Fungi - 991; Plants - 531; Viruses - 0; Other Eukaryotes - 9610 (source: NCBI BLink).	32.33	41.01	28.79	34.07	4.1	68.79	65.72	59.64	64.39	3.55	1.89	1.54	2.39	*	36.02	33.14	34.22	34.39	1.7	61.56	48.87	46.41	52.38	5	1.52	1.26	1.8	*	18.1818	0.83	0	0	0	0
AT3G15070	AT3G15070_at		chr3:5070134-5073317 REVERSE LENGTH=1965	RING/U-box superfamily protein	30.65	36.56	26.49	31.31	3.62	55.03	64.89	60.62	60.39	4.05	1.93	1.56	2.44	*	29.07	36.64	43.46	36.36	4.55	50.54	61.41	79.26	63.94	8.8	1.76	1.28	2.39	*	17.9487	0.87	0	0	0	0
AT3G06080	AT3G06080_at		chr3:1834707-1837984 REVERSE LENGTH=2122	Plant protein of unknown function (DUF828)	47.15	61.77	40.25	49.68	7.33	189.19	167.68	155.6	170.26	11.06	3.43	2.68	4.6	*	60.26	60.91	58.8	60.01	3.76	154.38	144.49	147.73	148.11	5.45	2.47	2.2	2.79	*	17.9104	0.95	0	0	0	0
AT2G38820	AT2G38820_at		chr2:16221836-16223662 FORWARD LENGTH=1637	Protein of unknown function (DUF506)	20.46	14.61	26.55	20.3	3.89	57.76	60.75	98.43	72.25	13.41	3.56	2.26	5.64	*	12.33	20.29	25.09	19.18	4.02	42.08	54.72	54.77	50.37	4.87	2.63	1.86	4.1	*	17.6991	-0.66	0	0	0	0
AT1G03850	AT1G03850_at		chr1:976097-977761 REVERSE LENGTH=887	Glutaredoxin family protein	13.29	18.91	16.04	16.14	2.45	18.87	55.15	57.99	43.99	12.94	2.73	1.36	4.45	*	7.46	12.61	13.82	11.12	2.4	16.78	17	20.62	17.9	1.99	1.61	1.12	2.57	0	17.6471	-0.96	0	0	0	0
AT4G39090	AT4G39090_at	RD19, RD19A	chr4:18215556-18217482 REVERSE LENGTH=1533	Papain family cysteine protease	682.72	730.56	874.79	763.83	61	1877.55	1937.42	1997.24	1934.27	49.61	2.53	2.22	2.93	*	357.66	930.05	924.13	736.54	192.9	1782.14	1950.29	2162.43	1962.19	115.99	2.66	1.83	4.71	*	17.5676	-0.7	0	0	5.861	3.191
AT2G18280	AT2G18280_at	AtTLP2, TLP2	chr2:7945998-7948468 FORWARD LENGTH=1955	tubby like protein 2	226.65	225.92	242.88	231.11	8.91	1093.06	1005.17	990.09	1031.44	34.15	4.46	4.11	4.86	*	194.41	267.36	209.23	224.55	24.67	918.82	898.78	893.2	906.65	28.54	4.04	3.39	4.96	*	17.5182	-0.86	0	0	0	0
AT4G19200	AT4G19200_at		chr4:10498876-10500722 FORWARD LENGTH=974	proline-rich family protein	487.41	611.12	626.17	574.08	46.56	1119.72	1033.39	1016.55	1058.91	34.78	1.84	1.61	2.15	*	473.98	672.31	564.52	569.81	59.85	836.49	900.43	962.15	900.74	39.47	1.58	1.33	1.93	*	17.3913	-0.81	0	0	1.829	0
AT3G19910	AT3G19910_at		chr3:6926308-6929567 FORWARD LENGTH=1455	RING/U-box superfamily protein	34.6	45.55	35.19	38.14	4.32	111.51	135.47	134.23	126.96	8.47	3.33	2.71	4.19	*	42.33	41.11	48.2	43.93	3.05	106.63	109.84	123.23	113.12	5.93	2.57	2.24	2.98	*	17.3432	0.93	0	0	0	0
AT5G66930	AT5G66930_at		chr5:26725856-26727752 FORWARD LENGTH=1091	unknown protein; CONTAINS InterPro DOMAIN/s: Protein of unknown function DUF1649 (InterPro:IPR012445); Has 236 Blast hits to 236 proteins in 105 species: Archae - 0; Bacteria - 0; Metazoa - 93; Fungi - 70; Plants - 56; Viruses - 0; Other Eukaryotes - 17 (source: NCBI BLink).	106.77	114.86	112.54	111.25	4.66	200.18	213.94	217.12	210.33	7.36	1.89	1.73	2.07	*	98	129.47	140.41	122.43	13.48	184.77	234.92	234.3	217.88	17.52	1.78	1.43	2.25	*	17.341	0.89	0	0	0	0
AT1G04400	AT1G04400_at	CRY2, FHA, AT-PHH1, PHH1, ATCRY2	chr1:1185550-1188517 REVERSE LENGTH=2444	cryptochrome 2	97.48	85.52	110.59	97.33	8.1	315.24	237.45	187.84	246.83	37.06	2.54	1.86	3.31	*	102.45	172.7	192.77	155.93	27.91	311.04	340.51	295.49	315.16	15.63	2.02	1.54	2.89	*	17.2043	1.11	0	0	0	0
AT1G21000	AT1G21000_at		chr1:7337728-7339452 FORWARD LENGTH=1296	PLATZ transcription factor family protein	216.97	248.74	196.66	220.95	16.42	310.33	381.42	354.09	348.4	23.52	1.58	1.34	1.86	*	198.74	195.87	177.75	190.82	8.41	208.97	277.36	282.25	256.11	25	1.34	1.11	1.59	0	17.1642	-1	0	0	0.502	0
AT5G16120	AT5G16120_at		chr5:5265633-5267916 FORWARD LENGTH=1438	alpha/beta-Hydrolases superfamily protein	60.98	55.32	64.99	60.26	4.52	177.06	194.41	182.61	184.67	7.22	3.06	2.68	3.54	*	32.06	62.28	69.36	54.41	11.91	149.86	165.51	196.46	170.38	14.35	3.13	2.22	4.97	*	17.1642	-0.79	0	0	0	0
AT5G24870	AT5G24870_at		chr5:8544785-8547423 REVERSE LENGTH=2204	RING/U-box superfamily protein	21.25	20.16	24.53	21.79	1.98	46.09	34.75	35.6	38.64	4.09	1.77	1.4	2.23	*	22.54	19.07	19.27	19.97	1.79	27.18	26.43	31.59	28.3	2.28	1.42	1.16	1.73	0	17.1429	-0.88	0	0	0	0
AT5G64920	AT5G64920_at	CIP8	chr5:25943888-25945442 REVERSE LENGTH=1555	COP1-interacting protein 8	154.66	134.12	146.4	146.33	6.6	364.54	436.89	531.45	444.27	48.94	3.04	2.46	3.65	*	98.89	105.49	132.22	112.32	10.83	293.77	238.31	339.27	290.22	29.38	2.58	2.05	3.26	*	16.6667	-1.1	0	0	0	0
AT2G02960	AT2G02960_at		chr2:862087-864359 REVERSE LENGTH=1560	RING/FYVE/PHD zinc finger superfamily protein	92.65	82.76	100.63	91.81	5.63	182.31	141.69	201.95	175.76	17.8	1.91	1.56	2.31	*	74.37	103.38	89.62	88.84	9.03	128.85	140.66	142.52	137.43	6.11	1.55	1.3	1.88	*	16.6667	-0.86	0	0	0	0
AT4G30270	AT4G30270_at	MERI5B, MERI-5, XTH24, SEN4	chr4:14819192-14820592 REVERSE LENGTH=1207	xyloglucan endotransglucosylase/hydrolase 24	876.63	1426.3	836.14	1044.08	196.3	2212.31	1985.45	2015.8	2068.45	80.27	1.98	1.5	2.88	*	1162.78	523.41	718.61	800.2	189.58	1311.04	1353.95	1665.63	1438.63	118.8	1.8	1.25	2.99	*	16.6667	-0.8	0	0.36	0	0
AT5G23405	AT5G23405_at		chr5:7882848-7884353 REVERSE LENGTH=809	HMG-box (high mobility group) DNA-binding family protein	39.86	36.48	39.87	38.47	2.5	65.56	76.25	79.59	73.64	5.44	1.91	1.62	2.25	*	41.91	38.24	43.69	41.1	2.26	63.06	58.66	66.41	62.83	3.18	1.53	1.35	1.73	*	16.6667	0.93	0	0	0	0
AT1G29970	AT1G29970_at		chr1:10499665-10501452 REVERSE LENGTH=1031	60S ribosomal protein L18A-1	106.72	102.03	98.93	101.96	6.41	318.76	260.78	375.21	318.28	33.12	3.12	2.53	3.78	*	60.1	76.84	80.9	72.36	8.79	174.34	191.43	194.47	186.26	8.04	2.57	2.11	3.25	*	16.6008	-1.14	0	0	0	0
AT3G15580	AT3G15580_at	ATG8I, APG8H	chr3:5273895-5275095 REVERSE LENGTH=623	Ubiquitin-like superfamily protein	331.86	338.97	329.49	332.85	8.39	707.42	802.19	781.82	762.46	32.73	2.29	2.11	2.48	*	274.22	347.63	370.03	330.02	30.4	656.16	661.52	695.53	672.9	18.32	2.04	1.76	2.42	*	16.5877	-0.87	0	0	0	0
AT3G57770	AT3G57770_at		chr3:21397542-21398853 FORWARD LENGTH=1242	Protein kinase superfamily protein	101.54	66.03	82.91	83.5	10.37	162.83	149.49	164.08	159.42	5.55	1.91	1.57	2.41	*	37.67	39.4	50.02	41.95	4.42	67.36	64.75	65.06	65.83	3	1.57	1.31	1.92	*	16.5605	-1.51	*	0	0	0
AT1G68410	AT1G68410_at		chr1:25649999-25653019 REVERSE LENGTH=2249	Protein phosphatase 2C family protein	105.28	119.36	85.04	103.07	10.69	174.89	142.74	165.05	160.95	10.22	1.56	1.29	1.93	*	137.48	97.75	104.65	112.9	12.6	147.31	140.89	154.12	146.86	6.43	1.3	1.08	1.61	0	16.2791	0.85	0	0	0	0
AT5G61500	AT5G61500_at	ATATG3, ATG3	chr5:24733785-24736853 REVERSE LENGTH=1413	autophagy 3 (APG3)	88.27	85.09	67.43	80.56	7.12	139.94	124.82	111.8	125.06	9.06	1.55	1.29	1.88	*	97.29	110.52	104.7	104.55	5.34	123.31	137.37	122.47	127.33	6.28	1.22	1.08	1.37	0	16.2791	1.1	0	0	0	0
AT1G34220	AT1G34220_at		chr1:12462849-12466000 REVERSE LENGTH=2292	Regulator of Vps4 activity in the MVB pathway protein	92.23	94.07	84.36	90.29	4.01	135.74	127.94	112.78	125.62	7.24	1.39	1.23	1.57	*	103.86	127.38	124.86	118.78	8.09	151.3	155.38	124.93	143.55	10.15	1.21	1.03	1.42	0	16.2602	1.15	0	0	0	0
AT5G53350	AT5G53350_at	CLPX	chr5:21643898-21647707 FORWARD LENGTH=2106	CLP protease regulatory subunit X	326.18	342.42	357.85	341.55	13.05	509.07	457.65	437.05	467	22.5	1.37	1.23	1.51	*	301.99	341.3	355.26	332.59	17.25	378.55	380.26	365.97	375.24	8.44	1.13	1.03	1.24	0	16.2602	-0.93	0	0	0	0
AT5G17290	AT5G17290_at	ATG5, APG5, ATATG5	chr5:5686945-5689900 REVERSE LENGTH=1308	autophagy protein Apg5 family	24.69	23.18	22.09	23.3	2.09	45.4	50.88	57.11	50.94	4.24	2.19	1.79	2.68	*	20.37	23.23	26.9	23.38	2.88	38.75	46.35	48.27	44.36	3.59	1.9	1.5	2.46	*	16.2011	0.77	0	0	0	0
AT5G37540	AT5G37540_at		chr5:14912835-14914431 FORWARD LENGTH=1597	Eukaryotic aspartyl protease family protein	42.64	57.61	37.23	45.92	6.61	80.24	107.19	110.03	98.79	10.76	2.15	1.61	2.95	*	55.09	83.82	66.25	68.48	9.02	116.87	172.84	109.21	132.46	21.03	1.93	1.35	2.71	*	16.1491	1.08	0	0	0	0
AT4G26160	AT4G26160_at	ACHT1	chr4:13255251-13256760 FORWARD LENGTH=839	atypical CYS HIS rich thioredoxin 1	58.31	45.54	43.37	49.3	5.04	86.72	89.96	121.75	99.53	11.85	2.02	1.55	2.61	*	47.35	45.88	52.37	48.36	2.58	74.21	65.76	89.28	76.13	7.3	1.57	1.3	1.87	*	16.129	-0.83	0	0	0	0
AT4G11360	AT4G11360_at	RHA1B	chr4:6906014-6906759 FORWARD LENGTH=746	RING-H2 finger A1B	61.42	32.09	75.26	55.84	13.11	115.11	97.59	143.02	118.28	13.83	2.12	1.43	3.55	*	23.12	46.14	60.53	43.16	11.17	69.71	73.99	87.36	76.42	6.32	1.77	1.2	3.12	*	16.0839	-0.71	0	0.638	0	0
AT2G48020	AT2G48020_at		chr2:19644100-19647178 FORWARD LENGTH=1765	Major facilitator superfamily protein	52.9	49.12	85.66	62.47	11.98	170.48	181.08	227.74	193.04	18.16	3.09	2.24	4.63	*	31.44	54.88	71.1	52.45	11.85	133.69	126.79	153.59	137.75	8.69	2.63	1.88	4.22	*	16.0714	-0.73	0	0	0	0
AT3G61070	AT3G61070_at	PEX11E	chr3:22604094-22606878 REVERSE LENGTH=1827	peroxin 11E	152.11	164.77	180.9	165.76	9.22	213.34	293.85	325.66	277.83	34.52	1.68	1.31	2.07	*	142.76	146.61	174.9	154.62	10.71	179.53	195.68	225.08	199.84	14.08	1.29	1.1	1.52	0	16.0305	-0.93	0	0	0	0
AT4G36870	AT4G36870_at	BLH2, SAW1	chr4:17368965-17373930 FORWARD LENGTH=2702	BEL1-like homeodomain 2	257.1	230.2	249.62	246.86	9.59	406.36	372.79	333.96	371.22	21.68	1.5	1.34	1.68	*	279.85	257.6	278.34	270.95	8.53	361.87	357.28	305.21	340.9	19.63	1.26	1.13	1.4	0	15.6716	1.01	0	0	0	0
AT5G63030	AT5G63030_at		chr5:25286223-25287694 FORWARD LENGTH=684	Thioredoxin superfamily protein	60.66	84.63	66.96	70.66	7.86	206.01	182.75	199.64	196.02	7.62	2.77	2.31	3.43	*	45.56	64.44	60.36	56.7	6.42	135.31	121.39	156.3	137.44	10.55	2.42	1.95	3.07	*	15.5844	-0.96	0	0	0	0
AT5G19430	AT5G19430_at		chr5:6553703-6555848 FORWARD LENGTH=1465	RING/U-box superfamily protein	47.15	38.4	42.41	42.81	3.48	93.8	93.1	100.39	95.28	3.15	2.23	1.94	2.59	*	38.95	53.16	50.13	47.4	4.94	84.36	95.38	105.33	95.03	6.56	2	1.64	2.49	*	15.4639	0.88	0	0	0	0
AT5G51390	AT5G51390_at		chr5:20877967-20878464 REVERSE LENGTH=498	unknown protein; Has 30201 Blast hits to 17322 proteins in 780 species: Archae - 12; Bacteria - 1396; Metazoa - 17338; Fungi - 3422; Plants - 5037; Viruses - 0; Other Eukaryotes - 2996 (source: NCBI BLink).	70.59	23.89	61.46	52	14.18	127.85	151.88	176.25	152.05	14.44	2.92	1.94	5.38	*	17.77	49.03	23.43	30.08	9.94	64.52	82.15	91.46	79.31	8.17	2.64	1.64	5.85	*	15.4639	-0.83	0	0	0	0
AT2G39000	AT2G39000_at		chr2:16286336-16287967 REVERSE LENGTH=913	Acyl-CoA N-acyltransferases (NAT) superfamily protein	101.54	99.42	130.27	110.17	10.5	400.02	327.29	320.39	349.14	25.71	3.17	2.61	3.89	*	50.79	77.87	105.68	77.95	16.19	211.12	247.14	250.32	235.69	14.06	3.02	2.21	4.64	*	15.3257	-1	0	0	0	0
AT5G59080	AT5G59080_at		chr5:23847405-23848557 REVERSE LENGTH=848	unknown protein; FUNCTIONS IN: molecular_function unknown; INVOLVED IN: response to oxidative stress; LOCATED IN: chloroplast; EXPRESSED IN: 18 plant structures; EXPRESSED DURING: 9 growth stages; BEST Arabidopsis thaliana protein match is: unknown protein (TAIR:AT3G46880.1); Has 1807 Blast hits to 1807 proteins in 277 species: Archae - 0; Bacteria - 0; Metazoa - 736; Fungi - 347; Plants - 385; V…	45.34	35.51	54.33	45.1	5.95	370.86	344.47	726.33	480.57	123.78	10.66	5.96	16.41	*	33.57	75.82	112.85	73.9	23.27	583.43	485.53	718.25	595.78	67.77	8.06	5.05	16.99	*	15.2685	0.77	0	0	0	0
AT4G22920	AT4G22920_at	ATNYE1, NYE1	chr4:12016525-12018492 REVERSE LENGTH=1581	non-yellowing 1	21.48	14.84	15.33	17.19	2.55	27.86	45.11	28.08	33.83	6.06	1.97	1.31	2.88	*	19.69	33.56	26.31	26.54	4.27	41.83	44.49	32.82	39.62	4.06	1.49	1.11	2.1	0	15.2672	1.06	0	0	0	0
AT1G68670	AT1G68670_at		chr1:25782029-25784076 FORWARD LENGTH=1583	myb-like transcription factor family protein	76.6	95.83	82.63	85.15	6.61	122.32	154.19	201.75	159.66	23.95	1.87	1.38	2.43	*	98.23	101.1	84.75	94.75	5.66	118.1	128.77	127.29	124.63	5.28	1.32	1.17	1.49	0	15.2174	0.95	0	0	0	0
AT3G60340	AT3G60340_at		chr3:22304152-22306512 FORWARD LENGTH=1383	alpha/beta-Hydrolases superfamily protein	148.98	162.92	198.89	170.18	16.05	365.68	312.34	355.39	344.05	17.14	2.02	1.71	2.43	*	117.23	142.41	175.15	144.88	17.24	251.66	240.08	284.15	257.93	14.17	1.78	1.45	2.25	*	15.2047	-0.92	0	0	0	0
AT4G16830	AT4G16830_at		chr4:9470385-9472594 FORWARD LENGTH=1590	Hyaluronan / mRNA binding family	224.82	203.16	227.21	218.87	9.17	369.03	375.52	348.2	364.35	11.02	1.66	1.53	1.81	*	184.02	260.62	225.06	222.97	23.15	331.06	371.71	334.94	346.2	14.95	1.55	1.3	1.89	*	15.0327	0.84	0	0	0	0
AT3G51880	AT3G51880_at	HMGB1	chr3:19246984-19249124 REVERSE LENGTH=822	high mobility group B1	138.92	129.61	119.4	129.25	6.69	311.78	228.64	228.17	256.1	27.81	1.98	1.6	2.39	*	151.81	151.09	159.83	153.99	4.67	226.46	241.41	215.19	227.52	9.33	1.48	1.36	1.61	*	15	1.08	0	0	0	0

## Sheet: Repressed
SUPPLEMENTARY TABLE 5B. LIST OF REPRESSED STARVATION GENES MISREGULATED IN dcl1-9 (REPRESSED SGDs).																																				FC values retrieved from Ronemus et al., 2006, Table S4
Accession	Probe set	Gene	EntrezGene	Description	WTL_1	WTL_2	WTL_3	WTL mean	WTL_mean's SE	WTD_1	WTD_2	WTD_3	WTD mean	WTD mean's SE	Fold change (WTD/WTL)	Lower bound of FC (WTD/WTL)	Upper bound of FC (WTD/WTL)	Filtered	dcl1L_1	dcl1L_2	dcl1L_3	dcl1L mean	dcl1L mean's SE	dcl1D_1	dcl1D_2	dcl1D_3	dcl1D mean	dcl1D mean's SE	Fold change (dcl1D/dcl1L)	Lower bound of FC (dcl1D/dcl1L)	Upper bound of FC (dcl1D/dcl1L)	Filtered	% Misregulation	Lower bound of FC (dcl1L/WTL)	Filtered	ago1-9 9d FC	ago1-9 21d FC	dcl1-9 21d FC
AT2G32720	AT2G32720_at	B5 #4, ATCB5-B, CB5-B	chr2:13876774-13878531 REVERSE LENGTH=728	cytochrome B5 isoform B	234.36	273.5	243.1	250.02	13.3	182.9	183.32	188.77	184.71	4.45	-1.35	-1.23	-1.49	*	196.42	222.05	159.3	192.33	19.3	307.82	199.25	304.24	270.5	35.38	1.41	1.06	1.83	0	186.179	-1.09	0	0	0	0
AT2G16660	AT2G16660_at		chr2:7218706-7221625 REVERSE LENGTH=1898	Major facilitator superfamily protein	242.19	251.51	314.01	269.13	24.43	157.17	205.52	165.18	176.15	16.9	-1.53	-1.23	-1.91	*	288.66	272.05	384.91	315.42	36.23	378.9	302.14	359.74	346.12	24.71	1.1	0.89	1.39	0	172.358	0.91	0	4.463	0	0
AT3G51160	AT3G51160_at	MUR1, MUR_1, GMD2	chr3:19007010-19008427 REVERSE LENGTH=1418	NAD(P)-binding Rossmann-fold superfamily protein	46.74	60.79	44.74	50.81	5.35	35.75	29.88	29.77	31.84	2.45	-1.6	-1.28	-1.97	*	42.05	38.96	29.82	36.97	3.8	41.15	34.31	41.72	39.17	2.63	1.06	0.87	1.31	0	167.969	-1.07	0	0	0	0
AT2G16800	AT2G16800_at		chr2:7285736-7287365 FORWARD LENGTH=1384	high-affinity nickel-transport family protein	128.93	136.2	153.54	139.34	9.12	75.77	101.05	92.01	90.23	9.28	-1.54	-1.27	-1.91	*	84.79	102.33	117.95	101.51	10.15	103.47	97	109.85	104.08	4.62	1.03	0.86	1.24	0	167.717	-1.13	0	1.539	0	0
AT5G59000	AT5G59000_at		chr5:23818184-23820237 FORWARD LENGTH=1354	RING/FYVE/PHD zinc finger superfamily protein	107.84	89.86	109.4	102.28	6.47	63.96	52.19	51.48	56.28	4.62	-1.82	-1.54	-2.17	*	38.44	35.26	36.87	36.99	1.65	37.06	34.86	45.39	38.82	3.78	1.05	0.87	1.24	0	156.494	-2.43	*	0	0	0
AT5G15050	AT5G15050_at		chr5:4871639-4873598 REVERSE LENGTH=1630	Core-2/I-branching beta-1,6-N-acetylglucosaminyltransferase family protein	112.35	106.57	98.39	106.51	5.96	48.24	42.31	51.2	47.16	3.83	-2.26	-1.93	-2.67	*	86.1	92.28	90.59	89.28	3.83	95.22	99.43	78.6	90.8	7.4	1.02	0.87	1.18	0	145.078	-1.06	0	0	0	0
AT4G14960	AT4G14960_at	TUA6	chr4:8548492-8550430 REVERSE LENGTH=1656	Tubulin/FtsZ family protein	8.41	19.93	16.48	14.98	3.87	4.62	4.71	5.61	5.09	1.1	-2.94	-1.57	-5.17	*	4.47	15.29	7.39	8.56	4.09	15.16	4.42	6.39	8.29	3.58	-1.03	-0.21	-3.95	0	86.6242	-0.78	0	0	0	0
AT1G64780	AT1G64780_at	ATAMT1;2, AMT1;2	chr1:24060770-24062630 REVERSE LENGTH=1861	ammonium transporter 1;2	110.42	118.13	90.02	106.18	8.9	17.02	14.3	21.84	17.63	3.25	-6.02	-4.44	-8.82	*	62.55	20.29	30.88	37.93	12.64	12.17	19.87	13.09	14.94	3.06	-2.54	-1.1	-4.63	0	75.2252	-1.76	*	0	0	0
AT4G18100	AT4G18100_at		chr4:10035485-10036541 REVERSE LENGTH=698	Ribosomal protein L32e	23.5	15.63	17.45	18.69	2.64	9.09	3.9	8.04	6.81	2.13	-2.74	-1.67	-5.81	*	14.15	3.86	7.29	8.4	3.3	5.53	6.41	8.05	6.73	1.16	-1.25	-0.43	-2.28	0	74.2515	-1.26	*	0	0	0
AT5G47330	AT5G47330_at		chr5:19207099-19208822 FORWARD LENGTH=1127	alpha/beta-Hydrolases superfamily protein	209.03	215.54	141.57	188.66	23.88	18.11	20.1	8.36	15.54	4.3	-12.14	-7.79	-22.85	*	138.21	53.78	77.99	89.97	24.97	18.69	19	21.03	19.61	2.25	-4.59	-2.44	-7.07	*	68.6778	-1.34	*	0	0	0
AT1G18590	AT1G18590_at	SOT17, ATSOT17, ATST5C	chr1:6398580-6399942 FORWARD LENGTH=1363	sulfotransferase 17	34.35	30.67	32.84	32.64	2.27	9.5	8.87	9.48	9.27	1.43	-3.52	-2.72	-4.8	*	23.77	15.59	14.22	18.01	3.18	13.78	16.73	12.5	13.95	2.08	-1.29	-0.86	-1.89	0	68.3824	-1.36	*	0	0	0
AT2G43100	AT2G43100_at	IPMI2, ATLEUD1	chr2:17920660-17921689 FORWARD LENGTH=1030	isopropylmalate isomerase 2	477.3	602.81	456.79	509.99	50.5	23.46	60.98	15.87	33.38	14.3	-15.28	-8.68	-52.01	*	128.98	75.95	76.55	93.87	17.49	18.19	30.37	11.21	19.86	5.91	-4.73	-2.75	-9.69	*	68.318	-3.94	*	1.908	0	0
AT4G30660	AT4G30660_at		chr4:14955373-14956118 FORWARD LENGTH=496	Low temperature and salt responsive protein family	530.27	530.56	531.64	530.94	15.01	86.49	105.09	102.79	97.4	8.19	-5.45	-4.75	-6.37	*	302.86	443.6	371.95	372.67	42.1	171.64	210.99	168.44	183.22	15.28	-2.03	-1.6	-2.55	*	66.3158	-1.19	0	0	0	0
AT3G23000	AT3G23000_at	CIPK7, SnRK3.10, PKS7, ATSRPK1, ATSR2	chr3:8172597-8174131 FORWARD LENGTH=1535	CBL-interacting protein kinase 7	173.86	175.07	199.79	182.87	9.05	47.34	47.14	27.09	40.52	7.17	-4.51	-3.45	-6.42	*	85.21	86.98	67.82	79.94	6.64	34.45	60.04	52.66	49.22	8.16	-1.62	-1.22	-2.29	*	64.6377	-1.96	*	0	0	0
AT3G11120	AT3G11120_at		chr3:3481052-3481448 FORWARD LENGTH=298	Ribosomal protein L41 family	68.95	58.38	86.62	71.59	8.69	22.59	18.59	20.61	20.85	2.34	-3.43	-2.6	-4.51	*	35.31	23.47	51.17	36.55	8.17	18.97	12.11	31.69	20.69	6.03	-1.77	-0.97	-3.62	0	62.6923	-1.33	*	0	0	0
AT4G39940	AT4G39940_at	AKN2, APK2	chr4:18519717-18521568 FORWARD LENGTH=1244	APS-kinase 2	487.76	590.86	538.01	538.22	32.34	87.13	108.36	56.95	84.2	16.94	-6.39	-4.71	-9.65	*	206.94	229.94	165.18	200.6	20.06	81.96	97.98	93.81	91.05	6.46	-2.2	-1.79	-2.68	*	61.9958	-2.23	*	0	0	0
AT4G22770	AT4G22770_at		chr4:11963628-11965684 REVERSE LENGTH=1501	AT hook motif DNA-binding family protein	474.58	507.58	355.15	445.55	47.6	214.08	144.82	166.97	175.08	20.66	-2.54	-1.96	-3.33	*	477	158.82	196.25	277.19	100.08	147.88	123.27	158.59	143.32	10.95	-1.93	-0.78	-3.15	0	60.2041	-0.97	0	0	0	0
AT4G19120	AT4G19120_at	ERD3	chr4:10460295-10463102 REVERSE LENGTH=2241	S-adenosyl-L-methionine-dependent methyltransferases superfamily protein	526.34	522.66	429.27	493.06	33.71	168.24	166.23	146.61	160.42	8.66	-3.07	-2.66	-3.54	*	464.94	337.82	282.89	362.77	54.69	261.95	244.45	193.76	233.97	21.67	-1.55	-1.13	-2.05	0	57.5188	-1.06	0	0	0	0
AT2G46650	AT2G46650_at	B5 #1, ATCB5-C, CB5-C	chr2:19151646-19152600 FORWARD LENGTH=766	cytochrome B5 isoform C	758.46	692.36	739.71	732.38	22.75	56.85	171.09	46.87	91.35	40.73	-8.02	-4.61	-30.1	*	368.49	248.93	222.35	279.82	45.14	83.57	123.17	82.57	96.36	14.27	-2.9	-1.99	-4.18	*	56.833	-2.06	*	2.321	0	0
AT3G47540	AT3G47540_at		chr3:17521029-17522269 FORWARD LENGTH=932	Chitinase family protein	46.94	53.05	45.5	48.62	2.73	18.32	20.68	14.17	17.52	2.74	-2.77	-2.16	-3.78	*	19.79	34.38	38.21	30.77	5.82	23.42	23.77	16.87	21.36	2.64	-1.44	-0.95	-2.05	0	56.0185	-1.18	0	0	0	0
AT3G24830	AT3G24830_at		chr3:9064532-9066089 FORWARD LENGTH=920	Ribosomal protein L13 family protein	111.23	114.39	110.17	111.85	4.73	40.72	50.46	51.47	47.24	5.03	-2.37	-1.98	-2.9	*	81.29	79.16	77.48	79.75	3.51	57.97	79.82	65.93	67.39	7.48	-1.18	-0.98	-1.46	0	50.5051	-1.27	*	0	0	0
AT3G15720	AT3G15720_at		chr3:5325290-5327537 REVERSE LENGTH=1490	Pectin lyase-like superfamily protein	87.47	39.84	82.33	69.88	15.01	24.58	20.37	14.07	19.69	3.57	-3.55	-2.14	-5.65	*	31.29	33.44	56.05	40.25	8.04	28.74	25.46	19.54	24.56	2.97	-1.64	-1.06	-2.35	0	50.4673	-1.03	0	0	0	0
AT3G03780	AT3G03780_at	ATMS2, MS2	chr3:957085-960980 FORWARD LENGTH=2613	methionine synthase 2	1181.43	1430.12	831.29	1147.28	177.46	136.69	168.54	109.81	138.53	18.87	-8.28	-5.81	-11.63	*	1010.94	665.98	655.45	775.54	117.28	221.28	188.73	176.59	194.97	15.14	-3.98	-2.92	-5.17	*	49.7418	-1.02	0	0	0	0
AT5G19380	AT5G19380_at	CLT1	chr5:6526807-6530592 REVERSE LENGTH=1881	CRT (chloroquine-resistance transporter)-like transporter 1	80.66	72.39	72.95	75.37	3.69	34.55	44.36	38.43	39.16	4.05	-1.92	-1.61	-2.35	*	74.18	44.76	38.66	52.46	11.01	44.98	43.01	32.44	40.15	4.4	-1.31	-0.83	-1.87	0	48.4472	-1.05	0	0	0	0
AT5G56030	AT5G56030_at	HSP81-2, ERD8, HSP90.2, AtHsp90.2	chr5:22686802-22689650 FORWARD LENGTH=2438	heat shock protein 81-2	96.65	91.85	101.58	96.22	4.42	32.12	18.64	33.57	27.96	5.37	-3.44	-2.58	-5.06	*	52.73	45.09	42.68	47.54	4.14	25.11	31.7	25.21	27.68	3.21	-1.72	-1.36	-2.21	*	47.2868	-1.73	*	0	0	0
AT2G36970	AT2G36970_at		chr2:15529006-15530749 FORWARD LENGTH=1554	UDP-Glycosyltransferase superfamily protein	134.97	212.04	150.19	165.62	24.42	62.07	52.57	28.85	47.4	10.39	-3.49	-2.31	-5.73	*	116.83	92.24	83.44	97.33	10.47	42.02	76.75	49.39	55.97	11.11	-1.74	-1.23	-2.66	*	46.7532	-1.23	*	0	0	0
AT2G38010	AT2G38010_at		chr2:15906862-15909931 FORWARD LENGTH=2338	Neutral/alkaline non-lysosomal ceramidase	281.85	221.57	255.07	253.17	17.43	47.8	61.41	53.43	53.97	5	-4.69	-3.89	-5.71	*	213.96	256.77	193.14	221.61	19.48	89.62	95.34	69.31	84.61	8.54	-2.62	-2.1	-3.28	*	46.0154	-0.95	0	0	0	0
AT1G06380	AT1G06380_at		chr1:1945124-1946076 FORWARD LENGTH=953	Ribosomal protein L1p/L10e family	41.79	37.15	38.83	39.22	1.93	20.71	23.32	21.66	21.8	1.82	-1.8	-1.54	-2.13	*	40.54	26.12	36.57	34.28	4.45	30.93	35.27	26.09	30.77	3.18	-1.11	-0.84	-1.46	0	45.4545	-0.93	0	0	0	0
AT2G20610	AT2G20610_at	SUR1, HLS3, RTY, ALF1, RTY1	chr2:8877960-8880388 REVERSE LENGTH=1669	Tyrosine transaminase family protein	482.58	677.04	489.7	549.88	67.73	152.68	230.91	131.37	171.45	31.87	-3.21	-2.26	-4.82	*	390.62	340.09	281.6	336.61	32.7	227.18	230.77	214.33	224.2	7.92	-1.5	-1.25	-1.76	*	44.6903	-1.25	*	0	0	0
AT5G47700	AT5G47700_at		chr5:19327803-19328983 REVERSE LENGTH=675	60S acidic ribosomal protein family	40.45	43.22	34.98	39.6	3.6	11.66	17.97	27.13	18.94	4.98	-2.09	-1.41	-3.73	*	20.64	22.52	32.03	25.06	3.85	19.27	21.03	27.79	22.52	3.2	-1.11	-0.78	-1.58	0	44.6809	-1.2	0	0	0	0
AT1G53300	AT1G53300_at	TTL1	chr1:19879422-19882375 FORWARD LENGTH=2404	tetratricopetide-repeat thioredoxin-like 1	292.88	345.63	271.5	302.98	23.55	129.28	150.5	149.14	142.81	8.09	-2.12	-1.8	-2.48	*	332.08	237.66	202.56	257.69	38.75	212.6	191.88	159.66	188.3	15.91	-1.37	-1	-1.79	0	44.4444	-0.91	0	0	0	0
AT1G19920	AT1G19920_at	APS2, ASA1	chr1:6914613-6916805 REVERSE LENGTH=1801	Pseudouridine synthase/archaeosine transglycosylase-like family protein	164.86	130.2	151.27	149.05	10.31	73.85	68.32	60.61	67.42	5.61	-2.21	-1.85	-2.65	*	79.77	97.5	127.14	101.34	14.26	75.03	74.05	72.13	73.9	3.03	-1.37	-1.05	-1.71	0	43.2432	-1.16	0	0	0	0
AT3G28940	AT3G28940_at		chr3:10968100-10969387 REVERSE LENGTH=810	AIG2-like (avirulence induced gene) family protein	245.07	249.3	255.26	250.21	9.3	112.12	112.02	106.74	110.25	5.63	-2.27	-2.05	-2.52	*	166.5	247.18	197.23	203.36	25.39	104.37	154.11	130.38	129.31	15.96	-1.57	-1.17	-2.11	0	42.9268	-1.01	0	0	0	0
AT1G53645	AT1G53645_at		chr1:20026147-20028635 REVERSE LENGTH=1907	hydroxyproline-rich glycoprotein family protein	125.36	125.73	100.69	117.28	8.76	51.3	42.85	40.66	44.63	3.87	-2.63	-2.18	-3.19	*	134.2	100.77	118.72	117.94	9.72	92.23	70.45	62.19	74.78	9.15	-1.58	-1.25	-2.04	*	42.6606	0.84	0	0	0	0
AT5G63980	AT5G63980_at	SAL1, ALX8, ATSAL1, HOS2, FRY1, RON1	chr5:25609812-25611933 FORWARD LENGTH=1383	Inositol monophosphatase family protein	132.38	123.69	104.61	120.28	8.89	36.97	48.41	30.34	38.71	5.91	-3.11	-2.4	-4.24	*	71.73	78.59	87.61	79.18	5.49	47.51	47.71	53.33	49.44	2.76	-1.6	-1.38	-1.85	*	42.5	-1.28	*	0	0	0
AT3G62870	AT3G62870_at		chr3:23242665-23244353 REVERSE LENGTH=1048	Ribosomal protein L7Ae/L30e/S12e/Gadd45 family protein	421.62	394.49	401.31	404.38	12.28	194.53	200.55	190.09	194.78	7.35	-2.08	-1.92	-2.25	*	404.13	332.28	269.37	335.27	39.35	257.45	216.03	246.25	240	12.79	-1.4	-1.11	-1.71	0	42.1875	-1	0	0	0	0
AT5G47220	AT5G47220_at	ATERF2, ATERF-2, ERF2	chr5:19171862-19172823 REVERSE LENGTH=962	ethylene responsive element binding factor 2	208.93	355.46	234.8	266.48	45.89	76.89	163.95	56.01	98.95	33.4	-2.69	-1.55	-6.24	*	204.07	415.93	318.18	312.7	61.98	179.77	291.25	191.37	220.43	36.46	-1.42	-0.9	-2.17	0	41.9355	0.74	0	0	3.147	0
AT1G14360	AT1G14360_at	ATUTR3, UTR3	chr1:4911093-4913152 REVERSE LENGTH=1388	UDP-galactose transporter 3	387.03	386.83	372.41	382.2	10.8	122.05	130.22	112.46	121.75	7.08	-3.14	-2.83	-3.51	*	259.4	362.77	286.79	302.32	32.59	132.02	170.78	122.85	141.81	15.56	-2.13	-1.65	-2.76	*	41.6961	-1.07	0	0	0	0
AT2G37250	AT2G37250_at	ADK, ATPADK1	chr2:15641906-15643786 FORWARD LENGTH=1408	adenosine kinase	361.51	417.22	377.19	384.78	19.19	177.62	198.2	153.24	176.16	14.42	-2.18	-1.87	-2.57	*	336.14	210.5	180.06	242.33	47.78	153.69	143.25	148.3	148.37	4.87	-1.63	-1.1	-2.18	0	41.1765	-1.18	0	0	0	0
AT3G15460	AT3G15460_at		chr3:5214084-5216261 REVERSE LENGTH=1216	Ribosomal RNA processing Brix domain protein	109.64	113.96	84.27	102.2	10.03	28.14	26.94	22.22	25.48	2.95	-4.01	-3.13	-5.19	*	96.47	65.22	64.7	75.54	10.57	34.03	31.7	19.13	28.07	5.06	-2.69	-1.86	-4.04	*	40.5751	-1.03	0	0	0	0
AT1G24100	AT1G24100_at	UGT74B1	chr1:8525435-8527087 REVERSE LENGTH=1572	UDP-glucosyl transferase 74B1	130.42	105.29	90.65	108.77	11.72	47.28	59.08	26.49	44.23	9.74	-2.46	-1.7	-3.96	*	84.94	84.73	78.61	82.92	2.89	81.24	67.63	52.8	67.14	8.37	-1.23	-1.02	-1.56	0	40	-1.07	0	0	0	0
AT5G15490	AT5G15490_at		chr5:5027639-5030194 REVERSE LENGTH=1781	UDP-glucose 6-dehydrogenase family protein	60.88	71.53	52.11	61.43	6.02	27.74	28.59	27	27.89	1.71	-2.2	-1.8	-2.65	*	83.52	51.05	54.06	62.82	10.38	31.2	37.83	50.29	39.79	5.9	-1.58	-1.08	-2.28	0	40	0.72	0	0	0	0
AT1G09210	AT1G09210_at	CRT1b, AtCRT1b	chr1:2972842-2976750 REVERSE LENGTH=1745	calreticulin 1b	394.52	592.6	361.61	448.26	75.02	110.25	140.41	109.57	119.67	11.53	-3.75	-2.63	-5.05	*	370.95	447.16	335.29	384.85	34.77	193.67	217.87	195.76	202.99	12.03	-1.9	-1.58	-2.25	*	39.924	-0.82	0	0	0	0
AT5G47630	AT5G47630_at	mtACP3	chr5:19306144-19307094 FORWARD LENGTH=858	mitochondrial acyl carrier protein 3	185.48	146.32	181.43	171.05	12.41	84.35	80.57	73	79.29	3.74	-2.16	-1.86	-2.48	*	128.19	116.47	72.81	105.55	17.1	88.07	49.53	41.9	59.83	14.25	-1.76	-1.12	-3.05	0	39.7849	-1.24	*	0	0	0
AT5G19250	AT5G19250_at		chr5:6471906-6472945 FORWARD LENGTH=805	Glycoprotein membrane precursor GPI-anchored	639.82	552.23	540.74	579.86	34.95	68.62	170.7	116.59	117.42	31.5	-4.94	-3.37	-8.89	*	451.14	732.18	512.12	565.53	87.64	177.11	237.55	182.48	197.74	23.98	-2.86	-2.03	-3.93	*	39.7626	-0.8	0	0	0	0
AT4G30330	AT4G30330_at		chr4:14836548-14838020 REVERSE LENGTH=593	Small nuclear ribonucleoprotein family protein	87.65	73.86	89.18	84.29	5.99	27.69	44.46	44.68	39.17	6.43	-2.15	-1.64	-3	*	57.76	47.36	73.69	59.46	8.25	41.68	34.45	54.26	42.58	6.83	-1.4	-0.99	-2.02	0	39.6341	-1.11	0	0	0	0
AT3G53260	AT3G53260_at	PAL2, ATPAL2	chr3:19744051-19746780 REVERSE LENGTH=2520	phenylalanine ammonia-lyase 2	195.01	274.73	129.15	199.39	42.79	55.63	43.15	48.1	48.63	4.23	-4.1	-2.61	-5.77	*	283.03	127.27	128.16	179.46	51.59	63.29	55.47	61.23	59.79	3.27	-3	-1.58	-4.48	*	39.4636	-0.62	0	0	0	0
AT2G36880	AT2G36880_at	MAT3	chr2:15479366-15481412 REVERSE LENGTH=1687	methionine adenosyltransferase 3	480.72	486.98	543.66	504.48	21.3	174.59	197.43	185.67	186.06	9.12	-2.71	-2.44	-3.02	*	511.2	381.1	411.34	434.54	39.37	241.53	246.41	258.03	247.51	7.28	-1.76	-1.48	-2.04	*	39.3443	-0.99	0	0	0	0
AT3G22230	AT3G22230_at		chr3:7843967-7844597 REVERSE LENGTH=631	Ribosomal L27e protein family	79.22	75.89	75.83	77.2	3.05	25.86	44.61	35.55	35.45	6.18	-2.18	-1.68	-3.07	*	49.89	35.37	41.23	42.24	4.36	25.45	36.38	33.07	31.55	3.8	-1.34	-1.03	-1.75	0	38.6905	-1.54	*	0	0	0
AT2G28550	AT2G28550_at	RAP2.7	chr2:12225842-12228543 REVERSE LENGTH=2013	related to AP2.7	440.77	575.14	412.62	476.37	52.17	108.73	145.74	93.49	116.21	16.57	-4.1	-3.07	-5.61	*	423.96	336.09	273.05	344.11	43.97	131.9	162.09	120.99	138.51	13.13	-2.48	-1.89	-3.21	*	38.4365	-1.05	0	0.524	0	0
AT3G11250	AT3G11250_at		chr3:3521357-3523001 FORWARD LENGTH=1243	Ribosomal protein L10 family protein	88.55	71.4	80.96	81.08	5.79	18.85	32.26	28.42	26.24	5.51	-3.09	-2.24	-4.78	*	68.67	46.19	56.01	56.96	6.9	33.95	17.84	34.52	29.07	5.53	-1.96	-1.38	-2.97	*	38.3929	-1.14	0	0	0	0
AT3G15030	AT3G15030_at	TCP4, MEE35	chr3:5061681-5064115 FORWARD LENGTH=2209	TCP family transcription factor 4	144.88	145.55	151.79	147.83	4.14	58.48	56.71	74.16	63.01	5.9	-2.35	-2.02	-2.79	*	152.04	130.87	118.18	133.82	10.46	93.35	86.95	92.74	91.66	4.01	-1.46	-1.25	-1.68	*	38.1188	-0.97	0	0	0	0
AT1G79410	AT1G79410_at	AtOCT5, 5-Oct	chr1:29867880-29869633 REVERSE LENGTH=1754	organic cation/carnitine transporter5	46.04	38.66	42.33	42.38	2.6	19.65	20.11	21.66	20.37	1.99	-2.08	-1.73	-2.54	*	23.44	23.66	14.52	20.44	3.22	12.69	15.6	9.22	12.78	2.23	-1.6	-1.08	-2.4	0	37.5723	-1.61	*	0	0	0
AT5G50460	AT5G50460_at		chr5:20551437-20552566 REVERSE LENGTH=500	secE/sec61-gamma protein transport protein	723.92	990.88	746.85	814.42	94	239.32	275.08	256.64	255.64	15.15	-3.19	-2.53	-3.9	*	466.82	570.28	417.92	485.16	46.85	246.73	258.28	260.86	255.8	8.92	-1.9	-1.58	-2.22	*	37.5494	-1.3	*	0	0	0
AT1G15250	AT1G15250_at		chr1:5248664-5249474 REVERSE LENGTH=542	Zinc-binding ribosomal protein family protein	200.14	237.47	191.59	209.53	15.14	97.08	100.72	78.25	92.25	7.68	-2.27	-1.9	-2.73	*	145.79	117.75	128.81	130.49	8.39	102.26	93.29	64.45	86.9	11.66	-1.5	-1.19	-1.96	0	37.3684	-1.37	*	0	0	0
AT4G30650	AT4G30650_at		chr4:14954320-14954968 FORWARD LENGTH=575	Low temperature and salt responsive protein family	483.01	515.89	494.54	497.97	14.64	61.04	58.9	82.76	67.28	8.79	-7.4	-6.05	-9.47	*	503.9	515.08	520.73	512.98	9.27	105.53	93.9	138.08	112.25	13.77	-4.57	-3.79	-5.74	*	37.3554	0.97	0	0	0	0
AT3G28900	AT3G28900_at		chr3:10902647-10904458 REVERSE LENGTH=623	Ribosomal protein L34e superfamily protein	148.52	163.4	136.66	149.23	9.33	54.12	56.52	53.69	54.69	3.88	-2.73	-2.34	-3.2	*	121.22	101.72	109.87	110.96	6.31	63.24	52.24	72.78	62.72	6.44	-1.77	-1.47	-2.17	*	37.1795	-1.17	0	0	0	0
AT1G68795	AT1G68795_at	CLE12	chr1:25840855-25841652 REVERSE LENGTH=798	CLAVATA3/ESR-RELATED 12	52.98	42.41	36.69	44.06	4.85	22.76	18.05	21.21	20.57	2.02	-2.14	-1.67	-2.73	*	44.79	23.42	15.88	28.03	8.64	16.54	10.74	11.03	12.74	2.02	-2.2	-1.05	-3.67	0	37.1257	-0.99	0	0	0	0
AT2G22500	AT2G22500_at	UCP5, ATPUMP5, DIC1	chr2:9563224-9564751 REVERSE LENGTH=1528	uncoupling protein 5	109.96	137.97	117.63	120.43	10.39	45.53	30.38	59.61	44.95	9.04	-2.68	-1.93	-4.08	*	115.64	249.59	123.87	163.08	43.96	55.46	86.64	74.42	71.89	9.92	-2.27	-1.22	-3.56	*	36.7876	0.74	0	0	0	0
AT4G30840	AT4G30840_at		chr4:15017615-15019735 REVERSE LENGTH=1328	Transducin/WD40 repeat-like superfamily protein	49.06	47.54	37.94	44.84	4.08	19.38	19.74	19.3	19.5	1.83	-2.3	-1.85	-2.86	*	42.73	40.43	38.8	40.71	1.92	34.04	25.92	28.18	29.52	2.82	-1.38	-1.17	-1.66	0	36.7568	-0.92	0	0	0	0
AT2G32060	AT2G32060_at		chr2:13639016-13640316 REVERSE LENGTH=761	Ribosomal protein L7Ae/L30e/S12e/Gadd45 family protein	120.27	124.35	129.48	124.87	3.89	43.02	55.54	54.5	50.95	4.91	-2.45	-2.1	-2.93	*	79.93	74.3	73.67	76.32	3.11	39.96	31.2	58.5	43.38	8.09	-1.76	-1.33	-2.55	*	36.6667	-1.51	*	1.903	0	0
AT4G39120	AT4G39120_at	IMPL2, HISN7	chr4:18220589-18227988 REVERSE LENGTH=1664	myo-inositol monophosphatase like 2	371.35	339.21	302.3	337.31	20.89	138.2	148.49	142.16	143.19	5.83	-2.36	-2.08	-2.65	*	308.29	252.48	257.6	272.38	18.33	200.37	166.84	147.46	171.62	15.7	-1.59	-1.32	-1.93	*	36.5385	-1.07	0	0	0	0
AT2G35790	AT2G35790_at		chr2:15040679-15042123 FORWARD LENGTH=920	unknown protein; CONTAINS InterPro DOMAIN/s: Protein of unknown function DUF1301 (InterPro:IPR009724); Has 116 Blast hits to 116 proteins in 49 species: Archae - 0; Bacteria - 0; Metazoa - 53; Fungi - 6; Plants - 49; Viruses - 0; Other Eukaryotes - 8 (source: NCBI BLink).	292.64	252.51	277.93	274.23	11.81	117.05	110.42	126.06	117.75	4.96	-2.33	-2.11	-2.57	*	269.81	187.81	239.47	232.33	23.83	143.04	114.75	156.47	137.87	12.46	-1.69	-1.34	-2.11	*	36.4929	-0.99	0	2.378	0	0
AT3G21580	AT3G21580_at		chr3:7601969-7603885 REVERSE LENGTH=1381	cobalt ion transmembrane transporters	167.83	161.58	172.66	167.59	5.87	79.28	74.32	59.71	70.86	6.74	-2.37	-2.02	-2.83	*	117.46	135.38	130.22	127.79	6.37	97.26	76.26	82.45	85.45	6.73	-1.5	-1.29	-1.75	*	36.1386	-1.19	0	0	0	0
AT3G02080	AT3G02080_at		chr3:363881-365275 REVERSE LENGTH=803	Ribosomal protein S19e family protein	433.14	447.3	422.38	433.23	12.56	281.79	274.43	314.39	290.34	15	-1.49	-1.36	-1.65	*	356.1	264.09	366.07	327.96	33.3	330.05	237.26	318.22	295.23	29.18	-1.11	-0.88	-1.41	0	35.2941	-1.12	0	0	0	0
AT3G46110	AT3G46110_at		chr3:16932112-16933642 FORWARD LENGTH=1351	Domain of unknown function (DUF966)	22.19	22.36	19.09	21.25	1.65	12.16	12.47	12.35	12.32	1.13	-1.73	-1.42	-2.11	*	19.43	21.61	19.28	20.17	1.36	21.94	14.38	15.16	17.14	2.52	-1.18	-0.92	-1.58	0	35.2113	-0.89	0	0	0	0
AT2G37270	AT2G37270_at	ATRPS5B, RPS5B	chr2:15647677-15649218 REVERSE LENGTH=1006	ribosomal protein 5B	315.86	268.59	336.24	307.83	20.45	120.63	143.69	138.53	134.15	9.36	-2.29	-1.96	-2.69	*	210.32	176.13	192.68	192.94	10.31	138.09	107.6	141.4	128.46	11.4	-1.5	-1.27	-1.8	*	35.2041	-1.38	*	2.096	0	0
AT3G61110	AT3G61110_at	ARS27A, RS27A	chr3:22611634-22612904 FORWARD LENGTH=609	ribosomal protein S27	90.86	78.64	96.66	88.72	5.85	38.9	42.73	60.31	46.91	7.6	-1.89	-1.45	-2.62	*	48.62	40.04	45.27	44.61	3.35	34.19	26.84	46.55	35.68	6.29	-1.25	-0.94	-1.79	0	35.1724	-1.69	*	2.532	0	0
AT4G21910	AT4G21910_at		chr4:11625362-11629337 REVERSE LENGTH=1994	MATE efflux family protein	48.16	57.95	49.24	51.49	3.93	5.94	8.98	5.12	6.38	1.9	-8.06	-5.29	-15.89	*	65.69	57.44	44.39	55.44	6.79	14.49	10.29	9.34	11.3	2.2	-4.91	-3.43	-7.51	*	35.1607	0.84	0	0	0	2.422
AT1G27330	AT1G27330_at		chr1:9492964-9494069 FORWARD LENGTH=478	Ribosome associated membrane protein RAMP4	337.51	365.99	352.22	350.86	12.9	107.67	103.61	106.35	105.82	4.87	-3.32	-3.01	-3.66	*	263.34	292	261.36	270.85	13.29	102.44	100.4	138.38	113.51	13.34	-2.39	-1.96	-3	*	34.8837	-1.17	0	0	0	0
AT3G14000	AT3G14000_at	ATBRXL2, BRX-LIKE2	chr3:4630869-4633411 REVERSE LENGTH=1484	DZC (Disease resistance/zinc finger/chromosome condensation-like region) domain containing protein	58.51	39.65	33.02	43.69	7.88	18.27	23.74	11.51	17.75	4.07	-2.46	-1.53	-4.21	*	61.89	46.05	51.16	52.97	4.91	52.09	33.55	34.63	39.97	6.08	-1.33	-1	-1.82	0	34.6405	0.89	0	0	0	0
AT1G65040	AT1G65040_at		chr1:24159834-24162038 REVERSE LENGTH=1163	RING/U-box superfamily protein	88.34	95.99	91.82	91.72	3.67	47.54	46.79	42.48	45.69	2.62	-2.01	-1.79	-2.26	*	75.92	113.42	75.83	88.27	13.05	52	61.95	53.79	55.95	3.59	-1.58	-1.17	-2.02	0	34.6369	-0.83	0	0	0	0
AT1G23290	AT1G23290_at	RPL27A, RPL27AB	chr1:8262984-8263587 FORWARD LENGTH=604	Ribosomal protein L18e/L15 superfamily protein	148.05	124.95	173.04	148.91	14.25	52.82	71.48	85.32	69.72	10.1	-2.14	-1.62	-2.91	*	91.64	81.33	95.93	89.25	5.15	59.21	46.82	84.36	63.22	11.63	-1.41	-1.06	-2.04	0	34.5679	-1.38	*	0	0	0
AT3G61820	AT3G61820_at		chr3:22879804-22881630 REVERSE LENGTH=1827	Eukaryotic aspartyl protease family protein	30.6	12.9	20.08	21.22	5.21	4.25	4.87	5.52	4.88	0.94	-4.35	-2.43	-7.24	*	16.42	9.46	15.05	13.42	2.42	6.05	5.72	4.77	5.46	0.98	-2.46	-1.59	-3.79	*	34.5679	-0.89	0	0	0	0
AT5G64650	AT5G64650_at		chr5:25839360-25840809 REVERSE LENGTH=699	Ribosomal protein L17 family protein	279.16	228.34	252.84	253.8	15.34	147.4	190.57	172.63	169.8	14.33	-1.49	-1.26	-1.78	*	237	149.72	242.58	209.32	30.54	200.12	141.86	205.7	182.82	20.25	-1.14	-0.83	-1.54	0	34.127	-0.95	0	0	0	0
AT5G67360	AT5G67360_at	ARA12	chr5:26871891-26874579 REVERSE LENGTH=2689	Subtilase family protein	78.68	73.11	79.63	77.12	3.86	58.59	39.65	48.94	49.21	5.83	-1.57	-1.29	-1.97	*	101.9	66.66	65.64	77.83	12.03	46.64	75.12	68.92	63.45	9.16	-1.23	-0.85	-1.75	0	34.1085	0.75	0	0	0	0
AT1G56650	AT1G56650_at	PAP1, MYB75, SIAA1, ATMYB75	chr1:21233595-21235137 REVERSE LENGTH=914	production of anthocyanin pigment 1	575.04	1250.56	387.18	737.82	262.53	4.92	17.57	24.26	15.46	6.97	-47.72	-17.06	-195.24	*	999.33	348.73	263.73	537.35	231.67	15.01	12.39	13.6	13.66	2.33	-39.33	-11.26	-74.12	*	33.9977	-0.5	0	0	0	0
AT3G17890	AT3G17890_at		chr3:6127041-6127874 FORWARD LENGTH=675	unknown protein; Has 31 Blast hits to 31 proteins in 12 species: Archae - 0; Bacteria - 4; Metazoa - 5; Fungi - 10; Plants - 12; Viruses - 0; Other Eukaryotes - 0 (source: NCBI BLink).	43.13	34.65	45.28	40.46	3.94	21.43	26.7	20.97	22.93	2.44	-1.76	-1.39	-2.25	*	27.56	36.44	37.29	34.04	3.95	19.27	36.41	15.37	23.77	6.78	-1.43	-0.92	-2.75	0	33.8129	-0.93	0	0	0	0
AT5G65990	AT5G65990_at		chr5:26394882-26396513 FORWARD LENGTH=1549	Transmembrane amino acid transporter family protein	195.65	185.49	148.38	176.71	15.11	54.21	72.72	65.57	64.24	6.84	-2.75	-2.2	-3.47	*	158.91	165.69	215.31	180.03	18.5	104.5	101.82	98.7	101.44	4.28	-1.77	-1.46	-2.11	*	33.6364	0.81	0	0	0	0
AT2G17630	AT2G17630_at		chr2:7666585-7668065 FORWARD LENGTH=1481	Pyridoxal phosphate (PLP)-dependent transferases superfamily protein	38.77	39.8	31.46	36.79	3.1	10.67	11.92	9.96	10.91	1.85	-3.37	-2.53	-4.78	*	39.99	27.95	26.87	31.61	4.27	16.37	12.6	9.36	13.04	2.39	-2.42	-1.68	-3.65	*	33.5968	-0.91	0	0	0	0
AT5G04590	AT5G04590_at	SIR	chr5:1319356-1322526 FORWARD LENGTH=2205	sulfite reductase	431.2	471.24	411.91	437.28	20.6	254.86	323.93	211.31	262.93	34	-1.66	-1.35	-2.14	*	490.31	363.18	381.91	411.55	40.03	345.34	427.33	328.21	366.06	32.93	-1.12	-0.9	-1.4	0	33.3333	-0.9	0	1.816	0	0
AT1G14410	AT1G14410_at	ATWHY1, PTAC1, WHY1	chr1:4929123-4930904 REVERSE LENGTH=1115	ssDNA-binding transcriptional regulator	100.72	99.12	88.51	96.25	5.16	43.31	40.97	44.08	42.61	3.07	-2.26	-1.95	-2.63	*	83.06	97.6	76.02	85.6	7.53	55.42	49.3	58.66	54.85	3.4	-1.56	-1.3	-1.86	*	33.3333	-0.95	0	0	0	0
AT5G03160	AT5G03160_at	ATP58IPK, P58IPK	chr5:750109-752805 FORWARD LENGTH=1760	homolog of mamallian P58IPK	115.05	144.1	109.39	122.81	11.35	50.98	40.9	40.12	43.97	4.04	-2.79	-2.25	-3.47	*	97.03	107.41	87.73	97.37	6.57	63.44	50.78	46.79	53.57	5.35	-1.82	-1.5	-2.24	*	33.3333	-1.04	0	0	0	0
AT1G35560	AT1G35560_at		chr1:13115826-13117235 REVERSE LENGTH=1410	TCP family transcription factor	46.58	30.57	55.38	44.27	7.35	11.54	15.09	8.93	11.77	2.75	-3.76	-2.38	-6.44	*	25.88	23.76	22.9	24.2	1.88	9.64	13.58	11.39	11.2	2.14	-2.16	-1.59	-3.2	*	33.1933	-1.3	*	0	0	0
AT3G46560	AT3G46560_at	TIM9, emb2474	chr3:17138587-17139512 FORWARD LENGTH=538	Tim10/DDP family zinc finger protein	165.24	186.79	193.98	181.38	10.36	91.08	80.5	75.34	82.18	5.43	-2.21	-1.91	-2.55	*	142.26	93.54	109.09	114.99	14.42	74.46	59.33	74.29	69.02	5.47	-1.67	-1.28	-2.11	*	32.9843	-1.28	*	0	0	0
AT4G34200	AT4G34200_at	EDA9	chr4:16373819-16376622 REVERSE LENGTH=2095	D-3-phosphoglycerate dehydrogenase	279.6	386.79	287.02	317.53	36.38	90.86	99.96	63.61	84.92	11.7	-3.74	-2.79	-5.09	*	517.98	357.84	351.44	408.85	54.3	176.84	176.14	146.38	167.56	11.41	-2.44	-1.87	-3.07	*	32.9749	0.95	0	1.709	3.723	0
AT1G57660	AT1G57660_at		chr1:21355520-21356537 FORWARD LENGTH=715	Translation protein SH3-like family protein	62.12	61.41	56.85	59.89	2.8	35.93	26.32	29.87	31.12	3.33	-1.92	-1.61	-2.37	*	40.36	40.15	36.55	38.84	3.09	26.89	31.44	29.8	29.44	2.7	-1.32	-1.08	-1.62	0	32.9193	-1.33	*	0	0	0
AT3G52960	AT3G52960_at		chr3:19639668-19640619 FORWARD LENGTH=952	Thioredoxin superfamily protein	63.64	52.48	55.59	57.34	3.77	13.32	25.87	32.97	23.93	6.19	-2.4	-1.65	-4.2	*	49.52	45.84	71.2	55.29	8.15	28.61	19.41	47.08	31.52	8.34	-1.75	-1.11	-3.22	0	32.7273	-0.81	0	0	0	0
AT5G23070	AT5G23070_at		chr5:7741898-7742978 FORWARD LENGTH=1081	Thymidine kinase	201.74	147.3	186.25	178.34	16.26	100.13	87.98	71.26	86.56	8.71	-2.06	-1.65	-2.59	*	135.38	148.02	93.85	126.29	16.86	101.45	77.5	77.04	85.45	8.42	-1.48	-1.11	-1.93	0	32.7273	-1.09	0	0	0	0
AT5G23900	AT5G23900_at		chr5:8063985-8065523 REVERSE LENGTH=856	Ribosomal protein L13e family protein	341.27	325.54	391.61	351.94	21.25	205.78	180.83	230.73	205.6	15.02	-1.71	-1.47	-2.01	*	277.19	183.99	240.15	233.78	27.04	185.74	149.44	211.11	181.5	18.61	-1.29	-0.99	-1.66	0	32.6531	-1.23	*	0	0	0
AT1G07840	AT1G07840_at		chr1:2424054-2426676 FORWARD LENGTH=1322	Sas10/Utp3/C1D family	141.12	135.64	107.87	128.54	10.81	76.76	79.28	74.48	76.98	3.66	-1.67	-1.41	-1.95	*	145.64	111.32	98.72	118.63	14.3	108.37	100.08	85.33	97.59	7.46	-1.22	-0.95	-1.52	0	32.6241	-0.86	0	0	0	0
AT1G04980	AT1G04980_at	ATPDIL2-2, ATPDI10, PDI10, PDIL2-2	chr1:1413644-1416144 REVERSE LENGTH=1593	PDI-like 2-2	83.55	104.53	79.27	89	8.71	19.82	25.02	13.2	19.46	4	-4.57	-3.25	-7.08	*	49.63	87.91	56.55	64.72	12.26	21.13	20.39	17.97	19.79	2.02	-3.27	-2.19	-4.54	*	32.6154	-0.99	0	0	0	0
AT5G03630	AT5G03630_at	ATMDAR2	chr5:922166-924683 REVERSE LENGTH=1587	Pyridine nucleotide-disulphide oxidoreductase family protein	267.29	284.95	262.76	271.88	9.24	80.97	74.36	64.15	73.3	5.61	-3.71	-3.25	-4.29	*	304.83	356.37	268.83	310.06	26.44	98.9	137.57	95.65	110.91	14.27	-2.8	-2.19	-3.66	*	32.6154	0.97	0	0	0	0
AT4G34360	AT4G34360_at		chr4:16431941-16433958 FORWARD LENGTH=1023	S-adenosyl-L-methionine-dependent methyltransferases superfamily protein	40.86	48.37	45.37	44.89	3.03	24.49	30.87	24.69	26.56	2.91	-1.69	-1.38	-2.11	*	33.87	37.93	31.26	34.3	2.37	24.15	36.83	24.16	28.31	4.61	-1.21	-0.93	-1.68	0	32.6087	-1.12	0	0	0	0
AT1G17745	AT1G17745_at	PGDH	chr1:6100964-6105265 FORWARD LENGTH=2354	D-3-phosphoglycerate dehydrogenase	242.53	432.37	190.63	288.53	73.86	31.14	57.42	21.46	36.55	11.45	-7.89	-3.99	-17.5	*	297.86	380.76	273.69	317.46	32.73	66.51	118.04	54.23	79.55	19.99	-3.99	-2.69	-6.94	*	32.5815	0.74	0	0	0	0
AT3G58700	AT3G58700_at		chr3:21711563-21712955 FORWARD LENGTH=786	Ribosomal L5P family protein	253.14	234.07	245.24	245.65	8.29	141.6	147.93	163.85	150.65	7.75	-1.63	-1.48	-1.81	*	196.46	148.27	180.01	174.58	15.21	156.58	140.95	139.56	146.02	7.68	-1.2	-1	-1.41	0	32.4324	-1.22	*	0	0	0
AT3G51010	AT3G51010_at		chr3:18946698-18948157 REVERSE LENGTH=858	unknown protein; FUNCTIONS IN: molecular_function unknown; INVOLVED IN: biological_process unknown; LOCATED IN: mitochondrion, plastid; EXPRESSED IN: 22 plant structures; EXPRESSED DURING: 13 growth stages; Has 24 Blast hits to 24 proteins in 9 species: Archae - 0; Bacteria - 0; Metazoa - 0; Fungi - 0; Plants - 24; Viruses - 0; Other Eukaryotes - 0 (source: NCBI BLink).	164.09	159.9	168.62	163.95	4.49	108.34	90.8	121.28	106.91	9.09	-1.53	-1.33	-1.79	*	119.84	126.57	151.66	132.54	10.38	119.49	106.97	139.48	122.29	9.72	-1.08	-0.9	-1.3	0	32.3308	-1.09	0	0	0	0
AT1G04480	AT1G04480_at		chr1:1216095-1217467 FORWARD LENGTH=648	Ribosomal protein L14p/L23e family protein	103.85	89.79	109.87	100.49	7.39	46.85	58.86	49.55	51.68	5.51	-1.94	-1.58	-2.43	*	61.11	61.78	72.99	64.79	5.21	48.7	41.67	56.22	48.82	5.05	-1.33	-1.07	-1.66	0	32.2785	-1.3	*	2.534	0	0
AT2G47110	AT2G47110_at	UBQ6	chr2:19344635-19345345 FORWARD LENGTH=659	ubiquitin 6	90.61	101.75	92.56	94.54	4.61	49.86	52.06	40.84	47.67	3.81	-1.98	-1.71	-2.33	*	78.79	117.97	78.87	91.83	13.57	64.16	52.1	60.26	58.69	4.07	-1.56	-1.16	-2.01	0	32.1637	-0.81	0	0	0	0
AT2G47850	AT2G47850_at		chr2:19595640-19598581 FORWARD LENGTH=2059	Zinc finger C-x8-C-x5-C-x3-H type family protein	179.44	159.12	151.65	163.36	9.3	88.27	93.93	112.61	98.36	8.23	-1.66	-1.41	-1.97	*	182.85	151.41	196.34	176.69	13.65	155.08	135.4	172.69	154.26	11.27	-1.15	-0.96	-1.36	0	31.9149	0.92	0	0	0	0
AT5G44720	AT5G44720_at		chr5:18042971-18044929 FORWARD LENGTH=875	Molybdenum cofactor sulfurase family protein	305.49	346.72	265.6	305.5	24.5	118.42	145.97	68.3	110.87	23.2	-2.76	-1.98	-4.27	*	196.52	253.24	206.61	218.87	18.27	129.1	147.68	136.1	137.7	6.75	-1.59	-1.35	-1.85	*	31.8182	-1.15	0	0	0	0
AT4G26230	AT4G26230_at		chr4:13285825-13286791 FORWARD LENGTH=674	Ribosomal protein L31e family protein	304.89	228.06	348.15	293.97	35.25	139.94	138.29	132.13	137.01	7.21	-2.15	-1.7	-2.63	*	229.55	159.12	200.81	195.76	21.32	110.74	98.09	162.54	123.69	20.44	-1.58	-1.16	-2.26	0	31.7647	-1.14	0	2.328	0	0
AT5G63100	AT5G63100_at		chr5:25314137-25315428 REVERSE LENGTH=1292	S-adenosyl-L-methionine-dependent methyltransferases superfamily protein	78.16	62.53	56.62	65.76	6.7	35.91	42.65	33.09	37.24	3.67	-1.77	-1.39	-2.23	*	40.82	42.55	60.6	47.86	6.52	38.8	40.68	37.54	38.88	1.52	-1.23	-0.95	-1.52	0	31.6547	-1.05	0	0	0	0
AT2G27840	AT2G27840_at	HDT4, HDA13, HDT04	chr2:11861994-11863884 FORWARD LENGTH=880	histone deacetylase-related / HD-related	392.65	391.86	401.77	396.1	5.53	158.4	128.81	116.21	134.5	12.77	-2.94	-2.54	-3.49	*	341.53	245.1	211.33	266.1	39.21	123.9	110.73	111.49	114.92	5.35	-2.32	-1.74	-2.92	*	31.4961	-1.2	0	0	0	0
AT1G26470	AT1G26470_at		chr1:9155091-9156246 FORWARD LENGTH=655	FUNCTIONS IN: molecular_function unknown; INVOLVED IN: regulation of transcription; LOCATED IN: nucleus, H4/H2A histone acetyltransferase complex; EXPRESSED IN: 23 plant structures; EXPRESSED DURING: 15 growth stages; CONTAINS InterPro DOMAIN/s: CT20 (InterPro:IPR012423); Has 60 Blast hits to 60 proteins in 27 species: Archae - 0; Bacteria - 0; Metazoa - 26; Fungi - 2; Plants - 30; Viruses - 0; O…	34.25	29.78	45.64	36.5	5	17.34	10.63	23.76	17.06	4.09	-2.14	-1.4	-3.66	*	23.04	17.24	25.62	21.99	2.71	14.74	13.69	21.33	16.6	2.65	-1.32	-0.96	-1.89	0	31.4286	-1.21	*	0	0	0
AT3G21750	AT3G21750_at	UGT71B1	chr3:7664345-7666195 FORWARD LENGTH=1851	UDP-glucosyl transferase 71B1	76.29	61.56	87.8	75.13	8.1	26.14	23.74	21.85	23.79	3.18	-3.16	-2.39	-4.25	*	80.12	115.07	141.31	112.06	18.29	49.49	52.52	45.21	49.26	3.26	-2.27	-1.64	-2.97	*	31.3808	1.05	0	0	0	0
AT3G08680	AT3G08680_at		chr3:2637560-2640838 FORWARD LENGTH=2648	Leucine-rich repeat protein kinase family protein	442.42	472.36	312.66	409.05	49.73	213.47	234.57	226.68	224.58	9.06	-1.82	-1.44	-2.21	*	650.04	455.44	448.11	518.11	66.05	474.36	373.41	321.87	390.22	44.98	-1.33	-0.99	-1.76	0	31.25	0.94	0	0	0	0
AT5G02280	AT5G02280_at		chr5:469298-470285 FORWARD LENGTH=661	SNARE-like superfamily protein	351.57	313.85	317.16	328.24	13.38	120.78	213.51	216.05	183.25	32.23	-1.79	-1.38	-2.53	*	305.9	222.42	269.81	265.85	24.64	221.16	189.28	263.81	224.67	22.17	-1.18	-0.95	-1.48	0	31.1594	-1.05	0	0	0	0
AT4G18390	AT4G18390_at	TCP2	chr4:10162953-10165562 REVERSE LENGTH=1845	TEOSINTE BRANCHED 1, cycloidea and PCF transcription factor 2	583.58	531.17	447.71	520.45	41.41	169.18	183.17	156.48	169.29	9.49	-3.07	-2.61	-3.6	*	596.82	481.67	513.34	530.02	34.72	255.84	278.07	225.93	252.56	16.85	-2.1	-1.8	-2.45	*	31.0345	0.86	0	0	0	0
AT2G27775	AT2G27775_at		chr2:11842267-11843293 REVERSE LENGTH=693	FUNCTIONS IN: molecular_function unknown; INVOLVED IN: biological_process unknown; LOCATED IN: chloroplast; EXPRESSED IN: 22 plant structures; EXPRESSED DURING: 13 growth stages; BEST Arabidopsis thaliana protein match is: Tetratricopeptide repeat (TPR)-like superfamily protein (TAIR:AT2G27800.1); Has 21 Blast hits to 21 proteins in 5 species: Archae - 0; Bacteria - 0; Metazoa - 0; Fungi - 0; Pla…	87.97	94.15	89.53	90.5	3.43	40.82	42.5	41.58	41.58	2.3	-2.18	-1.95	-2.44	*	80.8	51.24	72.35	68.02	8.89	39.24	37.58	41.11	39.24	1.87	-1.73	-1.35	-2.14	*	30.7692	-1.08	0	0	0	0
AT5G26180	AT5G26180_at		chr5:9149227-9153502 FORWARD LENGTH=2113	S-adenosyl-L-methionine-dependent methyltransferases superfamily protein	114.21	112.41	94.19	107	7.01	73.76	60.33	50.55	61.3	7.19	-1.75	-1.41	-2.21	*	124.5	87.35	89.93	100.55	12.03	92.04	77.88	62.09	77.37	8.88	-1.3	-0.98	-1.71	0	30.4965	-0.86	0	0	0	0
AT4G39300	AT4G39300_at		chr4:18286793-18288345 FORWARD LENGTH=522	unknown protein; FUNCTIONS IN: molecular_function unknown; INVOLVED IN: biological_process unknown; LOCATED IN: chloroplast; EXPRESSED IN: 22 plant structures; EXPRESSED DURING: 13 growth stages; BEST Arabidopsis thaliana protein match is: unknown protein (TAIR:AT5G11630.2); Has 89 Blast hits to 89 proteins in 11 species: Archae - 0; Bacteria - 0; Metazoa - 0; Fungi - 0; Plants - 89; Viruses - 0;…	157.74	189.26	193.56	180.09	12.34	95.54	99.59	127.69	107.28	10.71	-1.68	-1.38	-2.07	*	132.96	112.24	134.66	126.55	7.55	101.45	78.48	131.61	103.93	15.44	-1.22	-0.96	-1.63	0	30.4348	-1.22	*	0	0	0
AT5G27490	AT5G27490_at		chr5:9702835-9704719 REVERSE LENGTH=1210	Integral membrane Yip1 family protein	70.87	71.51	61.95	68.08	4.23	27.77	31.38	27.14	29.08	3.2	-2.34	-1.92	-2.92	*	61.66	48.73	61.2	56.9	5.08	31.74	27.78	40.7	33.46	4.02	-1.7	-1.34	-2.2	*	30.2083	-1	0	0	0	0
AT5G11740	AT5G11740_at	AGP15, ATAGP15	chr5:3784251-3784792 FORWARD LENGTH=542	arabinogalactan protein 15	2794.62	2883.75	2759.54	2801.78	60.16	1897.81	1618.66	1872.38	1797.57	92.15	-1.56	-1.43	-1.71	*	3055.62	2022.7	2031.34	2369.56	342.42	1855.07	1687.18	1849.13	1798.85	61.35	-1.32	-1	-1.64	0	30.0699	-0.95	0	0	0	0
AT1G29310	AT1G29310_at		chr1:10252294-10254690 FORWARD LENGTH=1700	SecY protein transport family protein	229.12	314.95	220.7	254.78	31.4	92.7	130.41	146.04	122.93	17.01	-2.07	-1.53	-2.84	*	186.88	191	186.08	188.24	5.26	155.25	154.78	174.05	161.43	7.49	-1.17	-1.07	-1.28	0	30.0654	-1.07	0	0	1.65	0
AT1G14810	AT1G14810_at		chr1:5102424-5104695 REVERSE LENGTH=1450	semialdehyde dehydrogenase family protein	707.17	827.54	651.04	727.5	56.41	355.75	353.8	300.96	336.08	20.56	-2.16	-1.83	-2.54	*	676.94	613.06	445.67	580.01	70.2	362.12	373.77	346.56	361.86	12.92	-1.6	-1.28	-1.94	*	30.0546	-1	0	0	0	0
AT2G27530	AT2G27530_at	PGY1	chr2:11763217-11764769 REVERSE LENGTH=967	Ribosomal protein L1p/L10e family	284.18	237.87	262.47	261.55	14.23	139.86	142.07	125.41	136.08	6.57	-1.92	-1.7	-2.17	*	197.43	179.74	192.39	190.26	6.47	151.07	149.25	136.54	145.87	6.31	-1.3	-1.19	-1.43	0	30	-1.23	*	0	0	0
AT5G47455	AT5G47455_at		chr5:19250723-19252364 FORWARD LENGTH=536	unknown protein; BEST Arabidopsis thaliana protein match is: unknown protein (TAIR:AT4G17310.2); Has 125 Blast hits to 125 proteins in 13 species: Archae - 0; Bacteria - 0; Metazoa - 0; Fungi - 0; Plants - 125; Viruses - 0; Other Eukaryotes - 0 (source: NCBI BLink).	175.95	163.72	132.04	157.2	13.42	36.27	55.42	67.01	53.3	9.77	-2.95	-2.17	-4.31	*	152.18	96.21	101.9	116.79	17.78	66.28	42.71	54.23	54.41	6.83	-2.15	-1.52	-2.96	*	29.9539	-1.03	0	0	0	0
AT3G23390	AT3G23390_at		chr3:8375372-8376392 FORWARD LENGTH=541	Zinc-binding ribosomal protein family protein	246.19	230.11	291.45	256.86	19.45	93.6	115.2	118.25	108.55	10.51	-2.37	-1.94	-2.92	*	179.52	149.36	182.39	168.85	12.79	90.4	74.27	120.72	94.1	15.6	-1.79	-1.36	-2.52	*	29.8969	-1.27	*	1.924	0	0
AT1G25260	AT1G25260_at		chr1:8853959-8855872 REVERSE LENGTH=1018	Ribosomal protein L10 family protein	481.42	486.14	373.21	446.77	38.36	286.15	262.67	248.51	266.8	13	-1.67	-1.41	-1.96	*	634.85	406.93	388.5	476.63	79.04	414.25	307.97	279.55	333.69	41.08	-1.43	-0.99	-1.99	0	29.7872	0.76	0	0	0	0
AT4G23620	AT4G23620_at		chr4:12314583-12316715 REVERSE LENGTH=1284	Ribosomal protein L25/Gln-tRNA synthetase, anti-codon-binding domain	180.01	165.74	199.05	181.8	10.19	65.1	68.02	74.34	68.94	4.12	-2.64	-2.3	-3.02	*	140.98	115.93	121.46	126.28	8.04	62.72	72.83	68.19	67.65	3.97	-1.87	-1.62	-2.15	*	29.5652	-1.25	*	0	0	0
AT5G27770	AT5G27770_at		chr5:9835885-9837341 FORWARD LENGTH=700	Ribosomal L22e protein family	211.31	226.81	228.78	221.48	9.54	135.86	134.59	159.36	143.41	9.27	-1.54	-1.36	-1.76	*	208.53	149.29	172.82	176.82	17.27	162.85	126.28	159.09	148.63	12.72	-1.19	-0.96	-1.47	0	29.4118	-1.06	0	0	0	0
AT1G31860	AT1G31860_at	AT-IE, HISN2	chr1:11434108-11436607 REVERSE LENGTH=1065	histidine biosynthesis bifunctional protein (HISIE)	109.37	91.87	99.79	100.39	5.24	27.71	33.2	43.84	34.89	5.08	-2.88	-2.28	-3.83	*	101.51	66.95	87.9	85.33	10.12	46.64	36.16	40.7	41.14	3.68	-2.07	-1.61	-2.63	*	29.386	-0.96	0	0	0	0
AT5G24020	AT5G24020_at	MIND, ARC11, ATMIND1	chr5:8116680-8118030 FORWARD LENGTH=1351	septum site-determining protein (MIND)	78.18	95.28	79.91	83.92	6.6	52.75	52.47	33.34	46.02	6.99	-1.82	-1.4	-2.49	*	69.69	63.29	66.65	67.36	2.65	65.43	61.67	54.82	60.56	3.48	-1.11	-0.99	-1.25	0	29.2857	-1.07	0	0	0	0
AT5G03300	AT5G03300_at	ADK2	chr5:796442-799176 FORWARD LENGTH=1348	adenosine kinase 2	244.54	244.41	177.72	222.21	22.89	86.22	95.55	94.29	92.51	5.37	-2.4	-1.95	-2.89	*	223.08	186.57	185.69	199	13.12	140.47	96.29	115.45	117.49	13.05	-1.69	-1.38	-2.12	*	29.2308	-0.9	0	0	0	0
AT3G18490	AT3G18490_at		chr3:6348755-6350668 REVERSE LENGTH=1914	Eukaryotic aspartyl protease family protein	719.83	984.95	602.38	769.25	114.61	189.54	292.4	226.63	236.17	31.51	-3.26	-2.31	-4.53	*	928.91	969.75	917.65	939.21	19.73	561.26	530.2	443.24	510.84	36.73	-1.84	-1.64	-2.09	*	29.0043	0.98	0	0	0	0
AT2G19730	AT2G19730_at		chr2:8511507-8513221 FORWARD LENGTH=721	Ribosomal L28e protein family	161.29	142.89	214.28	172.83	21.58	71.21	80.35	97.14	82.71	8.21	-2.09	-1.59	-2.71	*	123.38	109.53	130.38	121.11	6.59	76.56	58.34	108.03	80.99	14.57	-1.5	-1.13	-2.14	0	28.9308	-1.12	0	1.9	0	0
AT1G16000	AT1G16000_at		chr1:5494533-5495359 FORWARD LENGTH=514	unknown protein; BEST Arabidopsis thaliana protein match is: unknown protein (TAIR:AT1G80890.1); Has 41 Blast hits to 40 proteins in 10 species: Archae - 0; Bacteria - 0; Metazoa - 0; Fungi - 0; Plants - 41; Viruses - 0; Other Eukaryotes - 0 (source: NCBI BLink).	324.82	399.85	390.64	371.98	27.35	190.38	165.83	195.87	184.12	10.67	-2.02	-1.73	-2.35	*	273.22	289.93	344.22	301.74	22.67	220.48	162.08	219.73	200.63	19.64	-1.5	-1.23	-1.86	*	28.9017	-1.04	0	0	0	0
AT1G24625	AT1G24625_at	ZFP7	chr1:8725883-8727212 REVERSE LENGTH=1031	zinc finger protein 7	162.36	175.59	151.65	163.49	9.83	77.78	89.16	75.26	80.44	6.24	-2.03	-1.73	-2.4	*	101.22	103.19	105.97	103.47	3.75	72.02	76.5	78.34	75.47	4.11	-1.37	-1.23	-1.53	*	28.9017	-1.4	*	0	0	0
AT3G59650	AT3G59650_at		chr3:22033129-22034149 FORWARD LENGTH=749	mitochondrial ribosomal protein L51/S25/CI-B8 family protein	69.46	63.71	93.67	75.54	9.35	27.86	38.98	35.52	33.98	3.86	-2.22	-1.67	-2.93	*	41.99	45.3	40.13	42.46	2.41	25.57	22.94	35.81	27.93	4.2	-1.52	-1.19	-2.05	0	28.7425	-1.39	*	0	0	0
AT1G09690	AT1G09690_at		chr1:3136188-3137475 REVERSE LENGTH=759	Translation protein SH3-like family protein	317.2	298.54	332.62	315.77	13.29	142.87	168.06	152.53	154.29	9.49	-2.05	-1.81	-2.32	*	303.22	267.02	334.32	299.29	21.81	191.57	167.19	221.87	193.69	16.3	-1.55	-1.29	-1.86	*	28.7293	-0.92	0	0	0	0
AT2G39710	AT2G39710_at		chr2:16561788-16563380 REVERSE LENGTH=1593	Eukaryotic aspartyl protease family protein	213.52	324.89	246.41	261.21	34.51	66.42	104.76	74.23	82.24	14.45	-3.18	-2.23	-4.7	*	208.4	143.43	139.21	163.58	22.47	57.3	93.57	65.35	71.04	13.23	-2.3	-1.59	-3.49	*	28.6996	-1.16	0	0	0	0
AT4G31790	AT4G31790_at		chr4:15377211-15379025 FORWARD LENGTH=1452	Tetrapyrrole (Corrin/Porphyrin) Methylases	77.2	79.49	82.45	79.52	3.5	33.09	33.04	33.64	33.24	2.83	-2.39	-2.06	-2.82	*	83.33	75.87	66.76	75.1	5.36	44.2	41.87	43.28	43.34	3.1	-1.73	-1.47	-2.05	*	28.6408	-0.93	0	0	0	0
AT3G58830	AT3G58830_at		chr3:21755053-21756641 REVERSE LENGTH=1155	haloacid dehalogenase (HAD) superfamily protein	288.27	251.51	226.73	255.44	18.58	71.44	84.83	84.16	79.78	5.73	-3.2	-2.7	-3.79	*	215.52	221.73	206.61	215.1	5.8	109.61	98.79	100.35	102.88	4.34	-2.09	-1.93	-2.27	*	28.5185	-1.04	0	0	0	0
AT2G40590	AT2G40590_at		chr2:16945045-16946419 REVERSE LENGTH=640	Ribosomal protein S26e family protein	99.3	66.96	158.26	107.75	27.51	40.82	25.44	46.61	36.95	7.61	-2.92	-1.58	-5.01	*	54.94	41.52	64	53.34	7.25	27.91	22.33	44.3	31.49	7.17	-1.69	-1.13	-2.81	0	28.481	-1.13	0	0	0	0
AT5G54580	AT5G54580_at		chr5:22171216-22172977 FORWARD LENGTH=908	RNA-binding (RRM/RBD/RNP motifs) family protein	326.17	285.38	322.88	311.65	14.52	204.38	208.54	204.04	205.32	8.63	-1.52	-1.37	-1.68	*	288.23	215.46	262.24	254.02	22.54	225.75	178.62	228.99	211.48	16.71	-1.2	-0.98	-1.46	0	28.4672	-1.05	0	0	0	0
AT1G50920	AT1G50920_at		chr1:18870139-18872930 FORWARD LENGTH=2394	Nucleolar GTP-binding protein	140.04	101.21	120.72	120.68	11.53	81.62	79.15	63.59	75.04	6.39	-1.61	-1.3	-1.98	*	176.96	125.23	137.67	146.75	15.68	135.9	127.02	125.08	129.5	4.45	-1.13	-0.93	-1.35	0	28.4615	0.95	0	0	0	0
AT3G23810	AT3G23810_at	SAHH2, ATSAHH2	chr3:8587664-8589713 REVERSE LENGTH=1849	S-adenosyl-l-homocysteine (SAH) hydrolase 2	311	215.93	240.76	256.15	28.41	44.06	41.69	36.21	40.48	3.25	-6.33	-5	-7.88	*	317.61	213.17	222.9	251.18	33.29	57.03	46.58	57.71	53.43	4.23	-4.7	-3.58	-5.99	*	28.4	-0.77	0	0	0	0
AT4G19710	AT4G19710_at	AK-HSDH II, AK-HSDH	chr4:10724855-10729665 FORWARD LENGTH=3144	aspartate kinase-homoserine dehydrogenase ii	221.62	217.2	198.96	212.62	8.26	83.96	91.93	64.36	79.89	8.93	-2.66	-2.22	-3.29	*	228.47	188.54	188.83	202.21	13.92	116.5	113.25	100.17	109.82	5.75	-1.84	-1.59	-2.12	*	28.3784	-0.93	0	0	0	0
AT2G24050	AT2G24050_at	eIFiso4G2	chr2:10225225-10228638 REVERSE LENGTH=2701	MIF4G domain-containing protein / MA3 domain-containing protein	138.86	141.16	131	136.87	4.49	66.02	69.65	58.2	64.68	4.45	-2.12	-1.87	-2.41	*	140.21	112.29	104.72	119.22	10.9	78.25	73.31	73.26	74.87	2.9	-1.59	-1.34	-1.86	*	28.3422	-0.99	0	0	0	0
AT1G55910	AT1G55910_at	ZIP11	chr1:20906134-20907413 FORWARD LENGTH=1196	zinc transporter 11 precursor	360.16	513.87	366.67	413.63	51.46	59.95	70.33	46.56	58.39	8.58	-7.08	-5.17	-9.88	*	300.04	443.76	343.1	361.98	44.07	56.89	94.68	37.71	62.8	17.45	-5.76	-3.71	-10.86	*	28.2398	-0.85	0	0	0	0
AT3G28930	AT3G28930_at	AIG2	chr3:10959686-10960808 REVERSE LENGTH=797	AIG2-like (avirulence induced gene) family protein	86.02	101.02	71.7	86.16	9.97	24.81	25.25	19.04	23.08	2.82	-3.73	-2.82	-4.96	*	82.6	97.09	75.5	85.14	7.52	31.74	38.99	29.97	33.48	3.58	-2.54	-2.03	-3.22	*	28.0142	-0.79	0	2.087	8.197	0.547
AT3G53890	AT3G53890_at		chr3:19955344-19956345 REVERSE LENGTH=550	Ribosomal protein S21e	277.27	256.59	298.47	276.97	14.45	134.21	112.48	133.84	127.19	8.44	-2.18	-1.9	-2.51	*	195.8	140.15	190.21	174.15	19.21	88.69	81.35	119.95	96.36	12.38	-1.81	-1.37	-2.41	*	27.8947	-1.32	*	0	0	0
AT1G22780	AT1G22780_at	PFL, RPS18A, PFL1	chr1:8067864-8069342 FORWARD LENGTH=764	Ribosomal protein S13/S18 family	264.48	286	291.33	279.8	12.81	163.98	161.32	147.69	157.55	8.68	-1.78	-1.58	-2	*	190.59	185.87	201.58	191.63	8.38	134.25	155.73	152.05	144.83	12.37	-1.32	-1.14	-1.56	0	27.8481	-1.32	*	2.148	0	0
AT5G39800	AT5G39800_at		chr5:15935464-15937132 FORWARD LENGTH=597	Mitochondrial ribosomal protein L27	60.34	69.85	65.69	64.57	4.01	41.05	25.9	29.34	32.4	5.5	-1.99	-1.52	-2.8	*	66.72	57.45	53.84	59.64	4.38	43.5	51	30.27	41.59	6.54	-1.43	-1.1	-1.97	0	27.6316	-0.93	0	0	0	0
AT2G45710	AT2G45710_at		chr2:18831161-18832211 FORWARD LENGTH=549	Zinc-binding ribosomal protein family protein	159.03	180.74	169.59	169.38	8.06	64.48	83.57	73.7	73.81	6.94	-2.29	-1.94	-2.76	*	114.61	83.75	82.61	94.1	10.82	56.32	48.36	55.17	53	3.58	-1.78	-1.41	-2.19	*	27.3196	-1.49	*	2.501	0	0
AT5G51820	AT5G51820_at	PGM, ATPGMP, PGM1, STF1	chr5:21063368-21068057 REVERSE LENGTH=2159	phosphoglucomutase	302.31	254.2	290.79	282.46	14.62	65.51	59.42	60.2	61.59	3.49	-4.59	-4.04	-5.21	*	258.6	309.21	311.17	292.89	18.39	89.47	83.75	91.07	87.92	3.48	-3.33	-2.94	-3.75	*	27.2277	0.91	0	0	0	0
AT3G62110	AT3G62110_at		chr3:22997031-23000041 REVERSE LENGTH=2142	Pectin lyase-like superfamily protein	172.96	135.91	173.97	161.01	12.65	102.02	92.93	70.63	88.36	9.76	-1.82	-1.47	-2.3	*	91.13	115.74	111.44	105.92	8.6	84.39	89.74	73.28	82.58	5.85	-1.28	-1.07	-1.53	0	27.2109	-1.26	*	0	0	0
AT5G62730	AT5G62730_at		chr5:25197494-25200033 FORWARD LENGTH=1770	Major facilitator superfamily protein	102.75	87.66	65.2	85.2	11.3	24.18	22.39	19.3	22.11	3.63	-3.85	-2.73	-5.58	*	65.86	38.38	57.47	53.8	8.36	17.89	19.13	20.57	19.04	2.45	-2.83	-1.99	-3.93	*	27.1062	-1.13	0	0	0	0
AT5G60670	AT5G60670_at		chr5:24380910-24381593 REVERSE LENGTH=684	Ribosomal protein L11 family protein	60.39	42.76	61.97	55.31	6.38	29.14	27.87	26.68	27.72	2.48	-2	-1.55	-2.53	*	41.91	33.24	38.16	37.68	2.89	27.99	26.32	30.17	28.12	1.83	-1.34	-1.13	-1.58	0	27.0968	-1.15	0	0	0	0
AT3G01820	AT3G01820_at		chr3:293754-295458 REVERSE LENGTH=1120	P-loop containing nucleoside triphosphate hydrolases superfamily protein	291.36	273.28	273.01	278.59	8	178.77	158.74	168.8	169.55	6.79	-1.64	-1.52	-1.78	*	266.07	186.18	210.65	221.08	23.62	160.82	137.89	178.31	159.06	12.25	-1.39	-1.11	-1.72	0	26.9737	-1.06	0	0	0	0
AT5G23740	AT5G23740_at	RPS11-BETA	chr5:8008010-8009436 REVERSE LENGTH=827	ribosomal protein S11-beta	632.63	501.64	674.87	603.14	53.35	340.89	309.19	349.43	332.96	13.9	-1.81	-1.53	-2.11	*	489.17	346.34	440.12	423.63	42.79	276.59	243.11	357.5	291.89	34.71	-1.45	-1.12	-1.89	0	26.7974	-1.14	0	0	0	0
AT3G22300	AT3G22300_at	RPS10	chr3:7885668-7886820 FORWARD LENGTH=1002	ribosomal protein S10	259.77	288.25	213.58	254.03	22.75	105.91	118.88	122.08	115.27	6.08	-2.2	-1.84	-2.6	*	280.67	185.73	223.96	230.16	27.47	164.32	102.49	104.36	123.73	20.26	-1.86	-1.35	-2.67	*	26.6304	-0.87	0	0	0	0
AT3G12700	AT3G12700_at		chr3:4037070-4039134 FORWARD LENGTH=1543	Eukaryotic aspartyl protease family protein	134.71	194.46	132.95	154.06	20.75	82.79	73.49	89.87	81.83	5.68	-1.88	-1.43	-2.38	*	106.2	67.16	93.13	88.84	11.46	67.54	62.6	68.42	66.08	2.69	-1.34	-1.05	-1.65	0	26.5734	-1.27	*	0	0	0
AT2G15620	AT2G15620_at	NIR1, NIR, ATHNIR	chr2:6810476-6812939 FORWARD LENGTH=2110	nitrite reductase 1	143.48	148.98	169.41	152.44	10.48	99.64	110.59	66.51	92.2	13.86	-1.65	-1.28	-2.24	*	135.96	128.75	103.18	122.63	10.6	92.55	126.91	67.89	95.69	17.7	-1.28	-0.94	-1.88	0	26.5625	-1.04	0	0	0	0
AT1G60850	AT1G60850_at	ATRPAC42, AAC42	chr1:22397916-22400312 REVERSE LENGTH=1560	DNA-directed RNA polymerase family protein	56.3	54.68	46.05	52.56	4.01	25.98	22.83	22.53	23.77	2.27	-2.21	-1.81	-2.72	*	54.62	41.26	42.86	46.05	4.8	29.4	28.25	21.48	26.51	3.28	-1.74	-1.33	-2.29	*	26.5193	-0.93	0	0	0	0
AT2G17360	AT2G17360_at		chr2:7546480-7548313 FORWARD LENGTH=1079	Ribosomal protein S4 (RPS4A) family protein	338.51	384.57	351.68	358.38	15.54	249.5	241.92	205.57	232.1	14.67	-1.54	-1.36	-1.76	*	274.23	315.4	262.62	284.24	17.15	216.68	269.5	246.7	244	17.04	-1.16	-1	-1.36	0	26.4706	-1.12	0	0	0	0
AT1G54990	AT1G54990_at	AXR4, RGR, RGR1	chr1:20511519-20513681 FORWARD LENGTH=1660	alpha/beta-Hydrolases superfamily protein	95.1	94.01	115.8	101.88	7.77	41.51	39.88	40.9	40.66	3.49	-2.51	-2.08	-3.04	*	82.76	74.15	82.26	79.49	4.17	41.07	33.3	51.51	41.86	5.5	-1.9	-1.53	-2.45	*	26.4423	-1.1	0	0	0	0
AT4G17600	AT4G17600_at	LIL3:1	chr4:9803705-9804872 FORWARD LENGTH=1001	Chlorophyll A-B binding family protein	271.03	204.28	279.3	251.38	23.98	76.05	92.45	64.22	77.48	9.09	-3.24	-2.54	-4.2	*	149.07	181.32	251.63	193.93	30.59	71.91	70.5	84.94	75.68	5.18	-2.56	-1.87	-3.33	*	26.378	-0.97	0	0	0.519	0
AT3G16330	AT3G16330_at		chr3:5535196-5536063 FORWARD LENGTH=868	unknown protein; BEST Arabidopsis thaliana protein match is: unknown protein (TAIR:AT1G52140.1); Has 109 Blast hits to 109 proteins in 16 species: Archae - 0; Bacteria - 0; Metazoa - 0; Fungi - 0; Plants - 109; Viruses - 0; Other Eukaryotes - 0 (source: NCBI BLink).	110.64	94.8	107.15	103.95	5.64	34.67	36.13	28.78	32.98	3.88	-3.15	-2.58	-3.97	*	85.89	62.2	59.59	68.83	8.68	26.9	25.89	28.49	27.11	3.15	-2.54	-1.9	-3.37	*	26.3566	-1.22	*	0	0	0
AT2G37190	AT2G37190_at		chr2:15619407-15620119 REVERSE LENGTH=713	Ribosomal protein L11 family protein	46.35	38.29	32.4	39.2	4.41	20.27	20.86	22.19	21	1.59	-1.87	-1.48	-2.32	*	49.76	33.28	38.1	40.35	5.01	31.56	27.17	27.5	28.89	2	-1.4	-1.09	-1.74	0	26.3514	0.77	0	2.196	0	0
AT5G55120	AT5G55120_at	VTC5	chr5:22369095-22371867 FORWARD LENGTH=1874	galactose-1-phosphate guanylyltransferase (GDP)s;GDP-D-glucose phosphorylases;quercetin 4'-O-glucosyltransferases	69.77	54.86	92.17	72.14	11.05	28.3	35.07	25.42	29.85	3.78	-2.42	-1.71	-3.34	*	62.85	63.6	79.05	68.45	5.98	45.53	47.13	44.15	45.64	2.33	-1.5	-1.26	-1.76	*	26.3158	-0.77	0	0	0	0
AT3G25940	AT3G25940_at		chr3:9494697-9496092 FORWARD LENGTH=590	TFIIB zinc-binding protein	137.09	105.23	96.92	113.65	12.65	69.67	49.82	57.88	59.03	6.25	-1.93	-1.49	-2.48	*	112.62	72.75	66.19	83.27	14.76	61.56	50.24	44.85	51.69	5.6	-1.61	-1.1	-2.23	0	26.1745	-0.98	0	0	0	0
AT1G48630	AT1G48630_at	RACK1B_AT	chr1:17981773-17983327 REVERSE LENGTH=1244	receptor for activated C kinase 1B	181.81	178.89	208.42	188.31	12.63	69.67	66.91	77.56	71.65	6.73	-2.63	-2.18	-3.2	*	125.96	102.84	103.68	111.34	8.66	55.16	60.3	55.49	56.35	5.51	-1.98	-1.61	-2.44	*	26.1468	-1.43	*	0	0	0
AT5G50810	AT5G50810_at	TIM8	chr5:20675634-20676612 REVERSE LENGTH=582	translocase inner membrane subunit 8	127.38	120.53	133.16	127.47	4.6	75.14	59.82	62.75	65.81	5.14	-1.94	-1.69	-2.25	*	88.17	71.02	80.82	79.82	5.34	59.22	46.45	56.66	54.23	4.17	-1.47	-1.25	-1.75	*	26.0355	-1.41	*	2.887	0	0
AT4G01590	AT4G01590_at		chr4:688881-690415 REVERSE LENGTH=1022	unknown protein; BEST Arabidopsis thaliana protein match is: Arabidopsis protein of unknown function (DUF241) (TAIR:AT4G35680.1); Has 1908 Blast hits to 1345 proteins in 175 species: Archae - 3; Bacteria - 106; Metazoa - 494; Fungi - 346; Plants - 115; Viruses - 71; Other Eukaryotes - 773 (source: NCBI BLink).	250.39	299.36	285.73	279.01	16.38	176.18	198.42	191.84	189.06	7.76	-1.48	-1.31	-1.66	*	249.09	209.33	165.51	208.82	24.92	171.06	182.77	152.83	169.22	10.63	-1.23	-0.97	-1.52	0	25.9542	-1.09	0	0	0	0
AT2G03120	AT2G03120_at	ATSPP, SPP	chr2:937420-940339 FORWARD LENGTH=1425	signal peptide peptidase	520.88	729.94	618.57	622.64	63.12	356.71	414.4	355.12	374.53	22.59	-1.66	-1.35	-2	*	381.69	568.59	457.11	468.9	55.79	314.35	404.56	377.43	364.96	28.81	-1.28	-1	-1.61	0	25.9259	-1.03	0	1.689	2.583	0
AT5G11340	AT5G11340_at		chr5:3619155-3621301 FORWARD LENGTH=799	Acyl-CoA N-acyltransferases (NAT) superfamily protein	184.48	179.96	200.77	189.12	7.38	124.59	115.73	136.26	125.2	7.25	-1.51	-1.35	-1.7	*	122.36	104.45	113.25	113.33	5.75	100.06	85.71	109.83	98.38	7.41	-1.15	-1	-1.34	0	25.9259	-1.5	*	0	0	0
AT4G26670	AT4G26670_at		chr4:13452117-13453984 FORWARD LENGTH=1178	Mitochondrial import inner membrane translocase subunit Tim17/Tim22/Tim23 family protein	326.71	229.53	364.97	307.93	40.13	151.89	149.56	179.56	160.78	10.91	-1.92	-1.47	-2.41	*	178.43	170.96	265.78	204.97	31.22	114.21	132.89	161.29	135.95	14.43	-1.51	-1.09	-2.03	0	25.8503	-1.08	0	0	0	0
AT5G16130	AT5G16130_at		chr5:5268421-5270156 FORWARD LENGTH=946	Ribosomal protein S7e family protein	531.3	455.49	355.21	447.9	52.39	178.2	207.48	159.43	182.78	16.38	-2.45	-1.9	-3.11	*	544.11	404.53	422.84	456.91	44.11	298.85	219.05	263.85	259.57	24	-1.76	-1.41	-2.2	*	25.7895	0.8	0	0	0	0
AT2G25210	AT2G25210_at		chr2:10739855-10740552 FORWARD LENGTH=402	Ribosomal protein L39 family protein	722.61	747.56	719.96	727.98	18.59	436.38	503.03	487.98	474.92	23.48	-1.53	-1.4	-1.68	*	568.22	479.61	514.28	518.33	28.09	462.02	418.28	466.7	448.27	16.6	-1.16	-1.04	-1.29	0	25.7143	-1.28	*	0	0	0
AT5G41600	AT5G41600_at	BTI3, RTNLB4	chr5:16636130-16637693 FORWARD LENGTH=1095	VIRB2-interacting protein 3	102.95	83.79	114.14	100.14	9.19	65.64	60.48	68.28	64.57	3.38	-1.55	-1.29	-1.83	*	96.02	69.64	94.16	86.32	9.01	52.89	63.91	85.68	67.51	9.92	-1.28	-0.96	-1.76	0	25.5814	-0.92	0	0	0	0
AT1G41880	AT1G41880_at		chr1:15651027-15652542 REVERSE LENGTH=729	Ribosomal protein L35Ae family protein	112.14	96.43	121.95	111.03	9.17	39.47	63.75	58.93	53.36	10.08	-2.08	-1.53	-3.08	*	73.58	77.34	80.92	76.93	4.78	40.11	63.08	55.33	51.94	8.58	-1.48	-1.14	-2.06	0	25.4902	-1.21	*	0	0	0
AT5G13490	AT5G13490_at	AAC2	chr5:4335467-4337628 FORWARD LENGTH=1516	ADP/ATP carrier 2	205.24	312.07	182.96	233.59	40.68	65.07	70.87	47.26	61.26	7.85	-3.81	-2.59	-5.39	*	354.84	156.75	163.33	224.83	64.72	69.86	62.84	47.74	60.23	7.07	-3.73	-1.93	-5.83	*	25.4826	-0.62	0	3.137	0	0
AT4G31985	AT4G31985_at		chr4:15469895-15470559 FORWARD LENGTH=385	Ribosomal protein L39 family protein	443.64	383.18	405.62	411.15	22.76	218.38	217.78	212.64	217.09	7	-1.89	-1.7	-2.1	*	365.91	218.61	258.93	280.44	44.3	164.91	133.55	179.07	158.76	14.12	-1.77	-1.27	-2.34	*	25.2941	-1.14	0	0	0	0
AT1G03360	AT1G03360_at	ATRRP4, RRP4	chr1:824537-826358 FORWARD LENGTH=1264	ribosomal RNA processing 4	104.14	81.25	89.18	91.49	6.9	47.44	45.74	39.73	44.23	3.29	-2.07	-1.74	-2.46	*	51.03	71.62	72.69	65.5	7.67	33.66	43.8	39.1	39.07	3.64	-1.68	-1.3	-2.14	*	25.2874	-1.12	0	0	0	0
AT4G10450	AT4G10450_at		chr4:6462953-6464544 REVERSE LENGTH=919	Ribosomal protein L6 family	103.97	105.33	99.77	103.1	4.9	43.38	37.3	46.17	42.23	3.41	-2.44	-2.1	-2.87	*	74.25	53.57	53.4	60.48	7.04	32.24	26.82	32.01	29.99	2.65	-2.02	-1.57	-2.55	*	25.2381	-1.4	*	0	0	0
AT3G03600	AT3G03600_at	RPS2	chr3:867660-868578 REVERSE LENGTH=919	ribosomal protein S2	92.69	95.62	87.54	91.68	3.98	57.07	50.07	64.07	56.9	4.73	-1.61	-1.39	-1.89	*	76.76	62.07	67.5	68.97	4.64	46.26	61.27	57.47	54.75	5.36	-1.26	-1.04	-1.55	0	25.1799	-1.17	0	0	0	0
AT1G73940	AT1G73940_at		chr1:27798313-27799596 REVERSE LENGTH=736	unknown protein; BEST Arabidopsis thaliana protein match is: unknown protein (TAIR:AT5G49410.2); Has 54 Blast hits to 54 proteins in 11 species: Archae - 0; Bacteria - 0; Metazoa - 0; Fungi - 0; Plants - 54; Viruses - 0; Other Eukaryotes - 0 (source: NCBI BLink).	469.15	417.62	443.95	445.41	16.88	207.61	234.93	232.83	224.21	11.81	-1.99	-1.79	-2.22	*	430.15	324.6	359.51	371.73	31.92	257.48	217.2	223.96	232.48	13.56	-1.6	-1.34	-1.89	*	25.1397	-1.03	0	0	0	0
AT5G16070	AT5G16070_at		chr5:5247354-5251179 REVERSE LENGTH=1932	TCP-1/cpn60 chaperonin family protein	177.2	206.84	165.93	182.81	14.62	128.47	104.64	82.65	105.47	14.27	-1.73	-1.36	-2.29	*	200.01	156.13	155.86	170.67	14.82	159.24	130.77	119.88	135.78	12.35	-1.26	-1.02	-1.55	0	25	-0.88	0	0	0	0
AT5G17000	AT5G17000_at		chr5:5584801-5587063 REVERSE LENGTH=1292	Zinc-binding dehydrogenase family protein	96.37	120.25	113.47	108.96	10.53	26.13	28.98	40.33	31.52	5.15	-3.46	-2.57	-4.88	*	81.02	40.37	65.71	62.55	11.86	22.53	22.56	20.15	21.92	1.69	-2.85	-1.93	-3.87	*	24.9027	-1.26	*	0	0	0
AT5G27620	AT5G27620_at	CYCH;1	chr5:9771324-9774875 FORWARD LENGTH=1640	cyclin H;1	79.2	68.11	64.82	70.76	4.64	31.77	34.98	41.36	36.09	3.74	-1.96	-1.61	-2.42	*	63.42	57.44	70.41	63.78	4.13	51.56	39.89	28.77	40.1	6.8	-1.59	-1.21	-2.24	*	24.8447	-0.95	0	0	0	0
AT1G01100	AT1G01100_at		chr1:50075-51199 REVERSE LENGTH=631	60S acidic ribosomal protein family	288.58	247.62	330.14	288.27	24.4	160.94	156.87	163.57	160.73	4.5	-1.79	-1.53	-2.06	*	214.4	197.64	252.43	220.54	17.26	129.81	143.62	187.75	153.71	17.94	-1.43	-1.15	-1.83	0	24.8366	-1.08	0	0	0	0
AT5G64080	AT5G64080_at		chr5:25645263-25646728 REVERSE LENGTH=839	Bifunctional inhibitor/lipid-transfer protein/seed storage 2S albumin superfamily protein	246.12	215.63	189.9	217.25	16.7	35.76	57.04	48.24	47.17	7.62	-4.61	-3.51	-6.4	*	244.82	127.29	161.41	177.84	34.8	42.31	48.47	44.03	44.91	3.39	-3.96	-2.64	-5.4	*	24.7863	-0.89	0	0	0	0
AT2G20940	AT2G20940_at		chr2:9002032-9002701 REVERSE LENGTH=670	Protein of unknown function (DUF1279)	142.25	109.55	158.77	136.63	14.65	60.38	53.92	68.2	60.85	5.03	-2.25	-1.78	-2.79	*	91.55	66.78	97.3	85.14	9.56	45.44	35.9	59.73	46.85	7.18	-1.82	-1.34	-2.54	*	24.7191	-1.24	*	0	0	0
AT2G17250	AT2G17250_at	EMB2762	chr2:7499477-7503125 FORWARD LENGTH=1998	CCAAT-binding factor	377.13	427.76	283.01	362.75	43.27	189.77	206.63	174.11	190.32	11.15	-1.91	-1.5	-2.34	*	521.44	339.47	304.72	388.35	67.16	277.51	235.66	205.89	239.69	21.03	-1.62	-1.13	-2.18	0	24.6667	0.73	0	0	0	0
AT4G14320	AT4G14320_at		chr4:8241732-8243910 REVERSE LENGTH=679	Zinc-binding ribosomal protein family protein	179.82	188.45	186.18	185.22	4.85	102.16	101.06	123.9	109.25	8.09	-1.7	-1.5	-1.94	*	131.2	115.18	149.68	131.96	10.16	81.71	82.59	114.74	92.94	11.06	-1.42	-1.13	-1.82	0	24.6667	-1.24	*	0	0	0
AT1G08220	AT1G08220_at		chr1:2581510-2583321 REVERSE LENGTH=927	FUNCTIONS IN: molecular_function unknown; INVOLVED IN: mitochondrial proton-transporting ATP synthase complex assembly; LOCATED IN: mitochondrial inner membrane; EXPRESSED IN: 18 plant structures; EXPRESSED DURING: 7 growth stages; CONTAINS InterPro DOMAIN/s: ATPase assembly factor ATP10, mitochondria (InterPro:IPR007849); Has 152 Blast hits to 152 proteins in 76 species: Archae - 6; Bacteria - 0…	84.8	106.95	84.84	92.18	8.33	34.5	33.14	36.81	34.65	3.17	-2.66	-2.15	-3.29	*	79.58	64.66	56.28	66.63	7.05	36.06	30.19	32.29	32.93	2.49	-2.02	-1.62	-2.49	*	24.6512	-1.1	0	0	0	0
AT3G16100	AT3G16100_at	ATRABG3C, ATRAB7D, RABG3c	chr3:5459172-5460790 FORWARD LENGTH=953	RAB GTPase homolog G3C	169.6	161.9	211.68	180.55	17.28	101.53	111.7	101.81	104.72	6.43	-1.72	-1.42	-2.07	*	143.57	126.99	123.77	131.63	7	82.26	73.5	125.51	93.28	17	-1.41	-1.07	-2.03	0	24.6479	-1.13	0	0	0	0
AT1G22270	AT1G22270_at		chr1:7865481-7866139 FORWARD LENGTH=659	Trm112p-like protein	255.79	251.79	212.96	240.47	14.14	168.29	169.95	184.99	174.33	6.75	-1.38	-1.22	-1.55	*	191.48	125.6	160.69	159.28	18.91	123.73	125.03	156.15	134.59	11.15	-1.18	-0.92	-1.49	0	24.5902	-1.23	*	0	0	0
AT2G47790	AT2G47790_at		chr2:19570964-19573027 REVERSE LENGTH=1398	Transducin/WD40 repeat-like superfamily protein	162.62	158.38	137.58	152.93	8.8	100.94	86.09	80.92	89.1	6.85	-1.72	-1.47	-2.02	*	133.36	140.36	150.35	141.2	6.58	111.29	108.98	122.38	114.83	5.13	-1.23	-1.11	-1.37	0	24.4898	-0.96	0	0	0	0
AT4G04210	AT4G04210_at	PUX4	chr4:2030319-2031853 FORWARD LENGTH=1167	plant UBX domain containing protein 4	189.9	191.49	180.98	187.43	6.39	82.71	65.07	74.14	74.25	5.75	-2.52	-2.21	-2.92	*	147.42	124.98	145.1	139.21	7.69	66.56	66.95	81.32	71.29	5.78	-1.95	-1.67	-2.31	*	24.4344	-1.21	*	0	0	0
AT1G63970	AT1G63970_at	ISPF, MECPS	chr1:23738691-23740336 REVERSE LENGTH=904	isoprenoid F	334.27	295.43	342.41	324.48	15.04	131.85	157.93	154.9	148.11	9.55	-2.19	-1.93	-2.5	*	219.93	247.46	275.99	247.65	16.94	139.82	125.61	163.29	142.7	11.38	-1.74	-1.46	-2.07	*	24.3523	-1.15	0	0	0	0
AT5G59850	AT5G59850_at		chr5:24112200-24113617 REVERSE LENGTH=803	Ribosomal protein S8 family protein	351.72	355	453.11	386	34.39	121.32	148.75	140.32	137.11	10.88	-2.82	-2.3	-3.42	*	237.24	220.68	248.01	235.5	9.77	108.58	99.73	135.4	114.27	11.46	-2.06	-1.74	-2.5	*	24.3478	-1.38	*	0	0	0
AT5G59180	AT5G59180_at	NRPB7	chr5:23883417-23885208 FORWARD LENGTH=845	DNA-directed RNA polymerase II	64.68	69.35	67.42	67.1	2.51	34.39	31.84	37.87	34.62	2.73	-1.94	-1.69	-2.25	*	42.3	35.88	44.15	40.88	2.83	27.06	29.06	26.58	27.56	1.55	-1.48	-1.28	-1.72	*	24.2604	-1.45	*	0	0	0
AT4G28360	AT4G28360_at		chr4:14029009-14031040 REVERSE LENGTH=1215	Ribosomal protein L22p/L17e family protein	70.14	49.57	48.48	56.31	7.25	14.38	20.19	22.32	19.1	4.36	-2.95	-1.98	-4.89	*	56.86	44.62	48.65	49.46	4.43	26.39	24.85	27.54	26.52	2.5	-1.86	-1.5	-2.32	*	24.2424	-0.87	0	0	0	0
AT2G35190	AT2G35190_at	NPSN11, ATNPSN11, NSPN11	chr2:14830626-14833319 FORWARD LENGTH=1599	novel plant snare 11	95.41	88.28	70.49	84.82	7.87	66.8	40.37	46.2	51.03	8.26	-1.66	-1.24	-2.33	*	158.5	81.16	96.61	111.94	23.54	95.75	61.13	65.08	73.88	11.03	-1.52	-0.94	-2.28	0	24.1935	0.85	0	0	0	0
AT4G24270	AT4G24270_at	EMB140	chr4:12581601-12587384 REVERSE LENGTH=2706	EMBRYO DEFECTIVE 140	69.31	84.15	46.64	66.7	11.2	42.7	38.87	31.41	37.69	3.87	-1.77	-1.24	-2.41	*	126.06	91.96	101.33	106.4	10.23	104.14	91.44	63.96	86.41	12.02	-1.23	-0.94	-1.66	0	24.1935	1.18	0	0	0	0
AT1G14980	AT1G14980_at	CPN10	chr1:5165628-5166745 REVERSE LENGTH=690	chaperonin 10	504.77	476.65	552.78	510.66	24.34	190.25	188.19	198.55	192.85	6.67	-2.65	-2.4	-2.91	*	362.54	377.93	451.6	397.37	29.14	170.58	174.65	205.99	184.23	12.98	-2.16	-1.82	-2.55	*	24.1667	-1.12	0	2.257	0	0
AT3G11510	AT3G11510_at		chr3:3623457-3624940 REVERSE LENGTH=827	Ribosomal protein S11 family protein	267.45	276.42	333.26	291.17	22.71	118.2	150.71	155.68	142.01	14.68	-2.05	-1.66	-2.56	*	182.26	159.39	206.94	183.87	14.69	97.06	98.89	144.85	112.8	16.46	-1.63	-1.26	-2.2	*	24.0964	-1.32	*	0	0	0
AT3G27080	AT3G27080_at	TOM20-3	chr3:9985079-9986629 REVERSE LENGTH=811	translocase of outer membrane 20 kDa subunit 3	225.16	267.75	234.1	241.41	14.66	180.09	169.88	139.88	163.98	12.84	-1.47	-1.25	-1.74	*	163.42	204.41	170.49	179.5	13.92	160.73	169.46	159.19	163.63	4.8	-1.1	-0.95	-1.25	0	24	-1.15	0	0	0	0
AT4G25320	AT4G25320_at		chr4:12954077-12956543 FORWARD LENGTH=1827	AT hook motif DNA-binding family protein	160.55	193.98	189.19	180.42	12.31	117.55	113.32	109.83	114.06	4.98	-1.58	-1.38	-1.8	*	168.36	138.95	135.82	147.4	11.09	118.02	120.01	124.91	120.93	4.61	-1.22	-1.05	-1.39	0	23.913	-1.04	0	0	0	0
AT3G08980	AT3G08980_at		chr3:2740808-2742685 FORWARD LENGTH=792	Peptidase S24/S26A/S26B/S26C family protein	79.76	75.43	68.16	74.72	4.09	34.67	42.97	40.55	39.45	3.78	-1.89	-1.59	-2.29	*	72.7	63.32	67.45	67.49	3.55	49.12	51.9	39.64	47.06	4.5	-1.43	-1.21	-1.73	*	23.8994	-0.98	0	0	0	0
AT1G77610	AT1G77610_at		chr1:29165210-29167773 FORWARD LENGTH=1577	EamA-like transporter family protein	421.27	472.07	487.88	460.33	22.85	319.28	304.43	310.27	311.24	8.36	-1.48	-1.34	-1.62	*	387.32	367.39	290.94	350.09	31.07	272.56	306.52	278.81	285.89	15.26	-1.22	-1.02	-1.44	0	23.8806	-1.12	0	0	0	0
AT5G41520	AT5G41520_at		chr5:16609153-16610692 REVERSE LENGTH=874	RNA binding Plectin/S10 domain-containing protein	466.28	429.76	508.36	471.69	26.41	293.26	301.28	349.15	315.07	20.15	-1.5	-1.3	-1.73	*	369.68	322.12	344.46	346.05	16.39	277.33	238.05	350.68	287.83	33.99	-1.2	-0.99	-1.51	0	23.8462	-1.21	*	0	0	0
AT2G37600	AT2G37600_at		chr2:15774245-15775278 REVERSE LENGTH=582	Ribosomal protein L36e family protein	444.69	400.22	455.15	433.61	17.75	177.72	224.67	158.48	186.97	20.66	-2.32	-1.93	-2.86	*	386.07	274.76	365.18	341.47	34.45	182.03	187.29	206.74	191.81	8.55	-1.78	-1.47	-2.11	*	23.8342	-1.07	0	2.755	0	0
AT5G51770	AT5G51770_at		chr5:21031030-21032994 FORWARD LENGTH=1965	Protein kinase superfamily protein	47.94	58.87	43.54	50.16	5.16	33.22	33.12	25.79	30.69	3.61	-1.63	-1.26	-2.13	*	52.34	42.28	40.45	44.92	4.18	29.13	40.3	40.51	36.47	4.57	-1.23	-0.96	-1.61	0	23.8095	-0.88	0	0	0	0
AT4G20440	AT4G20440_at		chr4:11022313-11023736 REVERSE LENGTH=1143	small nuclear ribonucleoprotein associated protein B	35.19	34.9	26.43	32.28	3.15	14.97	19.82	16.31	17.1	2.06	-1.89	-1.47	-2.46	*	28.73	28.54	28.78	28.68	1.22	24.16	15.9	22.78	20.85	2.75	-1.38	-1.12	-1.77	0	23.8095	-0.93	0	0	0	0
AT2G41650	AT2G41650_at		chr2:17363907-17364434 FORWARD LENGTH=447	unknown protein; FUNCTIONS IN: molecular_function unknown; INVOLVED IN: biological_process unknown; LOCATED IN: chloroplast; EXPRESSED IN: 22 plant structures; EXPRESSED DURING: 13 growth stages; Has 3 Blast hits to 3 proteins in 1 species: Archae - 0; Bacteria - 0; Metazoa - 0; Fungi - 0; Plants - 3; Viruses - 0; Other Eukaryotes - 0 (source: NCBI BLink).	44.2	38.45	48.6	43.61	3.3	21.71	19.11	24.42	21.66	2.22	-2.01	-1.64	-2.5	*	35.61	25.74	27.52	29.61	3.27	21.49	11.25	18.22	16.98	3.09	-1.74	-1.25	-2.58	*	23.7805	-1.19	0	0	0	0
AT1G55500	AT1G55500_at	ECT4	chr1:20719548-20722739 FORWARD LENGTH=2267	evolutionarily conserved C-terminal region 4	142.58	145.46	122.65	136.63	8.37	60.04	42.74	48.94	50.72	5.28	-2.69	-2.23	-3.32	*	152.75	104.38	88.17	115.12	19.38	53.3	48.18	40.79	47.76	4.14	-2.41	-1.7	-3.22	*	23.7668	-0.91	0	0	0	0
AT3G20330	AT3G20330_at	PYRB	chr3:7090106-7092670 REVERSE LENGTH=1741	PYRIMIDINE B	126.6	108.39	115.5	116.95	5.91	52.69	64.85	53.61	57	5.09	-2.05	-1.74	-2.45	*	120.82	103.45	90.34	104.73	9.16	69.66	59.01	68.77	65.74	3.87	-1.59	-1.33	-1.89	*	23.5632	-0.95	0	0	0	0
AT5G11460	AT5G11460_at		chr5:3656811-3658931 REVERSE LENGTH=1439	Protein of unknown function (DUF581)	29.71	33.44	35.96	33.06	2.62	21.08	19.93	19.55	20.13	1.7	-1.64	-1.36	-1.99	*	24.34	24.64	25.54	24.84	1.26	17.7	17.35	23.59	19.47	2.44	-1.28	-1.04	-1.63	0	23.5294	-1.13	0	0	0	0
AT1G14620	AT1G14620_at	DECOY	chr1:5014753-5016604 REVERSE LENGTH=1000	decoy	390.02	386.65	290.39	355.49	33.48	160.8	194.75	173.11	176.34	11.28	-2.02	-1.66	-2.42	*	478.06	341.12	336.23	385.19	46.31	271.4	228.82	206.44	235.57	19.29	-1.64	-1.27	-2.06	*	23.494	0.83	0	0	0	0
AT1G27950	AT1G27950_at	LTPG1	chr1:9740704-9742159 FORWARD LENGTH=786	glycosylphosphatidylinositol-anchored lipid protein transfer 1	685.93	538.51	566.39	597.64	45.44	275.49	242.61	291.9	269.39	16.5	-2.22	-1.88	-2.6	*	710.86	562.89	749.92	673.82	57.97	428.43	313.6	399.72	380.23	34.72	-1.77	-1.44	-2.19	*	23.4043	0.93	0	0	0	0
AT1G09660	AT1G09660_at		chr1:3127771-3131094 REVERSE LENGTH=1387	RNA-binding KH domain-containing protein	264.83	257.84	268.09	263.86	6.09	192.55	191.58	211.05	198.57	7.42	-1.33	-1.24	-1.43	*	263.03	187.76	200.11	217.16	23.29	167.23	183.11	203.22	184.37	11.12	-1.18	-0.95	-1.43	0	23.3871	-1.03	0	0	0	0
AT5G61030	AT5G61030_at	GR-RBP3	chr5:24560451-24562306 FORWARD LENGTH=1147	glycine-rich RNA-binding protein 3	125.12	139.38	118.71	127.25	7.13	42.47	38.24	36.08	38.75	2.66	-3.28	-2.84	-3.81	*	155.72	98.99	112.22	122.07	17.17	43.04	44.6	39.56	42.21	2.7	-2.89	-2.18	-3.66	*	23.2394	-0.83	0	0	0	0
AT1G48460	AT1G48460_at		chr1:17911346-17913300 FORWARD LENGTH=1297	unknown protein; FUNCTIONS IN: molecular_function unknown; INVOLVED IN: biological_process unknown; LOCATED IN: chloroplast envelope; EXPRESSED IN: 21 plant structures; EXPRESSED DURING: 13 growth stages; BEST Arabidopsis thaliana protein match is: unknown protein (TAIR:AT5G63040.1); Has 60 Blast hits to 60 proteins in 14 species: Archae - 0; Bacteria - 0; Metazoa - 0; Fungi - 0; Plants - 60; Vir…	108.77	104.45	118.25	110.24	5.01	39.84	41.01	55.87	45.35	5.72	-2.43	-1.98	-3.1	*	76.2	69.17	91.39	78.66	7.1	43.22	44.72	41.03	43.01	2.67	-1.83	-1.52	-2.18	*	23.2323	-1.2	0	0	0	0
AT3G16080	AT3G16080_at		chr3:5454818-5455927 FORWARD LENGTH=612	Zinc-binding ribosomal protein family protein	836.97	850.16	803.13	830.01	18.98	373.08	422.99	365.03	387.17	22.86	-2.14	-1.94	-2.39	*	683.93	530.15	583.54	599.76	45.11	351.9	320.15	368.42	345.72	16.32	-1.73	-1.49	-2	*	23.1959	-1.22	*	0	0	0
AT2G21860	AT2G21860_at		chr2:9318258-9320002 REVERSE LENGTH=1656	violaxanthin de-epoxidase-related	63.88	60.37	68.08	63.71	3.52	39.43	37.52	41.93	39.58	3.16	-1.61	-1.38	-1.9	*	36.85	50.23	56.11	47.72	6.04	34.55	34.81	36.05	35.16	1.78	-1.36	-1.06	-1.67	0	23.1884	-1.08	0	0	0	0
AT1G67620	AT1G67620_at		chr1:25340575-25342082 FORWARD LENGTH=877	Lojap-related protein	186.59	188.9	198.15	191.69	6.16	102.91	99.8	89.33	97.29	5.55	-1.97	-1.77	-2.2	*	167.77	154.66	125.06	149.23	12.93	97.15	96.37	75.52	89.65	7.58	-1.66	-1.36	-2.03	*	23.1638	-1.11	0	0	0	0
AT3G18740	AT3G18740_at		chr3:6453368-6454018 FORWARD LENGTH=556	Ribosomal protein L7Ae/L30e/S12e/Gadd45 family protein	339.93	349.99	431.32	371.99	31.61	203.1	208.2	275.97	228.93	25.27	-1.62	-1.3	-2.06	*	292.69	186.6	299.93	259.42	36.97	186.7	146.53	228.48	187.13	24.62	-1.39	-1	-1.91	0	23.0769	-1.11	0	0	0	0
AT2G02810	AT2G02810_at	ATUTR1, UTR1	chr2:801530-803436 FORWARD LENGTH=1259	UDP-galactose transporter 1	474.76	746.91	458.35	560.29	96.42	204.59	283.95	180.45	223.53	32.26	-2.51	-1.69	-3.62	*	459.43	653.94	398.24	504.1	78.5	236.72	351.42	199.34	262.13	47.36	-1.92	-1.3	-2.92	*	23.0769	-0.74	0	0	0	0
AT5G50370	AT5G50370_at		chr5:20509159-20510703 REVERSE LENGTH=1042	Adenylate kinase family protein	42.16	41.9	39.41	41.15	2.11	28.99	19.58	29.66	26.06	3.59	-1.58	-1.26	-2.07	*	45.13	34.89	31.91	37.29	4.12	32.15	30.07	30.71	31	1.5	-1.2	-0.97	-1.45	0	23.0159	-0.91	0	0	0	0
AT3G21110	AT3G21110_at	PUR7, PURC, ATPURC	chr3:7402481-7405641 REVERSE LENGTH=1710	purin 7	134.87	137.4	131.27	134.57	4.22	50.99	57.55	49.72	52.58	3.86	-2.56	-2.26	-2.94	*	143.66	101.66	106.46	117.22	13.35	61.25	50.79	37.18	49.93	7.28	-2.35	-1.74	-3.24	*	23.0088	-0.96	0	0	0	0
AT3G55010	AT3G55010_at	ATPURM, PUR5	chr3:20386619-20388806 FORWARD LENGTH=1501	phosphoribosylformylglycinamidine cyclo-ligase, chloroplast / phosphoribosyl-aminoimidazole synthetase / AIR synthase (PUR5)	153.37	152.86	147.83	151.41	4.5	65.95	57.66	50.43	57.76	5.25	-2.62	-2.26	-3.1	*	134.85	91.97	89.2	105.35	14.8	48.78	46.3	41.71	45.68	3.02	-2.31	-1.74	-2.93	*	23.0088	-1.16	0	0	0	0
AT1G22840	AT1G22840_at	CYTC-1, ATCYTC-A	chr1:8079287-8080574 FORWARD LENGTH=730	CYTOCHROME C-1	341.79	408.36	374.52	373.81	21.76	231.6	239.76	263.11	244.27	11.27	-1.53	-1.35	-1.73	*	271.24	250.83	298.46	272.86	14.79	204.56	210.14	260.91	225.21	18.46	-1.21	-1.04	-1.43	0	22.963	-1.2	*	1.59	0	0
AT2G09990	AT2G09990_at		chr2:3781328-3782049 FORWARD LENGTH=722	Ribosomal protein S5 domain 2-like superfamily protein	89.99	49.93	95.81	78.58	14.39	30.45	38.93	49.25	39.57	5.63	-1.99	-1.31	-2.89	*	51.24	48.21	66.92	55.02	6.3	26.58	42.26	48.54	38.93	7	-1.41	-1.01	-2.09	0	22.9008	-0.96	0	1.75	0	0
AT4G21100	AT4G21100_at	DDB1B	chr4:11258761-11265463 REVERSE LENGTH=3576	damaged DNA binding protein 1B	99.91	87.88	75.02	88.05	7.91	63.66	58.43	57.64	59.54	3.52	-1.48	-1.23	-1.76	*	88.66	90.56	75.82	84.93	5.51	80.79	75.96	80.02	78.67	2.75	-1.08	-0.95	-1.21	0	22.7642	-0.86	0	0	0	0
AT3G52380	AT3G52380_at	CP33, PDE322	chr3:19421397-19423097 FORWARD LENGTH=1454	chloroplast RNA-binding protein 33	313.33	229.68	326.78	289.93	30.44	134.64	156.7	124.28	138.56	11.28	-2.09	-1.67	-2.59	*	190.74	268.92	305.11	254.75	34.49	161.49	142.08	150.7	151.57	6.86	-1.68	-1.29	-2.09	*	22.7545	-0.86	0	1.97	0	0
AT2G45790	AT2G45790_at	ATPMM, PMM	chr2:18855775-18858018 FORWARD LENGTH=1107	phosphomannomutase	309.64	353.22	314.59	325.58	15.16	171.18	165.47	170.51	169.19	3.9	-1.92	-1.76	-2.09	*	242.18	318.63	301.99	287.45	23.91	177.11	161.63	193.87	177.69	9.77	-1.62	-1.36	-1.9	*	22.7273	-0.97	0	2.078	0	0
AT2G36290	AT2G36290_at		chr2:15208627-15210845 REVERSE LENGTH=1412	alpha/beta-Hydrolases superfamily protein	140.35	157.2	148.73	148.65	7.44	84.91	87.82	90.81	87.97	4.42	-1.69	-1.5	-1.9	*	131.82	101.85	118.5	117.13	9.2	89.35	80.41	89.66	86.05	4.31	-1.36	-1.16	-1.58	0	22.6667	-1.09	0	0	0	1.699
AT3G02910	AT3G02910_at		chr3:649814-650921 FORWARD LENGTH=1108	AIG2-like (avirulence induced gene) family protein	1080.4	1254.46	937.09	1090.08	99.35	455.63	501.18	320.21	425.31	55.79	-2.56	-1.99	-3.39	*	1010.74	710.04	752.58	824.18	93.92	445.28	456.15	381.86	426	26.49	-1.93	-1.54	-2.37	*	22.6131	-1.04	0	0	0	0
AT1G18080	AT1G18080_at	ATARCA, RACK1A_AT, RACK1A	chr1:6222201-6224151 FORWARD LENGTH=1358	Transducin/WD40 repeat-like superfamily protein	705.72	767.62	709.57	728.04	24.03	291.42	336.83	319.6	316.83	16.61	-2.3	-2.08	-2.55	*	610.15	511.06	620.66	580.05	35.97	340.81	292.07	311.09	314.72	15.87	-1.84	-1.61	-2.1	*	22.5962	-1.12	0	0	0	0
AT2G34050	AT2G34050_at		chr2:14382683-14384279 REVERSE LENGTH=988	INVOLVED IN: protein complex assembly; LOCATED IN: mitochondrion, chloroplast; EXPRESSED IN: 19 plant structures; EXPRESSED DURING: 9 growth stages; CONTAINS InterPro DOMAIN/s: ATP11 (InterPro:IPR010591); Has 304 Blast hits to 304 proteins in 167 species: Archae - 0; Bacteria - 0; Metazoa - 101; Fungi - 112; Plants - 39; Viruses - 0; Other Eukaryotes - 52 (source: NCBI BLink).	200.51	211.2	210.53	207.13	5.86	75.86	82.89	107.63	88.61	10.25	-2.34	-1.95	-2.9	*	162.57	134.57	147.27	147.92	8.31	74.61	76.93	96.84	82.61	7.64	-1.79	-1.51	-2.16	*	22.5641	-1.27	*	0	0	0
AT1G53500	AT1G53500_at	MUM4, RHM2, ATRHM2, ATMUM4	chr1:19966944-19969757 REVERSE LENGTH=2526	NAD-dependent epimerase/dehydratase family protein	159.04	168.68	98.24	141.75	22.88	76.61	77.15	55.34	69.88	8.33	-2.03	-1.42	-2.8	*	204.21	172.79	155.42	177.36	14.64	144.41	140.74	110.14	131.98	11.63	-1.34	-1.1	-1.64	0	22.5352	0.95	0	0	0	0
AT3G07110	AT3G07110_at		chr3:2252019-2253528 FORWARD LENGTH=890	Ribosomal protein L13 family protein	874.62	885.81	894.18	884.76	19.57	420.81	452.41	378.96	417.53	25.33	-2.12	-1.91	-2.37	*	783.44	704.74	650.09	713.16	41.31	421.91	445.54	417.96	426.85	18.59	-1.67	-1.48	-1.88	*	22.5131	-1.12	0	0	0	0
AT2G37690	AT2G37690_at		chr2:15805715-15810552 FORWARD LENGTH=2406	phosphoribosylaminoimidazole carboxylase, putative / AIR carboxylase, putative	175.17	170.82	144.52	163.61	10.4	74.64	51.62	54.91	59.68	8.13	-2.74	-2.18	-3.6	*	170.58	130.7	114.85	138.86	16.79	74.32	60.69	50.59	61.82	7.22	-2.25	-1.69	-2.97	*	22.4771	-0.95	0	4.731	0	0
AT2G46170	AT2G46170_at		chr2:18965313-18966603 FORWARD LENGTH=778	Reticulon family protein	179.17	207.72	228.33	205.32	15.18	56.54	62.3	72.14	63.93	5.41	-3.21	-2.67	-3.88	*	143.5	161.79	157.86	154.16	6.9	56.77	73.7	61.44	63.91	5.49	-2.41	-2.07	-2.85	*	22.4719	-1.15	0	1.611	0	0
AT3G14390	AT3G14390_at		chr3:4806725-4809433 FORWARD LENGTH=1980	Pyridoxal-dependent decarboxylase family protein	175.71	135.15	139.65	150.27	13.23	58.27	66.67	58.98	61.37	6.51	-2.45	-1.96	-3.09	*	150.43	109.54	109.11	122.66	14.02	67.05	57.11	67.07	63.75	4.78	-1.92	-1.52	-2.39	*	22.449	-0.97	0	0	0	0
AT5G10360	AT5G10360_at	EMB3010	chr5:3258474-3260234 REVERSE LENGTH=946	Ribosomal protein S6e	495.21	515.3	480.69	497.53	16.7	295.45	306.7	277.98	292.96	12.03	-1.7	-1.56	-1.85	*	441.08	388.95	385.68	406.15	19.78	293.18	302.33	312.61	303.13	10.78	-1.34	-1.21	-1.48	*	22.4359	-1.11	0	1.77	0	0
AT2G41840	AT2G41840_at		chr2:17459788-17461539 REVERSE LENGTH=1227	Ribosomal protein S5 family protein	884.25	1036.15	980.2	963.08	56.98	602.68	673.45	628.4	635.54	26.98	-1.52	-1.34	-1.7	*	806.29	895.34	806.28	836.52	34.44	675.12	693.66	786.87	719	40.31	-1.16	-1.04	-1.31	0	22.3881	-1.02	0	0	0	0
AT1G32860	AT1G32860_at		chr1:11907109-11908928 REVERSE LENGTH=1605	Glycosyl hydrolase superfamily protein	148.53	190.49	141.87	160.21	16.01	60.69	71.16	80.77	70.95	6.72	-2.26	-1.79	-2.84	*	173.68	130.22	129.2	144.24	14.84	95.4	81.34	70.95	82.46	7.5	-1.75	-1.39	-2.19	*	22.3464	-0.88	0	0	0	0
AT2G44660	AT2G44660_at		chr2:18420832-18422839 REVERSE LENGTH=1533	ALG6, ALG8 glycosyltransferase family	189.92	175.49	201.51	188.78	8.64	83.63	103.87	75.87	87.9	9.54	-2.15	-1.79	-2.65	*	114.77	144.84	119.65	126.28	10.57	86.18	72.71	59.33	72.64	8.24	-1.74	-1.39	-2.22	*	22.3464	-1.29	*	0	0	0
AT1G22490	AT1G22490_at		chr1:7938251-7940592 REVERSE LENGTH=1215	basic helix-loop-helix (bHLH) DNA-binding superfamily protein	58.77	66.63	65.4	63.82	3.54	35.43	47.32	36.64	39.75	4.92	-1.61	-1.3	-2.05	*	29.31	34.93	35.67	33.19	2.91	22.82	30.01	25.99	26.23	2.9	-1.27	-1.01	-1.61	0	22.3077	-1.63	*	0	0	0
AT1G27930	AT1G27930_at		chr1:9731260-9732719 REVERSE LENGTH=1460	Protein of unknown function (DUF579)	154.46	142.06	149.71	149.24	4.38	71.19	96.29	100.75	89.31	9.96	-1.67	-1.4	-2.06	*	91.12	113.19	116.71	106.83	8.58	64.13	82.47	91.33	79.27	8.41	-1.35	-1.09	-1.69	0	22.1429	-1.22	*	0	0	0
AT1G16280	AT1G16280_at	RH36, AtRH36, SWA3	chr1:5568482-5570487 REVERSE LENGTH=1476	RNA helicase 36	63.62	67.62	41.84	57.78	8.27	34.31	35.36	28.45	32.67	3.04	-1.77	-1.31	-2.32	*	45.58	61.73	57.32	54.81	5.36	36.98	51.08	36.97	41.72	5.12	-1.31	-1.02	-1.72	0	22.1374	-0.78	0	0	0	0
AT2G30060	AT2G30060_at		chr2:12826915-12828919 FORWARD LENGTH=1142	Pleckstrin homology (PH) domain superfamily protein	102.54	133.17	113.14	116.01	10.37	79.11	81.03	79.98	80.13	3.1	-1.45	-1.22	-1.69	*	74.31	75.12	91.76	79.77	6.32	54.72	66.72	80.52	67.22	7.81	-1.19	-0.95	-1.52	0	22.1311	-1.19	0	0	0	0
AT5G15200	AT5G15200_at		chr5:4934883-4936408 REVERSE LENGTH=912	Ribosomal protein S4	467.01	370.42	470.49	435.62	34.06	256.56	211.98	250.76	237.9	16.34	-1.83	-1.54	-2.17	*	346.55	266.99	389.41	333.69	36.69	199.79	158.31	263.86	207	31.01	-1.61	-1.2	-2.24	0	22.0779	-1.05	0	0	0	0
AT2G21580	AT2G21580_at		chr2:9236523-9237746 FORWARD LENGTH=669	Ribosomal protein S25 family protein	356.99	348.39	424.56	376.57	26.65	182.45	207.8	249.6	212.72	21.64	-1.77	-1.45	-2.19	*	292.7	268.21	289.24	281.27	13.39	191.26	175.5	249.12	205.9	23.55	-1.37	-1.13	-1.7	0	22.069	-1.16	0	1.905	0	0
AT2G19640	AT2G19640_at	ASHR2	chr2:8491388-8492920 FORWARD LENGTH=1533	ASH1-related protein 2	175.25	228.62	184.48	195.79	17.59	80.85	87.64	91.48	86.87	5.74	-2.25	-1.86	-2.7	*	151.52	105.05	124.63	127.29	13.85	70.53	63.6	76.53	70.08	4.84	-1.82	-1.45	-2.23	*	22.043	-1.22	*	0	0	0
AT5G41010	AT5G41010_at	NRPB12, NRPD12, NRPE12	chr5:16424050-16424952 FORWARD LENGTH=187	DNA directed RNA polymerase, 7 kDa subunit	331.84	306.32	348.69	330.87	14.49	187.16	158.98	180.03	174.6	10.4	-1.9	-1.68	-2.15	*	244.87	182.39	218.96	215.29	18.9	126.52	111.55	156.58	131.33	14.04	-1.64	-1.31	-2.07	*	22.0238	-1.32	*	0	0	0
AT2G37860	AT2G37860_at	LCD1	chr2:15856630-15858920 FORWARD LENGTH=1842	Protein of unknown function (DUF3411)	112.41	114.91	123.71	116.81	4.43	40.01	39.22	33.07	37.29	2.98	-3.13	-2.73	-3.65	*	124.64	109.76	94.48	109.99	9.13	51.04	35.69	31.48	39.48	6.1	-2.79	-2.13	-3.83	*	21.978	-0.92	0	0	0	0
AT1G55210	AT1G55210_at		chr1:20597790-20598675 REVERSE LENGTH=814	Disease resistance-responsive (dirigent-like protein) family protein	30.01	42.56	30.71	34.54	5.01	21.15	20.26	13.51	18.02	3.24	-1.92	-1.32	-2.89	*	18.73	23.32	21.37	21.1	2.16	9.89	16.51	17.21	14.44	2.96	-1.46	-1.03	-2.26	0	21.9697	-1.2	0	0	0	0
AT3G11010	AT3G11010_at	AtRLP34, RLP34	chr3:3450496-3453683 REVERSE LENGTH=2952	receptor like protein 34	119.18	158.01	68.13	113.87	27.97	24.19	47.23	15.64	29.08	11.26	-3.92	-1.92	-11.25	*	243.98	512.1	223.37	326.61	93.54	47.35	183.04	33.38	87.24	49.1	-3.74	-1.5	-50.79	*	21.875	1.4	*	0	0	0
AT3G57560	AT3G57560_at	NAGK	chr3:21310825-21312312 REVERSE LENGTH=1488	N-acetyl-l-glutamate kinase	143.48	146.29	121.02	137.11	8.46	68.03	86	64.29	72.68	7.53	-1.89	-1.56	-2.33	*	93.42	75.64	79.73	82.74	5.7	64.43	54.28	55.27	58.22	3.47	-1.42	-1.22	-1.65	*	21.7949	-1.42	*	0	0	0
AT4G15000	AT4G15000_at		chr4:8571833-8572489 FORWARD LENGTH=561	Ribosomal L27e protein family	290.28	311.35	278.09	293.78	11.72	146.02	158.61	126.4	144.05	10.31	-2.04	-1.79	-2.35	*	215.76	179.16	240.45	211.73	18	108.14	105.48	147.12	120.36	13.82	-1.76	-1.4	-2.25	*	21.7877	-1.2	0	0	0	0
AT4G15770	AT4G15770_at		chr4:8978006-8978876 FORWARD LENGTH=871	RNA binding	219.64	186.78	241.66	216.49	16.44	168.01	140.13	127.02	144.84	12.48	-1.49	-1.24	-1.81	*	213.73	136.24	162.17	170.68	22.69	135.82	119.88	149.46	134.5	9.01	-1.27	-0.97	-1.6	0	21.7742	-1	0	2.111	0	0
AT4G02790	AT4G02790_at		chr4:1247386-1249588 FORWARD LENGTH=1386	GTP-binding family protein	111.17	84.45	91.09	95.57	8.41	44.94	44.73	47.77	45.84	3.93	-2.08	-1.7	-2.55	*	73.77	82.48	103.85	86.63	9.43	60.1	45.31	46.32	50.71	5.15	-1.71	-1.33	-2.18	*	21.7647	-0.88	0	0	0	0
AT1G72920	AT1G72920_at		chr1:27437928-27439091 FORWARD LENGTH=1070	Toll-Interleukin-Resistance (TIR) domain family protein	96.58	109.08	87.28	97.64	7.39	12.5	19.48	17.67	16.37	2.76	-5.97	-4.51	-8.41	*	84.1	208.91	193.26	162.05	39.68	30.72	28.52	20.48	26.52	3.61	-6.11	-3.53	-9.34	*	21.7295	0.98	0	0	0	0
AT4G25890	AT4G25890_at		chr4:13159484-13160495 REVERSE LENGTH=605	60S acidic ribosomal protein family	231.78	206.06	251.74	230.04	13.59	59.47	78.08	102.83	80.12	13.28	-2.87	-2.21	-4	*	155.13	124.06	152.09	143.77	10.35	50.27	55.61	83.69	62.98	10.72	-2.28	-1.73	-3.23	*	21.7195	-1.37	*	2.198	0	0
AT5G48760	AT5G48760_at		chr5:19771138-19772722 REVERSE LENGTH=834	Ribosomal protein L13 family protein	373.27	358.39	458.56	396.82	31.88	211.5	167.67	171.68	183.03	14.61	-2.17	-1.8	-2.62	*	241.14	236.48	275.65	250.2	13.62	151.33	150.4	170.35	156.7	8.12	-1.6	-1.41	-1.81	*	21.6667	-1.34	*	0	0	0
AT1G79550	AT1G79550_at	PGK	chr1:29924023-29926442 REVERSE LENGTH=1677	phosphoglycerate kinase	443.15	373.88	452.87	423.23	25.23	178.75	167.5	176.7	174.12	5.6	-2.43	-2.17	-2.71	*	349.31	357.91	382.57	363.28	12.65	208.46	160.83	189.13	187.02	14.08	-1.94	-1.7	-2.24	*	21.659	-1.04	0	2.234	0	0
AT2G19750	AT2G19750_at		chr2:8514954-8516138 FORWARD LENGTH=604	Ribosomal protein S30 family protein	880.08	717.99	799.41	799.47	47.59	361.98	382.84	488.45	411.28	41.06	-1.94	-1.62	-2.38	*	928.07	656.76	641.94	742.31	93.03	489.41	342.17	489.32	439.01	50.23	-1.69	-1.27	-2.24	*	21.6049	-0.87	0	2.419	0	0
AT5G59540	AT5G59540_at		chr5:23996073-23997590 REVERSE LENGTH=1414	2-oxoglutarate (2OG) and Fe(II)-dependent oxygenase superfamily protein	454.93	417.6	361.15	412.44	30.21	175.17	228.62	135.26	179.67	28.32	-2.3	-1.76	-3.16	*	528.92	671.66	533.41	577.09	52.93	381.42	350.1	247.37	325.19	41.86	-1.77	-1.38	-2.34	*	21.5909	1.15	0	0	0	0
AT5G23300	AT5G23300_at	PYRD	chr5:7847587-7850404 REVERSE LENGTH=1749	pyrimidine d	126.72	125.75	134.69	128.81	4.17	50.46	45.14	44.33	46.51	3.12	-2.77	-2.46	-3.15	*	122.87	105.43	108.96	112.46	5.75	54.91	51.78	45.01	50.74	3.58	-2.22	-1.93	-2.57	*	21.5447	-1.04	0	0	0	0
AT5G07340	AT5G07340_at		chr5:2317213-2319649 FORWARD LENGTH=1877	Calreticulin family protein	46.63	62.71	62.25	57.11	6.19	34.34	32.16	26	31.02	3.13	-1.84	-1.44	-2.35	*	62.85	71.77	67.03	67.17	3.47	50.31	48.44	57.02	51.81	3.47	-1.3	-1.13	-1.49	0	21.5278	0.98	0	2.345	0	0
AT5G16060	AT5G16060_at		chr5:5246120-5247431 FORWARD LENGTH=551	Cytochrome c oxidase biogenesis protein Cmc1-like	549.76	509.05	541.11	533.81	14.24	358.33	375.41	377.61	371	9.97	-1.44	-1.35	-1.53	*	507.9	397.26	457.21	453.38	32.73	391.11	324.35	379.78	364.67	21.66	-1.24	-1.06	-1.45	0	21.4815	-1.04	0	0	0	0
AT3G27740	AT3G27740_at	CARA	chr3:10281261-10283866 REVERSE LENGTH=1576	carbamoyl phosphate synthetase A	502.35	498.06	470.67	491.1	15.49	269.96	294.57	259.49	274.53	12.62	-1.79	-1.63	-1.96	*	587.45	483	429.82	499.8	46.79	345.86	332.69	275.36	318.46	22.83	-1.57	-1.28	-1.9	*	21.4724	0.85	0	0	0	0
AT3G21560	AT3G21560_at	UGT84A2	chr3:7595806-7597577 FORWARD LENGTH=1772	UDP-Glycosyltransferase superfamily protein	126.64	170.24	97.71	131.21	21.94	22.23	25.25	29.27	25.66	3.15	-5.11	-3.54	-7.13	*	185.46	86.17	97.48	123.07	31.29	27.22	24.95	24.62	25.46	2.06	-4.83	-2.78	-7.07	*	21.4689	-0.66	0	0	0	0
AT4G08240	AT4G08240_at		chr4:5194671-5195925 FORWARD LENGTH=622	unknown protein; Has 30201 Blast hits to 17322 proteins in 780 species: Archae - 12; Bacteria - 1396; Metazoa - 17338; Fungi - 3422; Plants - 5037; Viruses - 0; Other Eukaryotes - 2996 (source: NCBI BLink).	146.13	147.28	143.58	145.86	4.48	85.68	87.61	89.94	87.65	3.3	-1.66	-1.54	-1.8	*	118.12	122.38	139.4	126.01	7.58	100.61	81.55	86.71	89.56	6.03	-1.41	-1.21	-1.64	*	21.4286	-1.04	0	0	0	0
AT2G18510	AT2G18510_at	emb2444	chr2:8031182-8033619 REVERSE LENGTH=1566	RNA-binding (RRM/RBD/RNP motifs) family protein	652.8	609.98	436.32	566.1	66.96	246.7	272.47	284.3	267.67	12.94	-2.11	-1.68	-2.57	*	720.15	621.56	568.37	635.86	45.11	441.94	395.15	418.23	419.53	14.39	-1.52	-1.32	-1.72	*	21.4286	0.9	0	0	0	0
AT5G61170	AT5G61170_at		chr5:24611086-24612427 FORWARD LENGTH=729	Ribosomal protein S19e family protein	326.84	293.56	356.75	326.01	19.06	162.19	132.76	128.13	141.22	11.92	-2.31	-1.96	-2.75	*	278.26	199.09	215.9	230.93	24.43	117.23	99.64	137.75	117.88	11.65	-1.96	-1.54	-2.49	*	21.4286	-1.17	0	0	0	0
AT4G34490	AT4G34490_at	ATCAP1, CAP 1, CAP1	chr4:16484530-16487417 REVERSE LENGTH=1859	cyclase associated protein 1	209.94	179.87	244.12	211.45	18.8	119.51	113	88.47	107.24	10.11	-1.97	-1.59	-2.45	*	143.81	194.4	183.72	173.75	16.34	114.98	122.4	110.06	115.8	5.38	-1.5	-1.25	-1.77	*	21.3836	-0.98	0	0	0	0
AT2G20690	AT2G20690_at		chr2:8923305-8924974 FORWARD LENGTH=1206	lumazine-binding family protein	144.55	128.66	154.17	142.85	7.97	70.26	84.42	64.46	73.08	6.92	-1.95	-1.64	-2.36	*	102.45	120.01	135.51	119.35	10.6	85.36	75.86	69.99	76.72	5.03	-1.56	-1.29	-1.86	*	21.3415	-1.01	0	0	0	0
AT3G60360	AT3G60360_at	EDA14, UTP11	chr3:22312258-22314400 REVERSE LENGTH=1098	embryo sac development arrest 14	71.54	68.69	76.9	72.7	3.33	45.6	42.61	39.97	42.71	2.75	-1.7	-1.5	-1.94	*	56.46	52.07	51.69	53.37	2.37	43.51	37.96	38.35	39.88	2.44	-1.34	-1.18	-1.52	0	21.3333	-1.23	*	0	0	0
AT3G18190	AT3G18190_at		chr3:6232126-6234060 FORWARD LENGTH=1935	TCP-1/cpn60 chaperonin family protein	101.48	97.8	85.2	94.75	5.5	52.72	56.64	63.51	57.82	4.05	-1.64	-1.41	-1.91	*	104.83	73.84	90.93	89.97	9.07	66.32	64.7	69.65	66.59	2.95	-1.35	-1.11	-1.6	0	21.2766	-0.88	0	0	0	0
AT1G77940	AT1G77940_at		chr1:29303897-29305382 REVERSE LENGTH=652	Ribosomal protein L7Ae/L30e/S12e/Gadd45 family protein	840.3	884.43	830.44	852.32	31.33	412.21	468.95	398.38	426.25	24.65	-2	-1.79	-2.24	*	1031.41	682.08	789.94	834.29	103.27	537.71	390.54	419.13	449.21	45.14	-1.86	-1.41	-2.41	*	21.2291	-0.84	0	0	0	0
AT5G45590	AT5G45590_at		chr5:18484450-18486284 REVERSE LENGTH=772	Ribosomal protein L35	124.7	117.54	98.52	113.81	8.24	50.79	45.92	44.64	46.92	2.71	-2.43	-2.08	-2.82	*	130.83	118.01	110.92	120.17	6.19	69.01	65.52	52.74	62.52	5.38	-1.92	-1.64	-2.28	*	21.1538	0.91	0	0	0	0
AT4G27657	AT4G27657_at		chr4:13813044-13813516 FORWARD LENGTH=473	unknown protein; FUNCTIONS IN: molecular_function unknown; INVOLVED IN: biological_process unknown; LOCATED IN: endomembrane system; EXPRESSED IN: 15 plant structures; EXPRESSED DURING: 9 growth stages; BEST Arabidopsis thaliana protein match is: unknown protein (TAIR:AT5G54145.1); Has 30201 Blast hits to 17322 proteins in 780 species: Archae - 12; Bacteria - 1396; Metazoa - 17338; Fungi - 3422; …	40.7	40.54	35.86	38.92	2.58	18.2	19.29	22.78	20.04	2.5	-1.94	-1.56	-2.5	*	23.34	63.44	43.29	43.29	12.1	14.31	20.25	20.89	18.39	2.62	-2.35	-1.23	-3.75	*	21.1538	0.6	0	0	0	0
AT3G25120	AT3G25120_at		chr3:9149544-9151123 REVERSE LENGTH=866	Mitochondrial import inner membrane translocase subunit Tim17/Tim22/Tim23 family protein	464.78	526.56	537.46	508.9	26.16	318.28	392.36	324.43	344.77	25.55	-1.48	-1.28	-1.72	*	331.57	434.96	422.19	395.66	34.66	292.59	336.39	353.45	327.05	20.41	-1.21	-1.01	-1.44	0	21.0938	-1.09	0	0	0	0
AT5G58420	AT5G58420_at		chr5:23619506-23621094 FORWARD LENGTH=1080	Ribosomal protein S4 (RPS4A) family protein	321.36	286.04	313.25	306.52	17.33	170.85	156.38	199.26	175.73	14.72	-1.74	-1.48	-2.07	*	283.22	191.84	274.79	249.48	29.79	159.68	120.47	193.93	158.35	21.98	-1.58	-1.17	-2.16	0	20.9459	-1	0	0	0	0
AT3G09820	AT3G09820_at	ADK1	chr3:3012094-3014944 FORWARD LENGTH=1674	adenosine kinase 1	618.39	628.25	643.33	630.42	21.28	221.17	200.19	165.22	195.85	17.54	-3.22	-2.77	-3.81	*	560.65	464.08	457.26	492.64	36.21	210.28	173.69	188.57	191.45	11.74	-2.57	-2.19	-3.01	*	20.9386	-1.13	0	0	0	0
AT1G16350	AT1G16350_at		chr1:5590951-5593007 FORWARD LENGTH=1644	Aldolase-type TIM barrel family protein	314.53	257.46	235.47	269.93	24.24	99.37	118.4	106.06	107.52	7.64	-2.51	-2.07	-3.02	*	378.72	348.89	325.16	350.58	17.5	205.52	188.83	159.65	184.75	14.22	-1.9	-1.64	-2.22	*	20.7729	1.1	0	0	0	0
AT3G09500	AT3G09500_at		chr3:2916952-2918108 FORWARD LENGTH=680	Ribosomal L29 family protein	1811.12	1837.21	1559.11	1732.48	95.37	984.76	1228.61	1130.82	1113.51	75.88	-1.56	-1.35	-1.8	*	1755.04	1252.21	1537.67	1512.37	145.93	1281.84	951.45	1184.66	1140.65	96.75	-1.33	-1.07	-1.64	0	20.7407	-0.96	0	0	0	0
AT4G00100	AT4G00100_at	ATRPS13A, RPS13, PFL2, RPS13A	chr4:37084-38312 FORWARD LENGTH=733	ribosomal protein S13A	692.61	626.41	586.29	636.04	33.61	313.98	374.93	377.64	357.49	24.56	-1.78	-1.55	-2.06	*	630.09	517.23	546.36	565.42	34.29	422.56	338.75	423.06	394.75	28.23	-1.43	-1.23	-1.68	*	20.6452	-0.99	0	2.241	0	0
AT5G65880	AT5G65880_at		chr5:26352995-26353761 FORWARD LENGTH=456	unknown protein; FUNCTIONS IN: molecular_function unknown; INVOLVED IN: biological_process unknown; LOCATED IN: endomembrane system; EXPRESSED IN: 21 plant structures; EXPRESSED DURING: 13 growth stages; Has 1807 Blast hits to 1807 proteins in 277 species: Archae - 0; Bacteria - 0; Metazoa - 736; Fungi - 347; Plants - 385; Viruses - 0; Other Eukaryotes - 339 (source: NCBI BLink).	103.65	117.31	104.91	108.5	5.29	41.26	44.58	56.05	46.35	5.96	-2.34	-1.9	-3	*	110.66	72.46	85.8	89.76	11.14	46.72	32.06	52.13	43.83	6.1	-2.05	-1.51	-2.82	*	20.5263	-0.99	0	0	0	0
AT5G40770	AT5G40770_at	ATPHB3, PHB3	chr5:16314850-16316719 REVERSE LENGTH=1589	prohibitin 3	293.49	248.23	283	275.12	14.21	127.11	114.52	133.74	125.19	6.55	-2.2	-1.95	-2.48	*	223.51	188.43	197.75	203.62	11.08	107.76	93.34	129.24	109.88	10.8	-1.85	-1.55	-2.25	*	20.5128	-1.19	0	0	0	0
AT5G48580	AT5G48580_at	FKBP15-2	chr5:19695929-19698712 REVERSE LENGTH=1179	FK506- and rapamycin-binding protein 15 kD-2	243.8	308.26	289.44	280.27	20.45	124.81	141	151.12	139.07	9	-2.02	-1.71	-2.36	*	212.52	206.73	207.37	208.22	4.95	151.2	121.82	138.97	137.08	9.02	-1.52	-1.36	-1.71	*	20.4678	-1.18	0	0	0	0
AT1G05170	AT1G05170_at		chr1:1491111-1494248 REVERSE LENGTH=1881	Galactosyltransferase family protein	63.25	68.48	55.45	62.52	4.82	30.48	29.32	23.99	28.26	3.52	-2.21	-1.76	-2.86	*	68.41	86.18	65.12	72.9	7.85	39.62	46.97	31.75	39.33	5.4	-1.85	-1.4	-2.51	*	20.4545	0.93	0	0	0	0
AT5G20160	AT5G20160_at		chr5:6803782-6805195 REVERSE LENGTH=869	Ribosomal protein L7Ae/L30e/S12e/Gadd45 family protein	250.53	279.51	254.67	260.66	11.62	117.12	123.29	139.94	126.84	8.16	-2.06	-1.81	-2.35	*	212.31	150.53	188.93	183.82	18.08	107.96	95.83	111.64	104.86	6	-1.75	-1.44	-2.1	*	20.442	-1.2	0	0	0	0
AT2G20390	AT2G20390_at		chr2:8796341-8798194 REVERSE LENGTH=846	unknown protein; FUNCTIONS IN: molecular_function unknown; INVOLVED IN: biological_process unknown; LOCATED IN: cellular_component unknown; EXPRESSED IN: 22 plant structures; EXPRESSED DURING: 13 growth stages.	180.23	210.34	135.4	175.27	22.34	89.72	124.53	106.32	107.24	11.87	-1.63	-1.23	-2.16	*	149.4	114.34	127	129.59	10.96	117.56	106.71	111.83	112.62	3.91	-1.15	-0.98	-1.33	0	20.3252	-1.03	0	0	0	0
AT5G67330	AT5G67330_at	ATNRAMP4, NRAMP4	chr5:26861727-26863897 FORWARD LENGTH=1951	natural resistance associated macrophage protein 4	206.21	181.74	134.37	174.91	21.55	40.16	49.49	55.94	48.95	6	-3.57	-2.67	-4.78	*	119.86	199.45	176.09	164.78	24.93	50.65	59.13	60.81	56.7	4.44	-2.91	-2.13	-3.78	*	20.2247	-0.77	0	0	0	0
AT5G19750	AT5G19750_at		chr5:6677069-6679384 FORWARD LENGTH=1179	Peroxisomal membrane 22 kDa (Mpv17/PMP22) family protein	439.88	524.72	471.64	476.62	28.53	86.39	126.18	88.48	100.12	14.21	-4.76	-3.76	-6.3	*	420.51	352.52	327.58	367.18	28.7	107.58	100.01	106.93	105.33	4.28	-3.49	-3	-4.01	*	20.2128	-1.11	0	0	0	0
AT3G06310	AT3G06310_at		chr3:1912805-1914408 REVERSE LENGTH=708	Cox19-like CHCH family protein	45.15	38.4	47.11	43.5	3.05	21.84	31.24	28.62	27.22	3.16	-1.6	-1.29	-2.03	*	30.7	34.65	31.36	32.03	1.78	28.5	22.55	28.35	26.19	2.4	-1.22	-1.03	-1.47	0	20.155	-1.17	0	0	0	0
AT4G11010	AT4G11010_at	NDPK3	chr4:6732580-6734361 REVERSE LENGTH=980	nucleoside diphosphate kinase 3	1090.8	1207.12	1077.95	1127.63	51.15	335.52	349.89	332.23	339.11	11.4	-3.33	-3.03	-3.64	*	1336.04	997.29	1114.63	1143.14	102.39	418.23	345.13	410.06	391.65	24.31	-2.92	-2.42	-3.48	*	20.132	0.85	0	1.744	2.057	0
AT4G36020	AT4G36020_at	CSDP1	chr4:17043112-17044396 REVERSE LENGTH=1285	cold shock domain protein 1	170.76	193.3	165.75	175.79	10.53	99.31	77.47	86.57	87.41	7.13	-2.01	-1.71	-2.39	*	152.87	122.6	113.28	129.51	12.78	70.24	84.73	71.68	75.95	6.61	-1.71	-1.37	-2.12	*	19.883	-1.13	0	3.153	0	0
AT3G08640	AT3G08640_at		chr3:2622880-2624308 FORWARD LENGTH=1429	Protein of unknown function (DUF3411)	221.06	292.43	225.29	246.03	24.16	136.31	139.14	126.88	134.35	5.52	-1.83	-1.52	-2.16	*	206.98	158.34	137.12	167.33	20.74	91.73	114.22	113.03	105.96	8.11	-1.58	-1.22	-1.99	*	19.7368	-1.14	0	0	0	0
AT1G49760	AT1G49760_at	PAB8, PABP8	chr1:18416480-18420047 FORWARD LENGTH=2570	poly(A) binding protein 8	413.08	384.89	424.45	408.29	15.17	290.14	227.82	225.59	247.67	21.88	-1.65	-1.42	-1.95	*	354.84	266.05	292.52	304.64	26.75	210.48	208.69	246.8	221.94	14.1	-1.37	-1.14	-1.63	0	19.7183	-1.15	0	0	0	0
AT3G05590	AT3G05590_at	RPL18	chr3:1621457-1623014 FORWARD LENGTH=857	ribosomal protein L18	603.91	496	509.16	538.67	37.02	193.54	324.93	273.59	264.97	40.22	-2.03	-1.58	-2.76	*	530.25	419.26	619.11	520.56	60.39	302.84	269.93	373.66	315.13	31.73	-1.65	-1.27	-2.12	*	19.6203	-0.84	0	0	0	0
AT4G36010	AT4G36010_at		chr4:17039063-17041131 REVERSE LENGTH=1287	Pathogenesis-related thaumatin superfamily protein	180.01	192.7	145.69	172.42	15.3	30.1	30.3	56.74	39.31	9.44	-4.39	-3.03	-7.37	*	224.41	133.7	89.94	149.41	39.55	30.4	39.1	32.78	33.94	3.61	-4.4	-2.44	-6.64	*	19.4719	-0.78	0	0	0	0
AT5G15550	AT5G15550_at		chr5:5058749-5062087 REVERSE LENGTH=1574	Transducin/WD40 repeat-like superfamily protein	118.29	136.58	121.79	125.3	6.72	70.5	59.85	61.41	63.9	4.55	-1.96	-1.7	-2.28	*	116.51	99.15	101.45	106.19	6.06	69.47	71.98	66.99	69.32	2.44	-1.53	-1.37	-1.71	*	19.4118	-1.04	0	0	0	0
AT5G67510	AT5G67510_at		chr5:26937813-26938451 REVERSE LENGTH=639	Translation protein SH3-like family protein	183.13	178.12	167.86	176.3	5.51	66.72	91.35	97.28	85.26	10.19	-2.07	-1.71	-2.59	*	154.4	130.95	103.7	129.7	14.88	80.88	69.52	75.55	75.15	3.98	-1.73	-1.38	-2.1	*	19.2982	-1.13	0	0	0	0
AT1G33040	AT1G33040_at	NACA5	chr1:11966470-11967843 FORWARD LENGTH=854	nascent polypeptide-associated complex subunit alpha-like protein 5	86.92	77.05	73.61	79.06	5.22	47.16	45.97	35.98	43.11	4.47	-1.83	-1.51	-2.27	*	157.58	119.97	129.57	135.86	11.5	110.67	73.49	72.29	85.35	12.65	-1.59	-1.22	-2.16	*	19.2053	1.43	*	0	0	0
AT1G34350	AT1G34350_at		chr1:12534426-12536095 FORWARD LENGTH=894	unknown protein; FUNCTIONS IN: molecular_function unknown; INVOLVED IN: biological_process unknown; LOCATED IN: cellular_component unknown; EXPRESSED IN: 23 plant structures; EXPRESSED DURING: 13 growth stages.	112.15	90.07	136.06	112.67	13.48	71.18	68.4	81.49	73.49	4.89	-1.53	-1.2	-1.9	*	67.41	62.45	101.39	76.92	12.46	61.34	44.97	62.09	56.02	5.78	-1.37	-0.97	-1.86	0	19.1667	-1.06	0	0	0	0
AT1G71780	AT1G71780_at		chr1:26995086-26996650 REVERSE LENGTH=926	unknown protein; FUNCTIONS IN: molecular_function unknown; INVOLVED IN: biological_process unknown; LOCATED IN: endoplasmic reticulum; EXPRESSED IN: 25 plant structures; EXPRESSED DURING: 15 growth stages; Has 34 Blast hits to 34 proteins in 11 species: Archae - 0; Bacteria - 0; Metazoa - 0; Fungi - 0; Plants - 34; Viruses - 0; Other Eukaryotes - 0 (source: NCBI BLink).	226.76	237.95	248.73	237.73	7.93	132.64	152.54	161.36	149.02	10.25	-1.6	-1.41	-1.82	*	186.87	185.75	157.15	176.57	10.29	135.98	143.75	136.51	138.45	4.04	-1.28	-1.14	-1.42	0	19.1489	-1.21	*	0	0	0
AT3G21250	AT3G21250_at	ATMRP6, MRP6, ABCC8	chr3:7457433-7463525 REVERSE LENGTH=4861	multidrug resistance-associated protein 6	99.45	109.08	69	92.6	12.67	18.9	22.37	16.42	19.45	3.91	-4.76	-3.24	-7.45	*	213.31	220.19	248.32	227.31	11.34	79.18	77.85	49.45	68.79	10.01	-3.3	-2.62	-4.39	*	19.1358	1.97	*	0	0	0
AT1G67360	AT1G67360_at		chr1:25236811-25238036 REVERSE LENGTH=1107	Rubber elongation factor protein (REF)	131.91	168.63	87.9	129.51	23.91	10.08	10.79	11.63	10.79	1.88	-12.01	-7.74	-18.43	*	227.56	119.08	116.22	154.18	36.5	12.39	15.79	15	14.56	1.88	-10.59	-6.26	-15.92	*	19.1214	0.68	0	0	0	0
AT2G27720	AT2G27720_at		chr2:11818491-11819578 FORWARD LENGTH=672	60S acidic ribosomal protein family	647.71	518.18	612.64	594.42	39.24	379.07	376.42	430.59	395.66	19.46	-1.5	-1.31	-1.72	*	498.29	559.71	452.73	503.95	35.52	428.3	377.24	431.46	413.58	18.9	-1.22	-1.06	-1.39	0	19.084	-1.01	0	0	0	0
AT1G79920	AT1G79920_at		chr1:30058632-30062722 REVERSE LENGTH=2942	Heat shock protein 70 (Hsp 70) family protein	563.69	593.17	587.54	579.58	14.03	299.51	230.07	249.69	260.16	22.38	-2.23	-1.94	-2.61	*	530.75	546.4	518.96	530.23	14.98	318.28	298.98	320.23	310.84	13.91	-1.71	-1.57	-1.86	*	19.0722	-1.03	0	0	0	0
AT1G28395	AT1G28395_at		chr1:9969321-9971681 REVERSE LENGTH=783	unknown protein; FUNCTIONS IN: molecular_function unknown; INVOLVED IN: biological_process unknown; LOCATED IN: chloroplast; EXPRESSED IN: 22 plant structures; EXPRESSED DURING: 13 growth stages; BEST Arabidopsis thaliana protein match is: unknown protein (TAIR:AT2G33847.1).	189.39	154.31	168.04	170.57	10.36	53.38	68.19	76.2	66	7.96	-2.58	-2.1	-3.28	*	141.16	101.23	121.1	121.31	11.54	59.39	51.92	64.35	58.29	4.26	-2.08	-1.7	-2.53	*	19.0476	-1.17	0	0	0	0
AT1G07740	AT1G07740_at		chr1:2397442-2400508 REVERSE LENGTH=2658	Tetratricopeptide repeat (TPR)-like superfamily protein	37.25	34.89	31.8	34.69	2.42	19.02	25.08	22.82	22.44	2.48	-1.55	-1.26	-1.94	*	30.98	30.82	37.22	32.86	2.6	29.49	25.21	24.49	26.72	2.06	-1.23	-1.02	-1.48	0	19.0476	-0.89	0	0	0	0
AT5G47060	AT5G47060_at		chr5:19116788-19118046 FORWARD LENGTH=996	Protein of unknown function (DUF581)	76.25	91.39	78.82	82.22	5.28	31.19	34.51	23.43	29.29	4.13	-2.81	-2.21	-3.72	*	81.5	79.29	68.71	76.55	4.61	37.64	39.46	28.51	35.09	3.82	-2.18	-1.79	-2.71	*	19.0045	-0.93	0	0	0	0
AT3G07390	AT3G07390_at	AIR12	chr3:2365301-2366496 FORWARD LENGTH=1196	auxin-responsive family protein	703.78	839.34	698.75	747.06	49.97	188.91	239.17	200.33	209.81	17.05	-3.56	-3	-4.25	*	979.47	866.64	831.87	893.16	45.42	299.99	361.74	289.73	317.14	24.84	-2.82	-2.43	-3.3	*	19	1.04	0	0	0	0
AT5G67350	AT5G67350_at		chr5:26868290-26869486 REVERSE LENGTH=1197	unknown protein; Has 1807 Blast hits to 1807 proteins in 277 species: Archae - 0; Bacteria - 0; Metazoa - 736; Fungi - 347; Plants - 385; Viruses - 0; Other Eukaryotes - 339 (source: NCBI BLink).	86.36	109.79	84.94	93.77	8.77	50.96	26.93	37.48	37.78	7.49	-2.48	-1.79	-3.77	*	66.94	52.95	41.08	53.66	7.73	19.85	33.3	22.97	25.39	4.58	-2.11	-1.45	-3.18	*	18.9944	-1.33	*	0	0	0
AT5G12080	AT5G12080_at	MSL10, ATMSL10	chr5:3898047-3901520 REVERSE LENGTH=2565	mechanosensitive channel of small conductance-like 10	50.4	50.73	50.44	50.53	2.18	25.34	20.54	17.7	21.2	2.61	-2.38	-1.95	-3.02	*	54.48	40.25	36.53	43.69	5.67	20.75	22.44	20.48	21.24	1.58	-2.06	-1.58	-2.6	*	18.9744	-0.94	0	0	0	0
AT1G31850	AT1G31850_at		chr1:11430222-11433699 FORWARD LENGTH=2324	S-adenosyl-L-methionine-dependent methyltransferases superfamily protein	236.2	206.78	217.62	220.81	9.6	153.32	176.4	134.06	155.11	13.46	-1.42	-1.22	-1.68	*	237.58	308.46	283.99	276.56	22.14	253.19	240.19	220.34	237.59	10.6	-1.16	-0.99	-1.35	0	18.8525	1.07	0	0	0	0
AT1G15440	AT1G15440_at	PWP2, ATPWP2	chr1:5306061-5309514 REVERSE LENGTH=2855	periodic tryptophan protein 2	208.91	195.1	185.38	196.54	7.8	86.24	75.49	60.27	73.91	8.01	-2.66	-2.23	-3.27	*	193.99	163.94	186.42	181.5	9.49	86.74	95.93	74.75	85.84	6.86	-2.11	-1.81	-2.49	*	18.8341	-0.97	0	0	0	0
AT1G68220	AT1G68220_at		chr1:25570231-25571712 FORWARD LENGTH=847	Protein of unknown function (DUF1218)	84.53	75.24	82.74	80.93	4.38	45.92	42.09	47.65	45.19	3.53	-1.79	-1.54	-2.11	*	71.37	76.89	85.25	77.67	5.35	48.69	55.08	56.4	53.18	3.23	-1.46	-1.25	-1.7	*	18.8312	-0.9	0	0	0	0
AT3G05560	AT3G05560_at		chr3:1614178-1615506 FORWARD LENGTH=783	Ribosomal L22e protein family	196.92	158.97	197.35	185.02	12.68	64.54	89.46	89.15	80.84	8.86	-2.29	-1.86	-2.87	*	163.5	133.42	153.99	150.25	9.18	77.77	76.7	97.66	84.04	7.17	-1.79	-1.51	-2.14	*	18.8172	-1.06	0	0	0	0
AT4G22910	AT4G22910_at	FZR2, CCS52A1	chr4:12012677-12016011 FORWARD LENGTH=1866	FIZZY-related 2	157.48	177.41	105.8	146.61	22.39	68.67	80.54	64.54	71.16	6.8	-2.06	-1.49	-2.73	*	166.07	193.08	158.24	172.46	12.14	126.56	129.96	115.5	123.34	6.5	-1.4	-1.21	-1.61	*	18.7919	0.91	0	0	0	0
AT3G53560	AT3G53560_at		chr3:19859627-19861031 REVERSE LENGTH=1405	Tetratricopeptide repeat (TPR)-like superfamily protein	161.67	137.79	151.08	150.3	8.19	65.25	75.08	84.26	75.1	8.41	-2	-1.65	-2.49	*	140.24	126.04	174.04	145.9	15.18	77.68	72.44	101.07	83.97	9.8	-1.74	-1.34	-2.26	*	18.7879	-0.86	0	0	0	0
AT4G17390	AT4G17390_at		chr4:9714092-9715612 REVERSE LENGTH=997	Ribosomal protein L23/L15e family protein	965.21	1192.08	1002.71	1048.73	79.1	623.93	663.54	610.25	632.71	20.01	-1.66	-1.44	-1.89	*	1097.07	959.67	998.27	1017.27	42.03	862.33	681.43	748.68	762.51	54	-1.33	-1.17	-1.53	0	18.75	-0.89	0	1.729	0	0
AT1G67120	AT1G67120_at		chr1:25069562-25095526 REVERSE LENGTH=16347	ATPases;nucleotide binding;ATP binding;nucleoside-triphosphatases;transcription factor binding	121.53	116.22	72.74	103.49	15.6	53.31	51.79	40.94	48.76	4.27	-2.12	-1.55	-2.78	*	341.07	216.36	169.6	242.34	51.05	161.75	108.49	63.17	111.1	28.45	-2.18	-1.26	-4.05	*	18.7097	1.45	*	0	0	0
AT2G39460	AT2G39460_at	ATRPL23A, RPL23A, RPL23AA	chr2:16474149-16476046 FORWARD LENGTH=1400	ribosomal protein L23AA	316.3	377.58	391.73	360.54	25.79	197.16	201.29	188.76	196.17	5.65	-1.84	-1.61	-2.08	*	272.2	277.45	243.7	264.31	11.46	165.28	170.47	198.94	178.28	10.98	-1.48	-1.31	-1.68	*	18.6335	-1.18	0	2.208	0	0
AT2G30860	AT2G30860_at	ATGSTF9, GLUTTR, ATGSTF7, GSTF9	chr2:13138997-13140245 FORWARD LENGTH=802	glutathione S-transferase PHI 9	1499.41	1809.96	1085.6	1465.52	212.43	407.34	819.48	417.76	548.11	137.19	-2.67	-1.72	-4.72	*	1219.74	1159.42	1138.45	1171.32	32.35	750.7	809.9	779.34	781.56	23.23	-1.5	-1.4	-1.6	*	18.6047	-0.95	0	0	0	0
AT1G63940	AT1G63940_at	MDAR6	chr1:23729979-23733892 FORWARD LENGTH=1956	monodehydroascorbate reductase 6	193.97	198.59	168.39	186.82	10.22	81.91	99.12	62.32	81.01	11.28	-2.31	-1.84	-3.03	*	203.08	212.38	179.97	198.64	10.3	123.73	120.6	96.16	113.47	9.16	-1.75	-1.5	-2.06	*	18.4783	0.94	0	0	0	0
AT1G18850	AT1G18850_at		chr1:6504806-6506424 REVERSE LENGTH=1456	unknown protein; FUNCTIONS IN: molecular_function unknown; INVOLVED IN: biological_process unknown; LOCATED IN: nucleolus; EXPRESSED IN: 22 plant structures; EXPRESSED DURING: 13 growth stages; Has 40 Blast hits to 40 proteins in 13 species: Archae - 0; Bacteria - 0; Metazoa - 0; Fungi - 0; Plants - 40; Viruses - 0; Other Eukaryotes - 0 (source: NCBI BLink).	151.99	144.07	127.88	141.41	7.85	69.87	85.95	84.35	79.99	5.99	-1.77	-1.52	-2.07	*	161.06	145.75	112.26	140.07	14.76	88.28	98.34	87.01	91.65	4.78	-1.53	-1.24	-1.84	*	18.4211	-0.84	0	0	0	0
AT4G28210	AT4G28210_at	emb1923	chr4:13990617-13992078 FORWARD LENGTH=1211	embryo defective 1923	549.26	534.23	587.44	556.25	18.55	306.52	347.4	301.28	318.58	17.13	-1.75	-1.58	-1.94	*	412.51	515.26	445.38	457.72	33.06	298.35	316.66	314.96	309.93	10.04	-1.48	-1.29	-1.67	*	18.3544	-1.07	0	0	0	0
AT3G59540	AT3G59540_at		chr3:21995677-21996836 REVERSE LENGTH=524	Ribosomal L38e protein family	824.23	767.37	944.24	842.8	54.93	516.36	553.84	563.04	544.16	17.4	-1.55	-1.37	-1.74	*	680.5	577.29	730.4	663.08	45.4	472.23	410.61	577.62	486.96	48.96	-1.36	-1.12	-1.68	0	18.2482	-1.09	0	0	0	0
AT1G27435	AT1G27435_at		chr1:9527574-9528878 REVERSE LENGTH=692	unknown protein; Has 16 Blast hits to 16 proteins in 8 species: Archae - 0; Bacteria - 0; Metazoa - 0; Fungi - 0; Plants - 16; Viruses - 0; Other Eukaryotes - 0 (source: NCBI BLink).	770.82	764.98	699.74	745.61	30.11	442.46	508.82	466.08	471.63	22.76	-1.58	-1.43	-1.76	*	691.63	666.94	553.59	637.38	44.38	506.05	458.59	468.57	478.89	16.04	-1.33	-1.17	-1.5	0	18.1818	-1.03	0	0	0	0
AT1G63000	AT1G63000_at	NRS/ER, UER1	chr1:23342393-23344113 FORWARD LENGTH=1277	nucleotide-rhamnose synthase/epimerase-reductase	206.67	215.31	169.32	196.89	14.83	71.23	81.34	75.35	75.74	5.06	-2.6	-2.2	-3.07	*	158.59	149.99	163.17	156.53	5.93	81.51	75.38	79.8	79.06	3.55	-1.98	-1.8	-2.18	*	18.1818	-1.09	0	0	0	0
AT5G45420	AT5G45420_at		chr5:18404069-18406606 REVERSE LENGTH=1292	Duplicated homeodomain-like superfamily protein	257.62	314.78	246.53	272.31	23.02	143.23	163.5	134.27	146.8	10.06	-1.85	-1.54	-2.21	*	206.93	223.45	216.23	215.37	7.42	163.25	156.67	152.51	157.44	5.19	-1.37	-1.26	-1.48	*	18.1818	-1.08	0	0	0	0
AT2G41600	AT2G41600_at		chr2:17344637-17346737 REVERSE LENGTH=809	Mitochondrial glycoprotein family protein	204.61	179.86	214.59	199.69	10.52	124.33	132.57	145.63	134.1	6.94	-1.49	-1.32	-1.68	*	144.01	153.05	162.27	152.92	6.29	113.63	105.27	141.97	120.26	11.34	-1.27	-1.08	-1.52	0	18.1818	-1.17	0	0	0	0
AT3G49720	AT3G49720_at		chr3:18440003-18442198 REVERSE LENGTH=1139	unknown protein; FUNCTIONS IN: molecular_function unknown; INVOLVED IN: biological_process unknown; LOCATED IN: chloroplast thylakoid membrane, Golgi apparatus, plasma membrane, membrane; EXPRESSED IN: 25 plant structures; EXPRESSED DURING: 15 growth stages; BEST Arabidopsis thaliana protein match is: unknown protein (TAIR:AT5G65810.1); Has 64 Blast hits to 64 proteins in 11 species: Archae - 0; …	1027.83	1171.61	1091.86	1093.94	54.42	763.87	867.14	773.2	803.04	42.58	-1.36	-1.21	-1.54	*	1356.92	1047.97	918.83	1105.11	132.64	989.51	803.87	802.46	868.3	65.13	-1.27	-0.99	-1.59	0	18.1818	0.8	0	0	0	0
AT3G48930	AT3G48930_at	EMB1080	chr3:18140771-18142281 REVERSE LENGTH=821	Nucleic acid-binding, OB-fold-like protein	600.77	653.38	618.69	624.03	23.03	259.97	358	336.56	318.03	32.72	-1.96	-1.66	-2.38	*	614.29	484.62	475.97	526.56	47.78	327.63	290.19	351.35	322.67	18.79	-1.63	-1.36	-1.94	*	18.0723	-1.02	0	0	0	0
AT5G15320	AT5G15320_at		chr5:4977535-4978880 FORWARD LENGTH=487	unknown protein; FUNCTIONS IN: molecular_function unknown; INVOLVED IN: biological_process unknown; LOCATED IN: endomembrane system; EXPRESSED IN: 23 plant structures; EXPRESSED DURING: 15 growth stages; BEST Arabidopsis thaliana protein match is: unknown protein (TAIR:AT3G01130.1); Has 64 Blast hits to 64 proteins in 11 species: Archae - 0; Bacteria - 0; Metazoa - 0; Fungi - 0; Plants - 64; Viru…	806.58	767.41	739.34	772.4	24.46	354.28	422.63	423.04	399.47	25.84	-1.93	-1.72	-2.19	*	694.33	528.73	611.95	608.92	49.66	387.06	324.42	382.47	363.6	22.56	-1.67	-1.41	-1.98	*	18.0233	-1.11	0	0	0	0
AT2G44120	AT2G44120_at		chr2:18249042-18250708 REVERSE LENGTH=1220	Ribosomal protein L30/L7 family protein	312.55	285.36	263.84	287.56	16.67	178.07	184.28	140.82	167.92	14.83	-1.71	-1.45	-2.05	*	252.56	210.3	225.02	228.45	13.26	188.31	150.11	158.17	165.02	12.1	-1.38	-1.19	-1.62	0	17.931	-1.1	0	0.00628	0.00638	0
AT1G74060	AT1G74060_at		chr1:27849833-27851374 REVERSE LENGTH=977	Ribosomal protein L6 family protein	308.25	299.14	312.02	307.63	7.96	245.56	218.52	169.3	211.25	23.12	-1.46	-1.23	-1.78	*	354.78	284.86	225.75	288.2	37.54	249.99	193.78	216.22	219.15	17.08	-1.32	-1.01	-1.67	0	17.8862	-0.87	0	0	0	0
AT4G27010	AT4G27010_at		chr4:13557974-13568296 FORWARD LENGTH=7796	CONTAINS InterPro DOMAIN/s: Ribosome 60S biogenesis N-terminal (InterPro:IPR021714); BEST Arabidopsis thaliana protein match is: unknown protein (TAIR:AT1G72270.1); Has 30201 Blast hits to 17322 proteins in 780 species: Archae - 12; Bacteria - 1396; Metazoa - 17338; Fungi - 3422; Plants - 5037; Viruses - 0; Other Eukaryotes - 2996 (source: NCBI BLink).	80.04	86.85	60.64	75.52	8.57	29.79	33.1	24.93	29.49	3.35	-2.56	-1.96	-3.35	*	84.47	87.41	57.49	76.42	10.04	34.53	42.24	22.62	33	6.2	-2.32	-1.61	-3.51	*	17.8571	0.75	0	0	0	0
AT5G53290	AT5G53290_at	CRF3	chr5:21617813-21619267 REVERSE LENGTH=1455	cytokinin response factor 3	179.65	222.6	161.83	187.83	18.91	57.03	76.79	87.46	73.48	9.62	-2.56	-1.96	-3.4	*	394.47	155.87	152.76	234.37	79.88	69.86	64.08	56.64	63.69	4.16	-3.68	-1.61	-5.84	*	17.8571	0.54	0	0	0	0
AT2G46520	AT2G46520_at		chr2:19096768-19100272 FORWARD LENGTH=3418	cellular apoptosis susceptibility protein, putative / importin-alpha re-exporter, putative	196.99	187.26	169.63	184.94	9.42	89.26	108.73	106.18	101.32	8.01	-1.83	-1.57	-2.14	*	198.56	179.36	201.58	193.15	8.32	133.42	134.39	141.18	136.48	4.8	-1.42	-1.29	-1.55	*	17.8344	0.94	0	0	0	0
AT5G02590	AT5G02590_at		chr5:583086-584179 FORWARD LENGTH=1094	Tetratricopeptide repeat (TPR)-like superfamily protein	30.98	49.11	20.31	33.47	8.72	7.89	11.29	13.28	10.7	2.04	-3.13	-1.69	-5.25	*	50.85	23.1	21.49	31.85	9.5	13.6	9.58	10.12	11.29	1.75	-2.82	-1.39	-4.64	*	17.7515	-0.53	0	0	0	0
AT1G78210	AT1G78210_at		chr1:29422716-29424375 REVERSE LENGTH=1130	alpha/beta-Hydrolases superfamily protein	186.66	256.78	192.35	212.01	23.09	79.99	77.98	78.23	78.6	2.34	-2.7	-2.2	-3.21	*	197.32	245.12	148.39	197.02	28.23	92.49	82.78	64.54	79.85	8.49	-2.47	-1.81	-3.28	*	17.7273	-0.81	0	0	0	0
AT3G19790	AT3G19790_at		chr3:6874603-6875540 REVERSE LENGTH=938	unknown protein; FUNCTIONS IN: molecular_function unknown; INVOLVED IN: biological_process unknown; LOCATED IN: cellular_component unknown; EXPRESSED IN: 24 plant structures; EXPRESSED DURING: 15 growth stages; Has 32 Blast hits to 26 proteins in 8 species: Archae - 0; Bacteria - 0; Metazoa - 13; Fungi - 2; Plants - 14; Viruses - 0; Other Eukaryotes - 3 (source: NCBI BLink).	26.66	22.25	30.85	26.28	3.06	13.83	16.98	12.89	14.3	1.99	-1.84	-1.37	-2.51	*	19.77	22.19	19.73	20.46	1.67	14.71	11.81	16.23	14.34	1.8	-1.43	-1.13	-1.85	0	17.5182	-1	0	0	0	0
AT4G25630	AT4G25630_at	FIB2, ATFIB2	chr4:13074133-13076429 FORWARD LENGTH=1293	fibrillarin 2	192.93	202.24	245.59	213.18	17.5	82.63	71.8	47.86	67.08	11.07	-3.18	-2.4	-4.46	*	207.15	145.9	129.82	160.42	23.74	59.18	64.17	54.85	59.99	4.49	-2.67	-1.98	-3.45	*	17.5	-1.02	0	0	0	2.104
AT1G42480	AT1G42480_at		chr1:15936230-15938863 FORWARD LENGTH=787	unknown protein; FUNCTIONS IN: molecular_function unknown; INVOLVED IN: biological_process unknown; LOCATED IN: endomembrane system; EXPRESSED IN: 24 plant structures; EXPRESSED DURING: 13 growth stages; CONTAINS InterPro DOMAIN/s: Protein of unknown function DUF3456 (InterPro:IPR021852); Has 152 Blast hits to 152 proteins in 48 species: Archae - 0; Bacteria - 0; Metazoa - 113; Fungi - 0; Plants …	191.56	258.76	196.27	215.41	22.55	66.48	89.47	70.03	74.99	8.38	-2.87	-2.23	-3.72	*	197.58	224.77	209.12	210.36	9.54	109.84	99.54	75.34	94.69	10.62	-2.22	-1.84	-2.76	*	17.4888	-0.84	0	0	0	0
AT3G23830	AT3G23830_at	GR-RBP4, GRP4	chr3:8606477-8608055 REVERSE LENGTH=792	glycine-rich RNA-binding protein 4	357.31	337.41	374.33	355.78	12.76	127.34	163.24	146.21	145.45	12.11	-2.45	-2.12	-2.86	*	369.57	230.86	271.51	290.56	41.06	136.18	119.81	118.83	125.68	6.95	-2.31	-1.75	-2.91	*	17.4528	-0.98	0	0	0	0
AT5G02610	AT5G02610_at		chr5:587508-588800 FORWARD LENGTH=797	Ribosomal L29 family protein	593.64	471.5	524.41	536.71	40.41	314.25	362.91	305.6	328.34	23.35	-1.63	-1.38	-1.94	*	573.89	379.19	459.99	469.92	57.65	343.41	249.42	345.68	312.62	33.55	-1.5	-1.14	-1.96	0	17.3913	-0.91	0	0	0	0
AT1G11780	AT1G11780_at		chr1:3976839-3979195 REVERSE LENGTH=1831	oxidoreductase, 2OG-Fe(II) oxygenase family protein	127.08	124.14	106.3	119.26	7.21	60.37	74.98	74.73	69.99	5.95	-1.7	-1.44	-2.04	*	95.95	99.08	94.83	96.67	2.71	76.26	75.68	77.07	76.32	1.96	-1.27	-1.19	-1.35	0	17.3611	-1.1	0	0	0	0
AT5G47930	AT5G47930_at		chr5:19406163-19407400 REVERSE LENGTH=586	Zinc-binding ribosomal protein family protein	163.46	153.29	172.64	163.6	6.54	68.35	78.18	100.99	82.45	10.39	-1.98	-1.62	-2.52	*	120.5	87.4	114.55	107.19	10.71	66.09	59.98	68.72	65.24	3.93	-1.64	-1.34	-1.98	*	17.284	-1.29	*	0	0	0
AT4G37000	AT4G37000_at	ACD2, ATRCCR	chr4:17442612-17443855 FORWARD LENGTH=1068	accelerated cell death 2 (ACD2)	701.39	481.99	620.63	601.9	63.79	183.33	173.55	186.48	180.71	7.87	-3.33	-2.72	-3.98	*	534.01	553.97	625.26	569.02	30.93	243.57	206.14	220.16	222.92	11.79	-2.55	-2.25	-2.89	*	17.2794	-0.86	0	0	0	0
AT2G03480	AT2G03480_at	QUL2	chr2:1050842-1054613 FORWARD LENGTH=2642	QUASIMODO2 LIKE 2	125.5	124.15	104.73	118.63	7.48	75.83	77.14	62.88	72.32	5.66	-1.64	-1.39	-1.94	*	109.37	65.07	70.99	81.9	13.96	56.52	48.69	44.61	50.18	4.31	-1.63	-1.15	-2.18	0	17.2662	-1.1	0	0	0	0
AT3G15020	AT3G15020_at	mMDH2	chr3:5056068-5058248 FORWARD LENGTH=1404	Lactate/malate dehydrogenase family protein	153.08	303.17	144.83	200.35	52.01	43.5	64.01	37.29	48.23	8.74	-4.15	-2.26	-6.86	*	281.55	143.36	149.4	191.54	44.96	68.43	58.33	60.21	62.27	3.77	-3.08	-1.87	-4.34	*	17.2566	-0.55	0	0	0	0
AT1G80750	AT1G80750_at		chr1:30348801-30350564 FORWARD LENGTH=975	Ribosomal protein L30/L7 family protein	298.46	252.15	208.04	253.19	26.63	164.02	130.28	97.7	130.63	19.5	-1.94	-1.45	-2.68	*	473.58	310.94	294.38	359.58	56.98	247.6	225.61	156.94	209.92	27.63	-1.71	-1.2	-2.4	0	17.2414	1.01	0	0	0	0
AT5G02450	AT5G02450_at		chr5:533106-534656 FORWARD LENGTH=684	Ribosomal protein L36e family protein	639.85	771.58	734.05	715.28	45.72	509.15	550.74	472.29	509.56	29.77	-1.4	-1.22	-1.62	*	656.27	479.43	495.07	543.6	57.46	414.42	439.43	464.95	439.2	21.22	-1.24	-1.01	-1.48	0	17.2131	-1.08	0	0	0	0
AT1G80720	AT1G80720_at		chr1:30336138-30337565 FORWARD LENGTH=942	Mitochondrial glycoprotein family protein	193.56	169.88	182.56	181.99	7.37	76.5	71.84	78.58	75.26	4.62	-2.42	-2.15	-2.74	*	144.34	104.03	132.55	126.49	12.54	56.54	62.33	55.42	57.55	4.08	-2.2	-1.78	-2.67	*	17.2093	-1.22	*	0	0	0
AT2G47470	AT2G47470_at	ATPDIL2-1, UNE5, MEE30, PDI11, ATPDI11	chr2:19481420-19484015 FORWARD LENGTH=1423	thioredoxin family protein	514.52	696.37	404.84	538.01	87.2	208.32	242.38	146.16	198.89	28.89	-2.71	-1.86	-3.88	*	835.05	765.25	579.97	726.65	76.42	363.46	435.52	278.05	358.53	46.88	-2.03	-1.54	-2.71	*	17.2043	1	0	1.808	2.747	0
AT1G56580	AT1G56580_at	SVB	chr1:21198259-21198956 REVERSE LENGTH=698	Protein of unknown function, DUF538	255.05	327.84	298.42	292.89	22.99	117.37	161.84	118.36	132.47	16.59	-2.21	-1.75	-2.87	*	431.44	344.31	347.91	375.74	29.45	225.55	235.04	210.04	222.96	9.43	-1.69	-1.45	-1.94	*	17.1429	1.07	0	0	0	0
AT1G54270	AT1G54270_at	EIF4A-2	chr1:20259692-20262266 FORWARD LENGTH=1759	eif4a-2	360.81	295.08	300.58	321.94	23.63	194.59	204.56	190.58	198.2	10.02	-1.62	-1.4	-1.87	*	308.23	257.74	274.97	279.01	17.12	206.6	188.28	230.3	207.55	13.95	-1.34	-1.16	-1.56	0	17.1429	-0.98	0	1.964	0	0
AT1G56340	AT1G56340_at	CRT1, CRT1a, AtCRT1a	chr1:21089844-21092660 REVERSE LENGTH=1523	calreticulin 1a	536.19	670.98	327.15	509.68	103.48	206.7	233.8	163.61	200.95	21.72	-2.54	-1.64	-3.6	*	784.44	720.15	600.98	702.02	54.04	467.66	444.08	271.85	394.52	62.21	-1.78	-1.36	-2.45	*	17.0732	1	0	0	2.267	0
AT3G60245	AT3G60245_at		chr3:22268746-22270006 FORWARD LENGTH=592	Zinc-binding ribosomal protein family protein	322.33	341.94	378.68	347.22	17.31	178.58	174.9	141.77	165.31	12.45	-2.1	-1.82	-2.45	*	243.83	212.84	223.8	227.32	9.84	144.51	123.66	137.81	135.11	6.96	-1.68	-1.51	-1.88	*	17.033	-1.37	*	0	0	0
AT2G40700	AT2G40700_at		chr2:16976783-16979558 FORWARD LENGTH=1996	P-loop containing nucleoside triphosphate hydrolases superfamily protein	71.38	72.51	56.5	66.88	5.64	44.45	32.2	38.03	37.87	4.21	-1.77	-1.41	-2.24	*	84.08	55.65	62.51	67.21	8.69	47.34	45.78	39.59	44.23	2.85	-1.52	-1.17	-1.9	0	17.0213	0.77	0	0	0	0
AT2G29760	AT2G29760_at	OTP81	chr2:12712884-12715852 FORWARD LENGTH=2733	Tetratricopeptide repeat (TPR)-like superfamily protein	35.15	33.1	24.95	31.17	3.37	14.51	12.15	10.8	12.62	1.59	-2.47	-1.88	-3.28	*	28.19	32.89	35.6	32.13	2.7	17.61	16.56	15.4	16.68	1.64	-1.93	-1.56	-2.4	*	17.0213	0.83	0	0	0	0
AT4G15920	AT4G15920_at	SWEET17, AtSWEET17	chr4:9030517-9033395 REVERSE LENGTH=1003	Nodulin MtN3 family protein	228.2	231.84	239.25	232.62	5.94	40.38	51.51	44	45.33	4.73	-5.13	-4.35	-6.22	*	198.33	147.4	149.09	165.15	16.83	37.72	38.79	32.54	36.76	2.86	-4.49	-3.61	-5.53	*	17.0115	-1.2	0	0	0	0
AT5G53070	AT5G53070_at		chr5:21518593-21520421 FORWARD LENGTH=1061	Ribosomal protein L9/RNase H1	348.06	266.64	296.78	303.55	23.85	145.89	157.41	136.61	146.43	7.41	-2.07	-1.77	-2.41	*	324.9	260.93	323.64	303.14	21.12	201.58	147.09	164.93	171.03	16.11	-1.77	-1.47	-2.16	*	16.9492	-0.84	0	0	0	0
AT5G49560	AT5G49560_at		chr5:20110961-20111785 REVERSE LENGTH=825	Putative methyltransferase family protein	41.8	51.45	39.02	44.2	4.62	28.12	27.53	26.31	27.28	2.1	-1.62	-1.3	-2	*	32.79	30.91	30.9	31.59	1.6	27.44	22.18	25.26	25.14	2.05	-1.26	-1.08	-1.48	0	16.9231	-1.14	0	0	0	0
AT1G74100	AT1G74100_at	SOT16, ATSOT16, CORI-7, ATST5A	chr1:27864345-27865694 REVERSE LENGTH=1350	sulfotransferase 16	279.62	241.6	250.62	257.72	12.93	149	166.87	120.61	145.22	14.89	-1.77	-1.48	-2.17	*	247.82	263.99	266.78	259.47	9.94	201.14	191.42	186.37	192.46	7.09	-1.35	-1.23	-1.47	*	16.8919	0.91	0	0	0	0
AT2G04400	AT2G04400_at		chr2:1531148-1533737 FORWARD LENGTH=1428	Aldolase-type TIM barrel family protein	453.71	703.26	408.62	521.69	92.75	183.24	302.7	157.29	214.35	45.63	-2.43	-1.54	-4.01	*	479.3	591.69	377.96	483.02	62.81	305.33	310.56	260.26	292.07	17.11	-1.65	-1.28	-2.06	*	16.8831	-0.73	0	0	0	0
AT5G55070	AT5G55070_at		chr5:22347211-22350817 FORWARD LENGTH=1998	Dihydrolipoamide succinyltransferase	484.78	552.52	451.16	496.56	34.2	258.1	293.37	211.92	254.96	25.44	-1.95	-1.6	-2.4	*	571.66	543.42	447.14	520.28	39.94	347.38	356.11	281.52	327.95	24.75	-1.59	-1.33	-1.9	*	16.875	0.88	0	0	0	0
AT1G31180	AT1G31180_at	ATIMD3, IMD3, IPMDH1	chr1:11142714-11144633 REVERSE LENGTH=1360	isopropylmalate dehydrogenase 3	217.2	230.46	188.9	214.06	15.51	102.56	103.72	86.34	97.85	7.22	-2.19	-1.84	-2.6	*	215.73	225.07	178.5	205.74	15.73	118.91	116.4	112.71	115.77	4.89	-1.78	-1.53	-2.04	*	16.8478	-0.87	0	2.576	0	0
AT4G36660	AT4G36660_at		chr4:17285732-17287429 REVERSE LENGTH=909	Protein of unknown function (DUF1195)	158.36	130.01	152.19	146.61	9.47	68.91	73.33	60.24	67.49	5.22	-2.17	-1.84	-2.57	*	124.26	101.6	96.05	107.29	9.01	58.71	55.72	63.38	59.12	3.21	-1.81	-1.53	-2.13	*	16.8478	-1.15	0	0	0	0
AT5G10840	AT5G10840_at		chr5:3424688-3427878 REVERSE LENGTH=2250	Endomembrane protein 70 protein family	186.34	240.75	204.83	210.49	17.48	110.05	113.01	138.06	120.94	10.24	-1.74	-1.43	-2.12	*	169.23	158.79	138.18	155.78	9.76	118.14	106.05	117.65	113.66	6.65	-1.37	-1.19	-1.58	0	16.7832	-1.13	0	0	0	0
AT5G04800	AT5G04800_at		chr5:1388483-1389848 FORWARD LENGTH=753	Ribosomal S17 family protein	252.37	336.63	325.22	304.81	27	174.97	167.14	178.5	173.53	4.41	-1.76	-1.49	-2.03	*	225.17	209.48	250.41	227.99	12.37	155.37	140.86	179.9	158.65	11.64	-1.44	-1.24	-1.68	*	16.7785	-1.12	0	0	0	0
AT2G28000	AT2G28000_at	CPN60A, CH-CPN60A, SLP	chr2:11926449-11929389 FORWARD LENGTH=2120	chaperonin-60alpha	933.05	758.52	828.89	837.08	55.38	260.35	234.86	194.49	229.26	20.07	-3.65	-3.06	-4.4	*	1124.88	1090.08	1130.88	1112.34	27.37	446.61	302.8	338.4	362.3	43.33	-3.07	-2.55	-3.83	*	16.6667	1.19	0	1.966	0	0
AT2G44860	AT2G44860_at		chr2:18500803-18502512 REVERSE LENGTH=797	Ribosomal protein L24e family protein	290.55	264.49	239.62	265.03	15.56	201.22	181.38	152.8	178.44	14.77	-1.49	-1.26	-1.77	*	297.8	242.88	246.54	262.05	18	230.32	200.25	217.51	215.72	10.25	-1.21	-1.05	-1.39	0	16.6667	-0.87	0	2.283	0	0
AT4G31120	AT4G31120_at	PRMT5	chr4:15132119-15136637 REVERSE LENGTH=2158	SHK1 binding protein 1	285.66	280.79	284.84	284.26	7.38	208.32	170.03	153.31	176.86	16.83	-1.61	-1.38	-1.91	*	318.21	290.73	276.75	296.28	13.19	254.8	215.01	215.99	228.73	13.66	-1.3	-1.15	-1.47	0	16.6667	0.96	0	0	0	0
AT5G27850	AT5G27850_at		chr5:9873152-9874598 FORWARD LENGTH=882	Ribosomal protein L18e/L15 superfamily protein	577.18	501.02	433.59	506.6	44.55	260.98	283.32	306.1	283.59	14.93	-1.79	-1.5	-2.1	*	477.08	371.93	383.97	411.35	34.46	292.8	240.57	293.07	273.88	19.38	-1.5	-1.25	-1.8	*	16.6667	-1.01	0	0	0	0
AT3G44590	AT3G44590_at		chr3:16163817-16164931 FORWARD LENGTH=681	60S acidic ribosomal protein family	130.07	99.34	141.68	123.69	12.85	52.85	46.19	50.47	49.53	3.71	-2.5	-2	-3.07	*	88.81	65.14	82.52	78.95	7.59	35.24	39.49	38.51	37.77	3.53	-2.09	-1.67	-2.61	*	16.5	-1.24	*	0	0	0
AT5G63060	AT5G63060_at		chr5:25294954-25296849 REVERSE LENGTH=1055	Sec14p-like phosphatidylinositol transfer family protein	35.63	38.72	29.07	34.42	3.33	20.81	17.88	21.02	19.88	1.57	-1.73	-1.4	-2.12	*	28.22	25.75	28.85	27.39	1.5	22.99	16.35	17.79	19.05	2.28	-1.44	-1.17	-1.82	0	16.4286	-1.04	0	0	0	0
AT1G74260	AT1G74260_at	PUR4	chr1:27922833-27927904 REVERSE LENGTH=4536	purine biosynthesis 4	134.24	140.77	107.23	127.62	11.12	83.88	82.46	67.83	78.07	6.63	-1.63	-1.34	-2	*	218.39	164.42	183.84	188.86	15.84	142.41	155.03	125.85	140.98	9.41	-1.34	-1.12	-1.59	0	16.4179	1.21	*	0	0	0
AT4G08390	AT4G08390_at	SAPX	chr4:5314905-5317432 FORWARD LENGTH=1495	stromal ascorbate peroxidase	138.35	146.31	110.66	131.6	11.64	73.89	79.67	70.94	74.96	4.04	-1.76	-1.47	-2.07	*	155.75	117.32	116.24	129.94	13.23	92.52	72.74	90.09	85.26	6.52	-1.52	-1.23	-1.87	*	16.3265	-0.81	0	0	0	0
AT1G73177	AT1G73177_at	BNS	chr1:27516572-27517854 REVERSE LENGTH=432	bonsai	66.05	48.11	65.79	60.22	6.11	33.89	31.5	43.88	36.41	4.15	-1.65	-1.29	-2.14	*	35.88	32.02	41.3	36.22	3.04	26.29	27.62	29.27	27.72	2.17	-1.31	-1.08	-1.58	0	16.2791	-1.33	*	0	0	0
AT4G32400	AT4G32400_at	EMB104, SHS1, EMB42, ATBT1	chr4:15638625-15640465 FORWARD LENGTH=1467	Mitochondrial substrate carrier family protein	158.7	156.03	135.07	150.33	8.58	102.97	116.28	99.21	106.24	6.6	-1.41	-1.23	-1.63	*	147.61	102.52	133.78	127.9	13.39	99.87	106	100.54	101.92	4.29	-1.25	-1.03	-1.49	0	16.2602	-0.97	0	0	0	0
AT3G20000	AT3G20000_at	TOM40	chr3:6967582-6970566 FORWARD LENGTH=1352	translocase of the outer mitochondrial membrane 40	465.39	530.62	400.22	464.57	41.12	246.75	246.59	240.39	244.82	6.94	-1.9	-1.61	-2.19	*	472.45	383.93	367.76	408.5	33.01	266.87	264	253.66	261.08	8	-1.56	-1.35	-1.79	*	16.1491	-0.93	0	0	0	0
AT4G30220	AT4G30220_at	RUXF	chr4:14802950-14804323 REVERSE LENGTH=481	small nuclear ribonucleoprotein F	650.89	605.82	802.41	685.78	61.23	465.9	424.55	442	443.4	14.67	-1.55	-1.31	-1.79	*	542.46	578.99	465.69	530.63	38.37	405.63	361.72	452.06	409.64	27.26	-1.3	-1.1	-1.52	0	16.0305	-1.06	0	0	0	0
AT1G79110	AT1G79110_at		chr1:29759157-29760704 FORWARD LENGTH=1374	zinc ion binding	789.97	939.31	823.46	848.72	50.57	188.37	274.4	158.32	207.2	35.81	-4.1	-3.12	-5.79	*	793.3	826.27	852.74	822.86	22.18	251.48	317.81	232.03	266.86	27.61	-3.08	-2.62	-3.73	*	16.0256	-0.92	0	0	0	0
AT3G25780	AT3G25780_at	AOC3	chr3:9409290-9410567 FORWARD LENGTH=1007	allene oxide cyclase 3	55.43	91.97	49.82	64.95	14.38	12.51	14.98	11.74	12.72	2.15	-5.11	-3.06	-8	*	146.84	212.79	107.82	155.81	31.15	41.61	42.92	36.77	40.04	3.26	-3.89	-2.57	-5.36	*	16.0131	1.45	*	0	0	0
AT5G09510	AT5G09510_at		chr5:2955113-2956673 REVERSE LENGTH=1163	Ribosomal protein S19 family protein	139.25	111.69	165.58	138.74	15.77	80.06	59.22	83.24	74.15	7.75	-1.87	-1.44	-2.41	*	107	93.82	74.43	92.29	9.92	59.59	61.17	65.11	61.87	3.02	-1.49	-1.21	-1.79	*	15.9722	-1.16	0	0	0	0
AT5G13610	AT5G13610_at		chr5:4383013-4385029 FORWARD LENGTH=1490	Protein of unknown function (DUF155)	209.75	210.23	145.7	188.76	21.85	108.9	111.11	84.26	101.34	9.56	-1.86	-1.44	-2.37	*	197.32	124.72	147.3	156.59	21.35	93.96	109.06	91.54	98.23	6.33	-1.59	-1.21	-2.01	*	15.9722	-0.9	0	0	0	0
AT1G21750	AT1G21750_at	ATPDIL1-1, ATPDI5, PDI5, PDIL1-1	chr1:7645700-7648841 FORWARD LENGTH=1900	PDI-like 1-1	426.85	632.52	327.41	462.63	91.06	155.96	196.96	116.28	156.71	24.54	-2.95	-1.88	-4.44	*	639.29	703.71	542.01	628.98	47.85	335.11	372.93	264.67	324.54	32.12	-1.94	-1.58	-2.4	*	15.9574	1	0	2.496	2.582	0
AT1G19520	AT1G19520_at	NFD5	chr1:6759965-6761235 FORWARD LENGTH=1271	pentatricopeptide (PPR) repeat-containing protein	92.35	90.48	83.72	89.31	3.81	53.93	63.63	43.59	53.74	6.21	-1.66	-1.38	-2.07	*	116.92	110.08	84.58	104.29	10.13	83.68	68.41	62.59	71.65	6.52	-1.46	-1.16	-1.81	0	15.942	0.97	0	0	0	0
AT2G39795	AT2G39795_at		chr2:16596987-16598162 FORWARD LENGTH=926	Mitochondrial glycoprotein family protein	39.05	41.46	42.13	40.73	2.23	20.19	19.05	24.95	21.51	2.25	-1.89	-1.57	-2.33	*	37.79	25.83	37.4	33.49	4.22	17.17	23.19	14.64	18.16	2.94	-1.84	-1.32	-2.65	*	15.9236	-0.98	0	0	0	0
AT2G24150	AT2G24150_at	HHP3	chr2:10265484-10267405 REVERSE LENGTH=1243	heptahelical protein 3	375.04	359.94	426.81	387.06	20.82	117.63	192.13	145.7	151.78	22.47	-2.55	-2.01	-3.41	*	228.15	249.93	198.62	226.05	16.24	103.45	109.13	126.97	113.23	7.83	-2	-1.69	-2.35	*	15.9204	-1.48	*	0	0	0
AT3G01790	AT3G01790_at		chr3:283689-285778 REVERSE LENGTH=891	Ribosomal protein L13 family protein	444.44	376.6	375.66	399.2	23.49	166.81	182.13	216.56	188.29	19.21	-2.12	-1.76	-2.6	*	462.48	358.73	400.88	406.39	31.18	263.4	202.04	221.1	228.55	19	-1.78	-1.48	-2.15	*	15.9091	0.86	0	0	0	0
AT5G66680	AT5G66680_at	DGL1	chr5:26617544-26620667 REVERSE LENGTH=1696	dolichyl-diphosphooligosaccharide-protein glycosyltransferase 48kDa subunit family protein	708.73	908.33	685.36	766.76	73	438.24	547.7	418.09	467.91	42.04	-1.64	-1.32	-2.03	*	913.15	871.68	658.96	815.59	79.57	659.41	599.82	539.15	600.14	36.01	-1.36	-1.11	-1.63	0	15.9091	0.85	0	0	0	0
AT1G60660	AT1G60660_at	B5 #5, ATCB5LP, CB5LP	chr1:22342414-22343014 REVERSE LENGTH=601	cytochrome B5-like protein	316.15	284.15	388.35	329.32	31.32	182	205.7	204.63	197.4	9.42	-1.67	-1.39	-1.97	*	195.41	161.32	249.04	201.37	26.07	119.14	119.01	153.26	130.36	11.74	-1.54	-1.17	-1.99	0	15.8273	-1.26	*	0	0	0
AT1G22450	AT1G22450_at	COX6B, ATCOX6B2	chr1:7925121-7927278 FORWARD LENGTH=1262	cytochrome C oxidase 6B	484.12	444.57	353.27	428.06	39.69	246.43	268.52	288.74	267.22	14.29	-1.6	-1.33	-1.9	*	577.08	529.31	499.61	536.37	23.23	464.5	382.26	435	427.73	24.25	-1.25	-1.12	-1.41	0	15.7895	1.07	0	0	0	0
AT3G19440	AT3G19440_at		chr3:6740695-6743253 FORWARD LENGTH=1638	Pseudouridine synthase family protein	201.02	231.26	155.16	195.79	22.74	76.09	66.97	56.46	66.43	6.2	-2.95	-2.28	-3.75	*	219.39	165.84	149.35	178.11	21.21	81.46	73.94	52.42	69.32	9	-2.57	-1.92	-3.46	*	15.7895	-0.83	0	0	0	0
AT5G02870	AT5G02870_at		chr5:657786-659733 FORWARD LENGTH=1472	Ribosomal protein L4/L1 family	339.17	394.7	303.38	345.2	28.38	118.81	174.61	154.35	148.78	17.72	-2.32	-1.84	-2.98	*	369.78	266.66	364.4	333.42	33.57	172.51	155.46	195.78	173.32	13.43	-1.92	-1.55	-2.36	*	15.7609	-0.84	0	0	0	0
AT1G76790	AT1G76790_at		chr1:28822186-28823673 REVERSE LENGTH=1316	O-methyltransferase family protein	36.24	33.53	40.31	36.84	2.67	10.39	9.27	7.68	9.2	1.37	-4	-3.11	-5.42	*	26.39	31.99	20.36	26.14	3.79	5.89	7.65	7.55	7	1.09	-3.73	-2.62	-5.38	*	15.7556	-1.1	0	0	0	0
AT2G11910	AT2G11910_at		chr2:4805684-4807310 REVERSE LENGTH=831	unknown protein; FUNCTIONS IN: molecular_function unknown; INVOLVED IN: biological_process unknown; LOCATED IN: chloroplast envelope; EXPRESSED IN: 22 plant structures; EXPRESSED DURING: 13 growth stages; Has 92883 Blast hits to 31060 proteins in 1576 species: Archae - 765; Bacteria - 32670; Metazoa - 21164; Fungi - 12252; Plants - 4238; Viruses - 1282; Other Eukaryotes - 20512 (source: NCBI BLin…	282.25	209.72	254.27	248.94	21	140.23	138.3	203.27	160.73	21.66	-1.55	-1.21	-2.05	*	199.86	166.13	206.58	190.86	12.8	162.72	117.88	173.98	151.71	17.17	-1.26	-1.02	-1.58	0	15.7025	-1.09	0	1.766	0	0
AT2G25110	AT2G25110_at	SDF2, ATSDL, AtSDF2	chr2:10684135-10686085 FORWARD LENGTH=1197	stromal cell-derived factor 2-like protein precursor	427.97	485.21	383.64	432.21	30.53	148.19	209.95	152.45	169.54	21.28	-2.55	-2.04	-3.29	*	364.14	429.83	368.77	387.72	22.6	196.93	212.96	189.7	199.8	8.23	-1.94	-1.72	-2.18	*	15.6863	-0.96	0	0	0	0
AT1G77510	AT1G77510_at	ATPDIL1-2, PDI6, ATPDI6, PDIL1-2	chr1:29126650-29129612 FORWARD LENGTH=1798	PDI-like 1-2	380.1	521.24	313.83	405.15	62.29	83.49	128.55	68.71	93.83	19.07	-4.32	-2.87	-6.86	*	467.26	540.19	417.67	474.95	37.2	170.3	180.01	135.36	161.37	14.56	-2.94	-2.42	-3.6	*	15.6794	0.9	0	0	0	0
AT1G20950	AT1G20950_at		chr1:7297239-7301415 REVERSE LENGTH=2152	Phosphofructokinase family protein	92.76	106.17	87.55	95.36	6.7	43.7	41.15	29.72	37.72	5.32	-2.53	-1.98	-3.36	*	106.58	106.06	104.5	105.77	3.36	54.87	58.15	59.43	57.48	2.84	-1.84	-1.67	-2.03	*	15.6566	0.98	0	0	0	0
AT5G52650	AT5G52650_at		chr5:21355555-21357105 REVERSE LENGTH=868	RNA binding Plectin/S10 domain-containing protein	798.54	712.3	688.71	732.85	35.8	225.92	371.49	414.69	337.51	58.24	-2.17	-1.67	-3.06	*	627.51	520.97	519.97	555.48	36.06	359.33	292.19	355.82	336.37	22.81	-1.65	-1.41	-1.93	*	15.5689	-1.16	0	0	0	0
AT3G18760	AT3G18760_at		chr3:6457690-6459627 REVERSE LENGTH=714	Translation elongation factor EF1B/ribosomal protein S6 family protein	94.27	103.28	75.18	91	8.64	28.88	39.33	33.86	33.84	3.72	-2.69	-2.12	-3.44	*	94.15	73.99	82.69	83.61	5.85	40.18	36.24	43.05	39.78	2.6	-2.1	-1.79	-2.46	*	15.566	-0.89	0	0	0	0
AT5G19690	AT5G19690_at	STT3A	chr5:6652516-6658411 FORWARD LENGTH=2670	staurosporin and temperature sensitive 3-like A	793.04	1118.28	934.91	947.58	99.17	608.3	600.23	480.77	561.5	43.81	-1.69	-1.35	-2.08	*	710.12	932.69	865.37	836.36	68.4	656.77	644	555.53	618	33.91	-1.35	-1.14	-1.58	0	15.5556	-0.9	0	0	0	0
AT3G17465	AT3G17465_at	RPL3P	chr3:5977817-5979652 REVERSE LENGTH=1297	ribosomal protein L3 plastid	91.14	83.45	72.45	82.94	6.25	53.96	58.11	47.97	53.82	3.96	-1.54	-1.29	-1.83	*	73.17	75.05	67.21	71.98	3.15	58.38	62.12	59.4	59.87	2.64	-1.2	-1.09	-1.33	0	15.5039	-0.99	0	0	0	0
AT4G16720	AT4G16720_at		chr4:9399960-9401382 REVERSE LENGTH=878	Ribosomal protein L23/L15e family protein	2151.89	2158.96	2028.67	2122.05	75.36	1303.39	1619.16	1445.69	1457.32	100.97	-1.46	-1.29	-1.66	*	2280.5	1866.21	1803.06	1984.26	153.68	1672.62	1541.13	1524.47	1571.73	63.84	-1.26	-1.09	-1.45	0	15.5039	-0.93	0	1.93	0	0
AT3G23820	AT3G23820_at	GAE6	chr3:8603444-8605462 FORWARD LENGTH=2019	UDP-D-glucuronate 4-epimerase 6	1556.79	1822.65	1659.97	1685.81	93	1052.68	1277.97	979.33	1098.56	100.48	-1.53	-1.3	-1.85	*	1851.83	1608.98	1562.34	1675.12	93.13	1390.13	1402.54	1324.84	1367.25	45.53	-1.23	-1.1	-1.36	0	15.3846	-0.88	0	0	0	0
AT2G29670	AT2G29670_at		chr2:12681958-12685087 REVERSE LENGTH=2149	Tetratricopeptide repeat (TPR)-like superfamily protein	815.54	980.73	639.64	811.92	99.59	102.82	126.06	77.87	101.74	17.01	-7.98	-5.73	-11.54	*	1222.86	902.04	798.72	974.94	127.44	109.8	180.85	142.5	143.37	23.25	-6.8	-4.85	-9.79	*	15.3578	0.89	0	0	0	0
AT3G04840	AT3G04840_at		chr3:1329665-1331617 FORWARD LENGTH=1074	Ribosomal protein S3Ae	1717.12	1476.98	1741	1647.5	86.38	841.64	977.46	865.45	895.84	47.77	-1.84	-1.63	-2.08	*	1827.62	1561.87	1645.01	1678.52	80.46	1173.72	1005.37	1088.2	1089.31	50.81	-1.54	-1.38	-1.72	*	15.3374	0.91	0	0	0	0
AT2G15690	AT2G15690_at		chr2:6830995-6833777 REVERSE LENGTH=2783	Tetratricopeptide repeat (TPR)-like superfamily protein	264.58	299.21	204.27	256.21	29.09	72.04	96.7	76.34	81.61	8.62	-3.14	-2.42	-4.06	*	315.67	281.16	275.32	291.29	13.59	130.25	133.33	107.74	124.1	8.95	-2.35	-2.05	-2.72	*	15.2893	0.94	0	0	0	0
AT3G62810	AT3G62810_at		chr3:23227682-23228398 FORWARD LENGTH=620	complex 1 family protein / LVR family protein	98.61	109.93	147.96	118.74	15.31	77.54	61.85	70.62	69.86	5.11	-1.7	-1.31	-2.14	*	68.53	74.35	80.92	74.43	4.44	49.26	60.15	61.41	56.64	4.69	-1.31	-1.11	-1.56	0	15.2672	-1.24	*	0	0	0
AT2G38770	AT2G38770_at	EMB2765	chr2:16202963-16210338 REVERSE LENGTH=4837	P-loop containing nucleoside triphosphate hydrolases superfamily protein	73.96	69.37	62.64	68.58	3.88	48.2	50.86	41.41	46.74	3.77	-1.47	-1.25	-1.73	*	116.56	117.23	101.72	112.01	5.71	91.44	101.72	68.18	87.1	10.25	-1.29	-1.06	-1.62	0	15.2	1.44	*	0	0	0
AT1G55490	AT1G55490_at	CPN60B, LEN1	chr1:20715563-20719165 REVERSE LENGTH=2087	chaperonin 60 beta	374.97	258.51	275.33	303.12	36.79	89.54	88.89	55.6	77.51	12.57	-3.91	-2.83	-5.6	*	524.91	644.75	553.91	575.61	39.91	240.94	154.81	163.99	186.73	27.4	-3.08	-2.4	-4.14	*	15.1943	1.53	*	1.745	0	0
AT5G20180	AT5G20180_at		chr5:6810920-6812146 FORWARD LENGTH=636	Ribosomal protein L36	359.71	296.13	311.24	322.83	19.23	129.11	138.96	164.02	143.79	11.39	-2.25	-1.91	-2.66	*	293.34	189.2	252.31	244.69	30.33	107.84	105.17	135	115.75	10	-2.11	-1.62	-2.69	*	15.1832	-1.07	0	0	0	0
AT1G71840	AT1G71840_at		chr1:27022218-27024551 FORWARD LENGTH=1601	transducin family protein / WD-40 repeat family protein	90.49	88.37	90.25	89.72	2.83	67.1	57.91	55.61	60.05	4	-1.49	-1.33	-1.7	*	95.66	58.61	76	76.53	10.81	54.78	53.71	41.01	50.1	4.97	-1.53	-1.13	-2.01	0	15.0376	-0.94	0	0	0	0
AT3G52930	AT3G52930_at		chr3:19626748-19629073 REVERSE LENGTH=1911	Aldolase superfamily protein	778.77	933.67	873	860.66	48.59	619.33	506.95	567.72	563.05	34.08	-1.53	-1.33	-1.75	*	821.88	708	659.11	730.04	48.41	561.21	537.35	597.28	566.3	19.62	-1.29	-1.13	-1.45	0	15.0376	-1.02	0	0	0	0
AT1G71260	AT1G71260_at	ATWHY2, WHY2	chr1:26861657-26863422 REVERSE LENGTH=940	WHIRLY 2	348.26	306.24	301.07	318.13	15.67	163.28	164.88	135.8	154.4	10.52	-2.06	-1.8	-2.37	*	392.1	399.13	408.51	399.78	9.3	264.87	211.02	202.27	226.46	19.83	-1.77	-1.53	-2.07	*	15	1.15	0	0	0	0
