# Supplementary material for: miRNAs mediate SnRK1-dependent energy signaling in Arabidopsis
Source: Front Plant Sci. 2013 Jun 20;4:197. doi: 10.3389/fpls.2013.00197 (PMC3687772; doi:10.3389/fpls.2013.00197)
Supplement: Table S6 — Gene description, functional annotation and cluster enrichment analyses of SGs misregulated in dcl1–9. [file DataSheet6.XLSX]

## Sheet: Induced_Clusters
SUPPLEMENTARY TABLE 6A. FUNCTIONAL ANNOTATION CLUSTERING (DAVID - Huang et al., 2009) FOR THE STARVATION-INDUCED GENES MISREGULATED IN dcl1-9.
	Only clusters with enrichment scores above 1.3 are shown.
Annotation Cluster 1	Enrichment Score: 4.940007682003449
Category	Term	Count	%	PValue	Genes	List Total	Pop Hits	Pop Total	Fold Enrichment	Bonferroni	Benjamini	FDR
GOTERM_BP_FAT	GO:0009063~cellular amino acid catabolic process	8	1.94647	8.84133e-06	AT5G46180, AT3G30775, AT1G06570, AT1G03090, AT4G34030, AT3G47340, AT4G33150, AT5G54080	227	44	13187	10.5623	0.00547545	0.00547545	0.0131186
GOTERM_BP_FAT	GO:0016054~organic acid catabolic process	10	2.43309	1.18949e-05	AT5G46180, AT3G30775, AT1G06570, AT1G03090, AT4G34030, AT5G65110, AT3G51840, AT3G47340, AT4G33150, AT5G54080	227	83	13187	6.9991	0.00735959	0.00368659	0.0176492
GOTERM_BP_FAT	GO:0046395~carboxylic acid catabolic process	10	2.43309	1.18949e-05	AT5G46180, AT3G30775, AT1G06570, AT1G03090, AT4G34030, AT5G65110, AT3G51840, AT3G47340, AT4G33150, AT5G54080	227	83	13187	6.9991	0.00735959	0.00368659	0.0176492
GOTERM_BP_FAT	GO:0009310~amine catabolic process	8	1.94647	1.38908e-05	AT5G46180, AT3G30775, AT1G06570, AT1G03090, AT4G34030, AT3G47340, AT4G33150, AT5G54080	227	47	13187	9.88809	0.00858915	0.00287129	0.0206102
Annotation Cluster 2	Enrichment Score: 3.673047429554878
Category	Term	Count	%	PValue	Genes	List Total	Pop Hits	Pop Total	Fold Enrichment	Bonferroni	Benjamini	FDR
SMART	SM00184:RING	21	5.10949	8.28043e-05	AT4G11360, AT5G42940, AT4G26400, AT3G47160, AT5G22920, AT4G28270, AT3G13430, AT4G27470, AT5G19430, AT1G79380, AT5G38895, AT1G17970, AT5G64920, AT4G03510, AT3G02340, AT3G15070, AT1G24440, AT1G02860, AT5G24870, AT3G19910, AT1G62310	119	506	7639	2.66415	0.00569744	0.00569744	0.08541
SP_PIR_KEYWORDS	zinc-finger	28	6.81265	0.000289943	AT4G11360, AT5G42940, AT3G47160, AT4G28270, AT3G13430, AT4G27470, AT1G79380, AT1G17970, AT3G02340, AT1G24440, AT3G15070, AT3G19910, AT1G62310, AT3G56930, AT4G26400, AT4G05330, AT1G69570, AT5G22920, AT3G12630, AT5G19430, AT4G22820, AT5G38895, AT5G64920, AT2G36320, AT3G52800, AT4G03510, AT1G02860, AT5G24870	407	831	26059	2.15735	0.0525084	0.0133938	0.3585
INTERPRO	IPR001841:Zinc finger, RING-type	21	5.10949	0.000398559	AT4G11360, AT5G42940, AT4G26400, AT3G47160, AT5G22920, AT4G28270, AT3G13430, AT4G27470, AT5G19430, AT1G79380, AT5G38895, AT1G17970, AT5G64920, AT4G03510, AT3G02340, AT3G15070, AT1G24440, AT1G02860, AT5G24870, AT3G19910, AT1G62310	348	506	20592	2.45577	0.185921	0.0977365	0.574938
Annotation Cluster 3	Enrichment Score: 3.17244804273043
Category	Term	Count	%	PValue	Genes	List Total	Pop Hits	Pop Total	Fold Enrichment	Bonferroni	Benjamini	FDR
SMART	SM00259:ZnF_A20	4	0.973236	0.000398386	AT2G36320, AT3G52800, AT3G12630, AT4G22820	119	10	7639	25.6773	0.0271196	0.013653	0.410319
UP_SEQ_FEATURE	zinc finger region:A20-type	4	0.973236	0.00050581	AT2G36320, AT3G52800, AT3G12630, AT4G22820	145	10	8602	23.7297	0.153766	0.153766	0.683558
UP_SEQ_FEATURE	zinc finger region:AN1-type	4	0.973236	0.00050581	AT2G36320, AT3G52800, AT3G12630, AT4G22820	145	10	8602	23.7297	0.153766	0.153766	0.683558
INTERPRO	IPR002653:Zinc finger, A20-type	4	0.973236	0.000521353	AT2G36320, AT3G52800, AT3G12630, AT4G22820	348	10	20592	23.669	0.235924	0.085791	0.751454
SMART	SM00154:ZnF_AN1	4	0.973236	0.00115506	AT2G36320, AT3G52800, AT3G12630, AT4G22820	119	14	7639	18.3409	0.0766481	0.0262314	1.18547
INTERPRO	IPR000058:Zinc finger, AN1-type	4	0.973236	0.00150418	AT2G36320, AT3G52800, AT3G12630, AT4G22820	348	14	20592	16.9064	0.540097	0.176494	2.15378
Annotation Cluster 4	Enrichment Score: 2.1565833540060395
Category	Term	Count	%	PValue	Genes	List Total	Pop Hits	Pop Total	Fold Enrichment	Bonferroni	Benjamini	FDR
INTERPRO	IPR006090:Acyl-CoA oxidase/dehydrogenase, type 1	3	0.729927	0.00406113	AT3G45300, AT5G65110, AT3G51840	348	6	20592	29.5862	0.87752	0.259162	5.71618
INTERPRO	IPR006091:Acyl-CoA oxidase/dehydrogenase, central region	3	0.729927	0.00741341	AT3G45300, AT5G65110, AT3G51840	348	8	20592	22.1897	0.978497	0.347288	10.2039
GOTERM_MF_FAT	GO:0003995~acyl-CoA dehydrogenase activity	3	0.729927	0.00833062	AT3G45300, AT5G65110, AT3G51840	252	8	14015	20.8557	0.933492	0.594841	10.6938
INTERPRO	IPR013764:Acyl-CoA oxidase/dehydrogenase, type1/2, C-terminal	3	0.729927	0.00942593	AT3G45300, AT5G65110, AT3G51840	348	9	20592	19.7241	0.992455	0.386567	12.8017
Annotation Cluster 5	Enrichment Score: 2.154253902056588
Category	Term	Count	%	PValue	Genes	List Total	Pop Hits	Pop Total	Fold Enrichment	Bonferroni	Benjamini	FDR
SMART	SM00526:H15	4	0.973236	0.00115506	AT1G48620, AT3G18035, AT1G06760, AT2G30620	119	14	7639	18.3409	0.0766481	0.0262314	1.18547
INTERPRO	IPR005818:Histone H1/H5	4	0.973236	0.00150418	AT1G48620, AT3G18035, AT1G06760, AT2G30620	348	14	20592	16.9064	0.540097	0.176494	2.15378
INTERPRO	IPR011991:Winged helix repressor DNA-binding	4	0.973236	0.198306	AT1G48620, AT3G18035, AT1G06760, AT2G30620	348	91	20592	2.60099	1	0.971677	95.9115
Annotation Cluster 6	Enrichment Score: 1.8107241697080867
Category	Term	Count	%	PValue	Genes	List Total	Pop Hits	Pop Total	Fold Enrichment	Bonferroni	Benjamini	FDR
GOTERM_BP_FAT	GO:0006012~galactose metabolic process	4	0.973236	0.00682947	AT4G23730, AT1G63180, AT1G12780, AT3G47800	227	23	13187	10.103	0.985816	0.298572	9.66891
GOTERM_MF_FAT	GO:0016857~racemase and epimerase activity, acting on carbohydrates and derivatives	4	0.973236	0.0192026	AT4G23730, AT1G63180, AT1G12780, AT3G47800	252	32	14015	6.95188	0.998131	0.715331	23.0596
GOTERM_MF_FAT	GO:0016854~racemase and epimerase activity	4	0.973236	0.0281891	AT4G23730, AT1G63180, AT1G12780, AT3G47800	252	37	14015	6.01244	0.999905	0.786491	32.0627
Annotation Cluster 7	Enrichment Score: 1.7579821077413706
Category	Term	Count	%	PValue	Genes	List Total	Pop Hits	Pop Total	Fold Enrichment	Bonferroni	Benjamini	FDR
SP_PIR_KEYWORDS	chromosomal protein	6	1.45985	0.00224873	AT1G48620, AT2G28720, AT3G18035, AT5G54640, AT1G06760, AT2G30620	407	59	26059	6.51122	0.342121	0.0674096	2.74966
GOTERM_CC_FAT	GO:0000785~chromatin	7	1.70316	0.00253665	AT1G48620, AT2G28720, AT3G18035, AT5G54640, AT3G51880, AT1G06760, AT2G30620	204	91	13438	5.06712	0.290278	0.290278	2.93377
GOTERM_CC_FAT	GO:0000786~nucleosome	6	1.45985	0.00258772	AT1G48620, AT2G28720, AT3G18035, AT5G54640, AT1G06760, AT2G30620	204	63	13438	6.27358	0.295167	0.160457	2.99202
GOTERM_CC_FAT	GO:0032993~protein-DNA complex	6	1.45985	0.00409353	AT1G48620, AT2G28720, AT3G18035, AT5G54640, AT1G06760, AT2G30620	204	70	13438	5.64622	0.425216	0.129285	4.69519
GOTERM_BP_FAT	GO:0006333~chromatin assembly or disassembly	7	1.70316	0.00523682	AT1G48620, AT2G28720, AT3G18035, AT5G54640, AT3G51880, AT1G06760, AT2G30620	227	93	13187	4.37255	0.961635	0.278239	7.49542
GOTERM_BP_FAT	GO:0006334~nucleosome assembly	6	1.45985	0.00653131	AT1G48620, AT2G28720, AT3G18035, AT5G54640, AT1G06760, AT2G30620	227	69	13187	5.05152	0.98291	0.309218	9.26567
GOTERM_BP_FAT	GO:0034728~nucleosome organization	6	1.45985	0.00653131	AT1G48620, AT2G28720, AT3G18035, AT5G54640, AT1G06760, AT2G30620	227	69	13187	5.05152	0.98291	0.309218	9.26567
GOTERM_BP_FAT	GO:0031497~chromatin assembly	6	1.45985	0.00736177	AT1G48620, AT2G28720, AT3G18035, AT5G54640, AT1G06760, AT2G30620	227	71	13187	4.90923	0.989833	0.27946	10.3847
GOTERM_BP_FAT	GO:0065004~protein-DNA complex assembly	6	1.45985	0.00780343	AT1G48620, AT2G28720, AT3G18035, AT5G54640, AT1G06760, AT2G30620	227	72	13187	4.84104	0.992288	0.276988	10.9745
GOTERM_CC_FAT	GO:0044427~chromosomal part	8	1.94647	0.00951659	AT1G48620, AT2G28720, AT3G18035, AT5G54640, AT3G51880, AT1G06760, AT2G30620, AT1G80190	204	156	13438	3.37808	0.724974	0.193578	10.6049
GOTERM_BP_FAT	GO:0006323~DNA packaging	6	1.45985	0.0102902	AT1G48620, AT2G28720, AT3G18035, AT5G54640, AT1G06760, AT2G30620	227	77	13187	4.52669	0.998377	0.330658	14.2287
GOTERM_CC_FAT	GO:0005694~chromosome	8	1.94647	0.0401993	AT1G48620, AT2G28720, AT3G18035, AT5G54640, AT3G51880, AT1G06760, AT2G30620, AT1G80190	204	210	13438	2.50943	0.99607	0.499613	38.1847
GOTERM_BP_FAT	GO:0034621~cellular macromolecular complex subunit organization	8	1.94647	0.0785154	AT1G68110, AT1G48620, AT2G28720, AT4G18740, AT3G18035, AT5G54640, AT1G06760, AT2G30620	227	216	13187	2.15157	1	0.746501	70.2801
GOTERM_BP_FAT	GO:0006325~chromatin organization	8	1.94647	0.0830582	AT1G48620, AT2G28720, AT3G18035, AT5G54640, AT3G51880, AT1G06760, AT2G30620, AT1G04400	227	219	13187	2.1221	1	0.757571	72.3816
GOTERM_BP_FAT	GO:0034622~cellular macromolecular complex assembly	7	1.70316	0.12489	AT1G68110, AT1G48620, AT2G28720, AT3G18035, AT5G54640, AT1G06760, AT2G30620	227	198	13187	2.05378	1	0.828411	86.1872
GOTERM_BP_FAT	GO:0051276~chromosome organization	8	1.94647	0.155274	AT1G48620, AT2G28720, AT3G18035, AT5G54640, AT3G51880, AT1G06760, AT2G30620, AT1G04400	227	258	13187	1.80132	1	0.861537	91.8237
GOTERM_BP_FAT	GO:0043933~macromolecular complex subunit organization	8	1.94647	0.203611	AT1G68110, AT1G48620, AT2G28720, AT4G18740, AT3G18035, AT5G54640, AT1G06760, AT2G30620	227	279	13187	1.66574	1	0.908945	96.5895
GOTERM_BP_FAT	GO:0065003~macromolecular complex assembly	7	1.70316	0.288992	AT1G68110, AT1G48620, AT2G28720, AT3G18035, AT5G54640, AT1G06760, AT2G30620	227	260	13187	1.56403	1	0.931511	99.3661
Annotation Cluster 8	Enrichment Score: 1.7258054016036155
Category	Term	Count	%	PValue	Genes	List Total	Pop Hits	Pop Total	Fold Enrichment	Bonferroni	Benjamini	FDR
GOTERM_BP_FAT	GO:0031667~response to nutrient levels	6	1.45985	0.0120175	AT5G17290, AT1G03380, AT2G45170, AT5G21170, AT3G47340, AT5G54730	227	80	13187	4.35694	0.999451	0.357026	16.4233
GOTERM_BP_FAT	GO:0009991~response to extracellular stimulus	6	1.45985	0.0208767	AT5G17290, AT1G03380, AT2G45170, AT5G21170, AT3G47340, AT5G54730	227	92	13187	3.78864	0.999998	0.44873	26.8797
GOTERM_BP_FAT	GO:0042594~response to starvation	5	1.21655	0.0264916	AT5G17290, AT1G03380, AT2G45170, AT3G47340, AT5G54730	227	66	13187	4.40095	1	0.486715	32.8609
Annotation Cluster 9	Enrichment Score: 1.7188460704225363
Category	Term	Count	%	PValue	Genes	List Total	Pop Hits	Pop Total	Fold Enrichment	Bonferroni	Benjamini	FDR
GOTERM_CC_FAT	GO:0005759~mitochondrial matrix	6	1.45985	0.00489925	AT5G53350, AT3G30775, AT3G45300, AT1G03090, AT4G34030, AT5G47040	204	73	13438	5.41418	0.484709	0.124189	5.59523
GOTERM_CC_FAT	GO:0031980~mitochondrial lumen	6	1.45985	0.00489925	AT5G53350, AT3G30775, AT3G45300, AT1G03090, AT4G34030, AT5G47040	204	73	13438	5.41418	0.484709	0.124189	5.59523
GOTERM_CC_FAT	GO:0044429~mitochondrial part	7	1.70316	0.290538	AT5G53350, AT3G30775, AT3G45300, AT1G03090, AT4G34030, AT5G47040, AT2G43400	204	296	13438	1.5578	1	0.901424	98.2121
Annotation Cluster 10	Enrichment Score: 1.6889089314684727
Category	Term	Count	%	PValue	Genes	List Total	Pop Hits	Pop Total	Fold Enrichment	Bonferroni	Benjamini	FDR
INTERPRO	IPR003663:Sugar/inositol transporter	6	1.45985	0.00195267	AT1G75220, AT2G48020, AT1G11260, AT5G27350, AT1G77210, AT1G08920	348	53	20592	6.69876	0.635258	0.18267	2.78755
SP_PIR_KEYWORDS	sugar transport	6	1.45985	0.00343917	AT1G75220, AT2G48020, AT1G11260, AT5G27350, AT1G77210, AT1G08920	407	65	26059	5.91019	0.473123	0.0687232	4.17698
INTERPRO	IPR005829:Sugar transporter, conserved site	7	1.70316	0.00373056	AT1G75220, AT2G29290, AT2G48020, AT1G11260, AT5G27350, AT1G77210, AT1G08920	348	88	20592	4.7069	0.854644	0.274887	5.26251
INTERPRO	IPR005828:General substrate transporter	6	1.45985	0.00417246	AT1G75220, AT2G48020, AT1G11260, AT5G27350, AT1G77210, AT1G08920	348	63	20592	5.63547	0.884385	0.236381	5.8685
GOTERM_BP_FAT	GO:0008643~carbohydrate transport	6	1.45985	0.0139319	AT1G75220, AT2G48020, AT1G11260, AT5G27350, AT1G77210, AT1G08920	227	83	13187	4.19946	0.999835	0.383705	18.7944
GOTERM_MF_FAT	GO:0005351~sugar:hydrogen symporter activity	6	1.45985	0.0325462	AT1G75220, AT2G48020, AT1G11260, AT5G27350, AT1G77210, AT1G08920	252	99	14015	3.37061	0.999978	0.738167	36.0671
GOTERM_MF_FAT	GO:0005402~cation:sugar symporter activity	6	1.45985	0.0325462	AT1G75220, AT2G48020, AT1G11260, AT5G27350, AT1G77210, AT1G08920	252	99	14015	3.37061	0.999978	0.738167	36.0671
GOTERM_MF_FAT	GO:0015295~solute:hydrogen symporter activity	6	1.45985	0.0325462	AT1G75220, AT2G48020, AT1G11260, AT5G27350, AT1G77210, AT1G08920	252	99	14015	3.37061	0.999978	0.738167	36.0671
GOTERM_MF_FAT	GO:0051119~sugar transmembrane transporter activity	6	1.45985	0.0461697	AT1G75220, AT2G48020, AT1G11260, AT5G27350, AT1G77210, AT1G08920	252	109	14015	3.06138	1	0.817627	47.2218
GOTERM_MF_FAT	GO:0015294~solute:cation symporter activity	6	1.45985	0.0760787	AT1G75220, AT2G48020, AT1G11260, AT5G27350, AT1G77210, AT1G08920	252	126	14015	2.64834	1	0.902771	65.6922
GOTERM_MF_FAT	GO:0015293~symporter activity	6	1.45985	0.121832	AT1G75220, AT2G48020, AT1G11260, AT5G27350, AT1G77210, AT1G08920	252	146	14015	2.28555	1	0.939567	82.7345
GOTERM_BP_FAT	GO:0055085~transmembrane transport	6	1.45985	0.251739	AT1G75220, AT2G48020, AT1G11260, AT5G27350, AT1G77210, AT1G08920	227	198	13187	1.76038	1	0.920858	98.6476
Annotation Cluster 11	Enrichment Score: 1.4818945668721897
Category	Term	Count	%	PValue	Genes	List Total	Pop Hits	Pop Total	Fold Enrichment	Bonferroni	Benjamini	FDR
GOTERM_BP_FAT	GO:0045491~xylan metabolic process	3	0.729927	0.0145251	AT2G28110, AT5G64570, AT3G10740	227	11	13187	15.8434	0.999887	0.380117	19.5163
GOTERM_BP_FAT	GO:0010410~hemicellulose metabolic process	3	0.729927	0.0145251	AT2G28110, AT5G64570, AT3G10740	227	11	13187	15.8434	0.999887	0.380117	19.5163
GOTERM_BP_FAT	GO:0010383~cell wall polysaccharide metabolic process	3	0.729927	0.0265125	AT2G28110, AT5G64570, AT3G10740	227	15	13187	11.6185	1	0.473649	32.8823
GOTERM_BP_FAT	GO:0044036~cell wall macromolecule metabolic process	3	0.729927	0.211218	AT2G28110, AT5G64570, AT3G10740	227	50	13187	3.48555	1	0.907123	97.0422
Annotation Cluster 12	Enrichment Score: 1.468148782049173
Category	Term	Count	%	PValue	Genes	List Total	Pop Hits	Pop Total	Fold Enrichment	Bonferroni	Benjamini	FDR
SP_PIR_KEYWORDS	cytoplasmic vesicle	5	1.21655	0.00994678	AT1G68110, AT2G45170, AT4G16520, AT1G03550, AT3G15580	407	54	26059	5.92843	0.844228	0.143539	11.6449
GOTERM_CC_FAT	GO:0031410~cytoplasmic vesicle	5	1.21655	0.0611002	AT1G68110, AT2G45170, AT4G16520, AT1G03550, AT3G15580	204	98	13438	3.36084	0.999799	0.573067	52.2475
GOTERM_CC_FAT	GO:0031982~vesicle	5	1.21655	0.0648378	AT1G68110, AT2G45170, AT4G16520, AT1G03550, AT3G15580	204	100	13438	3.29363	0.999883	0.560759	54.4292
Annotation Cluster 13	Enrichment Score: 1.465393599606516
Category	Term	Count	%	PValue	Genes	List Total	Pop Hits	Pop Total	Fold Enrichment	Bonferroni	Benjamini	FDR
SMART	SM00225:BTB	5	1.21655	0.0237819	AT3G48360, AT5G45110, AT2G24240, AT4G37610, AT2G30600	119	71	7639	4.52065	0.810009	0.282624	21.9923
INTERPRO	IPR000210:BTB/POZ-like	5	1.21655	0.0318765	AT3G48360, AT5G45110, AT2G24240, AT4G37610, AT2G30600	348	71	20592	4.16707	1	0.648223	37.4107
INTERPRO	IPR013069:BTB/POZ	4	0.973236	0.0377982	AT3G48360, AT5G45110, AT4G37610, AT2G30600	348	44	20592	5.37931	1	0.668643	42.7259
INTERPRO	IPR011333:BTB/POZ fold	5	1.21655	0.0479997	AT3G48360, AT5G45110, AT2G24240, AT4G37610, AT2G30600	348	81	20592	3.65262	1	0.737077	50.9088
Annotation Cluster 14	Enrichment Score: 1.447258294488825
Category	Term	Count	%	PValue	Genes	List Total	Pop Hits	Pop Total	Fold Enrichment	Bonferroni	Benjamini	FDR
SP_PIR_KEYWORDS	photoreceptor protein	3	0.729927	0.0222365	AT2G02710, AT4G08920, AT1G04400	407	15	26059	12.8054	0.984742	0.23004	24.3085
GOTERM_MF_FAT	GO:0009881~photoreceptor activity	3	0.729927	0.0287713	AT2G02710, AT4G08920, AT1G04400	252	15	14015	11.123	0.999922	0.74108	32.6109
SP_PIR_KEYWORDS	sensory transduction	3	0.729927	0.0314252	AT2G02710, AT4G08920, AT1G04400	407	18	26059	10.6712	0.997365	0.281032	32.6619
SP_PIR_KEYWORDS	chromophore	3	0.729927	0.0493942	AT2G02710, AT4G08920, AT1G04400	407	23	26059	8.35135	0.999919	0.375684	46.6005
GOTERM_BP_FAT	GO:0018298~protein-chromophore linkage	3	0.729927	0.0584424	AT2G02710, AT4G08920, AT1G04400	227	23	13187	7.57728	1	0.678007	59.0815
Annotation Cluster 15	Enrichment Score: 1.370709547283542
Category	Term	Count	%	PValue	Genes	List Total	Pop Hits	Pop Total	Fold Enrichment	Bonferroni	Benjamini	FDR
GOTERM_BP_FAT	GO:0019751~polyol metabolic process	4	0.973236	0.0288667	AT2G19800, AT3G02040, AT5G41080, AT1G80460	227	39	13187	5.95821	1	0.490184	35.2509
GOTERM_BP_FAT	GO:0006071~glycerol metabolic process	3	0.729927	0.0495961	AT3G02040, AT5G41080, AT1G80460	227	21	13187	8.29893	1	0.663542	52.9906
GOTERM_BP_FAT	GO:0019400~alditol metabolic process	3	0.729927	0.0539543	AT3G02040, AT5G41080, AT1G80460	227	22	13187	7.92171	1	0.670796	56.0898

## Sheet: Repressed_Clusters
SUPPLEMENTARY TABLE 6B. FUNCTIONAL ANNOTATION CLUSTERING (DAVID - Huang et al., 2009) FOR THE STARVATION-REPRESSED GENES MISREGULATED IN dcl1-9 .
	Only clusters with enrichment scores above 1.3 are shown.
Annotation Cluster 1	Enrichment Score: 67.15997892701348
Category	Term	Count	%	PValue	Genes	List Total	Pop Hits	Pop Total	Fold Enrichment	Bonferroni	Benjamini	FDR
SP_PIR_KEYWORDS	ribosomal protein	93	22.1429	2.31533e-88	AT2G41840, AT1G74060, AT5G64650, AT5G04800, AT5G20160, AT3G09500, AT5G23900, AT5G16130, AT5G02450, AT3G44590, AT3G60245, AT3G53890, AT5G23740, AT2G44120, AT2G17360, AT2G21580, AT4G18100, AT2G32060, AT3G11120, AT3G23390, AT1G80750, AT2G27530, AT3G04840, AT4G10450, AT5G59850, AT5G15200, AT5G27770, AT5G60670, AT4G26230, AT3G02080, AT5G48760, AT2G40590, AT1G22780, AT3G03600, AT3G22300, AT5G02610, AT1…	417	331	26059	17.5581	4.74643e-86	4.74643e-86	2.91376e-85
SP_PIR_KEYWORDS	ribonucleoprotein	94	22.381	1.08959e-85	AT2G41840, AT1G74060, AT5G64650, AT5G04800, AT3G09500, AT5G23900, AT5G16130, AT5G02450, AT3G44590, AT3G60245, AT3G53890, AT5G23740, AT2G44120, AT2G17360, AT2G21580, AT4G18100, AT2G32060, AT3G11120, AT4G30220, AT3G23390, AT1G80750, AT2G27530, AT3G04840, AT4G10450, AT5G59850, AT5G15200, AT5G27770, AT5G60670, AT4G26230, AT3G02080, AT5G48760, AT2G40590, AT4G25630, AT1G22780, AT3G03600, AT3G22300, AT5…	417	363	26059	16.1824	2.23365e-83	1.11683e-83	1.3712e-82
GOTERM_MF_FAT	GO:0003735~structural constituent of ribosome	96	22.8571	1.08694e-78	AT2G41840, AT1G74060, AT5G64650, AT5G04800, AT3G09500, AT5G23900, AT4G23620, AT5G16130, AT5G02450, AT3G44590, AT3G60245, AT3G53890, AT5G23740, AT2G44120, AT2G17360, AT2G21580, AT4G18100, AT2G32060, AT3G11120, AT3G23390, AT1G80750, AT2G27530, AT3G04840, AT4G10450, AT5G59850, AT5G15200, AT5G27770, AT5G60670, AT4G26230, AT3G02080, AT5G48760, AT2G40590, AT1G22780, AT3G03600, AT3G22300, AT5G02610, AT3…	300	366	14015	12.2536	3.95646e-76	3.95646e-76	1.49525e-75
GOTERM_CC_FAT	GO:0005840~ribosome	102	24.2857	4.5336e-74	AT2G41840, AT5G20160, AT3G09500, AT5G23900, AT4G23620, AT5G02450, AT3G44590, AT3G60245, AT3G53890, AT2G44120, AT2G21580, AT2G32060, AT3G11120, AT1G80750, AT3G23390, AT5G59850, AT4G10450, AT5G60670, AT3G02080, AT2G40590, AT1G04480, AT3G48930, AT2G45710, AT3G24830, AT3G05560, AT5G47700, AT4G14320, AT1G01100, AT2G37190, AT1G48630, AT4G17390, AT3G17465, AT5G20180, AT3G07110, AT1G25260, AT4G31985, AT3…	316	438	13438	9.90316	6.93641e-72	6.93641e-72	5.43242e-71
GOTERM_CC_FAT	GO:0022626~cytosolic ribosome	90	21.4286	4.8656e-74	AT2G41840, AT1G74060, AT3G09500, AT5G23900, AT5G16130, AT5G02450, AT3G44590, AT3G60245, AT3G53890, AT5G23740, AT2G44120, AT2G17360, AT2G21580, AT4G18100, AT2G32060, AT3G11120, AT3G23390, AT2G27530, AT1G80750, AT3G04840, AT4G10450, AT5G59850, AT5G15200, AT5G27770, AT5G60670, AT4G26230, AT3G02080, AT5G48760, AT2G40590, AT2G28000, AT1G22780, AT5G02610, AT1G77940, AT1G04480, AT3G48930, AT2G19730, AT2…	316	309	13438	12.386	7.44437e-72	3.72218e-72	5.83023e-71
GOTERM_CC_FAT	GO:0033279~ribosomal subunit	82	19.5238	8.48014e-68	AT2G41840, AT1G74060, AT3G09500, AT5G23900, AT5G16130, AT5G02450, AT3G60245, AT3G53890, AT5G23740, AT2G44120, AT2G17360, AT2G21580, AT4G18100, AT2G32060, AT3G11120, AT3G23390, AT1G80750, AT2G27530, AT3G04840, AT4G10450, AT5G59850, AT5G15200, AT5G27770, AT5G60670, AT4G26230, AT3G02080, AT5G48760, AT2G40590, AT1G22780, AT3G03600, AT3G22300, AT5G02610, AT3G01790, AT1G77940, AT1G04480, AT3G48930, AT2…	316	276	13438	12.6343	1.29746e-65	4.32487e-66	1.01614e-64
GOTERM_CC_FAT	GO:0044445~cytosolic part	80	19.0476	6.01955e-67	AT2G41840, AT1G74060, AT3G09500, AT5G23900, AT1G20950, AT5G16130, AT5G02450, AT3G60245, AT3G53890, AT5G23740, AT2G44120, AT2G17360, AT2G21580, AT2G43100, AT4G18100, AT2G32060, AT3G11120, AT3G23390, AT1G80750, AT2G27530, AT3G04840, AT4G10450, AT5G59850, AT5G15200, AT5G27770, AT5G60670, AT4G26230, AT3G02080, AT5G48760, AT2G40590, AT1G22780, AT5G02610, AT1G77940, AT1G04480, AT3G48930, AT2G25210, AT2…	316	263	13438	12.9355	9.20991e-65	2.30248e-65	7.21296e-64
GOTERM_MF_FAT	GO:0005198~structural molecule activity	98	23.3333	1.23191e-66	AT2G41840, AT3G09500, AT5G23900, AT4G23620, AT5G02450, AT3G44590, AT3G60245, AT3G53890, AT2G44120, AT2G21580, AT2G32060, AT3G11120, AT1G80750, AT3G23390, AT5G59850, AT4G10450, AT5G60670, AT3G02080, AT2G40590, AT1G04480, AT3G48930, AT2G45710, AT3G24830, AT3G05560, AT5G47700, AT4G14320, AT1G01100, AT2G37190, AT4G17390, AT3G17465, AT5G20180, AT3G07110, AT1G25260, AT4G31985, AT3G05590, AT5G53070, AT3…	300	509	14015	8.99456	4.48414e-64	2.24207e-64	1.69468e-63
GOTERM_CC_FAT	GO:0030529~ribonucleoprotein complex	107	25.4762	1.13192e-62	AT2G41840, AT5G20160, AT3G09500, AT5G23900, AT4G23620, AT5G02450, AT3G44590, AT3G60245, AT3G53890, AT2G44120, AT2G21580, AT2G32060, AT3G11120, AT4G30220, AT1G80750, AT3G23390, AT5G59850, AT4G10450, AT5G60670, AT3G02080, AT2G40590, AT4G25630, AT1G04480, AT3G48930, AT2G45710, AT3G24830, AT3G05560, AT5G47700, AT4G14320, AT1G01100, AT3G60360, AT2G37190, AT4G17390, AT1G48630, AT3G17465, AT4G30330, AT5…	316	636	13438	7.15442	1.73184e-60	3.46369e-61	1.35633e-59
GOTERM_BP_FAT	GO:0006412~translation	99	23.5714	1.58135e-57	AT2G41840, AT3G09500, AT5G23900, AT4G23620, AT5G02450, AT3G44590, AT3G60245, AT3G53890, AT2G44120, AT2G21580, AT2G32060, AT3G11120, AT1G80750, AT3G23390, AT5G59850, AT4G10450, AT5G60670, AT3G02080, AT2G40590, AT1G04480, AT3G48930, AT2G45710, AT3G24830, AT3G05560, AT5G47700, AT4G14320, AT1G01100, AT2G37190, AT4G17390, AT3G17465, AT5G20180, AT3G07110, AT1G25260, AT4G31985, AT3G05590, AT5G53070, AT3…	290	635	13187	7.0894	1.25876e-54	1.25876e-54	2.42578e-54
GOTERM_CC_FAT	GO:0043232~intracellular non-membrane-bounded organelle	116	27.619	4.2034e-46	AT2G41840, AT5G20160, AT3G09500, AT5G23900, AT4G23620, AT1G18850, AT5G02450, AT3G44590, AT3G60245, AT3G53890, AT2G44120, AT2G21580, AT2G32060, AT3G11120, AT4G30220, AT3G23390, AT1G80750, AT5G59850, AT4G10450, AT5G60670, AT3G02080, AT2G40590, AT1G14410, AT4G25630, AT1G04480, AT3G48930, AT2G45710, AT3G24830, AT3G05560, AT5G47700, AT4G14320, AT1G01100, AT3G60360, AT2G37190, AT4G17390, AT1G48630, AT3…	316	1109	13438	4.44809	6.4312e-44	9.18743e-45	5.03675e-43
GOTERM_CC_FAT	GO:0043228~non-membrane-bounded organelle	116	27.619	4.2034e-46	AT2G41840, AT5G20160, AT3G09500, AT5G23900, AT4G23620, AT1G18850, AT5G02450, AT3G44590, AT3G60245, AT3G53890, AT2G44120, AT2G21580, AT2G32060, AT3G11120, AT4G30220, AT3G23390, AT1G80750, AT5G59850, AT4G10450, AT5G60670, AT3G02080, AT2G40590, AT1G14410, AT4G25630, AT1G04480, AT3G48930, AT2G45710, AT3G24830, AT3G05560, AT5G47700, AT4G14320, AT1G01100, AT3G60360, AT2G37190, AT4G17390, AT1G48630, AT3…	316	1109	13438	4.44809	6.4312e-44	9.18743e-45	5.03675e-43
Annotation Cluster 2	Enrichment Score: 20.61770467536669
Category	Term	Count	%	PValue	Genes	List Total	Pop Hits	Pop Total	Fold Enrichment	Bonferroni	Benjamini	FDR
GOTERM_CC_FAT	GO:0031974~membrane-enclosed lumen	64	15.2381	4.11878e-22	AT3G15020, AT2G41840, AT1G74060, AT3G52930, AT5G20160, AT3G09500, AT5G40770, AT1G77510, AT1G18850, AT5G16130, AT1G50920, AT5G03160, AT1G80720, AT2G44120, AT4G18100, AT5G02590, AT1G22840, AT4G30220, AT1G80750, AT1G26470, AT3G46560, AT5G15200, AT5G27770, AT2G27840, AT2G41600, AT4G25630, AT2G39795, AT3G03600, AT1G22780, AT3G22300, AT1G04480, AT4G20440, AT2G47470, AT2G45710, AT3G05560, AT5G41010, AT1…	316	665	13438	4.09266	6.30174e-20	5.72886e-21	4.93536e-19
GOTERM_CC_FAT	GO:0070013~intracellular organelle lumen	62	14.7619	5.83524e-21	AT3G15020, AT1G74060, AT2G41840, AT3G52930, AT5G20160, AT3G09500, AT5G40770, AT1G77510, AT1G18850, AT5G16130, AT1G50920, AT5G03160, AT1G80720, AT2G44120, AT4G18100, AT5G02590, AT1G22840, AT4G30220, AT1G80750, AT1G26470, AT5G15200, AT5G27770, AT2G27840, AT2G41600, AT4G25630, AT2G39795, AT3G03600, AT1G22780, AT3G22300, AT4G20440, AT1G04480, AT2G47470, AT2G45710, AT3G05560, AT5G41010, AT1G09690, AT3…	316	657	13438	4.01304	8.92791e-19	6.86762e-20	6.99211e-18
GOTERM_CC_FAT	GO:0043233~organelle lumen	62	14.7619	5.83524e-21	AT3G15020, AT1G74060, AT2G41840, AT3G52930, AT5G20160, AT3G09500, AT5G40770, AT1G77510, AT1G18850, AT5G16130, AT1G50920, AT5G03160, AT1G80720, AT2G44120, AT4G18100, AT5G02590, AT1G22840, AT4G30220, AT1G80750, AT1G26470, AT5G15200, AT5G27770, AT2G27840, AT2G41600, AT4G25630, AT2G39795, AT3G03600, AT1G22780, AT3G22300, AT4G20440, AT1G04480, AT2G47470, AT2G45710, AT3G05560, AT5G41010, AT1G09690, AT3…	316	657	13438	4.01304	8.92791e-19	6.86762e-20	6.99211e-18
Annotation Cluster 3	Enrichment Score: 3.815291480447543
Category	Term	Count	%	PValue	Genes	List Total	Pop Hits	Pop Total	Fold Enrichment	Bonferroni	Benjamini	FDR
SP_PIR_KEYWORDS	chloroplast	29	6.90476	1.01341e-05	AT2G37250, AT4G08390, AT4G37000, AT1G63970, AT4G11010, AT4G39940, AT3G17465, AT1G17745, AT3G55010, AT1G31860, AT3G25780, AT4G39120, AT1G63940, AT5G51820, AT3G20330, AT2G04400, AT3G14390, AT1G55490, AT4G19710, AT2G28000, AT1G19920, AT1G31180, AT3G21110, AT2G15620, AT3G21580, AT3G52380, AT3G52960, AT1G74260, AT2G29760	417	702	26059	2.58156	0.00207535	0.000207729	0.0127526
SP_PIR_KEYWORDS	plastid	28	6.66667	1.44919e-05	AT2G37250, AT4G08390, AT4G37000, AT1G63970, AT4G11010, AT4G39940, AT3G17465, AT1G17745, AT3G55010, AT1G31860, AT3G25780, AT4G39120, AT1G63940, AT5G51820, AT3G20330, AT2G04400, AT3G14390, AT1G55490, AT4G19710, AT2G28000, AT1G19920, AT1G31180, AT3G21110, AT2G15620, AT3G21580, AT3G52960, AT1G74260, AT2G29760	417	677	26059	2.58459	0.00296646	0.000270042	0.018236
UP_SEQ_FEATURE	transit peptide:Chloroplast	25	5.95238	0.0243901	AT2G37250, AT4G37000, AT1G63970, AT4G39940, AT3G17465, AT1G17745, AT3G55010, AT1G31860, AT3G25780, AT4G39120, AT1G63940, AT5G51820, AT3G20330, AT2G04400, AT3G14390, AT1G55490, AT4G19710, AT2G28000, AT1G31180, AT3G21110, AT2G15620, AT3G21580, AT3G52960, AT1G74260, AT2G29760	218	623	8602	1.58342	0.999979	0.697663	29.4416
Annotation Cluster 4	Enrichment Score: 3.4442769650953364
Category	Term	Count	%	PValue	Genes	List Total	Pop Hits	Pop Total	Fold Enrichment	Bonferroni	Benjamini	FDR
GOTERM_BP_FAT	GO:0008652~cellular amino acid biosynthetic process	15	3.57143	4.80203e-05	AT2G37250, AT2G36880, AT3G03780, AT2G04400, AT4G39940, AT1G17745, AT3G14390, AT4G19710, AT3G57560, AT1G31860, AT1G14810, AT4G34200, AT1G31180, AT2G17630, AT2G43100	290	182	13187	3.74773	0.0375037	0.00761587	0.0736375
GOTERM_BP_FAT	GO:0009309~amine biosynthetic process	15	3.57143	0.000147414	AT2G37250, AT2G36880, AT3G03780, AT2G04400, AT4G39940, AT1G17745, AT3G14390, AT4G19710, AT3G57560, AT1G31860, AT1G14810, AT4G34200, AT1G31180, AT2G17630, AT2G43100	290	202	13187	3.37666	0.110726	0.0166246	0.225894
GOTERM_BP_FAT	GO:0046394~carboxylic acid biosynthetic process	20	4.7619	0.00153626	AT5G55120, AT2G37250, AT2G36880, AT3G03780, AT2G45790, AT2G04400, AT4G39940, AT1G17745, AT3G14390, AT4G19710, AT3G57560, AT2G20610, AT1G31860, AT1G14810, AT4G34200, AT1G31180, AT2G17630, AT5G47630, AT2G43100, AT3G25780	290	405	13187	2.24555	0.70589	0.0898433	2.33083
GOTERM_BP_FAT	GO:0016053~organic acid biosynthetic process	20	4.7619	0.00153626	AT5G55120, AT2G37250, AT2G36880, AT3G03780, AT2G45790, AT2G04400, AT4G39940, AT1G17745, AT3G14390, AT4G19710, AT3G57560, AT2G20610, AT1G31860, AT1G14810, AT4G34200, AT1G31180, AT2G17630, AT5G47630, AT2G43100, AT3G25780	290	405	13187	2.24555	0.70589	0.0898433	2.33083
Annotation Cluster 5	Enrichment Score: 3.067050749745603
Category	Term	Count	%	PValue	Genes	List Total	Pop Hits	Pop Total	Fold Enrichment	Bonferroni	Benjamini	FDR
INTERPRO	IPR005822:Ribosomal protein L13	4	0.952381	0.000109664	AT3G07110, AT3G01790, AT3G24830, AT5G48760	370	6	20592	37.1027	0.0645051	0.0219814	0.162137
PIR_SUPERFAMILY	PIRSF002181:Ribosomal_L13	4	0.952381	0.00037492	AT3G07110, AT3G01790, AT3G24830, AT5G48760	230	6	8411	24.3797	0.0846948	0.0846948	0.481566
INTERPRO	IPR005755:Ribosomal protein L13, eukaryotic/archaeal	3	0.714286	0.00187618	AT3G07110, AT3G24830, AT5G48760	370	4	20592	41.7405	0.680752	0.173287	2.74036
PIR_SUPERFAMILY	PIRSF002181:ribosomal protein, L13p/L13Aa/L16e/organellar L13 types	3	0.714286	0.00699066	AT3G07110, AT3G24830, AT5G48760	230	5	8411	21.9417	0.809021	0.338931	8.63499
Annotation Cluster 6	Enrichment Score: 2.6619379269866426
Category	Term	Count	%	PValue	Genes	List Total	Pop Hits	Pop Total	Fold Enrichment	Bonferroni	Benjamini	FDR
GOTERM_MF_FAT	GO:0022884~macromolecule transmembrane transporter activity	8	1.90476	9.70983e-05	AT3G20000, AT1G29310, AT4G26670, AT3G27080, AT3G46560, AT5G50460, AT5G50810, AT3G25120	300	51	14015	7.3281	0.0347281	0.0058736	0.133491
GOTERM_MF_FAT	GO:0015450~P-P-bond-hydrolysis-driven protein transmembrane transporter activity	8	1.90476	9.70983e-05	AT3G20000, AT1G29310, AT4G26670, AT3G27080, AT3G46560, AT5G50460, AT5G50810, AT3G25120	300	51	14015	7.3281	0.0347281	0.0058736	0.133491
GOTERM_MF_FAT	GO:0008320~protein transmembrane transporter activity	8	1.90476	0.000305081	AT3G20000, AT1G29310, AT4G26670, AT3G27080, AT3G46560, AT5G50460, AT5G50810, AT3G25120	300	61	14015	6.12678	0.105121	0.0157414	0.41887
GOTERM_MF_FAT	GO:0008565~protein transporter activity	10	2.38095	0.00243025	AT3G20000, AT1G29310, AT2G35190, AT4G26670, AT3G27080, AT3G46560, AT5G50460, AT5G50810, AT3G25120, AT2G46520	300	135	14015	3.46049	0.587569	0.104803	3.29184
GOTERM_MF_FAT	GO:0015405~P-P-bond-hydrolysis-driven transmembrane transporter activity	9	2.14286	0.121955	AT3G20000, AT1G29310, AT4G26670, AT3G21250, AT3G27080, AT3G46560, AT5G50460, AT5G50810, AT3G25120	300	231	14015	1.82013	1	0.872328	83.2895
GOTERM_MF_FAT	GO:0015399~primary active transmembrane transporter activity	9	2.14286	0.125223	AT3G20000, AT1G29310, AT4G26670, AT3G21250, AT3G27080, AT3G46560, AT5G50460, AT5G50810, AT3G25120	300	232	14015	1.81228	1	0.868545	84.1251
Annotation Cluster 7	Enrichment Score: 2.4350502490262866
Category	Term	Count	%	PValue	Genes	List Total	Pop Hits	Pop Total	Fold Enrichment	Bonferroni	Benjamini	FDR
INTERPRO	IPR000850:Adenylate kinase	4	0.952381	0.000846256	AT3G01820, AT2G37250, AT3G09820, AT5G50370	370	11	20592	20.2378	0.402345	0.0978263	1.24484
GOTERM_MF_FAT	GO:0019201~nucleotide kinase activity	4	0.952381	0.00361588	AT3G01820, AT2G37250, AT3G09820, AT5G50370	300	15	14015	12.4578	0.732481	0.136281	4.86108
GOTERM_MF_FAT	GO:0004017~adenylate kinase activity	3	0.714286	0.00434734	AT2G37250, AT3G09820, AT5G50370	300	5	14015	28.03	0.795233	0.146652	5.81739
INTERPRO	IPR006259:Adenylate kinase, subfamily	3	0.714286	0.00458004	AT2G37250, AT3G09820, AT5G50370	370	6	20592	27.827	0.938644	0.26664	6.56667
GOTERM_MF_FAT	GO:0016776~phosphotransferase activity, phosphate group as acceptor	4	0.952381	0.0109633	AT2G37250, AT4G11010, AT3G09820, AT5G50370	300	22	14015	8.49394	0.981915	0.305656	14.071
Annotation Cluster 8	Enrichment Score: 2.3420673409029362
Category	Term	Count	%	PValue	Genes	List Total	Pop Hits	Pop Total	Fold Enrichment	Bonferroni	Benjamini	FDR
INTERPRO	IPR005788:Disulphide isomerase	4	0.952381	0.000189361	AT1G21750, AT2G47470, AT1G04980, AT1G77510	370	7	20592	31.8023	0.108761	0.0283752	0.279813
GOTERM_BP_FAT	GO:0034976~response to endoplasmic reticulum stress	5	1.19048	0.00019013	AT2G02810, AT1G21750, AT2G47470, AT1G04980, AT1G77510	290	14	13187	16.2401	0.14046	0.0187419	0.291261
UP_SEQ_FEATURE	domain:Thioredoxin 2	3	0.714286	0.0018689	AT1G21750, AT2G47470, AT1G77510	218	3	8602	39.4587	0.557628	0.33489	2.60731
UP_SEQ_FEATURE	site:Lowers pKa of C-terminal Cys of second active site	3	0.714286	0.0018689	AT1G21750, AT2G47470, AT1G77510	218	3	8602	39.4587	0.557628	0.33489	2.60731
UP_SEQ_FEATURE	domain:Thioredoxin 1	3	0.714286	0.0018689	AT1G21750, AT2G47470, AT1G77510	218	3	8602	39.4587	0.557628	0.33489	2.60731
UP_SEQ_FEATURE	site:Lowers pKa of C-terminal Cys of first active site	3	0.714286	0.0018689	AT1G21750, AT2G47470, AT1G77510	218	3	8602	39.4587	0.557628	0.33489	2.60731
GOTERM_MF_FAT	GO:0003756~protein disulfide isomerase activity	4	0.952381	0.00361588	AT1G21750, AT2G47470, AT1G04980, AT1G77510	300	15	14015	12.4578	0.732481	0.136281	4.86108
GOTERM_MF_FAT	GO:0016864~intramolecular oxidoreductase activity, transposing S-S bonds	4	0.952381	0.00361588	AT1G21750, AT2G47470, AT1G04980, AT1G77510	300	15	14015	12.4578	0.732481	0.136281	4.86108
GOTERM_MF_FAT	GO:0016862~intramolecular oxidoreductase activity, interconverting keto- and enol-groups	4	0.952381	0.00361588	AT1G21750, AT2G47470, AT1G04980, AT1G77510	300	15	14015	12.4578	0.732481	0.136281	4.86108
INTERPRO	IPR006662:Thioredoxin-like subdomain	4	0.952381	0.00979918	AT1G21750, AT2G47470, AT1G04980, AT1G77510	370	25	20592	8.90465	0.99749	0.419751	13.5586
GOTERM_MF_FAT	GO:0016860~intramolecular oxidoreductase activity	5	1.19048	0.0120214	AT1G21750, AT2G47470, AT1G04980, AT3G25780, AT1G77510	300	42	14015	5.56151	0.987751	0.307092	15.3271
PIR_SUPERFAMILY	PIRSF001487:protein disulfide-isomerase	3	0.714286	0.018545	AT1G21750, AT2G47470, AT1G77510	230	8	8411	13.7136	0.987938	0.586684	21.4138
UP_SEQ_FEATURE	site:Contributes to redox potential value	3	0.714286	0.0249463	AT1G21750, AT2G47470, AT1G77510	218	10	8602	11.8376	0.999984	0.667613	30.0075
INTERPRO	IPR013766:Thioredoxin domain	5	1.19048	0.0277828	AT1G21750, AT1G53300, AT2G47470, AT1G04980, AT1G77510	370	64	20592	4.34797	1	0.680841	34.0908
INTERPRO	IPR017937:Thioredoxin, conserved site	4	0.952381	0.0303211	AT1G21750, AT2G47470, AT1G04980, AT1G77510	370	38	20592	5.85832	1	0.66753	36.5916
INTERPRO	IPR017936:Thioredoxin-like	5	1.19048	0.0352935	AT1G21750, AT2G47470, AT1G04980, AT3G52960, AT1G77510	370	69	20592	4.0329	1	0.702898	41.236
Annotation Cluster 9	Enrichment Score: 2.1295449355126332
Category	Term	Count	%	PValue	Genes	List Total	Pop Hits	Pop Total	Fold Enrichment	Bonferroni	Benjamini	FDR
GOTERM_CC_FAT	GO:0005743~mitochondrial inner membrane	12	2.85714	0.00244921	AT3G20000, AT4G32400, AT2G22500, AT5G23300, AT5G13490, AT4G26670, AT4G11010, AT3G27080, AT3G46560, AT1G08220, AT5G50810, AT3G25120	316	172	13438	2.96688	0.312841	0.0143267	2.89563
GOTERM_CC_FAT	GO:0005740~mitochondrial envelope	13	3.09524	0.00706239	AT3G20000, AT2G22500, AT3G52930, AT4G11010, AT3G27080, AT3G46560, AT1G08220, AT5G50810, AT4G32400, AT5G23300, AT5G13490, AT4G26670, AT3G25120	316	226	13438	2.44615	0.661888	0.0393664	8.14195
GOTERM_CC_FAT	GO:0031966~mitochondrial membrane	12	2.85714	0.0114825	AT3G20000, AT4G32400, AT2G22500, AT5G23300, AT5G13490, AT4G26670, AT4G11010, AT3G27080, AT3G46560, AT1G08220, AT5G50810, AT3G25120	316	212	13438	2.40709	0.829154	0.052137	12.9238
GOTERM_CC_FAT	GO:0019866~organelle inner membrane	12	2.85714	0.0152688	AT3G20000, AT4G32400, AT2G22500, AT5G23300, AT5G13490, AT4G26670, AT4G11010, AT3G27080, AT3G46560, AT1G08220, AT5G50810, AT3G25120	316	221	13438	2.30907	0.905025	0.0633005	16.8372
Annotation Cluster 10	Enrichment Score: 2.0567085552616304
Category	Term	Count	%	PValue	Genes	List Total	Pop Hits	Pop Total	Fold Enrichment	Bonferroni	Benjamini	FDR
UP_SEQ_FEATURE	domain:S4 RNA-binding	4	0.952381	0.00294332	AT5G15200, AT3G19440, AT2G17360, AT5G58420	218	12	8602	13.1529	0.723399	0.274791	4.07749
SMART	SM00363:S4	3	0.714286	0.00908419	AT5G15200, AT2G17360, AT5G58420	81	14	7639	20.209	0.383478	0.383478	8.51863
INTERPRO	IPR002942:RNA-binding S4	3	0.714286	0.0252785	AT5G15200, AT2G17360, AT5G58420	370	14	20592	11.9259	1	0.671074	31.5338
Annotation Cluster 11	Enrichment Score: 1.8815340340869227
Category	Term	Count	%	PValue	Genes	List Total	Pop Hits	Pop Total	Fold Enrichment	Bonferroni	Benjamini	FDR
GOTERM_BP_FAT	GO:0009156~ribonucleoside monophosphate biosynthetic process	5	1.19048	0.00143972	AT3G55010, AT5G23300, AT2G37690, AT1G74260, AT1G16350	290	23	13187	9.88531	0.682363	0.0911457	2.18587
GOTERM_BP_FAT	GO:0009161~ribonucleoside monophosphate metabolic process	5	1.19048	0.00169818	AT3G55010, AT5G23300, AT2G37690, AT1G74260, AT1G16350	290	24	13187	9.47342	0.741511	0.0921135	2.57352
GOTERM_BP_FAT	GO:0009124~nucleoside monophosphate biosynthetic process	5	1.19048	0.0034834	AT3G55010, AT5G23300, AT2G37690, AT1G74260, AT1G16350	290	29	13187	7.84007	0.937814	0.159368	5.21209
GOTERM_BP_FAT	GO:0009123~nucleoside monophosphate metabolic process	5	1.19048	0.00395102	AT3G55010, AT5G23300, AT2G37690, AT1G74260, AT1G16350	290	30	13187	7.57874	0.957201	0.169201	5.89212
GOTERM_BP_FAT	GO:0009168~purine ribonucleoside monophosphate biosynthetic process	4	0.952381	0.00472066	AT3G55010, AT2G37690, AT1G74260, AT1G16350	290	16	13187	11.3681	0.976868	0.188809	7.00142
GOTERM_BP_FAT	GO:0009167~purine ribonucleoside monophosphate metabolic process	4	0.952381	0.00472066	AT3G55010, AT2G37690, AT1G74260, AT1G16350	290	16	13187	11.3681	0.976868	0.188809	7.00142
GOTERM_BP_FAT	GO:0009127~purine nucleoside monophosphate biosynthetic process	4	0.952381	0.00472066	AT3G55010, AT2G37690, AT1G74260, AT1G16350	290	16	13187	11.3681	0.976868	0.188809	7.00142
GOTERM_BP_FAT	GO:0009126~purine nucleoside monophosphate metabolic process	4	0.952381	0.00472066	AT3G55010, AT2G37690, AT1G74260, AT1G16350	290	16	13187	11.3681	0.976868	0.188809	7.00142
GOTERM_BP_FAT	GO:0006189~'de novo' IMP biosynthetic process	3	0.714286	0.00934594	AT3G55010, AT2G37690, AT1G74260	290	7	13187	19.4882	0.999433	0.249845	13.4147
GOTERM_BP_FAT	GO:0046040~IMP metabolic process	3	0.714286	0.0191769	AT3G55010, AT2G37690, AT1G74260	290	10	13187	13.6417	1	0.382242	25.6978
GOTERM_BP_FAT	GO:0006188~IMP biosynthetic process	3	0.714286	0.0191769	AT3G55010, AT2G37690, AT1G74260	290	10	13187	13.6417	1	0.382242	25.6978
GOTERM_BP_FAT	GO:0006164~purine nucleotide biosynthetic process	6	1.42857	0.126897	AT3G55010, AT3G21110, AT4G11010, AT2G37690, AT1G74260, AT1G16350	290	121	13187	2.25483	1	0.800555	87.5276
GOTERM_BP_FAT	GO:0006163~purine nucleotide metabolic process	6	1.42857	0.136637	AT3G55010, AT3G21110, AT4G11010, AT2G37690, AT1G74260, AT1G16350	290	124	13187	2.20028	1	0.816383	89.4994
GOTERM_BP_FAT	GO:0009152~purine ribonucleotide biosynthetic process	5	1.19048	0.245134	AT3G55010, AT4G11010, AT2G37690, AT1G74260, AT1G16350	290	115	13187	1.97706	1	0.914553	98.6618
GOTERM_BP_FAT	GO:0009150~purine ribonucleotide metabolic process	5	1.19048	0.245134	AT3G55010, AT4G11010, AT2G37690, AT1G74260, AT1G16350	290	115	13187	1.97706	1	0.914553	98.6618
Annotation Cluster 12	Enrichment Score: 1.8557214371814734
Category	Term	Count	%	PValue	Genes	List Total	Pop Hits	Pop Total	Fold Enrichment	Bonferroni	Benjamini	FDR
GOTERM_BP_FAT	GO:0019319~hexose biosynthetic process	4	0.952381	0.00665984	AT1G63000, AT2G45790, AT1G53500, AT3G51160	290	18	13187	10.105	0.995102	0.233521	9.74247
GOTERM_BP_FAT	GO:0046364~monosaccharide biosynthetic process	4	0.952381	0.00778196	AT1G63000, AT2G45790, AT1G53500, AT3G51160	290	19	13187	9.57314	0.998008	0.236908	11.2939
GOTERM_BP_FAT	GO:0009226~nucleotide-sugar biosynthetic process	3	0.714286	0.0155645	AT1G63000, AT1G53500, AT3G51160	290	9	13187	15.1575	0.999996	0.340469	21.3872
GOTERM_BP_FAT	GO:0046165~alcohol biosynthetic process	4	0.952381	0.0468194	AT1G63000, AT2G45790, AT1G53500, AT3G51160	290	37	13187	4.91594	1	0.579989	52.0764
Annotation Cluster 13	Enrichment Score: 1.7643099176510304
Category	Term	Count	%	PValue	Genes	List Total	Pop Hits	Pop Total	Fold Enrichment	Bonferroni	Benjamini	FDR
PIR_SUPERFAMILY	PIRSF000038:cytochrome b5	3	0.714286	0.00699066	AT2G32720, AT1G60660, AT2G46650	230	5	8411	21.9417	0.809021	0.338931	8.63499
INTERPRO	IPR018506:Cytochrome b5, heme-binding site	3	0.714286	0.0252785	AT2G32720, AT1G60660, AT2G46650	370	14	20592	11.9259	1	0.671074	31.5338
INTERPRO	IPR001199:Cytochrome b5	3	0.714286	0.0288271	AT2G32720, AT1G60660, AT2G46650	370	15	20592	11.1308	1	0.670944	35.1306
Annotation Cluster 14	Enrichment Score: 1.7217730795858994
Category	Term	Count	%	PValue	Genes	List Total	Pop Hits	Pop Total	Fold Enrichment	Bonferroni	Benjamini	FDR
GOTERM_BP_FAT	GO:0034654~nucleobase, nucleoside, nucleotide and nucleic acid biosynthetic process	10	2.38095	0.0113583	AT3G55010, AT5G23300, AT3G21110, AT3G20330, AT4G11010, AT5G03300, AT2G37690, AT3G09820, AT1G74260, AT1G16350	290	167	13187	2.7229	0.999888	0.285932	16.0739
GOTERM_BP_FAT	GO:0034404~nucleobase, nucleoside and nucleotide biosynthetic process	10	2.38095	0.0113583	AT3G55010, AT5G23300, AT3G21110, AT3G20330, AT4G11010, AT5G03300, AT2G37690, AT3G09820, AT1G74260, AT1G16350	290	167	13187	2.7229	0.999888	0.285932	16.0739
GOTERM_BP_FAT	GO:0009165~nucleotide biosynthetic process	8	1.90476	0.0529727	AT3G55010, AT5G23300, AT3G21110, AT3G20330, AT4G11010, AT2G37690, AT1G74260, AT1G16350	290	154	13187	2.3622	1	0.610086	56.6087
Annotation Cluster 15	Enrichment Score: 1.5326693033996752
Category	Term	Count	%	PValue	Genes	List Total	Pop Hits	Pop Total	Fold Enrichment	Bonferroni	Benjamini	FDR
INTERPRO	IPR001580:Calreticulin/calnexin	3	0.714286	0.00308992	AT1G09210, AT1G56340, AT5G07340	370	5	20592	33.3924	0.84765	0.209585	4.47567
INTERPRO	IPR018124:Calreticulin/calnexin, conserved site	3	0.714286	0.00308992	AT1G09210, AT1G56340, AT5G07340	370	5	20592	33.3924	0.84765	0.209585	4.47567
UP_SEQ_FEATURE	region of interest:4 X approximate repeats	3	0.714286	0.00602438	AT1G09210, AT1G56340, AT5G07340	218	5	8602	23.6752	0.92825	0.409576	8.1799
UP_SEQ_FEATURE	repeat:1-3	3	0.714286	0.0160455	AT1G09210, AT1G56340, AT5G07340	218	8	8602	14.797	0.999135	0.691313	20.4231
UP_SEQ_FEATURE	repeat:1-4	3	0.714286	0.0160455	AT1G09210, AT1G56340, AT5G07340	218	8	8602	14.797	0.999135	0.691313	20.4231
UP_SEQ_FEATURE	repeat:2-1	3	0.714286	0.0202903	AT1G09210, AT1G56340, AT5G07340	218	9	8602	13.1529	0.999869	0.672804	25.1366
UP_SEQ_FEATURE	repeat:2-2	3	0.714286	0.0202903	AT1G09210, AT1G56340, AT5G07340	218	9	8602	13.1529	0.999869	0.672804	25.1366
UP_SEQ_FEATURE	repeat:2-3	3	0.714286	0.0202903	AT1G09210, AT1G56340, AT5G07340	218	9	8602	13.1529	0.999869	0.672804	25.1366
UP_SEQ_FEATURE	repeat:1-1	3	0.714286	0.0202903	AT1G09210, AT1G56340, AT5G07340	218	9	8602	13.1529	0.999869	0.672804	25.1366
UP_SEQ_FEATURE	repeat:1-2	3	0.714286	0.0202903	AT1G09210, AT1G56340, AT5G07340	218	9	8602	13.1529	0.999869	0.672804	25.1366
SP_PIR_KEYWORDS	Lectin	3	0.714286	0.331221	AT1G09210, AT1G56340, AT5G07340	417	74	26059	2.53344	1	0.866213	99.3672
GOTERM_MF_FAT	GO:0005529~sugar binding	3	0.714286	0.745957	AT1G09210, AT1G56340, AT5G07340	300	124	14015	1.13024	1	0.999943	100
GOTERM_MF_FAT	GO:0030246~carbohydrate binding	3	0.714286	0.945171	AT1G09210, AT1G56340, AT5G07340	300	214	14015	0.654907	1	1	100
Annotation Cluster 16	Enrichment Score: 1.4306464002312003
Category	Term	Count	%	PValue	Genes	List Total	Pop Hits	Pop Total	Fold Enrichment	Bonferroni	Benjamini	FDR
GOTERM_BP_FAT	GO:0009220~pyrimidine ribonucleotide biosynthetic process	3	0.714286	0.0155645	AT5G23300, AT3G20330, AT4G11010	290	9	13187	15.1575	0.999996	0.340469	21.3872
GOTERM_BP_FAT	GO:0009218~pyrimidine ribonucleotide metabolic process	3	0.714286	0.0191769	AT5G23300, AT3G20330, AT4G11010	290	10	13187	13.6417	1	0.382242	25.6978
GOTERM_BP_FAT	GO:0006221~pyrimidine nucleotide biosynthetic process	3	0.714286	0.0764921	AT5G23300, AT3G20330, AT4G11010	290	21	13187	6.49606	1	0.690565	70.4973
GOTERM_BP_FAT	GO:0006220~pyrimidine nucleotide metabolic process	3	0.714286	0.0829629	AT5G23300, AT3G20330, AT4G11010	290	22	13187	6.20078	1	0.701643	73.5139
Annotation Cluster 17	Enrichment Score: 1.4134254425093524
Category	Term	Count	%	PValue	Genes	List Total	Pop Hits	Pop Total	Fold Enrichment	Bonferroni	Benjamini	FDR
GOTERM_BP_FAT	GO:0070585~protein localization in mitochondrion	4	0.952381	0.00665984	AT3G20000, AT3G27080, AT3G46560, AT5G50810	290	18	13187	10.105	0.995102	0.233521	9.74247
GOTERM_BP_FAT	GO:0006626~protein targeting to mitochondrion	4	0.952381	0.00665984	AT3G20000, AT3G27080, AT3G46560, AT5G50810	290	18	13187	10.105	0.995102	0.233521	9.74247
GOTERM_BP_FAT	GO:0007006~mitochondrial membrane organization	3	0.714286	0.0191769	AT3G27080, AT3G46560, AT5G50810	290	10	13187	13.6417	1	0.382242	25.6978
GOTERM_BP_FAT	GO:0006612~protein targeting to membrane	3	0.714286	0.14728	AT3G27080, AT3G46560, AT5G50810	290	31	13187	4.40056	1	0.83663	91.3188
GOTERM_BP_FAT	GO:0016044~membrane organization	3	0.714286	0.68395	AT3G27080, AT3G46560, AT5G50810	290	107	13187	1.27493	1	0.998358	100
Annotation Cluster 18	Enrichment Score: 1.408188984450904
Category	Term	Count	%	PValue	Genes	List Total	Pop Hits	Pop Total	Fold Enrichment	Bonferroni	Benjamini	FDR
GOTERM_BP_FAT	GO:0006564~L-serine biosynthetic process	3	0.714286	0.00677326	AT4G34200, AT2G17630, AT1G17745	290	6	13187	22.7362	0.995528	0.227105	9.90042
GOTERM_BP_FAT	GO:0009070~serine family amino acid biosynthetic process	4	0.952381	0.0273357	AT4G34200, AT4G39940, AT2G17630, AT1G17745	290	30	13187	6.06299	1	0.440428	34.6339
GOTERM_BP_FAT	GO:0009069~serine family amino acid metabolic process	4	0.952381	0.100798	AT4G34200, AT4G39940, AT2G17630, AT1G17745	290	51	13187	3.56646	1	0.744384	80.4036
GOTERM_BP_FAT	GO:0006563~L-serine metabolic process	3	0.714286	0.124815	AT4G34200, AT2G17630, AT1G17745	290	28	13187	4.87204	1	0.799695	87.0634

## Sheet: Induced_Annotation
SUPPLEMENTARY TABLE 6C. ANNOTATION FOR THE GENES WITHIN EACH CLUSTER FROM ST5A (STARVATION-INDUCED GENES MISREGULATED IN dcl1-9).
Cluster 1	Enrichment Score: 4.940007682003449
AGI	Description
AT5G46180	ornithine-delta-aminotransferase
AT3G30775	Methylenetetrahydrofolate reductase family protein
AT1G06570	phytoene desaturation 1
AT1G03090	methylcrotonyl-CoA carboxylase alpha chain, mitochondrial / 3-methylcrotonyl-CoA carboxylase 1 (MCCA)
AT4G34030	3-methylcrotonyl-CoA carboxylase
AT3G47340	glutamine-dependent asparagine synthase 1
AT4G33150	lysine-ketoglutarate reductase/saccharopine dehydrogenase bifunctional enzyme
AT5G54080	homogentisate 1,2-dioxygenase
AT5G65110	acyl-CoA oxidase 2
AT3G51840	acyl-CoA oxidase 4
Cluster 2	Enrichment Score: 3.673047429554878
AGI	Description
AT4G11360	RING-H2 finger A1B
AT5G42940	RING/U-box superfamily protein
AT4G26400	RING/U-box superfamily protein
AT3G47160	RING/U-box superfamily protein
AT5G22920	CHY-type/CTCHY-type/RING-type Zinc finger protein
AT4G28270	RING membrane-anchor 2
AT3G13430	RING/U-box superfamily protein
AT4G27470	RING membrane-anchor 3
AT5G19430	RING/U-box superfamily protein
AT1G79380	Ca(2)-dependent phospholipid-binding protein (Copine) family
AT5G38895	RING/U-box superfamily protein
AT1G17970	RING/U-box superfamily protein
AT5G64920	COP1-interacting protein 8
AT4G03510	RING membrane-anchor 1
AT3G02340	RING/U-box superfamily protein
AT3G15070	RING/U-box superfamily protein
AT1G24440	RING/U-box superfamily protein
AT1G02860	SPX (SYG1/Pho81/XPR1) domain-containing protein
AT5G24870	RING/U-box superfamily protein
AT3G19910	RING/U-box superfamily protein
AT1G62310	transcription factor jumonji (jmjC) domain-containing protein
AT3G56930	DHHC-type zinc finger family protein
AT4G05330	ARF-GAP domain 13
AT1G69570	Dof-type zinc finger DNA-binding family protein
AT3G12630	A20/AN1-like zinc finger family protein
AT4G22820	A20/AN1-like zinc finger family protein
AT2G36320	A20/AN1-like zinc finger family protein
AT3G52800	A20/AN1-like zinc finger family protein
Cluster 3	Enrichment Score: 3.17244804273043
AGI	Description
AT2G36320	A20/AN1-like zinc finger family protein
AT3G52800	A20/AN1-like zinc finger family protein
AT3G12630	A20/AN1-like zinc finger family protein
AT4G22820	A20/AN1-like zinc finger family protein
Cluster 4	Enrichment Score: 2.1565833540060395
AGI	Description
AT3G45300	isovaleryl-CoA-dehydrogenase
AT5G65110	acyl-CoA oxidase 2
AT3G51840	acyl-CoA oxidase 4
Cluster 5	Enrichment Score: 2.154253902056588
AGI	Description
AT1G48620	high mobility group A5
AT3G18035	winged-helix DNA-binding transcription factor family protein
AT1G06760	winged-helix DNA-binding transcription factor family protein
AT2G30620	winged-helix DNA-binding transcription factor family protein
Cluster 6	Enrichment Score: 1.8107241697080867
AGI	Description
AT4G23730	Galactose mutarotase-like superfamily protein
AT1G63180	UDP-D-glucose/UDP-D-galactose 4-epimerase 3
AT1G12780	UDP-D-glucose/UDP-D-galactose 4-epimerase 1
AT3G47800	Galactose mutarotase-like superfamily protein
Cluster 7	Enrichment Score: 1.7579821077413706
AGI	Description
AT1G48620	high mobility group A5
AT1G68110	ENTH/ANTH/VHS superfamily protein
AT2G28720	Histone superfamily protein
AT3G18035	winged-helix DNA-binding transcription factor family protein
AT5G54640	Histone superfamily protein
AT4G18740	Rho termination factor
AT1G06760	winged-helix DNA-binding transcription factor family protein
AT3G51880	high mobility group B1
AT2G30620	winged-helix DNA-binding transcription factor family protein
AT1G80190	partner of SLD five 1
AT1G04400	cryptochrome 2
Cluster 8	Enrichment Score: 1.7258054016036155
AGI	Description
AT5G17290	autophagy protein Apg5 family
AT1G03380	homolog of yeast autophagy 18 (ATG18) G
AT2G45170	AUTOPHAGY 8E
AT5G21170	5'-AMP-activated protein kinase beta-2 subunit protein
AT3G47340	glutamine-dependent asparagine synthase 1
AT5G54730	homolog of yeast autophagy 18 (ATG18) F
Cluster 9	Enrichment Score: 1.7188460704225363
AGI	Description
AT5G53350	CLP protease regulatory subunit X
AT3G30775	Methylenetetrahydrofolate reductase family protein
AT3G45300	isovaleryl-CoA-dehydrogenase
AT1G03090	methylcrotonyl-CoA carboxylase alpha chain, mitochondrial / 3-methylcrotonyl-CoA carboxylase 1 (MCCA)
AT4G34030	3-methylcrotonyl-CoA carboxylase
AT5G47040	lon protease 2
AT2G43400	electron-transfer flavoprotein:ubiquinone oxidoreductase
Cluster 10	Enrichment Score: 1.6889089314684727
AGI	Description
AT1G75220	Major facilitator superfamily protein
AT2G48020	Major facilitator superfamily protein
AT2G29290	NAD(P)-binding Rossmann-fold superfamily protein
AT1G11260	sugar transporter 1
AT5G27350	Major facilitator superfamily protein
AT1G77210	sugar transporter 14
AT1G08920	ERD (early response to dehydration) six-like 1
Cluster 11	Enrichment Score: 1.4818945668721897
AGI	Description
AT2G28110	Exostosin family protein
AT5G64570	beta-D-xylosidase 4
AT3G10740	alpha-L-arabinofuranosidase 1
Cluster 12	Enrichment Score: 1.468148782049173
AGI	Description
AT1G68110	ENTH/ANTH/VHS superfamily protein
AT2G45170	AUTOPHAGY 8E
AT4G16520	Ubiquitin-like superfamily protein
AT1G03550	Secretory carrier membrane protein (SCAMP) family protein
AT3G15580	Ubiquitin-like superfamily protein
Cluster 13	Enrichment Score: 1.465393599606516
AGI	Description
AT3G48360	BTB and TAZ domain protein 2
AT5G45110	NPR1-like protein 3
AT2G24240	BTB/POZ domain with WD40/YVTN repeat-like protein
AT4G37610	BTB and TAZ domain protein 5
AT2G30600	BTB/POZ domain-containing protein
Cluster 14	Enrichment Score: 1.447258294488825
AGI	Description
AT2G02710	PAS/LOV protein B
AT4G08920	cryptochrome 1
AT1G04400	cryptochrome 2
Cluster 15	Enrichment Score: 1.370709547283542
AGI	Description
AT2G19800	myo-inositol oxygenase 2
AT3G02040	senescence-related gene 3
AT5G41080	PLC-like phosphodiesterases superfamily protein
AT1G80460	Actin-like ATPase superfamily protein

## Sheet: Repressed_Annotation
SUPPLEMENTARY TABLE 6D. ANNOTATION FOR THE GENES WITHIN EACH CLUSTER FROM ST5B (STARVATION-REPRESSED GENES MISREGULATED IN dcl1-9).
Cluster 1	Enrichment Score: 67.15997892701348
AGI	Description
AT2G41840	Ribosomal protein S5 family protein
AT1G74060	Ribosomal protein L6 family protein
AT5G64650	Ribosomal protein L17 family protein
AT5G04800	Ribosomal S17 family protein
AT5G20160	Ribosomal protein L7Ae/L30e/S12e/Gadd45 family protein
AT3G09500	Ribosomal L29 family protein
AT5G23900	Ribosomal protein L13e family protein
AT5G16130	Ribosomal protein S7e family protein
AT5G02450	Ribosomal protein L36e family protein
AT3G44590	60S acidic ribosomal protein family
AT3G60245	Zinc-binding ribosomal protein family protein
AT3G53890	Ribosomal protein S21e
AT5G23740	ribosomal protein S11-beta
AT2G44120	Ribosomal protein L30/L7 family protein
AT2G17360	Ribosomal protein S4 (RPS4A) family protein
AT2G21580	Ribosomal protein S25 family protein
AT4G18100	Ribosomal protein L32e
AT2G32060	Ribosomal protein L7Ae/L30e/S12e/Gadd45 family protein
AT3G11120	Ribosomal protein L41 family
AT3G23390	Zinc-binding ribosomal protein family protein
AT1G80750	Ribosomal protein L30/L7 family protein
AT2G27530	Ribosomal protein L1p/L10e family
AT3G04840	Ribosomal protein S3Ae
AT4G10450	Ribosomal protein L6 family
AT5G59850	Ribosomal protein S8 family protein
AT5G15200	Ribosomal protein S4
AT5G27770	Ribosomal L22e protein family
AT5G60670	Ribosomal protein L11 family protein
AT4G26230	Ribosomal protein L31e family protein
AT3G02080	Ribosomal protein S19e family protein
AT5G48760	Ribosomal protein L13 family protein
AT2G40590	Ribosomal protein S26e family protein
AT1G22780	Ribosomal protein S13/S18 family
AT3G03600	ribosomal protein S2
AT3G22300	ribosomal protein S10
AT5G02610	Ribosomal L29 family protein
AT1G77940	Ribosomal protein L7Ae/L30e/S12e/Gadd45 family protein
AT1G04480	Ribosomal protein L14p/L23e family protein
AT3G48930	Nucleic acid-binding, OB-fold-like protein
AT2G19730	Ribosomal L28e protein family
AT2G25210	Ribosomal protein L39 family protein
AT2G45710	Zinc-binding ribosomal protein family protein
AT3G24830	Ribosomal protein L13 family protein
AT3G05560	Ribosomal L22e protein family
AT4G14320	Zinc-binding ribosomal protein family protein
AT5G47700	60S acidic ribosomal protein family
AT1G01100	60S acidic ribosomal protein family
AT1G09690	Translation protein SH3-like family protein
AT5G67510	Translation protein SH3-like family protein
AT2G37190	Ribosomal protein L11 family protein
AT4G17390	Ribosomal protein L23/L15e family protein
AT4G15000	Ribosomal L27e protein family
AT3G17465	ribosomal protein L3 plastid
AT5G20180	Ribosomal protein L36
AT2G37600	Ribosomal protein L36e family protein
AT3G07110	Ribosomal protein L13 family protein
AT3G22230	Ribosomal L27e protein family
AT5G27850	Ribosomal protein L18e/L15 superfamily protein
AT1G25260	Ribosomal protein L10 family protein
AT4G31985	Ribosomal protein L39 family protein
AT2G39460	ribosomal protein L23AA
AT1G41880	Ribosomal protein L35Ae family protein
AT3G05590	ribosomal protein L18
AT3G59540	Ribosomal L38e protein family
AT3G28900	Ribosomal protein L34e superfamily protein
AT5G53070	Ribosomal protein L9/RNase H1
AT3G18740	Ribosomal protein L7Ae/L30e/S12e/Gadd45 family protein
AT4G16720	Ribosomal protein L23/L15e family protein
AT3G11510	Ribosomal protein S11 family protein
AT2G09990	Ribosomal protein S5 domain 2-like superfamily protein
AT3G16080	Zinc-binding ribosomal protein family protein
AT1G15250	Zinc-binding ribosomal protein family protein
AT5G47930	Zinc-binding ribosomal protein family protein
AT5G58420	Ribosomal protein S4 (RPS4A) family protein
AT5G61170	Ribosomal protein S19e family protein
AT5G52650	RNA binding Plectin/S10 domain-containing protein
AT2G19750	Ribosomal protein S30 family protein
AT3G61110	ribosomal protein S27
AT5G02870	Ribosomal protein L4/L1 family
AT5G09510	Ribosomal protein S19 family protein
AT2G47110	ubiquitin 6
AT4G25890	60S acidic ribosomal protein family
AT5G41520	RNA binding Plectin/S10 domain-containing protein
AT2G27720	60S acidic ribosomal protein family
AT4G28360	Ribosomal protein L22p/L17e family protein
AT3G58700	Ribosomal L5P family protein
AT1G23290	Ribosomal protein L18e/L15 superfamily protein
AT5G10360	Ribosomal protein S6e
AT4G00100	ribosomal protein S13A
AT3G11250	Ribosomal protein L10 family protein
AT3G62870	Ribosomal protein L7Ae/L30e/S12e/Gadd45 family protein
AT2G37270	ribosomal protein 5B
AT1G57660	Translation protein SH3-like family protein
AT4G30220	small nuclear ribonucleoprotein F
AT4G25630	fibrillarin 2
AT4G30330	Small nuclear ribonucleoprotein family protein
AT4G23620	Ribosomal protein L25/Gln-tRNA synthetase, anti-codon-binding domain
AT3G01790	Ribosomal protein L13 family protein
AT2G44860	Ribosomal protein L24e family protein
AT3G18760	Translation elongation factor EF1B/ribosomal protein S6 family protein
AT1G48630	receptor for activated C kinase 1B
AT2G28000	chaperonin-60alpha
AT1G18080	Transducin/WD40 repeat-like superfamily protein
AT1G55490	chaperonin 60 beta
AT5G55070	Dihydrolipoamide succinyltransferase
AT1G20950	Phosphofructokinase family protein
AT2G43100	isopropylmalate isomerase 2
AT4G14960	Tubulin/FtsZ family protein
AT3G07390	auxin-responsive family protein
AT3G60360	embryo sac development arrest 14
AT4G20440	small nuclear ribonucleoprotein associated protein B
AT5G27620	cyclin H;1
AT1G54270	eif4a-2
AT2G24050	MIF4G domain-containing protein / MA3 domain-containing protein
AT1G18850	unknown protein; FUNCTIONS IN: molecular_function unknown; INVOLVED IN: biological_process unknown; LOCATED IN: nucleolus; EXPRESSED IN: 22 plant structures; EXPRESSED DURING: 13 growth stages; Has 40 Blast hits to 40 proteins in 13 species: Archae - 0; Bacteria - 0; Metazoa - 0; Fungi - 0; Plants - 40; Viruses - 0; Other Eukaryotes - 0 (source: NCBI BLink).
AT1G14410	ssDNA-binding transcriptional regulator
AT5G66680	dolichyl-diphosphooligosaccharide-protein glycosyltransferase 48kDa subunit family protein
AT2G18510	RNA-binding (RRM/RBD/RNP motifs) family protein
AT3G52930	Aldolase superfamily protein
AT5G40770	prohibitin 3
AT1G50920	Nucleolar GTP-binding protein
AT2G27840	histone deacetylase-related / HD-related
AT5G15550	Transducin/WD40 repeat-like superfamily protein
AT1G60850	DNA-directed RNA polymerase family protein
Cluster 2	Enrichment Score: 20.61770467536669
AGI	Description
AT3G15020	Lactate/malate dehydrogenase family protein
AT2G41840	Ribosomal protein S5 family protein
AT1G74060	Ribosomal protein L6 family protein
AT3G52930	Aldolase superfamily protein
AT5G20160	Ribosomal protein L7Ae/L30e/S12e/Gadd45 family protein
AT3G09500	Ribosomal L29 family protein
AT5G40770	prohibitin 3
AT1G77510	PDI-like 1-2
AT1G18850	unknown protein; FUNCTIONS IN: molecular_function unknown; INVOLVED IN: biological_process unknown; LOCATED IN: nucleolus; EXPRESSED IN: 22 plant structures; EXPRESSED DURING: 13 growth stages; Has 40 Blast hits to 40 proteins in 13 species: Archae - 0; Bacteria - 0; Metazoa - 0; Fungi - 0; Plants - 40; Viruses - 0; Other Eukaryotes - 0 (source: NCBI BLink).
AT5G16130	Ribosomal protein S7e family protein
AT1G50920	Nucleolar GTP-binding protein
AT5G03160	homolog of mamallian P58IPK
AT1G80720	Mitochondrial glycoprotein family protein
AT2G44120	Ribosomal protein L30/L7 family protein
AT4G18100	Ribosomal protein L32e
AT5G02590	Tetratricopeptide repeat (TPR)-like superfamily protein
AT1G22840	CYTOCHROME C-1
AT4G30220	small nuclear ribonucleoprotein F
AT1G80750	Ribosomal protein L30/L7 family protein
AT1G26470	FUNCTIONS IN: molecular_function unknown; INVOLVED IN: regulation of transcription; LOCATED IN: nucleus, H4/H2A histone acetyltransferase complex; EXPRESSED IN: 23 plant structures; EXPRESSED DURING: 15 growth stages; CONTAINS InterPro DOMAIN/s: CT20 (InterPro:IPR012423); Has 60 Blast hits to 60 proteins in 27 species: Archae - 0; Bacteria - 0; Metazoa - 26; Fungi - 2; Plants - 30; Viruses - 0; O…
AT3G46560	Tim10/DDP family zinc finger protein
AT5G15200	Ribosomal protein S4
AT5G27770	Ribosomal L22e protein family
AT2G27840	histone deacetylase-related / HD-related
AT2G41600	Mitochondrial glycoprotein family protein
AT4G25630	fibrillarin 2
AT2G39795	Mitochondrial glycoprotein family protein
AT3G03600	ribosomal protein S2
AT1G22780	Ribosomal protein S13/S18 family
AT3G22300	ribosomal protein S10
AT1G04480	Ribosomal protein L14p/L23e family protein
AT4G20440	small nuclear ribonucleoprotein associated protein B
AT2G47470	thioredoxin family protein
AT2G45710	Zinc-binding ribosomal protein family protein
AT3G05560	Ribosomal L22e protein family
AT5G41010	DNA directed RNA polymerase, 7 kDa subunit
AT1G09690	Translation protein SH3-like family protein
AT3G60360	embryo sac development arrest 14
AT5G15550	Transducin/WD40 repeat-like superfamily protein
AT1G56340	calreticulin 1a
AT2G37190	Ribosomal protein L11 family protein
AT4G17390	Ribosomal protein L23/L15e family protein
AT4G11010	nucleoside diphosphate kinase 3
AT5G50810	translocase inner membrane subunit 8
AT3G07110	Ribosomal protein L13 family protein
AT1G21750	PDI-like 1-1
AT2G39460	ribosomal protein L23AA
AT5G66680	dolichyl-diphosphooligosaccharide-protein glycosyltransferase 48kDa subunit family protein
AT3G53560	Tetratricopeptide repeat (TPR)-like superfamily protein
AT3G11510	Ribosomal protein S11 family protein
AT5G58420	Ribosomal protein S4 (RPS4A) family protein
AT5G48580	FK506- and rapamycin-binding protein 15 kD-2
AT2G19750	Ribosomal protein S30 family protein
AT1G09210	calreticulin 1b
AT5G02870	Ribosomal protein L4/L1 family
AT5G09510	Ribosomal protein S19 family protein
AT4G14960	Tubulin/FtsZ family protein
AT2G47110	ubiquitin 6
AT2G18510	RNA-binding (RRM/RBD/RNP motifs) family protein
AT1G60850	DNA-directed RNA polymerase family protein
AT2G44860	Ribosomal protein L24e family protein
AT5G59180	DNA-directed RNA polymerase II
AT1G23290	Ribosomal protein L18e/L15 superfamily protein
AT4G00100	ribosomal protein S13A
Cluster 3	Enrichment Score: 3.815291480447543
AGI	Description
AT2G37250	adenosine kinase
AT4G08390	stromal ascorbate peroxidase
AT4G37000	accelerated cell death 2 (ACD2)
AT1G63970	isoprenoid F
AT4G11010	nucleoside diphosphate kinase 3
AT4G39940	APS-kinase 2
AT3G17465	ribosomal protein L3 plastid
AT1G17745	D-3-phosphoglycerate dehydrogenase
AT3G55010	phosphoribosylformylglycinamidine cyclo-ligase, chloroplast / phosphoribosyl-aminoimidazole synthetase / AIR synthase (PUR5)
AT1G31860	histidine biosynthesis bifunctional protein (HISIE)
AT3G25780	allene oxide cyclase 3
AT4G39120	myo-inositol monophosphatase like 2
AT1G63940	monodehydroascorbate reductase 6
AT5G51820	phosphoglucomutase
AT3G20330	PYRIMIDINE B
AT2G04400	Aldolase-type TIM barrel family protein
AT3G14390	Pyridoxal-dependent decarboxylase family protein
AT1G55490	chaperonin 60 beta
AT4G19710	aspartate kinase-homoserine dehydrogenase ii
AT2G28000	chaperonin-60alpha
AT1G19920	Pseudouridine synthase/archaeosine transglycosylase-like family protein
AT1G31180	isopropylmalate dehydrogenase 3
AT3G21110	purin 7
AT2G15620	nitrite reductase 1
AT3G21580	cobalt ion transmembrane transporters
AT3G52380	chloroplast RNA-binding protein 33
AT3G52960	Thioredoxin superfamily protein
AT1G74260	purine biosynthesis 4
AT2G29760	Tetratricopeptide repeat (TPR)-like superfamily protein
Cluster 4	Enrichment Score: 3.4442769650953364
AGI	Description
AT2G37250	adenosine kinase
AT2G36880	methionine adenosyltransferase 3
AT3G03780	methionine synthase 2
AT2G04400	Aldolase-type TIM barrel family protein
AT4G39940	APS-kinase 2
AT1G17745	D-3-phosphoglycerate dehydrogenase
AT3G14390	Pyridoxal-dependent decarboxylase family protein
AT4G19710	aspartate kinase-homoserine dehydrogenase ii
AT3G57560	N-acetyl-l-glutamate kinase
AT1G31860	histidine biosynthesis bifunctional protein (HISIE)
AT1G14810	semialdehyde dehydrogenase family protein
AT4G34200	D-3-phosphoglycerate dehydrogenase
AT1G31180	isopropylmalate dehydrogenase 3
AT2G17630	Pyridoxal phosphate (PLP)-dependent transferases superfamily protein
AT2G43100	isopropylmalate isomerase 2
AT5G55120	galactose-1-phosphate guanylyltransferase (GDP)s;GDP-D-glucose phosphorylases;quercetin 4'-O-glucosyltransferases
AT2G45790	phosphomannomutase
AT2G20610	Tyrosine transaminase family protein
AT5G47630	mitochondrial acyl carrier protein 3
AT3G25780	allene oxide cyclase 3
Cluster 5	Enrichment Score: 3.067050749745603
AGI	Description
AT3G07110	Ribosomal protein L13 family protein
AT3G01790	Ribosomal protein L13 family protein
AT3G24830	Ribosomal protein L13 family protein
AT5G48760	Ribosomal protein L13 family protein
Cluster 6	Enrichment Score: 2.6619379269866426
AGI	Description
AT3G20000	translocase of the outer mitochondrial membrane 40
AT1G29310	SecY protein transport family protein
AT4G26670	Mitochondrial import inner membrane translocase subunit Tim17/Tim22/Tim23 family protein
AT2G35190	novel plant snare 11
AT3G27080	translocase of outer membrane 20 kDa subunit 3
AT3G21250	multidrug resistance-associated protein 6
AT3G46560	Tim10/DDP family zinc finger protein
AT5G50460	secE/sec61-gamma protein transport protein
AT5G50810	translocase inner membrane subunit 8
AT3G25120	Mitochondrial import inner membrane translocase subunit Tim17/Tim22/Tim23 family protein
AT2G46520	cellular apoptosis susceptibility protein, putative / importin-alpha re-exporter, putative
Cluster 7	Enrichment Score: 2.4350502490262866
AGI	Description
AT3G01820	P-loop containing nucleoside triphosphate hydrolases superfamily protein
AT2G37250	adenosine kinase
AT3G09820	adenosine kinase 1
AT4G11010	nucleoside diphosphate kinase 3
AT5G50370	Adenylate kinase family protein
Cluster 8	Enrichment Score: 2.3420673409029362
AGI	Description
AT1G21750	PDI-like 1-1
AT2G02810	UDP-galactose transporter 1
AT2G47470	thioredoxin family protein
AT1G53300	tetratricopetide-repeat thioredoxin-like 1
AT1G04980	PDI-like 2-2
AT1G77510	PDI-like 1-2
AT3G25780	allene oxide cyclase 3
AT3G52960	Thioredoxin superfamily protein
Cluster 9	Enrichment Score: 2.1295449355126332
AGI	Description
AT3G20000	translocase of the outer mitochondrial membrane 40
AT4G32400	Mitochondrial substrate carrier family protein
AT2G22500	uncoupling protein 5
AT5G23300	pyrimidine d
AT5G13490	ADP/ATP carrier 2
AT4G26670	Mitochondrial import inner membrane translocase subunit Tim17/Tim22/Tim23 family protein
AT4G11010	nucleoside diphosphate kinase 3
AT3G27080	translocase of outer membrane 20 kDa subunit 3
AT3G46560	Tim10/DDP family zinc finger protein
AT1G08220	FUNCTIONS IN: molecular_function unknown; INVOLVED IN: mitochondrial proton-transporting ATP synthase complex assembly; LOCATED IN: mitochondrial inner membrane; EXPRESSED IN: 18 plant structures; EXPRESSED DURING: 7 growth stages; CONTAINS InterPro DOMAIN/s: ATPase assembly factor ATP10, mitochondria (InterPro:IPR007849); Has 152 Blast hits to 152 proteins in 76 species: Archae - 6; Bacteria - 0…
AT5G50810	translocase inner membrane subunit 8
AT3G25120	Mitochondrial import inner membrane translocase subunit Tim17/Tim22/Tim23 family protein
AT3G52930	Aldolase superfamily protein
Cluster 10	Enrichment Score: 2.0567085552616304
AGI	Description
AT5G15200	Ribosomal protein S4
AT3G19440	Pseudouridine synthase family protein
AT2G17360	Ribosomal protein S4 (RPS4A) family protein
AT5G58420	Ribosomal protein S4 (RPS4A) family protein
Cluster 11	Enrichment Score: 1.8815340340869227
AGI	Description
AT3G55010	phosphoribosylformylglycinamidine cyclo-ligase, chloroplast / phosphoribosyl-aminoimidazole synthetase / AIR synthase (PUR5)
AT5G23300	pyrimidine d
AT2G37690	phosphoribosylaminoimidazole carboxylase, putative / AIR carboxylase, putative
AT3G21110	purin 7
AT4G11010	nucleoside diphosphate kinase 3
AT1G74260	purine biosynthesis 4
AT1G16350	Aldolase-type TIM barrel family protein
Cluster 12	Enrichment Score: 1.8557214371814734
AGI	Description
AT1G63000	nucleotide-rhamnose synthase/epimerase-reductase
AT2G45790	phosphomannomutase
AT1G53500	NAD-dependent epimerase/dehydratase family protein
AT3G51160	NAD(P)-binding Rossmann-fold superfamily protein
Cluster 13	Enrichment Score: 1.7643099176510304
AGI	Description
AT2G32720	cytochrome B5 isoform B
AT1G60660	cytochrome B5-like protein
AT2G46650	cytochrome B5 isoform C
Cluster 14	Enrichment Score: 1.7217730795858994
AGI	Description
AT3G55010	phosphoribosylformylglycinamidine cyclo-ligase, chloroplast / phosphoribosyl-aminoimidazole synthetase / AIR synthase (PUR5)
AT5G23300	pyrimidine d
AT3G21110	purin 7
AT3G20330	PYRIMIDINE B
AT4G11010	nucleoside diphosphate kinase 3
AT5G03300	adenosine kinase 2
AT2G37690	phosphoribosylaminoimidazole carboxylase, putative / AIR carboxylase, putative
AT3G09820	adenosine kinase 1
AT1G74260	purine biosynthesis 4
AT1G16350	Aldolase-type TIM barrel family protein
Cluster 15	Enrichment Score: 1.5326693033996752
AGI	Description
AT1G09210	calreticulin 1b
AT1G56340	calreticulin 1a
AT5G07340	Calreticulin family protein
Cluster 16	Enrichment Score: 1.4306464002312003
AGI	Description
AT5G23300	pyrimidine d
AT3G20330	PYRIMIDINE B
AT4G11010	nucleoside diphosphate kinase 3
Cluster 17	Enrichment Score: 1.4134254425093524
AGI	Description
AT3G20000	translocase of the outer mitochondrial membrane 40
AT3G27080	translocase of outer membrane 20 kDa subunit 3
AT3G46560	Tim10/DDP family zinc finger protein
AT5G50810	translocase inner membrane subunit 8
Cluster 18	Enrichment Score: 1.408188984450904
AGI	Description
AT4G34200	D-3-phosphoglycerate dehydrogenase
AT2G17630	Pyridoxal phosphate (PLP)-dependent transferases superfamily protein
AT4G39940	APS-kinase 2
AT1G17745	D-3-phosphoglycerate dehydrogenase
